# Supplementary material
Source: publisher figshare collection journal article supplement (https://acs.figshare.com/ndownloader/files/4524688)

# Formation of Medium-Sized Nitrogen Heterocycles from $\gamma$ -Silyloxy- $\gamma$ -Lactams

Nicholas M. Leonard and K. A. Woerpel\*

Department of Chemistry  
University of California, Irvine  
Irvine, CA 92697–2025

## Supporting Information

### Contents:

|       |                                                                                                       |      |
|-------|-------------------------------------------------------------------------------------------------------|------|
| I.    | Synthesis of $\alpha$ -Silyloxy Allylic Silanes                                                       | S-1  |
| II.   | Synthesis of Enantioenriched $\alpha$ -Silyloxy Allylic Silane (–)- <b>14</b> by Asymmetric Reduction | S-3  |
| III.  | [3+2] Cycloaddition of $\alpha$ -Silyloxy Allylic Silanes and Chlorosulfonyl Isocyanate               | S-4  |
| IV.   | Nucleophilic Substitution of $\gamma$ -Siloxy- $\gamma$ -Lactams                                      | S-5  |
| V.    | Stereochemistry and Structural Proofs                                                                 | S-8  |
| VI.   | HPLC Data for Enantioenriched $\alpha$ -Silyloxy Allylic Silane (–)- <b>14</b>                        | S-12 |
| VII.  | X-Ray Crystallography                                                                                 | S-14 |
| VIII. | References                                                                                            | S-39 |
| IX.   | Spectral Data                                                                                         | S-40 |

**General.**  $^1\text{H}$  NMR and  $^{13}\text{C}$  NMR spectra were recorded at ambient temperature at 500 and 125 MHz, respectively. The data are reported as follows: chemical shift in ppm from internal tetramethylsilane on  $\delta$  scale, multiplicity (br = broad, s = singlet, d = doublet, t = triplet, q = quartet, m = multiplet), coupling constants (Hz), and integration. High resolution mass spectra were acquired by peak matching. Analytical gas-liquid chromatography (GLC) was performed on a gas chromatograph equipped with an auto sampler and a flame ionization detector. A fused silica, wall-coated capillary column (30 m x 0.32 mm x 0.25  $\mu\text{m}$ ) was used with helium as the carrier gas. Melting points were obtained using a melting point apparatus and were reported uncorrected. Liquid chromatography was performed using forced flow (flash chromatography) of the indicated solvent system on 60 (230–400) mesh silica gel ( $\text{SiO}_2$ ). All reactions, unless specified, were performed under an atmosphere of nitrogen in glassware that had been flame-dried under vacuum. Unless otherwise noted, all reagents were commercially obtained, and where appropriate, purified prior to use. Toluene, THF,  $\text{Et}_2\text{O}$ , and  $\text{CH}_2\text{Cl}_2$  were dried by filtration through alumina according to the procedure of Grubbs.<sup>1</sup>  $\text{BF}_3\cdot\text{OEt}_2$  was distilled from  $\text{Et}_2\text{O}$  and stored in a sealed tube. Alkylolithium reagents were purchased and titrated prior to use with *N*-benzylbenzamide.<sup>2</sup> Silyllithium reagents were prepared and titrated according to the procedure of Fleming.<sup>3,4</sup>

### I. Synthesis of $\alpha$ -Silyloxy Allylic Silanes

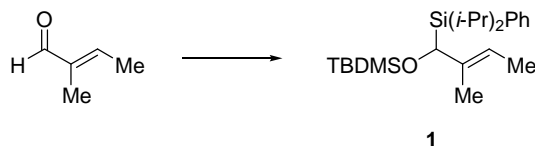

**$\alpha$ -Siloxy Allylic Silane 1.** To a solution of  $\text{PhLi-Pr}_2\text{SiCl}$  <sup>5</sup> (8.43 g, 37.0 mmol) in THF (75 mL) was added lithium wire (1.30 g, 185 mmol). The suspension was stirred at 24 °C for 18 h. The resultant red solution was transferred to a dry flask and cooled to –78 °C as a solution of *trans*-2-methyl-2-butenal (3.00 mL, 31.0 mmol) in THF (50 mL) was added dropwise. The reaction mixture was stirred at –78 °C for 2 h. The reaction mixture was diluted with saturated aqueous  $\text{NH}_4\text{Cl}$  (100 mL). The layers were separated and the aqueous layer was extracted with  $\text{EtOAc}$  (3  $\times$  50 mL). The combined organic layers were washed with saturated aqueous  $\text{NaCl}$  (100 mL). The resultant organic phase was dried with  $\text{MgSO}_4$  and filtered. The filtrate was concentrated *in vacuo* to afford a yellow oil. The oil was dissolved in DMF (10 mL) and  $\text{TBDMSCl}$  (9.35 g, 62.0 mmol) and imidazole (3.17 g, 46.5 mmol) were added. The reaction mixture was stirred at 24 °C for 18 h. The reaction mixture was diluted with saturated aqueous  $\text{NH}_4\text{Cl}$  (100 mL) and hexanes (50 mL). The layers were separated and the aqueous layer was extracted with hexanes (3  $\times$  75 mL). The combined organic layers were washed with saturated aqueous  $\text{NaCl}$  (75 mL). The resultant organic phase was dried with  $\text{MgSO}_4$  and filtered. The filtrate was concentrated *in vacuo* to afford unpurified **1** as a colorless oil. Purification by flash chromatography (hexanes) provided **1** as a colorless oil (8.82 g, 73%):  $^1\text{H}$  NMR ( $\text{CDCl}_3$ , 400 MHz)  $\delta$  7.63 (m, 2H), 7.30 (m, 3H), 5.35 (q,  $J$  = 6.7, 1H), 4.36 (s, 1H), 1.52 (d,  $J$  = 6.8, 3H), 1.44–1.33 (m, 2H), 1.39 (s, 3H), 1.12 (m, 9H), 1.01 (d,  $J$  = 7.5, 3H), 0.88 (s, 9H), 0.02 (s, 3H), –0.06 (s, 3H);  $^{13}\text{C}$  NMR ( $\text{CDCl}_3$ , 100 MHz)  $\delta$  138.1, 135.9, 135.5, 128.8, 127.3, 119.4, 72.7, 26.2, 18.9, 18.7, 18.6, 18.5, 18.4, 14.6, 13.4, 11.7, 11.0, –3.8, –

5.2; IR (thin film) 2929, 2865, 1465, 1254  $\text{cm}^{-1}$ ; HRMS (ESI)  $m/z$  calcd for  $\text{C}_{23}\text{H}_{43}\text{OSi}_2$  ( $M + H$ )<sup>+</sup> 391.2852, found 391.2845. Anal. Calcd for  $\text{C}_{23}\text{H}_{42}\text{OSi}_2$ : C, 70.70; H, 10.83. Found: C, 70.98; H, 10.99.

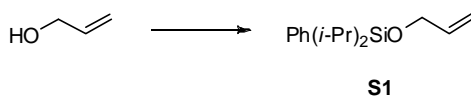

**Allylic Silylether S1.** To a solution of allylic alcohol (1.70 mL, 25.0 mmol),  $\text{Ph}(\text{i-Pr})_2\text{SiCl}_5$  (6.24 g, 27.5 mmol), and DMAP (0.611 g, 5.00 mmol) in  $\text{CH}_2\text{Cl}_2$  (50 mL) was added a solution of triethylamine (4.20 mL, 30.0 mmol) in  $\text{CH}_2\text{Cl}_2$  (10 mL). The reaction mixture was stirred at 24 °C for 12 h. The reaction mixture was diluted with saturated aqueous  $\text{NH}_4\text{Cl}$  (50 mL) and concentrated *in vacuo*. Hexanes (30 mL) was added, and the layers were separated. The aqueous layer was extracted with hexanes ( $3 \times 20$  mL), and the combined organic layers were washed with saturated aqueous  $\text{NaCl}$  (50 mL). The resultant organic phase was dried with  $\text{MgSO}_4$  and filtered. The filtrate was concentrated *in vacuo* to afford unpurified **S1** as a yellow oil. Purification by flash chromatography (hexanes to 10:90 EtOAc/hexanes) provided **S1** as a clear oil (5.38 g, 87%):  $^1\text{H}$  NMR ( $\text{CDCl}_3$ , 400 MHz)  $\delta$  7.55 (m, 2H), 7.37 (m, 3H), 6.03–5.93 (ddt,  $J = 17.1, 10.5, 4.4$ , 1H), 5.39 (ddd,  $J = 17.1, 2.0, 2.0$ , 1H), 5.14 (ddd,  $J = 10.5, 1.8, 1.8$ , 1H), 4.32 (ddd,  $J = 4.4, 1.9, 1.9$ , 2H), 1.34–1.26 (m, 2H), 1.08 (d,  $J = 7.4$ , 6H), 1.02 (d,  $J = 7.5$ , 6H);  $^{13}\text{C}$  NMR ( $\text{CDCl}_3$ , 100 MHz)  $\delta$  137.4, 134.8, 134.3, 129.4, 127.8, 114.1, 64.8, 17.6, 17.4, 12.3; IR (thin film) 2944, 2867, 1465  $\text{cm}^{-1}$ ; HRMS (ESI)  $m/z$  calcd for  $\text{C}_{15}\text{H}_{24}\text{NaOSi}$  ( $M + \text{Na}$ )<sup>+</sup> 271.1494, found 271.1503. Anal. Calcd for  $\text{C}_{15}\text{H}_{24}\text{OSi}$ : C, 72.52; H, 9.74. Found: C, 72.63; H, 9.84.

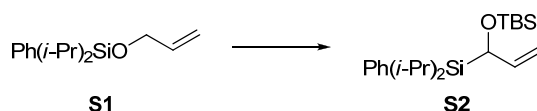

**Allylic Silane S2.** To a cooled solution of **S1** (4.10 g, 16.5 mmol) and  $\text{LiCl}$  (2.10 g, 49.5 mmol) in THF (100 mL) was added *s*-BuLi (33.0 mL, 1.0 M in 92:8 cyclohexane/hexanes, 33 mmol). The reaction mixture was warmed to –42 °C, and stirred for 1 h. The reaction mixture was poured onto a vigorously stirring saturated solution of aqueous  $\text{NH}_4\text{Cl}$  (800 mL). The layers were separated, and the aqueous layer was extracted with EtOAc ( $3 \times 100$  mL). The combined organic layers were washed with saturated aqueous  $\text{NaCl}$  (75 mL). The resultant organic phase was dried with  $\text{Na}_2\text{SO}_4$  and filtered. The filtrate was concentrated *in vacuo* to afford a yellow oil. The oil was dissolved in DMF (30 mL) and stirred at 24 °C as TBDMSCl (4.97 g, 33.0 mmol) and imidazole (1.68 g, 24.8 mmol) were added. The reaction mixture was stirred at 24 °C for 18 h. The reaction mixture was diluted with saturated aqueous  $\text{NH}_4\text{Cl}$  (100 mL) and hexanes (50 mL). The layers were separated and aqueous layer was extracted with hexanes ( $3 \times 30$  mL). The combined organic layers were washed with saturated aqueous  $\text{NaCl}$  (50 mL). The resultant organic phase was dried with  $\text{MgSO}_4$  and filtered. The filtrate was concentrated *in vacuo* to afford unpurified **S2** as a colorless oil. Purification by flash chromatography (hexanes) provided **S2** as a colorless oil (4.66 g, 78%):  $^1\text{H}$  NMR ( $\text{CDCl}_3$ , 400 MHz)  $\delta$  7.54 (m, 2H), 7.31 (m, 3H), 5.96 (ddd,  $J = 17.2, 10.5, 6.7$ , 1H), 5.05 (dt,  $J = 17.1, 1.8$ , 1H), 4.89 (dt,  $J = 10.5, 1.8$ , 1H), 4.53 (dt,  $J = 6.7, 1.7$ , 1H), 1.47–1.35 (m, 2H), 1.10 (d,  $J = 7.5$ , 3H), 1.09 (d,  $J = 7.5$ , 6H), 1.08 (d,  $J = 7.5$ , 3H), 0.86 (s, 9H), –0.01 (s, 3H), –0.04 (s, 3H).

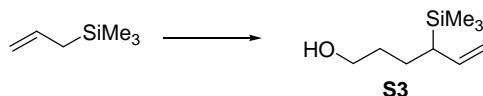

**Alcohol S3.** To a cooled (–42 °C) solution of allyltrimethylsilane (22.0 mL, 139 mmol) and *N,N,N',N'*-tetramethyl-ethane-1,2-diamine (20.9 mL, 139 mmol) in THF (300 mL) was added *s*-BuLi (104 mL, 1.33 M solution in hexanes, 139 mmol). After 30 min, 3-bromo-1-propanol (5.00 mL, 55.4 mmol) was added over 15 min by syringe pump. The reaction mixture was warmed to 24 °C and stirred for 12 h. The reaction mixture was diluted with  $\text{Et}_2\text{O}$  (100 mL) and saturated aqueous  $\text{NaHCO}_3$  (100 mL). The layers were separated and the aqueous layer was extracted with  $\text{Et}_2\text{O}$  ( $3 \times 50$  mL). The combined organic layers were washed with saturated aqueous  $\text{NaCl}$  (100 mL). The resultant organic phase was dried with  $\text{Na}_2\text{SO}_4$  and filtered. The filtrate was concentrated *in vacuo* to afford unpurified **S3** as a yellow oil. Purification by flash chromatography (10:90 to 30:70 EtOAc/hexanes) provided **S3** as a colorless oil (5.76 g, 60%). Spectral data was identical to that reported in literature:<sup>6</sup>  $^1\text{H}$  NMR ( $\text{CDCl}_3$ , 400 MHz)  $\delta$  5.63 (ddd,  $J = 17.1, 10.3, 9.2$ , 1H), 4.91 (dd,  $J = 10.3, 2.0$ , 1H), 4.85 (ddd,  $J = 17.0, 2.0, 0.9$ , 1H), 3.66 (m, 2H), 1.74 (m, 1H), 1.63–1.41 (m, 4H), 0.00 (s, 9H);  $^{13}\text{C}$  NMR ( $\text{CDCl}_3$ , 125 MHz)  $\delta$  140.2, 112.3, 63.1, 34.8, 32.7, 24.7, –1.0, –3.2; IR (thin film) 3309, 1627, 1248  $\text{cm}^{-1}$ ; HRMS (ESI)  $m/z$  calcd for  $\text{C}_9\text{H}_{20}\text{NaOSi}$  ( $M + \text{Na}$ )<sup>+</sup> 195.1181, found 195.1180. Anal. Calcd for  $\text{C}_9\text{H}_{20}\text{OSi}$ : C, 62.72; H, 11.70. Found: C, 62.93; H, 11.86.

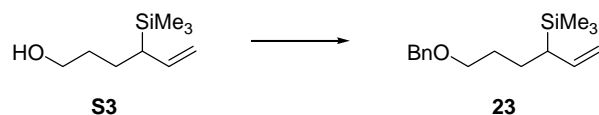

**Allylic Silane 23.** To a cooled (0 °C) suspension of NaH (0.059 g, 2.3 mmol) in THF (2 mL) was added a solution of **S3** (0.200 g, 1.16 mmol) in THF (2 mL). The reaction mixture was stirred at 0 °C for 30 min, and benzylbromide (0.28 mL, 2.3 mmol) was added dropwise. The reaction mixture was warmed to 24 °C and stirred for 20 h. The reaction mixture was diluted with EtOAc (10 mL) and saturated aqueous H<sub>2</sub>O (10 mL). The layers were separated and the aqueous layer was extracted with EtOAc (3 × 5 mL). The combined organic layers were washed with saturated aqueous NaCl (10 mL). The resultant organic phase was dried with Na<sub>2</sub>SO<sub>4</sub> and filtered. The filtrate was concentrated *in vacuo* to afford unpurified **23** as a colorless oil. Purification by flash chromatography (2:1 to 1:1 hexanes/toluene) provided **23** as a colorless oil (0.285 g, 94%): <sup>1</sup>H NMR (CDCl<sub>3</sub>, 400 MHz) δ 7.35 (m, 4H), 7.28 (m, 1H), 5.60 (ddd, *J* = 17.1, 10.3, 9.3, 1H), 4.88 (dd, *J* = 10.3, 1.9, 1H), 4.80 (ddd, *J* = 17.1, 2.0, 0.9, 1H), 4.51 (s, 2H), 3.46 (t, *J* = 6.4, 2H), 1.79 (m, 1H), 1.68–1.35 (m, 4H), –0.03 (s, 9H); <sup>13</sup>C NMR (CDCl<sub>3</sub>, 125 MHz) δ 140.2, 138.8, 128.5, 127.8, 127.6, 112.2, 72.9, 70.3, 34.8, 29.5, 25.0, –3.2; IR (thin film) 1428, 1102 cm<sup>–1</sup>; HRMS (ESI) *m/z* calcd for C<sub>16</sub>H<sub>26</sub>NaOSi (M + Na)<sup>+</sup> 285.1651 found 285.1655. Anal. Calcd for C<sub>16</sub>H<sub>26</sub>OSi: C, 73.22; H, 9.98. Found: C, 73.29; H, 10.11.

## II. Synthesis of Enantioenriched α-Silyloxy Allylic Silane (–)-14 by Asymmetric Reduction

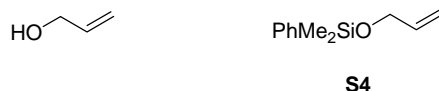

**Allylic Silylether S4.** To a cooled (–78 °C) solution of allylic alcohol (1.00 mL, 14.7 mmol), PhMe<sub>2</sub>SiCl (3.70 mL, 22.1 mmol), and DMAP (0.900 g, 7.35 mmol) in CH<sub>2</sub>Cl<sub>2</sub> (50 mL) was added triethylamine (3.83 mL, 29.4 mmol). The reaction mixture was stirred at 24 °C for 36 h. The reaction mixture was diluted H<sub>2</sub>O (15 mL) and the CH<sub>2</sub>Cl<sub>2</sub> was removed *in vacuo*. The resulting slurry was diluted with saturated aqueous NH<sub>4</sub>Cl (20 mL) and hexanes (20 mL). The layers were separated, and the aqueous layer was extracted with hexanes (3 × 15 mL). The combined organic layers were washed with saturated aqueous NaCl (25 mL). The resultant organic phase was dried with Na<sub>2</sub>SO<sub>4</sub> and filtered. The filtrate was concentrated *in vacuo* to afford unpurified **S4** as a pink oil. Purification by flash chromatography (hexanes to 15:85 EtOAc/hexanes) provided **S4** as a colorless oil (2.44 g, 86%). Spectral data were identical to those reported in literature:<sup>7</sup> <sup>1</sup>H NMR (CDCl<sub>3</sub>, 400 MHz) δ 7.59 (m, 2H), 7.38 (m, 3H), 5.96–5.86 (ddt, *J* = 17.1, 10.3, 4.9, 1H), 5.26 (ddd, *J* = 17.1, 3.6, 1.8, 1H), 5.09 (ddd, *J* = 10.4, 3.3, 1.6, 1H), 4.15 (ddd, *J* = 4.9, 1.6, 1.6, 2H), 0.40 (s, 6H); <sup>13</sup>C NMR (CDCl<sub>3</sub>, 125 MHz) δ 137.9, 137.2, 133.7, 129.9, 128.1, 114.9, 64.3, –1.48; IR (thin film) 3070, 2960, 1428, 1252 cm<sup>–1</sup>.

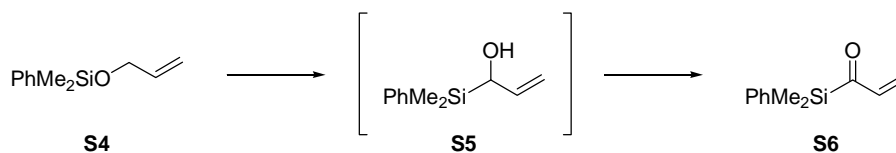

**Acyl Silane S6.** To a cooled (–78 °C) solution of **S4** (8.00 g, 41.6 mmol), and LiCl (5.30 g, 125 mmol) in THF (200 mL) was added *s*-BuLi (93.8 mL, 1.30 M in 92:8 cyclohexane/hexanes, 125 mmol). The reaction mixture was stirred at –78 °C for 45 min. The reaction mixture was poured onto a vigorously stirring saturated solution of aqueous NH<sub>4</sub>Cl (1200 mL). The layers were separated, and the aqueous layer was extracted with EtOAc (3 × 200 mL). The combined organic layers were washed with saturated aqueous NaCl (150 mL). The resultant organic phase was dried with Na<sub>2</sub>SO<sub>4</sub> and filtered. The filtrate was concentrated *in vacuo* to afford α-hydroxy allylic silane **S5** as a yellow oil. Spectral data were identical to those reported in literature:<sup>8</sup> <sup>1</sup>H NMR (CDCl<sub>3</sub>, 500 MHz) δ 7.57 (m, 2H), 7.38 (m, 3H), 6.00 (ddd, *J* = 17.1, 10.7, 5.3, 1H), 5.06 (ddd, *J* = 17.2, 1.7, 1.7, 1H), 5.00 (ddd, *J* = 10.7, 1.7, 1.7, 1H), 4.22 (ddd, *J* = 5.3, 2.0, 2.0, 1H), 0.35 (s, 3H), 0.33 (s, 3H); <sup>13</sup>C NMR (CDCl<sub>3</sub>, 125 MHz) δ 139.5, 136.2, 134.3, 129.6, 128.0, 110.2, 68.6, –5.6, –5.9; HRMS (ESI) *m/z* calcd for C<sub>11</sub>H<sub>16</sub>NaOSi (M + Na)<sup>+</sup> 215.0868, found 215.0870.

In a separate flask, to a solution of trifluoroacetic anhydride (8.70 mL, 62.4 mmol) in CH<sub>2</sub>Cl<sub>2</sub> (80 mL) was cooled to –78 °C as a solution of DMSO (5.90 mL, 83.2 mmol) in CH<sub>2</sub>Cl<sub>2</sub> (60 mL) was added dropwise. After stirring for 30 minutes at –78 °C, a solution of α-hydroxy allylic silane **S5** in CH<sub>2</sub>Cl<sub>2</sub> (80 mL) was added over 30 min. After stirring for 1 h at –78 °C, triethylamine (17.4 mL, 125 mmol) was added dropwise. The solution was stirred at –78 °C for 1 h. The reaction mixture was diluted with H<sub>2</sub>O (150 mL) and warmed to 24 °C. The layers were separated and the aqueous layer was extracted with CH<sub>2</sub>Cl<sub>2</sub> (3 × 50 mL). The combined organic layers were washed with saturated aqueous NaCl (200 mL). The resultant organic phase was dried over MgSO<sub>4</sub> and filtered. The filtrate was concentrated *in vacuo* to afford unpurified **S6** as a yellow oil. Purification by flash chromatography (5:95 to 10:90 EtOAc/hexanes) provided **S6** as a vibrant yellow oil (7.00 g, 89%). Spectral data were identical to those reported in literature:<sup>8</sup> <sup>1</sup>H NMR (CDCl<sub>3</sub>, 500 MHz) δ 7.55 (m, 2H), 7.40 (m, 3H), 6.41 (dd, *J* = 17.9, 10.8, 1H), 5.98 (d, *J* = 17.9, 1H), 5.87 (d, *J* = 10.8, 1H), 0.53 (s, 6H); <sup>13</sup>C NMR (CDCl<sub>3</sub>, 125 MHz) δ 236.0, 141.3, 135.3, 134.1, 130.0, 129.7, 128.4, –3.6; IR (thin film) 2962, 1638, 1598, 1430, 1250 cm<sup>–1</sup>; HRMS (ESI) *m/z* calcd for C<sub>11</sub>H<sub>14</sub>NaOSi (M + Na)<sup>+</sup> 213.0712, found 213.0708.

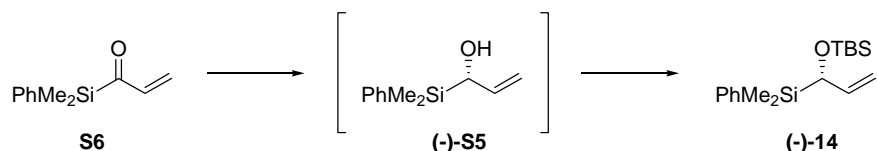

**Allylic Silane (–)-14.** To a cooled ( $-78\text{ }^\circ\text{C}$ ) solution of (+)-diisopinocampheylchloroborane (11.33 g, 35.31 mmol) in THF (30 mL) was added a solution of **S6** (5.60 g, 29.4 mmol) in THF (30 mL). The reaction mixture was warmed to  $24\text{ }^\circ\text{C}$  and stirred for 60 h. Acetaldehyde (3.30 mL, 58.8 mmol) was added, and the reaction was stirred at  $24\text{ }^\circ\text{C}$  for 2.5 h. The reaction mixture was concentrated *in vacuo*, and the residual pinene was removed under reduced pressure ( $\sim 0.1$  Torr). The resulting slurry was dissolved in  $\text{Et}_2\text{O}$  (200 mL) and diethanolamine (11.3 mL, 118 mmol) was added. The reaction mixture was stirred at  $24\text{ }^\circ\text{C}$  for 20 h. The resulting suspension was filtered through Celite<sup>®</sup>, and the solids were washed with  $\text{Et}_2\text{O}$ . The filtrate was concentrated *in vacuo* to afford  $\alpha$ -hydroxy allylic silane (–)-**S5** as a clear oil.  $\alpha$ -Hydroxy allylic silane (–)-**S5** was isolated in 93% *ee* by chiral HPLC (Chiralcel OD-H column, 99.5:0.5 hexanes/IPA, 1 mL/min, 220/254 nm),  $[\alpha]_D^{23} -10.5$  (*c* 0.50,  $\text{CHCl}_3$ ). Spectral data for (–)-**S5** were identical to those reported in literature.<sup>8</sup>  $\alpha$ -Hydroxy allylic silane (–)-**S5** was dissolved in DMF (60 mL) and stirred at  $24\text{ }^\circ\text{C}$  as TBDMSCl (8.87 g, 58.8 mmol) and imidazole (3.00 g, 44.1 mmol) were added. The reaction mixture was stirred at  $24\text{ }^\circ\text{C}$  for 18 h. The reaction mixture was diluted with saturated aqueous  $\text{NH}_4\text{Cl}$  (100 mL) and hexanes (50 mL). The layers were separated and aqueous layer was extracted with hexanes ( $3 \times 30$  mL). The combined organic layers were washed with saturated aqueous  $\text{NaCl}$  (50 mL). The resultant organic phase was dried with  $\text{MgSO}_4$  and filtered. The filtrate was concentrated *in vacuo* to afford unpurified (–)-**14** as a colorless oil. Purification by flash chromatography (hexanes) provided (–)-**14** as a colorless oil (8.34 g, 93%). Spectral data were identical to those reported in literature:<sup>9</sup>  $^1\text{H}$  NMR ( $\text{CDCl}_3$ , 400 MHz)  $\delta$  7.53 (m, 2H), 7.34 (m, 3H), 5.83 (ddd,  $J = 17.1, 10.6, 5.3$ , 1H), 5.02 (d,  $J = 17.0$ , 1H), 4.89 ( $J = 10.6$ , 1H), 4.12 (d,  $J = 5.2$ , 1H), 0.87 (s, 9H), 0.31 (s, 3H), 0.27 (s, 3H),  $-0.06$  (s, 3H),  $-0.15$  (s, 3H);  $^{13}\text{C}$  NMR ( $\text{CDCl}_3$ , 125 MHz)  $\delta$  139.4, 137.2, 134.5, 129.3, 127.7, 110.4, 68.9, 26.0, 18.4,  $-4.4$ ,  $-5.2$ ,  $-5.7$ ,  $-5.8$ ; IR (thin film) 2958, 2858, 1252  $\text{cm}^{-1}$ ; Anal. Calcd for  $\text{C}_{17}\text{H}_{30}\text{OSi}_2$ : C, 66.60; H, 9.86. Found: C, 66.70; H, 10.01.  $[\alpha]_D^{23} -7.0$  (*c* 0.35,  $\text{CHCl}_3$ ).

### III. [3+2] Cycloaddition of $\alpha$ -Silyloxy Allylic Silanes and Chlorosulfonyl Isocyanate

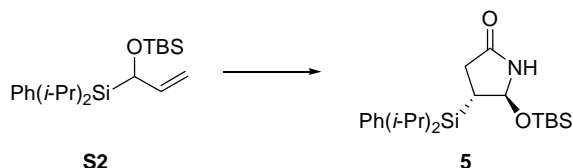

**$\gamma$ -Lactam 5.** To a cooled ( $0\text{ }^\circ\text{C}$ ) solution of  $\alpha$ -silyloxy allylic silane **S2** (0.750 g, 2.07 mmol) in  $\text{CH}_2\text{Cl}_2$  (15 mL) was added chlorosulfonyl isocyanate (0.27 mL, 3.1 mmol). The reaction mixture was stirred at  $0\text{ }^\circ\text{C}$  for 1 h. The reaction mixture was diluted with saturated aqueous  $\text{NaHCO}_3$  (5 mL), and the  $\text{CH}_2\text{Cl}_2$  removed *in vacuo*. The resultant aqueous layer was diluted with saturated aqueous  $\text{NH}_4\text{Cl}$  (10 mL) and  $\text{EtOAc}$  (10 mL). The layers were separated, and the aqueous layer was extracted with  $\text{EtOAc}$  ( $3 \times 5$  mL). The combined organic layers were washed with saturated aqueous  $\text{NaCl}$  (15 mL). The resultant organic phase was dried over  $\text{Na}_2\text{SO}_4$  and filtered. The filtrate was concentrated *in vacuo* to afford the *N*-chlorosulfonyl  $\gamma$ -lactam as a clear oil. The *N*-chlorosulfonyl  $\gamma$ -lactam was dissolved in toluene (30 mL) and cooled to  $-78\text{ }^\circ\text{C}$  Red-Al<sup>®</sup> (0.95 mL, 65 % w/w solution in toluene, 3.1 mmol) was added dropwise. After 1 h, the reaction mixture was diluted with water (0.62 mL), and stirred at  $24\text{ }^\circ\text{C}$  for 1 h. The resultant slurry was filtered, and the solids washed with toluene (10 mL). The filtrate was concentrated *in vacuo*, to afford unpurified **5** as a white slurry. Purification by flash chromatography (30:70  $\text{EtOAc}$ /hexanes) provided **5** as a white solid (0.465 g, 55%,  $>95:5$  diastereomer ratio as determined by  $^1\text{H}$  NMR spectroscopy): mp  $131\text{--}134\text{ }^\circ\text{C}$ ;  $^1\text{H}$  NMR ( $\text{CDCl}_3$ , 400 MHz)  $\delta$  7.48 (m, 2H), 7.38 (3H), 6.01 (br s, 1H), 5.35 (s, 1H), 2.82 (dd,  $J = 17.6, 11.0$ , 1H), 2.26 (dd,  $J = 17.6, 4.6$ , 1H), 2.16 (ddd,  $J = 11.0, 4.6, 2.0$ , 1H), 1.34–1.45 (m, 2H), 1.08 (m, 12H), 0.88 (s, 9H), 0.04 (s, 3H), 0.01 (s, 3H);  $^{13}\text{C}$  NMR ( $\text{CDCl}_3$ , 100 MHz)  $\delta$  178.5, 135.1, 132.9, 129.5, 128.1, 82.0, 31.0, 28.5, 25.8, 18.4, 18.3, 17.8, 10.9, 10.8,  $-4.0$ ,  $-4.6$ ; IR (thin film) 3199, 1702  $\text{cm}^{-1}$ ; HRMS (ESI)  $m/z$  calcd for  $\text{C}_{22}\text{H}_{39}\text{NNaO}_2\text{Si}_2$  ( $M + \text{Na}$ )<sup>+</sup> 428.2417, found 428.2404. Anal. Calcd for  $\text{C}_{22}\text{H}_{39}\text{NO}_2\text{Si}_2$ : C, 65.13; H, 9.69. Found: C, 65.19; H, 9.81.

**Lactam 7.** To a cooled (−78 °C) solution of lactam **2** (0.100 g, 0.231 mmol) in THF (2 mL) was added allylmagnesium chloride (0.35 mL, 0.69 mmol). The reaction mixture was warmed to 24 °C over 2 h. After stirring for 3 h at 24 °C, the reaction mixture was cooled to 0 °C, and saturated aqueous NH<sub>4</sub>Cl (10 mL) was added dropwise. The layers were separated, and the aqueous layer was extracted with EtOAc (3 × 10 mL). The combined organic layers were washed with saturated aqueous NaCl (15 mL). The resultant organic phase was dried with MgSO<sub>4</sub> and filtered. The filtrate was concentrated *in vacuo* to afford unpurified **7** as a colorless oil. Purification by flash chromatography (20:80 to 40:60 EtOAc/hexanes) provided **7** as a white solid (0.065 g, 82%, >95:5 diastereomer ratio as determined by <sup>1</sup>H NMR spectroscopy): mp 131–134 °C; <sup>1</sup>H NMR (CDCl<sub>3</sub>, 400 MHz) δ 7.51 (m, 2H), 7.37 (m, 3H), 5.68–5.55 (dddd, *J* = 16.9, 10.2, 9.0, 5.1, 1H), 5.49 (br s, 1H), 5.05 (dd, *J* = 10.0, 1.0, 1H), 5.01 (dd, *J* = 16.9, 1.0, 1H), 3.77 (dd, *J* = 11.0, 2.2, 1H), 2.79 (q, *J* = 7.3, 1H), 1.96 (ddd, *J* = 13.8, 5.0, 1.9, 1H), 1.84 (ddd, *J* = 13.8, 11.0, 9.0, 1H), 1.68–1.56 (m, 2H), 1.33 (d, *J* = 7.4, 6H), 1.19 (d, *J* = 7.5, 3H), 1.17 (d, *J* = 7.5, 3H), 1.03 (s, 3H), 1.02 (d, *J* = 7.3, 3H); <sup>13</sup>C NMR (CDCl<sub>3</sub>, 125 MHz) δ 179.2, 135.8, 135.6, 134.6, 129.2, 127.9, 118.0, 57.0, 43.4, 36.6, 32.9, 20.6, 20.5, 19.8, 19.7, 13.7, 11.8, 11.7, 11.6; IR (thin film) 3199, 1696 cm<sup>−1</sup>; HRMS

(ESI)  $m/z$  calcd for  $C_{21}H_{34}NOSi$  ( $M + H$ )<sup>+</sup> 344.2410, found 344.2407. Anal. Calcd for  $C_{21}H_{33}NOSi$ : C, 73.41; H, 9.68. Found: C, 73.16; H, 9.69.

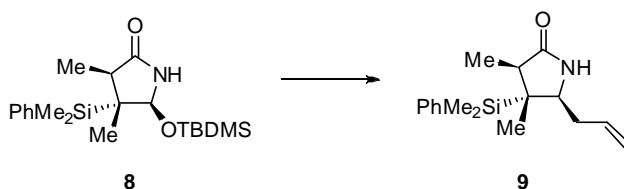

**Lactam 9.** To a cooled (−78 °C) solution of lactam **8**<sup>9</sup> (1.00 g, 2.65 mmol) in toluene (150 mL) was added allylmagnesium chloride (2.92 mL, 5.83 mmol). The reaction mixture was warmed to 24 °C over 12 h. The reaction mixture was cooled to 0 °C and saturated aqueous  $NH_4Cl$  (75 mL) was added. The layers were separated, and the aqueous layer was extracted with EtOAc (3 × 30 mL). The combined organic layers were washed with saturated aqueous NaCl (100 mL). The resultant organic phase was dried with  $MgSO_4$  and filtered. The filtrate was concentrated *in vacuo* to afford unpurified **9** as an 85:15 mixture of diastereomers. Purification by flash chromatography (50:50 EtOAc/hexanes to EtOAc) provided **9** as a clear oil (0.635 g, 83%, 85:15 diastereomer ratio as determined by  $^1H$  NMR spectroscopy):  $^1H$  NMR ( $CDCl_3$ , 500 MHz)  $\delta$  7.50 (m, 2H), 7.40 (m, 3H), 5.65 (m, 1H), 5.46 (br s, 1H), 5.04 (m, 2H), 3.57 (dd,  $J$  = 10.5, 2.7, 1H), 2.57 (q,  $J$  = 7.3, 1H), 1.85 (m, 2H), 1.00 (d,  $J$  = 7.3, 3H), 0.94 (s, 3H), 0.41 (s, 3H), 0.40 (s, 3H);  $^{13}C$  NMR ( $CDCl_3$ , 125 MHz)  $\delta$  179.0, 136.3, 135.5, 134.4, 129.8, 128.2, 118.0, 56.5, 43.4, 36.0, 32.3, 11.3, 10.6, −4.5, −4.7; IR (thin film) 3205, 1698, 1428, 1252  $cm^{-1}$ ; HRMS (ESI)  $m/z$  calcd for  $C_{17}H_{25}NNaOSi$  ( $M + Na$ )<sup>+</sup> 310.1603, found 310.1601.

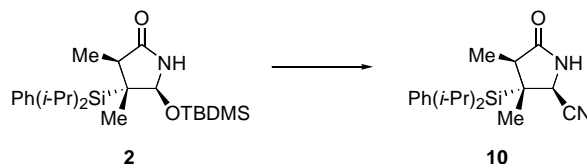

**Nitrile 10.** To a solution of **2** (2.00 g, 4.61 mmol) in toluene (10 mL) was added  $Et_2AlCN$  (23.0 mL, 1.0 M in toluene, 23 mmol). The reaction mixture was heated at 50 °C for 24 h. The reaction mixture was cooled to 0 °C and a 1 N solution of aqueous HCl (20 mL) was added. The layers were separated and the aqueous layer was extracted with EtOAc (3 × 15 mL). The combined organic layers were washed with saturated aqueous NaCl (25 mL). The resultant organic phase was dried with  $MgSO_4$  and filtered. The filtrate was concentrated *in vacuo* to afford unpurified **10** as a viscous oil. Purification by flash chromatography (30:70 to 50:50 EtOAc/hexanes) provided **10** as a white foam (1.26 g, 84%, >95:5 diastereomer ratio as determined by  $^1H$  NMR spectroscopy):  $^1H$  NMR ( $CDCl_3$ , 400 MHz)  $\delta$  7.49 (m, 2H), 7.39 (m, 3H), 7.21 (br s, 1H), 4.56 (s, 1H), 2.61 (q,  $J$  = 7.4, 1H), 1.64 (m, 2H), 1.37 (s, 3H), 1.34 (d,  $J$  = 7.4, 3H), 1.32 (d,  $J$  = 7.4, 3H), 1.21 (d,  $J$  = 7.5, 3H), 1.16 (d,  $J$  = 7.6, 3H), 1.05 (d,  $J$  = 7.4, 3H);  $^{13}C$  NMR ( $CDCl_3$ , 100 MHz)  $\delta$  180.2, 135.6, 132.7, 130.0, 128.5, 117.4, 50.8, 42.0, 32.5, 20.4, 19.6, 19.5, 16.8, 11.7, 11.5, 11.4; IR (thin film) 3207, 1706  $cm^{-1}$ ; HRMS (ESI)  $m/z$  calcd for  $C_{19}H_{29}N_2OSi$  ( $M + H$ )<sup>+</sup> 329.2049, found 329.2044.

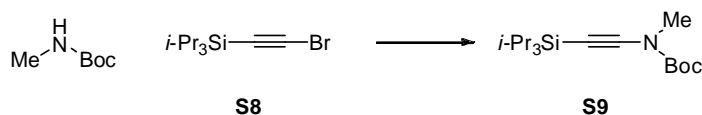

**Alkynylamide S9.** A suspension of *tert*-butyl-*N*-methylcarbamate<sup>10</sup> (4.00 g, 15.2 mmol), **S8**<sup>11</sup> (2.00 g, 15.3 mmol),  $CuSO_4 \cdot 5H_2O$  (0.373 g, 1.53 mmol),  $K_3PO_4$  (6.47 g, 30.5 mmol) and 1,10-phenanthroline (0.550 g, 3.05 mmol) in toluene (15 mL) was stirred at 80 °C for 60 h. The reaction mixture was filtered through Celite® and the solids were washed the hexanes. The filtrate was concentrated *in vacuo* to afford unpurified **S9** as a brown oil. Purification by flash chromatography (5:95 to 15:85 EtOAc/hexanes) provided **S9** as a colorless oil (3.10 g, 65%):  $^1H$  NMR ( $CDCl_3$ , 400 MHz)  $\delta$  3.11 (s, 3H), 1.48 (s, 9H), 1.07 (s, 21H);  $^{13}C$  NMR ( $CDCl_3$ , 125 MHz)  $\delta$  154.7, 99.3, 66.5, 37.4, 28.3, 18.8, 11.6; IR (thin film) 2943, 2865, 1725, 1465  $cm^{-1}$ ; HRMS (ESI)  $m/z$  calcd for  $C_{17}H_{33}NNaO_2Si$  ( $M + Na$ )<sup>+</sup> 334.2178, found 334.2177. Anal. Calcd for  $C_{17}H_{33}NO_2Si$ : C, 65.54; H, 10.68. Found: C, 65.64; H, 10.72.

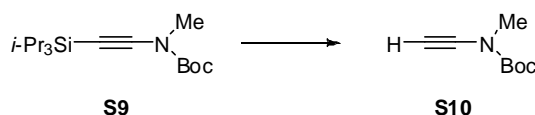

**Alkynylamide S10.** To a cooled (0 °C) solution of **S9** (3.00 g, 9.63 mmol) in THF (70 mL) was added *t*-Bu<sub>4</sub>NF (10.60 mL, 1.0 M in THF, 11 mmol). The reaction mixture was stirred at 24 °C for 45 min. The reaction mixture was poured into H<sub>2</sub>O (50 mL) and the layers were separated. The aqueous layer was extracted with pentane (3 × 30 mL). The combined organic layers were washed with

C#CN(C)C(=O)OC(C)(C)C (S10) + CC1(C)NC(=O)C(C1)OSi(C)(C)C2=CC=CC=C2C3=CC=CC=C3 (8) → CC1(C)NC(=O)C(C1)C#CC(C)N(C)C(=O)OC(C)(C)C (11)

Chemical reaction scheme showing the synthesis of compound **12** from S11 and **2**.

Reactants:

- S11:  $\text{CH}_3\text{C}\equiv\text{CCN}(\text{Bu})_2$
- 2**: A substituted pyrrolidin-2-one with a methyl group, a  $\text{PhMe}_2\text{SiMe}$  group, and an  $\text{OTBDMS}$  group.

Product:

- 12**: A substituted pyrrolidin-2-one where the  $\text{OTBDMS}$  group has been replaced by the  $\text{CH}_3\text{C}\equiv\text{CCN}(\text{Bu})_2$  group.

**S12** **S13**

**Alkyne S13.** To a suspension of **S12**<sup>13</sup> (7.30 g, 32.5 mmol) and K<sub>2</sub>CO<sub>3</sub> (6.75 g, 48.8 mmol) in DMF (15 mL) was added dibenzylamine (9.40 mL, 48.8 mmol). The resulting suspension was heated at 50 °C for 36 h. The reaction mixture was cooled to 24 °C and diluted with saturated aqueous ammonium chloride (50 mL). The resulting heterogeneous mixture was extracted with EtOAc (3 × 30 mL). The combined organic layers were washed with saturated aqueous NaCl (40 mL). The resultant organic phase was dried with MgSO<sub>4</sub> and filtered. The filtrate was concentrated *in vacuo* to afford unpurified **S13** as a yellow oil. Purification by flash

chromatography (10:90 EtOAc/hexanes) provided **S13** as a colorless oil (5.63 g, 69%):  $^1\text{H}$  NMR ( $\text{CDCl}_3$ , 400 MHz)  $\delta$  7.38 (m, 4H), 7.30 (m, 4H), 7.23 (m, 2H), 3.62 (s, 4H), 2.70 (t,  $J = 7.2$ , 2H), 2.35 (dt,  $J = 7.2$ , 2.6, 2H), 1.93 (t,  $J = 2.6$ , 1H);  $^{13}\text{C}$  NMR ( $\text{CDCl}_3$ , 100 MHz)  $\delta$  139.6, 128.8, 128.4, 127.1, 83.2, 69.2, 58.2, 52.2, 17.2; IR (thin film)  $3299\text{ cm}^{-1}$ ; HRMS (ESI)  $m/z$  calcd for  $\text{C}_{18}\text{H}_{20}\text{N}$  ( $\text{M} + \text{H}$ ) $^+$  250.1596, found 250.1592. Anal. Calcd for  $\text{C}_{18}\text{H}_{19}\text{N}$ : C, 86.70; H, 7.68. Found: C, 86.48; H, 7.68.

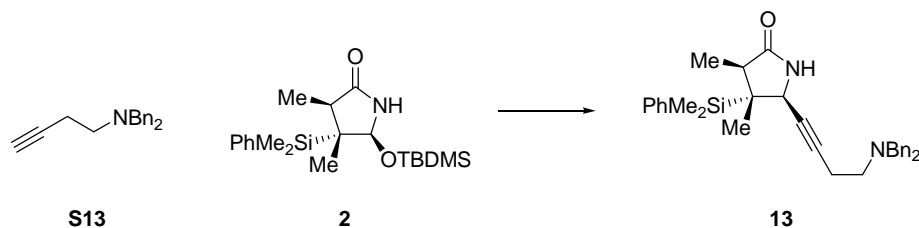

**$\gamma$ -Lactam 13.** To a cooled ( $-42\text{ }^\circ\text{C}$ ) solution of **S13** (0.576 g, 2.31 mmol) in toluene (4 mL) was added  $n\text{-BuLi}$  (0.93 mL, 2.60 M in hexanes, 2.42 mmol). After 15 min,  $\text{Me}_2\text{AlCl}$  (2.31 mL 1.0 M in hexanes, 2.3 mmol) was added, and the reaction mixture was warmed to  $0\text{ }^\circ\text{C}$ . After 15 min, a solution of **2** (0.200 g, 0.460 mmol) in toluene (6 mL) was added, and the resulting solution was heated to  $50\text{ }^\circ\text{C}$  for 5 h. The reaction mixture was cooled to  $24\text{ }^\circ\text{C}$  and diluted with saturated aqueous sodium potassium tartrate (20 mL). The layers were separated, and the aqueous layer was extracted with EtOAc ( $3 \times 15\text{ mL}$ ). The combined organic layers were washed with saturated aqueous NaCl (20 mL). The resultant organic phase was dried with  $\text{MgSO}_4$  and filtered. The filtrate was concentrated *in vacuo* to afford unpurified **13** as a yellow oil. Purification by flash chromatography (20:80 to 40:60 EtOAc/hexanes) provided **13** as a white solid (0.229 g, 90%, >95:5 diastereomer ratio as determined by  $^1\text{H}$  NMR spectroscopy): mp  $147\text{--}149\text{ }^\circ\text{C}$ ;  $^1\text{H}$  NMR ( $\text{CDCl}_3$ , 400 MHz)  $\delta$  7.48 (m, 2H), 7.40–7.30 (m, 11H), 7.25 (m, 2H), 5.21 (br s, 1H), 4.45 (s, 1H), 3.61 (s, 4H), 2.64 (t,  $J = 7.3$ , 2H), 2.49 (q,  $J = 7.2$ , 1H), 2.35 (dt,  $J = 7.3$ , 1.8, 2H), 1.71–1.58 (m, 2H), 1.32 (d,  $J = 6.4$ , 3H), 1.30 (d,  $J = 7.2$ , 3H), 1.19 (s, 3H), 1.16 (d,  $J = 7.6$ , 3H), 1.12 (d,  $J = 7.5$ , 3H), 0.95 (d,  $J = 7.3$ , 3H);  $^{13}\text{C}$  NMR ( $\text{CDCl}_3$ , 125 MHz)  $\delta$  178.9, 139.5, 135.8, 134.2, 129.2, 128.8, 128.4, 128.0, 127.1, 85.8, 77.7, 58.3, 52.2, 50.7, 42.7, 34.9, 20.6, 19.8, 19.7, 17.5, 15.4, 11.9, 11.8, 11.2; IR (thin film)  $3205$ ,  $1698\text{ cm}^{-1}$ ; HRMS (ESI)  $m/z$  calcd for  $\text{C}_{36}\text{H}_{47}\text{N}_2\text{OSi}$  ( $\text{M} + \text{H}$ ) $^+$  551.3458, found 551.3445. Anal. Calcd for  $\text{C}_{36}\text{H}_{46}\text{N}_2\text{OSi}$ : C, 78.49; H, 8.42. Found: C, 78.24; H, 8.42.

## V. Stereochemistry and Structural Proofs

### A. Stereoselectivity of $N,O$ -acetal substitution

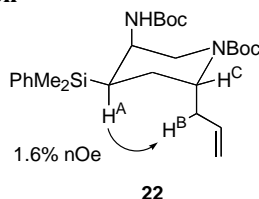

Piperidine **22**.

nOe experiment was performed for **22** using a pure sample.

$\text{H}^{\text{A}}$  irradiated:  $\text{H}^{\text{B}}$  (1.6%),  $\text{H}^{\text{C}}$  (0%)

Note: The observation on nOe between  $\text{H}^{\text{A}}$  and  $\text{H}^{\text{B}}$  and the absence of nOe between  $\text{H}^{\text{A}}$  and  $\text{H}^{\text{C}}$  suggests a 1,3 trans conformation.

### B. Proof of Translactamization versus Acyl-transfer

$\delta$ -Lactam **S17** was formed by reduction and translactamization of azide **S16**.  $\gamma$ -Lactam **S19** was formed by the reduction of  $\gamma$ -lactam **S18** (translactamization does not occur when the lactam nitrogen is not activated). The amine of lactam **S19** was protected as the toluenesulfonate amide (**S21**), and its structure confirmed by X-ray crystallography (See Section XII for crystallographic data). The amine of lactam **S19** was protected as the *tert*-butyl carbamate (**S22**), which would be the product of acyl-transfer upon reduction of azide **S16**. The spectral data of the isolated  $\delta$ -lactam (**S17**) and  $\gamma$ -lactam **S22** do not match, thus confirming translactamization as the major reaction pathway.



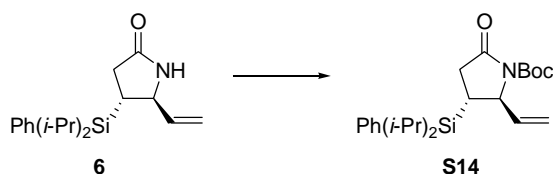

**Alkene S14.** To a solution of **6** (0.215 g, 0.713 mmol) and DMAP (0.105 g, 0.856 mmol) in MeCN (20 mL) at 24 °C was added di-*tert*-butyl dicarbonate (0.33 mL, 1.4 mmol). The reaction mixture was stirred at 24 °C for 3 h. The reaction mixture was diluted with saturated aqueous NH<sub>4</sub>Cl (30 mL). The layers were separated, and the aqueous layer was extracted with EtOAc (3 × 15 mL). The combined organic layers were washed with saturated aqueous NaCl (40 mL). The resultant organic phase was dried with Na<sub>2</sub>SO<sub>4</sub> and filtered. The filtrate was concentrated *in vacuo* to afford unpurified **S14** as a yellow oil. Purification by flash chromatography (10:90 to 50:50 EtOAc/hexanes) provided **S14** as a white solid (0.268 g, 94%, >95:5 diastereomer ratio as determined by <sup>1</sup>H NMR spectroscopy): mp 80–82 °C; <sup>1</sup>H NMR (CDCl<sub>3</sub>, 400 MHz) δ 7.46 (m, 2H), 7.38 (m, 3H), 5.86 (ddd, *J* = 16.8, 10.3, 7.0, 1H), 5.14 (d, *J* = 10.3, 1H), 5.11 (d, *J* = 16.8, 1H), 4.56 (dd, *J* = 7.0, 3.0, 1H), 2.87 (dd, *J* = 18.1, 11.3, 1H), 2.46 (dd, *J* = 18.1, 4.0, 1H), 1.80 (ddd, *J* = 11.2, 3.9, 3.1, 1H), 1.52–1.42 (m, 2H), 1.43 (s, 9H), 1.09 (m, 12H); <sup>13</sup>C NMR (CDCl<sub>3</sub>, 125 MHz) δ 174.3, 149.6, 138.1, 135.0, 132.3, 129.7, 128.2, 115.3, 82.8, 61.4, 33.5, 28.0, 19.8, 18.4, 18.3, 18.2, 18.1, 10.6, 10.5; IR (thin film) 1785, 1750, 1719 cm<sup>-1</sup>; HRMS (ESI) *m/z* calcd for C<sub>23</sub>H<sub>35</sub>NNaO<sub>3</sub>Si (M + Na)<sup>+</sup> 424.2284, found 424.2293. Anal. Calcd for C<sub>23</sub>H<sub>35</sub>NO<sub>3</sub>Si: C, 68.78; H, 8.78. Found: C, 68.88; H, 8.83.

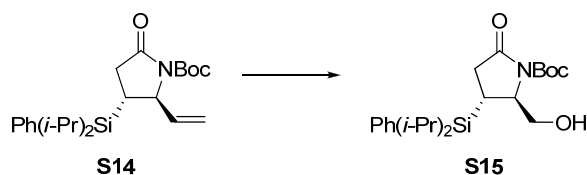

**Alcohol S15.** To a cooled (–78 °C) solution of **S14** (0.300 g, 0.747 mmol) in MeOH (8 mL) was bubbled ozone. When the solution became bright blue, oxygen was bubbled through the solution until it became clear. Sodium borohydride (0.085 g, 2.2 mmol) was added, and the reaction mixture warmed to 0 °C. The reaction mixture was stirred at 0 °C for 30 minutes. The reaction mixture was diluted with H<sub>2</sub>O (10 mL) and EtOAc (10 mL). The layers were separated, and the aqueous layer was extracted with EtOAc (3 × 10 mL). The combined organic layers were washed with saturated aqueous NaCl (20 mL). The resultant organic phase was dried with MgSO<sub>4</sub> and filtered. The filtrate was concentrated *in vacuo* to afford unpurified **S15** as a white solid. Purification by flash chromatography (30:70 to 70:30 EtOAc/hexanes) provided **S15** as a white solid (0.300 g, 99%, >95:5 diastereomer ratio as determined by <sup>1</sup>H NMR spectroscopy): mp 128–131 °C; <sup>1</sup>H NMR (CDCl<sub>3</sub>, 400 MHz) δ 7.46 (m, 2H), 7.36 (m, 3H), 4.21 (m, 1H), 3.91 (ddd, *J* = 11.6, 5.5, 3.4, 1H), 3.65 (ddd, *J* = 11.6, 6.7, 3.9, 1H), 3.03 (dd, *J* = 18.3, 11.8, 1H), 2.80 (dd, *J* = 3.9, 3.4, 1H), 2.41 (dd, *J* = 18.3, 3.3, 1H), 2.04 (m, 1H), 1.48–1.40 (m, 2H), 1.46 (s, 9H), 1.08 (m, 12H); <sup>13</sup>C NMR (CDCl<sub>3</sub>, 125 MHz) δ 175.4, 150.2, 134.9, 132.5, 129.6, 128.2, 83.1, 65.7, 61.3, 34.7, 28.1, 18.4, 18.3, 18.2, 18.1, 15.6, 10.5, 10.4; IR (thin film) 3450, 1775, 1719 cm<sup>-1</sup>; HRMS (ESI) *m/z* calcd for C<sub>22</sub>H<sub>35</sub>NNaO<sub>4</sub>Si (M + Na)<sup>+</sup> 428.2233, found 428.2229. Anal. Calcd for C<sub>22</sub>H<sub>35</sub>NO<sub>4</sub>Si: C, 65.15; H, 8.70. Found: C, 65.14; H, 8.73.

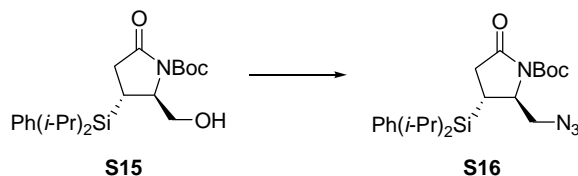

**Azide S16.** To a solution of **S15** (1.46 g, 3.60 mmol), toluenesulfonyl chloride (0.824 g, 4.32 mmol), and DMAP (0.484 g, 3.96 mmol) in CH<sub>2</sub>Cl<sub>2</sub> (20 mL) at 24 °C was added Et<sub>3</sub>N (1.00 mL, 7.20 mmol). The reaction mixture was stirred at 24 °C for 12 h. The reaction mixture was concentrated *in vacuo*, and diluted with saturated aqueous NH<sub>4</sub>Cl (20 mL) and EtOAc (20 mL). The layers were separated, and the aqueous layer was extracted with EtOAc (3 × 15 mL). The combined organic layers were washed with saturated aqueous NaCl (30 mL). The resultant organic phase was dried with MgSO<sub>4</sub> and filtered. The filtrate was concentrated *in vacuo* to afford unpurified **S16** as a yellow oil. Purification by flash chromatography (15:85 to 50:50 EtOAc/hexanes) provided **S16** as a white solid (1.31 g, 85%, >95:5 diastereomer ratio as determined by <sup>1</sup>H NMR spectroscopy): mp 82–84 °C; <sup>1</sup>H NMR (CDCl<sub>3</sub>, 500 MHz) δ 7.46 (m, 2H), 7.38 (m, 3H), 4.24 (m, 1H), 3.66 (dd, *J* = 12.3, 5.4, 1H), 3.46 (dd, *J* = 12.3, 2.8, 1H), 2.99 (dd, *J* = 18.3, 11.7, 1H), 2.45 (dd, *J* = 18.3, 3.1, 1H), 1.93 (m, 1H), 1.51–1.40 (m, 2H), 1.47 (s, 9H), 1.11 (s, 6H), 1.09 (s, 6H); <sup>13</sup>C NMR (CDCl<sub>3</sub>, 125 MHz) δ 173.7, 149.8, 134.8,

132.1, 129.8, 128.3, 83.5, 58.3, 54.9, 33.9, 28.1, 18.4, 18.3, 18.2, 18.1, 16.6, 10.5, 10.3; IR (thin film) 2113, 1789, 1752, 1713  $\text{cm}^{-1}$ ; HRMS (ESI)  $m/z$  calcd for  $\text{C}_{22}\text{H}_{34}\text{N}_4\text{NaO}_3\text{Si}$  ( $\text{M} + \text{Na}$ )<sup>+</sup> 453.2298, found 453.2303. Anal. Calcd for  $\text{C}_{22}\text{H}_{34}\text{N}_4\text{O}_3\text{Si}$ : C, 61.36; H, 7.96. Found: C, 61.69; H, 7.79.

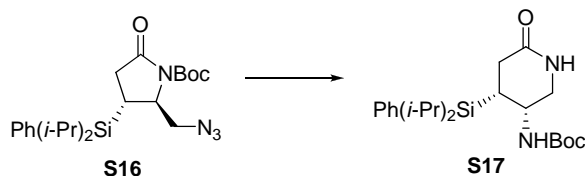

**$\delta$ -Lactam S17.** A suspension of **S16** (0.475 g, 1.17 mmol) and 10% Pd/C (0.117 g) in MeOH (23 mL) at 24°C was stirred under an atmosphere of  $\text{H}_2$  for 18 hr. The reaction mixture was filtered through Celite® and concentrated *in vacuo* to afford a colorless oil. The oil was dissolved in toluene (60 mL) and acetic acid (0.03 mL, 0.6 mmol) was added. The reaction mixture was heated at reflux for 24 h. The reaction mixture was concentrated *in vacuo* to afford unpurified **S17** as an orange oil. Purification by flash chromatography (EtOAc) provided **S17** as a white foam (0.346 g, 73%, >95:5 diastereomer ratio as determined by  $^1\text{H}$  NMR spectroscopy):  $^1\text{H}$  NMR ( $\text{CDCl}_3$ , 400 MHz)  $\delta$  7.49 (m, 2H), 7.38 (m, 3H), 5.92 (br s, 1H), 4.75 (br s, 1H), 3.80 (m, 1H), 3.22–3.05 (m, 2H), 2.60 (dd,  $J = 17.5$ , 11.1, 1H), 2.36 (dd,  $J = 17.5$ , 7.5, 1H), 1.90 (m, 1H), 1.51–1.38 (m, 2H), 1.44 (s, 9H), 1.11 (m, 12H). HRMS (ESI)  $m/z$  calcd for  $\text{C}_{22}\text{H}_{37}\text{N}_2\text{O}_3\text{Si}$  ( $\text{M} + \text{H}$ )<sup>+</sup> 405.2574, found 405.2577.

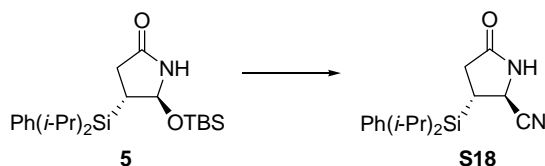

**Nitrile S18.** To a cooled ( $-78^\circ\text{C}$ ) solution of **5** (1.10 g, 2.71 mmol) and  $\text{Me}_3\text{SiCN}$  (1.10 mL, 8.13 mmol) in  $\text{CH}_2\text{Cl}_2$  (35 mL) was added  $\text{BF}_3 \cdot \text{OEt}_2$  (0.68 mL, 5.4 mmol). The reaction was warmed to  $24^\circ\text{C}$  over 6 h. The reaction mixture was diluted with saturated aqueous  $\text{NaHCO}_3$  (15 mL), and the  $\text{CH}_2\text{Cl}_2$  removed *in vacuo*. The resultant aqueous layer was diluted with saturated aqueous  $\text{NH}_4\text{Cl}$  (10 mL) and EtOAc (20 mL). The layers were separated, and the aqueous layer was extracted with EtOAc ( $3 \times 15$  mL). The combined organic layers were washed with saturated aqueous  $\text{NaCl}$  (35 mL). The resultant organic phase was dried over  $\text{Na}_2\text{SO}_4$  and filtered. The filtrate was concentrated *in vacuo* to afford unpurified **S18** as a brown oil. Purification by flash chromatography (20:80 to 30:70 EtOAc/hexanes) provided **S18** as a white solid (0.681 g, 84%, >95:5 diastereomer ratio as determined by  $^1\text{H}$  NMR spectroscopy):  $^1\text{H}$  NMR ( $\text{CDCl}_3$ , 400 MHz)  $\delta$  7.47 (m, 2H), 7.42 (m, 3H), 6.40 (br s, 1H), 4.29 (d,  $J = 6.8$ , 1H), 2.70 (dd,  $J = 17.0$ , 10.6, 1H), 2.51 (ddd,  $J = 10.6$ , 7.8, 6.5, 1H), 2.34 (dd,  $J = 17.0$ , 7.8, 1H), 1.54–1.43 (m, 2H), 1.19 (d,  $J = 7.5$ , 3H), 1.16 (d,  $J = 7.5$ , 3H), 1.15 (d,  $J = 7.4$ , 3H), 1.14 (d,  $J = 7.4$ , 3H);  $^{13}\text{C}$  NMR ( $\text{CDCl}_3$ , 100 MHz)  $\delta$  177.5, 135.0, 131.2, 130.3, 128.7, 119.3, 45.2, 31.3, 23.4, 18.7, 18.6, 18.5, 18.4, 11.1, 11.0; IR (thin film) 3218, 1702  $\text{cm}^{-1}$ ; HRMS (ESI)  $m/z$  calcd for  $\text{C}_{17}\text{H}_{24}\text{N}_2\text{ONaSi}$  ( $\text{M} + \text{Na}$ )<sup>+</sup> 323.1555, found 323.1557.

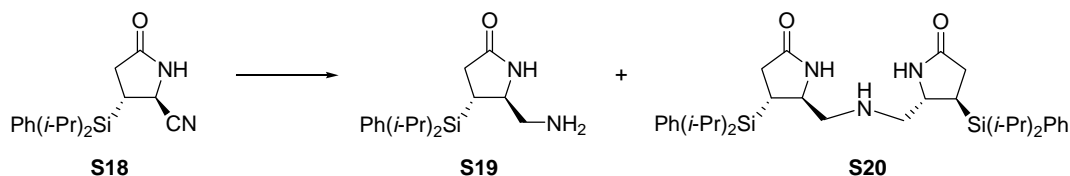

**Amine S19 and Bis-lactam S20.** To a suspension of **S18** (0.100 g, 0.333 mmol) and Pd/C (100 mg) in MeOH (7 mL) was stirred at  $24^\circ\text{C}$  for 6 h. The reaction mixture was filtered through Celite® and concentrated *in vacuo* to provide the unpurified mixture of **S19** and **S20** as a colorless oil. Purification by flash chromatography (EtOAc to 50:50 MeOH/EtOAc) provided **S19** as a white foam (0.040 g, 40%) and **S20** as a white foam (0.030 g, 30%). Spectral data for **S19**:  $^1\text{H}$  NMR ( $\text{CDCl}_3$ , 400 MHz)  $\delta$  7.48 (m, 2H), 7.38 (m, 3H), 6.28 (br s, 1H), 3.71 (m, 1H), 2.86 (dd,  $J = 12.8$ , 3.2, 1H), 2.61 (dd,  $J = 17.4$ , 11.0, 1H), 2.55 (dd,  $J = 12.8$ , 7.9, 1H), 2.38 (dd,  $J = 17.5$ , 7.8, 1H), 1.86 (ddd,  $J = 11.1$ , 7.7, 6.0, 1H), 1.85–1.70 (br s, 2H), 1.51–1.34 (m, 2H), 1.12 (d,  $J = 7.5$ , 3H), 1.11 (d,  $J = 7.5$ , 3H), 1.10 (d,  $J = 7.5$ , 3H), 1.09 (d,  $J = 7.5$ , 3H);  $^{13}\text{C}$  NMR ( $\text{CDCl}_3$ , 100 MHz)  $\delta$  178.7, 135.1, 133.1, 129.5, 128.1, 58.5, 48.1, 33.1, 20.3, 18.61, 18.58, 18.45, 11.2, 10.9; IR (thin film) 3240, 1692  $\text{cm}^{-1}$ ; HRMS (ESI)  $m/z$  calcd for  $\text{C}_{17}\text{H}_{29}\text{N}_2\text{OSi}$  ( $\text{M} + \text{H}$ )<sup>+</sup> 305.2049, found 305.2055. Spectral data for **S20**:  $^1\text{H}$  NMR ( $\text{CDCl}_3$ , 400 MHz)  $\delta$  7.47 (m, 4H), 7.35 (m, 6H), 3.72 (m, 2H), 2.60 (m, 2H), 2.50–2.30 (m, 4H and m, 2H), 1.70 (m, 2H), 1.49–1.38 (m, 2H), 1.42–1.29 (m, 2H), 1.14–1.04 (m, 24H);  $^{13}\text{C}$  NMR ( $\text{CDCl}_3$ , 100 MHz)  $\delta$  178.7, 135.1, 133.4, 129.4, 128.1, 56.4, 55.7, 33.5, 21.3, 18.7, 18.6, 18.5, 11.4, 11.0; IR (thin film) 3238, 1681, 1686  $\text{cm}^{-1}$ ; HRMS (ESI)  $m/z$  calcd for  $\text{C}_{34}\text{H}_{53}\text{N}_3\text{NaO}_2\text{Si}_2$  ( $\text{M} + \text{Na}$ )<sup>+</sup> 614.3574, found 614.3553.

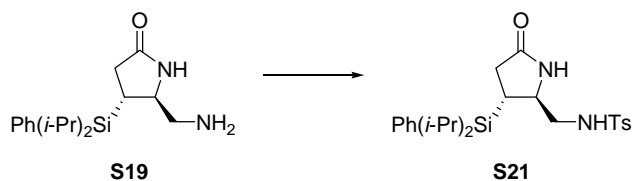

**N-Toluenesulfonamide S21.** To a solution of **S19** (0.080 g, 0.26 mmol) and toluenesulfonyl chloride (0.065 g, 0.34 mmol) in  $\text{CH}_2\text{Cl}_2$  (8 mL) at 24 °C was added  $\text{Et}_3\text{N}$  (0.050 mL, 0.34 mmol). The reaction mixture was stirred at 24 °C for 1 h. The reaction mixture was concentrated *in vacuo*, and diluted with saturated aqueous  $\text{NH}_4\text{Cl}$  (10 mL) and EtOAc (10 mL). The layers were separated, and the aqueous layer was extracted with EtOAc ( $3 \times 10$  mL). The combined organic layers were washed with saturated aqueous NaCl (20 mL). The resultant organic phase was dried with  $\text{MgSO}_4$  and filtered. The filtrate was concentrated *in vacuo* to provide **S21** as a yellow oil. Purification by flash chromatography (80:20 to EtOAc) provided **S21** as a white crystalline solid (0.075 g, 62%):  $^1\text{H}$  NMR ( $\text{CDCl}_3$ , 500 MHz)  $\delta$  7.64 (d,  $J = 8.2$ , 2H), 7.38 (m, 5H), 7.29 (br s, 1H), 7.21 (d,  $J = 8.1$ , 2H), 6.81 (br s, 1H), 3.69 (m, 1H), 2.98 (m, 1H), 2.78 (m, 1H), 2.63 (dd,  $J = 17.8$ , 11.4, 1H), 2.39 (s, 3H), 2.32 (dd,  $J = 17.8$ , 7.2, 1H), 1.84 (m, 1H), 1.42–1.32 (m, 1H), 1.34–1.24 (m, 1H), 1.10–0.98 (m, 12H);  $^{13}\text{C}$  NMR ( $\text{CDCl}_3$ , 125 MHz)  $\delta$  179.3, 143.3, 137.6, 135.1, 132.7, 129.8, 129.5, 128.2, 127.0, 56.5, 49.0, 32.8, 21.6, 19.8, 18.6, 18.5, 18.4, 18.3, 11.0, 10.7; IR (thin film) 3193, 1675, 1404, 1140  $\text{cm}^{-1}$ ; HRMS (ESI)  $m/z$  calcd for  $\text{C}_{24}\text{H}_{34}\text{N}_2\text{NaO}_3\text{SSi}$  ( $\text{M} + \text{Na}$ ) $^+$  481.1957, found 481.1962. Anal. Calcd for  $\text{C}_{24}\text{H}_{34}\text{N}_2\text{O}_3\text{SSi}$ : C, 62.84; H, 7.47. Found: C, 62.92; H, 7.58.

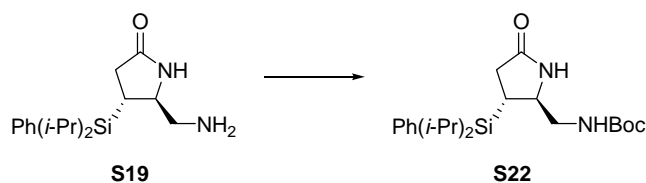

**Lactam S22.** To a solution of **S19** (0.010 g, 0.033 mmol) and DMAP (0.004 g, 0.04 mmol) in MeCN (0.5 mL) at 24 °C was added di-*tert*-butyl dicarbonate (0.01 mL, 0.05 mmol). The reaction mixture was stirred at 24 °C for 1 h. The reaction mixture was diluted with saturated aqueous  $\text{NH}_4\text{Cl}$  (3 mL). The layers were separated, and the aqueous layer was extracted with EtOAc ( $3 \times 5$  mL). The combined organic layers were washed with saturated aqueous NaCl (10 mL). The resultant organic phase was dried with  $\text{Na}_2\text{SO}_4$  and filtered. The filtrate was concentrated *in vacuo* to afford unpurified **S22** as a colorless oil. Purification by flash chromatography (EtOAc) provided **S22** as a white solid (0.003 g, 22%, >95:5 diastereomer ratio as determined by  $^1\text{H}$  NMR spectroscopy):  $^1\text{H}$  NMR ( $\text{CDCl}_3$ , 400 MHz)  $\delta$  7.44 (m, 5H), 4.26 (ddd,  $J = 10.6$ , 9.7, 7.9, 1H), 3.75 (dd,  $J = 10.5$ , 7.9, 1H), 3.39 (dd,  $J = 10.5$ , 9.7, 1H), 2.66 (m, 2H), 1.94 (ddd,  $J = 12.5$ , 10.7, 9.4, 1H), 1.51 (s, 9H), 1.35 (m, 2H), 1.18 (m, 12H);  $^{13}\text{C}$  NMR ( $\text{CDCl}_3$ , 100 MHz)  $\delta$  172.7, 150.5, 135.1, 132.0, 130.2, 128.7, 83.9, 55.3, 50.2, 38.5, 28.2, 27.9, 19.0, 18.9, 18.8, 18.7, 11.8, 11.1; IR (thin film) 2946, 2867, 1818, 1713  $\text{cm}^{-1}$ ; HRMS (ESI)  $m/z$  calcd for  $\text{C}_{22}\text{H}_{37}\text{N}_2\text{O}_3\text{Si}$  ( $\text{M} + \text{H}$ ) $^+$  405.2574, found 405.2571.

VI. HPLC Data for Enantioenriched  $\alpha$ -Silyloxy Allylic Silane (-)-14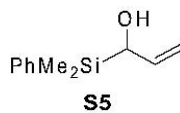

Page 1 of 1

## Area % Report

Data File: C:\EZStart\Data\NML6073-rac10-16-2007 11-17-43 AM.dat  
Method: C:\Documents and Settings\User\Desktop\nick.met  
Acquired: 10/16/2007 11:42:13 AM  
Printed: 4/15/2008 3:20:37 PM

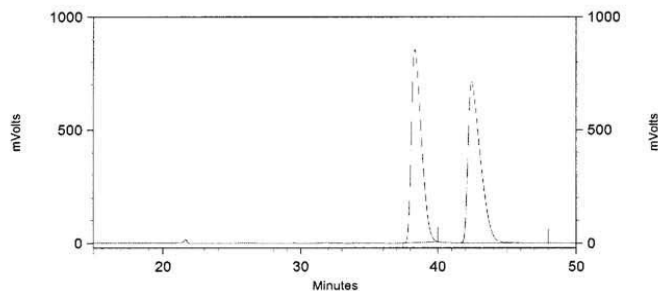UV Detector  
Ch1-254nm  
Results

| Retention Time | Area    | Area % | Height | Height % |
|----------------|---------|--------|--------|----------|
| 38.317         | 2265429 | 49.97  | 44068  | 54.91    |
| 40.833         | 302     | 0.01   | 38     | 0.05     |
| 42.442         | 2268093 | 50.03  | 36150  | 45.04    |
| Totals         | 4533824 | 100.00 | 80256  | 100.00   |

UV Detector  
Ch2-220nm  
Results

| Retention Time | Area     | Area % | Height  | Height % |
|----------------|----------|--------|---------|----------|
| 38.317         | 43277424 | 49.34  | 852690  | 54.59    |
| 42.442         | 44434722 | 50.66  | 709204  | 45.41    |
| Totals         | 87712146 | 100.00 | 1561894 | 100.00   |

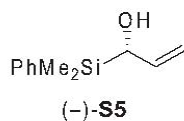

Page 1 of 1

**Area % Report**

Data File: C:\EZStart\Data\NML6091-2-enrichedOH-210-26-2007 11-02-12 PM.dat  
Method: C:\EZStart\Methods\Chiracel Safe Methods\0.5%IPA hex-60 min w flush and  
equilibration-special report NML.met  
Acquired: 10/26/2007 11:03:02 PM  
Printed: 10/27/2007 11:02:43 AM

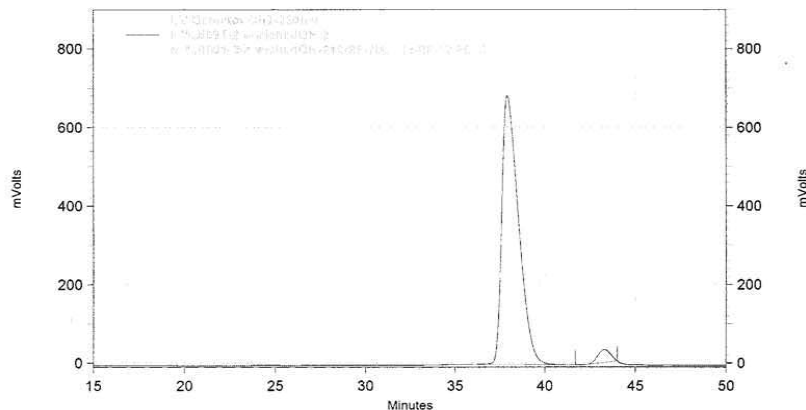**UV Detector  
Ch1-254nm  
Results**

| Retention Time | Area    | Area % | Height | Height % |
|----------------|---------|--------|--------|----------|
| 37.925         | 2237434 | 96.26  | 34754  | 95.12    |
| 43.292         | 86951   | 3.74   | 1784   | 4.88     |
| Totals         | 2324385 | 100.00 | 36538  | 100.00   |

**UV Detector  
Ch2-220nm  
Results**

| Retention Time | Area     | Area % | Height | Height % |
|----------------|----------|--------|--------|----------|
| 37.925         | 44152251 | 96.48  | 685341 | 95.38    |
| 43.292         | 1613012  | 3.52   | 33210  | 4.62     |
| Totals         | 45765263 | 100.00 | 718551 | 100.00   |

## VII. X-Ray Crystallography

### X-ray Data Collection, Structure Solution and Refinement for Nitrile (–)-16.

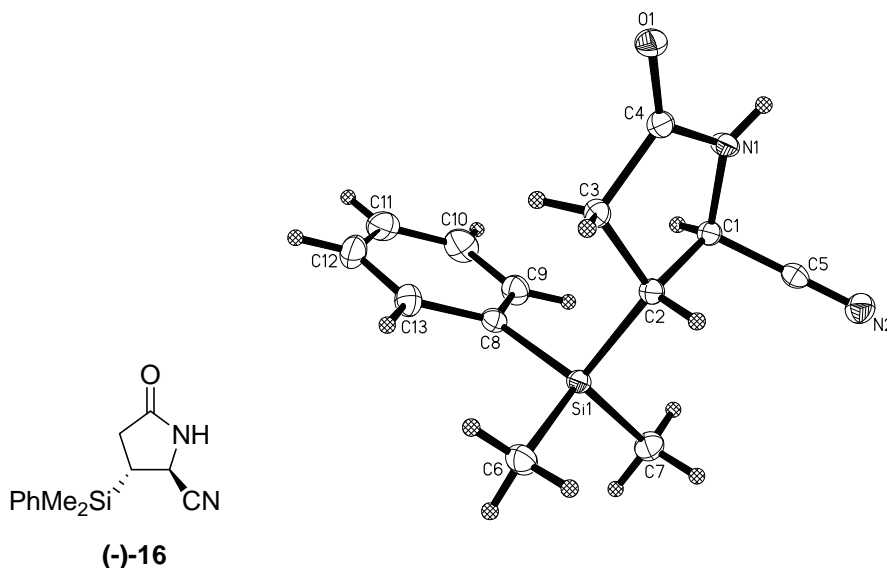

A colorless crystal of approximate dimensions 0.09 x 0.26 x 0.28 mm was mounted on a glass fiber and transferred to a Bruker CCD platform diffractometer. The SMART<sup>1</sup> program package was used to determine the unit-cell parameters and for data collection (40 sec/frame scan time for a hemisphere of diffraction data). The raw frame data was processed using SAINT<sup>2</sup> and SADABS<sup>3</sup> to yield the reflection data file. Subsequent calculations were carried out using the SHELXTL<sup>4</sup> program. The diffraction symmetry was  $2/m$  and the systematic absences were consistent with the centrosymmetric monoclinic space group  $P2_1/c$  that was later determined to be correct.

The structure was solved by direct methods and refined on  $F^2$  by full-matrix least-squares techniques. The analytical scattering factors<sup>5</sup> for neutral atoms were used throughout the analysis. Hydrogen atoms were located from a difference-Fourier map and refined ( $x, y, z$  and  $U_{iso}$ ). At convergence,  $wR2 = 0.1023$  and  $Goof = 1.049$  for 218 variables refined against 3197 data ( $0.75\text{\AA}$ ),  $R1 = 0.0361$  for those 2530 data with  $I > 2.0\sigma(I)$ .

#### References.

1. SMART Software Users Guide, Version 5.1, Bruker Analytical X-Ray Systems, Inc.; Madison, WI 1999.
2. SAINT Software Users Guide, Version 6.0, Bruker Analytical X-Ray Systems, Inc.; Madison, WI 1999.
3. Sheldrick, G. M. SADABS, Version 2.10, Bruker Analytical X-Ray Systems, Inc.; Madison, WI 2002.
4. Sheldrick, G. M. SHELXTL Version 6.12, Bruker Analytical X-Ray Systems, Inc.; Madison, WI 2001.
5. International Tables for X-Ray Crystallography 1992, Vol. C., Dordrecht: Kluwer Academic Publishers.

#### Definitions:

$$wR2 = [\Sigma[w(F_o^2 - F_c^2)^2] / \Sigma[w(F_o^2)^2]]^{1/2}$$

$$R1 = \Sigma ||F_o| - |F_c|| / \Sigma |F_o|$$

Goof =  $S = [\Sigma [w(F_o^2 - F_c^2)^2] / (n-p)]^{1/2}$  where n is the number of reflections and p is the total number of parameters refined.

The thermal ellipsoid plot is shown at the 50% probability level.

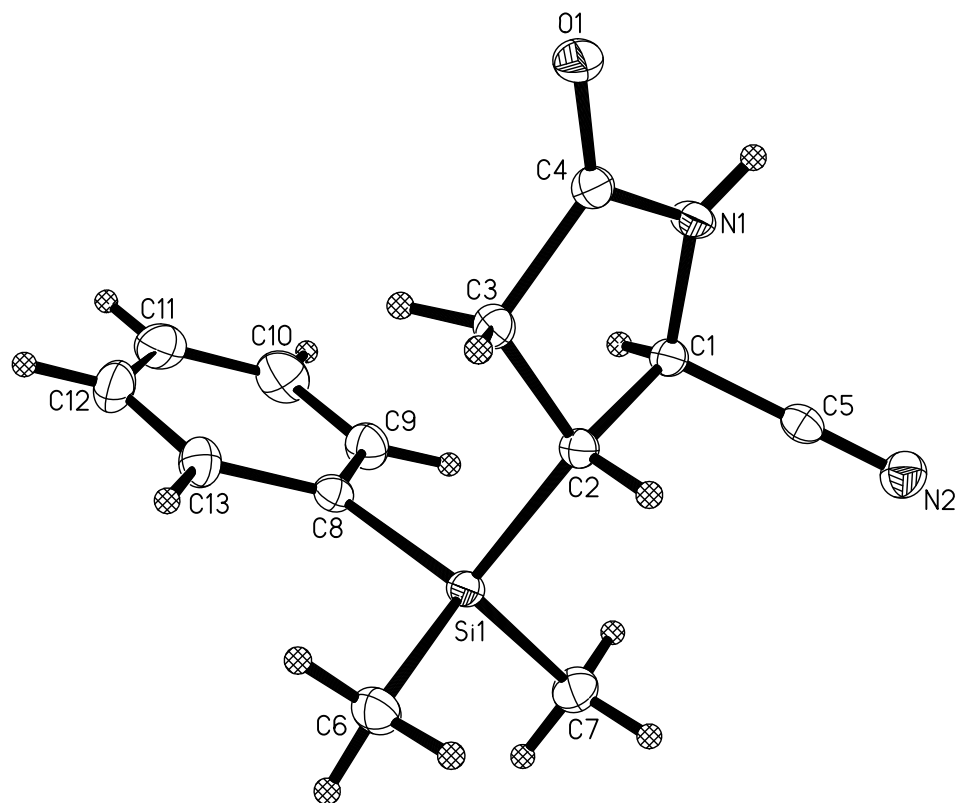

Table 1. Crystal data and structure refinement for nitrile (–)-**16**.

|                      |                                                                                         |
|----------------------|-----------------------------------------------------------------------------------------|
| Identification code  | kaw117 (Nick Leonard)                                                                   |
| Empirical formula    | C <sub>13</sub> H <sub>16</sub> N <sub>2</sub> O Si                                     |
| Formula weight       | 244.37                                                                                  |
| Temperature          | 155(2) K                                                                                |
| Wavelength           | 0.71073 Å                                                                               |
| Crystal system       | Monoclinic                                                                              |
| Space group          | <i>P</i> 2 <sub>1</sub> / <i>c</i>                                                      |
| Unit cell dimensions | $a = 15.1467(16) \text{ Å}$<br>$b = 6.6838(7) \text{ Å}$<br>$c = 12.8779(13) \text{ Å}$ |
|                      | $\alpha = 90^\circ$<br>$\beta = 90.948(2)^\circ$<br>$\gamma = 90^\circ$                 |
| Volume               | 1303.5(2) Å <sup>3</sup>                                                                |
| <i>Z</i>             | 4                                                                                       |
| Density (calculated) | 1.245 Mg/m <sup>3</sup>                                                                 |

|                                           |                                                             |
|-------------------------------------------|-------------------------------------------------------------|
| Absorption coefficient                    | 0.166 mm <sup>-1</sup>                                      |
| F(000)                                    | 520                                                         |
| Crystal color                             | colorless                                                   |
| Crystal size                              | 0.28 x 0.26 x 0.09 mm <sup>3</sup>                          |
| Theta range for data collection           | 2.69 to 28.29°.                                             |
| Index ranges                              | -20 ≤ <i>h</i> ≤ 20, -8 ≤ <i>k</i> ≤ 8, -17 ≤ <i>l</i> ≤ 14 |
| Reflections collected                     | 8489                                                        |
| Independent reflections                   | 3197 [R(int) = 0.0284]                                      |
| Completeness to theta = 28.29°            | 98.7 %                                                      |
| Absorption correction                     | Semi-empirical from equivalents                             |
| Max. and min. transmission                | 0.9852 and 0.9550                                           |
| Refinement method                         | Full-matrix least-squares on F <sup>2</sup>                 |
| Data / restraints / parameters            | 3197 / 0 / 218                                              |
| Goodness-of-fit on F <sup>2</sup>         | 1.049                                                       |
| Final R indices [I>2sigma(I) = 2530 data] | R1 = 0.0361, wR2 = 0.0918                                   |
| R indices (all data, 0.75Å)               | R1 = 0.0519, wR2 = 0.1023                                   |
| Largest diff. peak and hole               | 0.541 and -0.259 e.Å <sup>-3</sup>                          |

Table 2. Atomic coordinates (x 10<sup>4</sup>) and equivalent isotropic displacement parameters (Å<sup>2</sup>x 10<sup>3</sup>) for nitrile (–)-**16**. U(eq) is defined as one third of the trace of the orthogonalized U<sup>ij</sup> tensor.

|       | x       | y        | z        | U(eq) |
|-------|---------|----------|----------|-------|
| Si(1) | 2489(1) | 1373(1)  | 9013(1)  | 13(1) |
| O(1)  | 990(1)  | -4720(2) | 10892(1) | 20(1) |
| N(1)  | 622(1)  | -2952(2) | 9419(1)  | 17(1) |
| N(2)  | -285(1) | 799(2)   | 7933(1)  | 22(1) |
| C(1)  | 980(1)  | -1335(2) | 8791(1)  | 14(1) |
| C(2)  | 1550(1) | -114(2)  | 9583(1)  | 14(1) |
| C(3)  | 1819(1) | -1735(2) | 10377(1) | 16(1) |
| C(4)  | 1102(1) | -3313(2) | 10291(1) | 16(1) |
| C(5)  | 266(1)  | -135(2)  | 8311(1)  | 16(1) |
| C(6)  | 2974(1) | 2934(2)  | 10078(1) | 22(1) |
| C(7)  | 2067(1) | 2965(2)  | 7930(1)  | 23(1) |
| C(8)  | 3322(1) | -478(2)  | 8534(1)  | 16(1) |
| C(9)  | 3235(1) | -1354(2) | 7551(1)  | 22(1) |
| C(10) | 3813(1) | -2824(3) | 7222(1)  | 30(1) |
| C(11) | 4494(1) | -3474(3) | 7869(2)  | 30(1) |



|       |         |          |         |       |
|-------|---------|----------|---------|-------|
| C(12) | 4598(1) | -2635(3) | 8846(1) | 28(1) |
| C(13) | 4025(1) | -1149(2) | 9169(1) | 21(1) |

Table 3. Bond lengths [Å] and angles [°] for nitrile (–)-**16**.

|                 |            |
|-----------------|------------|
| Si(1)-C(7)      | 1.8597(15) |
| Si(1)-C(6)      | 1.8644(15) |
| Si(1)-C(8)      | 1.8784(14) |
| Si(1)-C(2)      | 1.8932(14) |
| O(1)-C(4)       | 1.2320(17) |
| N(1)-C(4)       | 1.3489(18) |
| N(1)-C(1)       | 1.4596(18) |
| N(2)-C(5)       | 1.1435(18) |
| C(1)-C(5)       | 1.4747(19) |
| C(1)-C(2)       | 1.5570(18) |
| C(2)-C(3)       | 1.5397(18) |
| C(3)-C(4)       | 1.5169(19) |
| C(8)-C(9)       | 1.399(2)   |
| C(8)-C(13)      | 1.405(2)   |
| C(9)-C(10)      | 1.387(2)   |
| C(10)-C(11)     | 1.385(3)   |
| C(11)-C(12)     | 1.384(3)   |
| C(12)-C(13)     | 1.388(2)   |
| C(7)-Si(1)-C(6) | 110.99(8)  |
| C(7)-Si(1)-C(8) | 110.80(7)  |
| C(6)-Si(1)-C(8) | 110.58(7)  |
| C(7)-Si(1)-C(2) | 109.89(7)  |
| C(6)-Si(1)-C(2) | 107.31(7)  |
| C(8)-Si(1)-C(2) | 107.13(6)  |
| C(4)-N(1)-C(1)  | 113.16(12) |
| N(1)-C(1)-C(5)  | 111.02(11) |
| N(1)-C(1)-C(2)  | 103.46(10) |
| C(5)-C(1)-C(2)  | 112.68(11) |
| C(3)-C(2)-C(1)  | 101.75(10) |
| C(3)-C(2)-Si(1) | 115.80(9)  |
| C(1)-C(2)-Si(1) | 115.68(9)  |
| C(4)-C(3)-C(2)  | 105.05(11) |

|                   |            |
|-------------------|------------|
| O(1)-C(4)-N(1)    | 125.58(13) |
| O(1)-C(4)-C(3)    | 126.19(13) |
| N(1)-C(4)-C(3)    | 108.19(12) |
| N(2)-C(5)-C(1)    | 179.56(16) |
| C(9)-C(8)-C(13)   | 116.90(13) |
| C(9)-C(8)-Si(1)   | 121.27(11) |
| C(13)-C(8)-Si(1)  | 121.70(11) |
| C(10)-C(9)-C(8)   | 121.49(15) |
| C(11)-C(10)-C(9)  | 120.42(16) |
| C(12)-C(11)-C(10) | 119.46(15) |
| C(11)-C(12)-C(13) | 120.02(15) |
| C(12)-C(13)-C(8)  | 121.70(14) |

Table 4. Anisotropic displacement parameters ( $\text{\AA}^2 \times 10^3$ ) for nitrile (–)-**16**. The anisotropic displacement factor exponent takes the form:  $-2\pi^2 [h^2 a^{*2} U^{11} + \dots + 2 h k a^* b^* U^{12}]$

|       | U <sup>11</sup> | U <sup>22</sup> | U <sup>33</sup> | U <sup>23</sup> | U <sup>13</sup> | U <sup>12</sup> |
|-------|-----------------|-----------------|-----------------|-----------------|-----------------|-----------------|
| Si(1) | 14(1)           | 12(1)           | 14(1)           | 1(1)            | -1(1)           | -1(1)           |
| O(1)  | 21(1)           | 19(1)           | 22(1)           | 7(1)            | -2(1)           | -2(1)           |
| N(1)  | 18(1)           | 15(1)           | 17(1)           | 3(1)            | -4(1)           | -5(1)           |
| N(2)  | 22(1)           | 21(1)           | 21(1)           | 1(1)            | -4(1)           | 1(1)            |
| C(1)  | 15(1)           | 14(1)           | 13(1)           | 1(1)            | -1(1)           | -1(1)           |
| C(2)  | 14(1)           | 14(1)           | 12(1)           | 0(1)            | -1(1)           | -1(1)           |
| C(3)  | 16(1)           | 18(1)           | 14(1)           | 4(1)            | -2(1)           | -2(1)           |
| C(4)  | 15(1)           | 15(1)           | 17(1)           | 1(1)            | 1(1)            | 0(1)            |
| C(5)  | 17(1)           | 16(1)           | 13(1)           | -1(1)           | 0(1)            | -4(1)           |
| C(6)  | 20(1)           | 20(1)           | 25(1)           | -6(1)           | -1(1)           | -2(1)           |
| C(7)  | 23(1)           | 21(1)           | 25(1)           | 8(1)            | -1(1)           | 1(1)            |
| C(8)  | 15(1)           | 15(1)           | 16(1)           | 1(1)            | 2(1)            | -2(1)           |
| C(9)  | 22(1)           | 24(1)           | 21(1)           | -4(1)           | -3(1)           | -1(1)           |
| C(10) | 31(1)           | 30(1)           | 29(1)           | -13(1)          | 4(1)            | -2(1)           |
| C(11) | 24(1)           | 21(1)           | 47(1)           | -5(1)           | 10(1)           | 3(1)            |
| C(12) | 19(1)           | 28(1)           | 37(1)           | 7(1)            | -1(1)           | 5(1)            |
| C(13) | 19(1)           | 26(1)           | 19(1)           | 2(1)            | -1(1)           | 0(1)            |

Table 5. Hydrogen coordinates ( $\times 10^4$ ) and isotropic displacement parameters ( $\text{\AA}^2 \times 10^3$ ) for nitrile (–)-**16**.

|        | x        | y         | z         | U(eq) |
|--------|----------|-----------|-----------|-------|
| H(1)   | 198(12)  | -3700(30) | 9229(14)  | 28(5) |
| H(1A)  | 1328(10) | -1850(20) | 8245(12)  | 12(4) |
| H(2A)  | 1150(11) | 780(20)   | 9919(13)  | 19(4) |
| H(3A)  | 2379(11) | -2350(30) | 10204(13) | 21(4) |
| H(3B)  | 1831(11) | -1220(30) | 11080(14) | 21(4) |
| H(6A)  | 2522(14) | 3720(30)  | 10364(15) | 37(5) |
| H(6B)  | 3271(13) | 2150(30)  | 10632(15) | 38(5) |
| H(6C)  | 3409(15) | 3850(30)  | 9830(16)  | 45(6) |
| H(7A)  | 1823(13) | 2170(30)  | 7368(15)  | 35(5) |
| H(7B)  | 2528(14) | 3780(30)  | 7685(15)  | 38(6) |
| H(7C)  | 1618(15) | 3840(30)  | 8148(16)  | 46(6) |
| H(9A)  | 2765(12) | -930(30)  | 7116(14)  | 30(5) |
| H(10A) | 3746(13) | -3380(30) | 6565(16)  | 39(6) |
| H(11A) | 4889(13) | -4470(30) | 7646(15)  | 36(5) |
| H(12A) | 5058(13) | -3080(30) | 9285(14)  | 31(5) |
| H(13A) | 4106(12) | -510(30)  | 9840(15)  | 31(5) |

Table 6. Torsion angles [ $^{\circ}$ ] for nitrile (–)-**16**.

|                      |             |
|----------------------|-------------|
| C(4)-N(1)-C(1)-C(5)  | -143.18(12) |
| C(4)-N(1)-C(1)-C(2)  | -22.07(15)  |
| N(1)-C(1)-C(2)-C(3)  | 28.11(13)   |
| C(5)-C(1)-C(2)-C(3)  | 148.08(11)  |
| N(1)-C(1)-C(2)-Si(1) | 154.50(9)   |
| C(5)-C(1)-C(2)-Si(1) | -85.53(13)  |
| C(7)-Si(1)-C(2)-C(3) | 171.13(10)  |
| C(6)-Si(1)-C(2)-C(3) | -68.09(12)  |
| C(8)-Si(1)-C(2)-C(3) | 50.68(11)   |
| C(7)-Si(1)-C(2)-C(1) | 52.22(12)   |
| C(6)-Si(1)-C(2)-C(1) | 172.99(10)  |
| C(8)-Si(1)-C(2)-C(1) | -68.23(11)  |
| C(1)-C(2)-C(3)-C(4)  | -25.33(13)  |
| Si(1)-C(2)-C(3)-C(4) | -151.64(9)  |
| C(1)-N(1)-C(4)-O(1)  | -172.31(13) |

---

|                         |             |
|-------------------------|-------------|
| C(1)-N(1)-C(4)-C(3)     | 5.65(16)    |
| C(2)-C(3)-C(4)-O(1)     | -168.56(14) |
| C(2)-C(3)-C(4)-N(1)     | 13.50(15)   |
| N(1)-C(1)-C(5)-N(2)     | -154(100)   |
| C(2)-C(1)-C(5)-N(2)     | 90(24)      |
| C(7)-Si(1)-C(8)-C(9)    | -35.57(14)  |
| C(6)-Si(1)-C(8)-C(9)    | -159.07(12) |
| C(2)-Si(1)-C(8)-C(9)    | 84.30(13)   |
| C(7)-Si(1)-C(8)-C(13)   | 148.84(12)  |
| C(6)-Si(1)-C(8)-C(13)   | 25.34(14)   |
| C(2)-Si(1)-C(8)-C(13)   | -91.29(13)  |
| C(13)-C(8)-C(9)-C(10)   | 0.4(2)      |
| Si(1)-C(8)-C(9)-C(10)   | -175.41(13) |
| C(8)-C(9)-C(10)-C(11)   | 0.3(3)      |
| C(9)-C(10)-C(11)-C(12)  | -0.4(3)     |
| C(10)-C(11)-C(12)-C(13) | -0.3(3)     |
| C(11)-C(12)-C(13)-C(8)  | 1.0(2)      |
| C(9)-C(8)-C(13)-C(12)   | -1.1(2)     |
| Si(1)-C(8)-C(13)-C(12)  | 174.71(12)  |

---

X-ray Data Collection, Structure Solution and Refinement for Tosylate **S25**.  
 Note: Compound **S25** is an intermediate in the formation of  $\delta$ -lactam **4** (Scheme 1.)

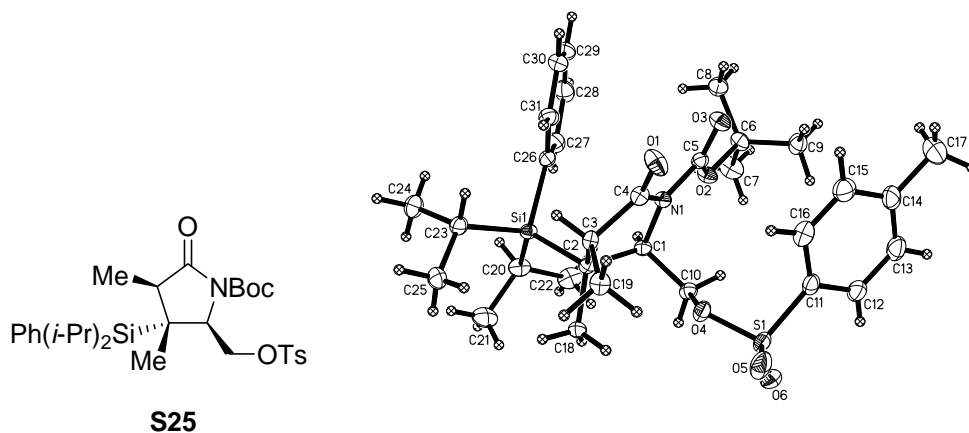

A colorless crystal of approximate dimensions 0.21 x 0.26 x 0.34 mm was mounted on a glass fiber and transferred to a Bruker CCD platform diffractometer. The SMART<sup>1</sup> program package was used to determine the unit-cell parameters and for data collection (25 sec/frame scan time for a sphere of diffraction data). The raw frame data was processed using SAINT<sup>2</sup> and SADABS<sup>3</sup> to yield the reflection data file. Subsequent calculations were carried out using the SHELXTL<sup>4</sup> program. The diffraction symmetry was *mmm* and the systematic absences were consistent with the orthorhombic space groups *Pna2*<sub>1</sub> and *Pnma*. It was later determined that the noncentrosymmetric space group *Pna2*<sub>1</sub> was correct.

The structure was solved by direct methods and refined on *F*<sup>2</sup> by full-matrix least-squares techniques. The analytical scattering factors<sup>5</sup> for neutral atoms were used throughout the analysis. Hydrogen atoms were located from a difference-Fourier map and refined (*x*,*y*,*z* and *U*<sub>iso</sub>). At convergence, *wR*2 = 0.0720 and GOF = 1.056 for 541 variables refined against 7744 data (0.75Å), *R*1 = 0.0301 for those 6796 data with *I* > 2.0σ(*I*). The absolute structure was assigned by refinement of the Flack<sup>6</sup> parameter.

#### References.

1. SMART Software Users Guide, Version 5.1, Bruker Analytical X-Ray Systems, Inc.; Madison, WI 1999.
2. SAINT Software Users Guide, Version 6.0, Bruker Analytical X-Ray Systems, Inc.; Madison, WI 1999.
3. Sheldrick, G. M. SADABS, Version 2.10, Bruker Analytical X-Ray Systems, Inc.; Madison, WI 2002.
4. Sheldrick, G. M. SHELXTL Version 6.12, Bruker Analytical X-Ray Systems, Inc.; Madison, WI 2001.
5. International Tables for X-Ray Crystallography 1992, Vol. C., Dordrecht: Kluwer Academic Publishers.
6. Flack, H. D. Acta. Cryst., A39, 876-881, 1983.

#### Definitions:

$$wR2 = [\Sigma[w(F_o^2 - F_c^2)^2] / \Sigma[w(F_o^2)]]^{1/2}$$

$$R1 = \Sigma||F_o| - |F_c|| / \Sigma|F_o|$$

$$Goof = S = [\Sigma[w(F_o^2 - F_c^2)^2] / (n-p)]^{1/2} \text{ where } n \text{ is the number of reflections and } p \text{ is the total}$$

number of parameters refined.

The thermal ellipsoid plot is shown at the 50% probability level.

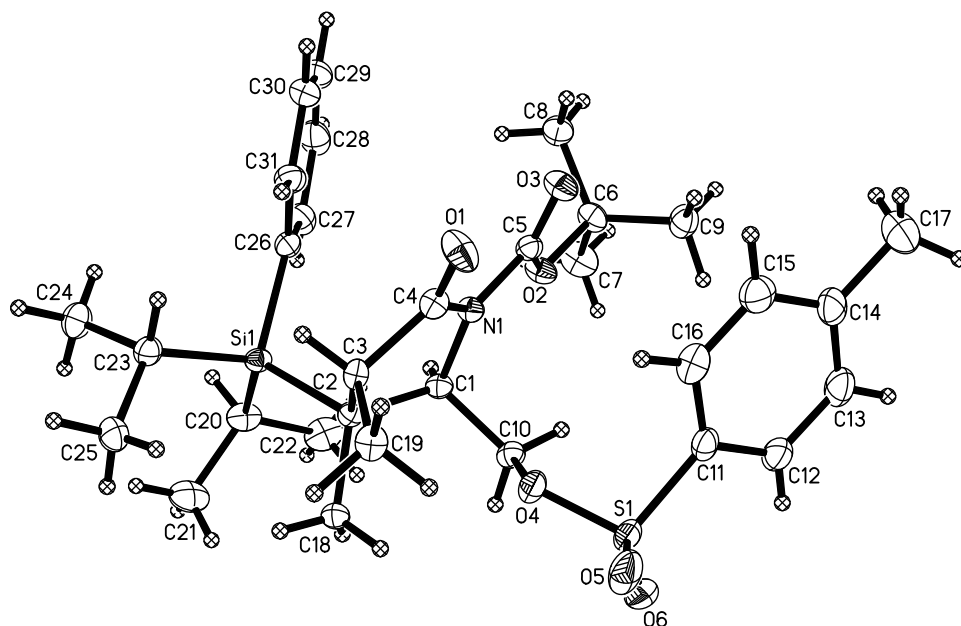

Table 1. Crystal data and structure refinement for tosylate **S25**.

|                                 |                                                                    |                       |
|---------------------------------|--------------------------------------------------------------------|-----------------------|
| Identification code             | kaw103 (Nick Leonard)                                              |                       |
| Empirical formula               | $C_{31} H_{45} N O_6 S Si$                                         |                       |
| Formula weight                  | 587.83                                                             |                       |
| Temperature                     | 158(2) K                                                           |                       |
| Wavelength                      | 0.71073 Å                                                          |                       |
| Crystal system                  | Orthorhombic                                                       |                       |
| Space group                     | $Pna2_1$                                                           |                       |
| Unit cell dimensions            | $a = 19.3855(16)$ Å                                                | $\alpha = 90^\circ$ . |
|                                 | $b = 9.3470(8)$ Å                                                  | $\beta = 90^\circ$ .  |
|                                 | $c = 17.3356(14)$ Å                                                | $\gamma = 90^\circ$ . |
| Volume                          | $3141.1(5)$ Å <sup>3</sup>                                         |                       |
| Z                               | 4                                                                  |                       |
| Density (calculated)            | $1.243$ Mg/m <sup>3</sup>                                          |                       |
| Absorption coefficient          | $0.184$ mm <sup>-1</sup>                                           |                       |
| F(000)                          | 1264                                                               |                       |
| Crystal color                   | colorless                                                          |                       |
| Crystal size                    | $0.34 \times 0.26 \times 0.21$ mm <sup>3</sup>                     |                       |
| Theta range for data collection | $2.10$ to $28.33^\circ$                                            |                       |
| Index ranges                    | $-25 \leq h \leq 25$ , $-12 \leq k \leq 12$ , $-23 \leq l \leq 23$ |                       |

|                                           |                                             |
|-------------------------------------------|---------------------------------------------|
| Reflections collected                     | 33302                                       |
| Independent reflections                   | 7744 [R(int) = 0.0405]                      |
| Completeness to theta = 28.33°            | 99.7 %                                      |
| Absorption correction                     | Semi-empirical from equivalents             |
| Max. and min. transmission                | 0.9625 and 0.9402                           |
| Refinement method                         | Full-matrix least-squares on F <sup>2</sup> |
| Data / restraints / parameters            | 7744 / 1 / 541                              |
| Goodness-of-fit on F <sup>2</sup>         | 1.056                                       |
| Final R indices [I>2sigma(I) = 6796 data] | R1 = 0.0301, wR2 = 0.0666                   |
| R indices (all data, 0.75Å)               | R1 = 0.0416, wR2 = 0.0720                   |
| Absolute structure parameter              | -0.04(5)                                    |
| Largest diff. peak and hole               | 0.293 and -0.228 e.Å <sup>-3</sup>          |

Table 2. Atomic coordinates ( $\times 10^4$ ) and equivalent isotropic displacement parameters ( $\text{\AA}^2 \times 10^3$ ) for tosylate **S25**. U(eq) is defined as one third of the trace of the orthogonalized  $U^{ij}$  tensor.

|       | x        | y       | z       | U(eq) |
|-------|----------|---------|---------|-------|
| S(1)  | 11895(1) | 7187(1) | 6771(1) | 26(1) |
| Si(1) | 9298(1)  | 3047(1) | 6355(1) | 16(1) |
| O(1)  | 9964(1)  | 7048(1) | 4887(1) | 29(1) |
| O(2)  | 11293(1) | 3512(1) | 4857(1) | 20(1) |
| O(3)  | 10897(1) | 5322(1) | 4099(1) | 23(1) |
| O(4)  | 11212(1) | 6304(1) | 6632(1) | 22(1) |
| O(5)  | 11648(1) | 8571(2) | 6983(1) | 38(1) |
| O(6)  | 12335(1) | 6409(2) | 7283(1) | 36(1) |
| N(1)  | 10535(1) | 5047(1) | 5355(1) | 16(1) |
| C(1)  | 10604(1) | 4303(2) | 6096(1) | 16(1) |
| C(2)  | 9915(1)  | 4636(2) | 6528(1) | 15(1) |
| C(3)  | 9643(1)  | 6016(2) | 6124(1) | 16(1) |
| C(4)  | 10049(1) | 6140(2) | 5374(1) | 18(1) |
| C(5)  | 10918(1) | 4681(2) | 4693(1) | 17(1) |
| C(6)  | 11725(1) | 2829(2) | 4246(1) | 22(1) |
| C(7)  | 11986(1) | 1501(2) | 4654(1) | 33(1) |
| C(8)  | 11279(1) | 2420(2) | 3568(1) | 26(1) |
| C(9)  | 12310(1) | 3830(2) | 4040(1) | 27(1) |
| C(10) | 11270(1) | 4772(2) | 6492(1) | 19(1) |
| C(11) | 12273(1) | 7253(2) | 5849(1) | 22(1) |

|       |          |         |         |       |
|-------|----------|---------|---------|-------|
| C(12) | 12970(1) | 6942(2) | 5773(1) | 27(1) |
| C(13) | 13279(1) | 7076(2) | 5057(1) | 33(1) |
| C(14) | 12898(1) | 7490(2) | 4415(1) | 31(1) |
| C(15) | 12196(1) | 7765(2) | 4505(1) | 32(1) |
| C(16) | 11884(1) | 7662(2) | 5217(1) | 28(1) |
| C(17) | 13239(2) | 7619(3) | 3634(2) | 51(1) |
| C(18) | 10014(1) | 4798(2) | 7404(1) | 19(1) |
| C(19) | 9680(1)  | 7436(2) | 6564(1) | 21(1) |
| C(20) | 9545(1)  | 1438(2) | 6969(1) | 24(1) |
| C(21) | 9289(1)  | 1475(2) | 7810(1) | 33(1) |
| C(22) | 10313(1) | 1037(2) | 6954(1) | 31(1) |
| C(23) | 8362(1)  | 3574(2) | 6511(1) | 21(1) |
| C(24) | 7895(1)  | 2235(2) | 6482(1) | 31(1) |
| C(25) | 8193(1)  | 4477(2) | 7223(1) | 25(1) |
| C(26) | 9327(1)  | 2497(2) | 5303(1) | 19(1) |
| C(27) | 9557(1)  | 1151(2) | 5060(1) | 26(1) |
| C(28) | 9521(1)  | 733(2)  | 4293(1) | 32(1) |
| C(29) | 9255(1)  | 1658(2) | 3744(1) | 32(1) |
| C(30) | 9030(1)  | 3002(2) | 3965(1) | 29(1) |
| C(31) | 9065(1)  | 3414(2) | 4733(1) | 23(1) |

Table 3. Bond lengths [Å] and angles [°] for tosylate **S25**.

|             |            |
|-------------|------------|
| S(1)-O(5)   | 1.4274(14) |
| S(1)-O(6)   | 1.4299(14) |
| S(1)-O(4)   | 1.5777(11) |
| S(1)-C(11)  | 1.7609(17) |
| Si(1)-C(26) | 1.8962(16) |
| Si(1)-C(23) | 1.8991(16) |
| Si(1)-C(20) | 1.9030(16) |
| Si(1)-C(2)  | 1.9304(15) |
| O(1)-C(4)   | 1.2081(19) |
| O(2)-C(5)   | 1.3418(18) |
| O(2)-C(6)   | 1.4934(18) |
| O(3)-C(5)   | 1.1927(18) |
| O(4)-C(10)  | 1.4574(19) |
| N(1)-C(4)   | 1.3898(19) |
| N(1)-C(5)   | 1.4094(19) |



---

|                   |            |
|-------------------|------------|
| N(1)-C(1)         | 1.4681(19) |
| C(1)-C(10)        | 1.526(2)   |
| C(1)-C(2)         | 1.563(2)   |
| C(2)-C(18)        | 1.539(2)   |
| C(2)-C(3)         | 1.559(2)   |
| C(3)-C(4)         | 1.525(2)   |
| C(3)-C(19)        | 1.532(2)   |
| C(6)-C(8)         | 1.510(2)   |
| C(6)-C(9)         | 1.514(2)   |
| C(6)-C(7)         | 1.515(2)   |
| C(11)-C(16)       | 1.384(3)   |
| C(11)-C(12)       | 1.388(2)   |
| C(12)-C(13)       | 1.384(3)   |
| C(13)-C(14)       | 1.391(3)   |
| C(14)-C(15)       | 1.394(3)   |
| C(14)-C(17)       | 1.511(3)   |
| C(15)-C(16)       | 1.377(3)   |
| C(20)-C(22)       | 1.536(3)   |
| C(20)-C(21)       | 1.541(3)   |
| C(23)-C(25)       | 1.530(2)   |
| C(23)-C(24)       | 1.545(2)   |
| C(26)-C(27)       | 1.400(2)   |
| C(26)-C(31)       | 1.403(2)   |
| C(27)-C(28)       | 1.387(3)   |
| C(28)-C(29)       | 1.386(3)   |
| C(29)-C(30)       | 1.384(3)   |
| C(30)-C(31)       | 1.387(2)   |
|                   |            |
| O(5)-S(1)-O(6)    | 120.13(9)  |
| O(5)-S(1)-O(4)    | 103.43(7)  |
| O(6)-S(1)-O(4)    | 109.23(7)  |
| O(5)-S(1)-C(11)   | 109.99(9)  |
| O(6)-S(1)-C(11)   | 109.37(8)  |
| O(4)-S(1)-C(11)   | 103.24(7)  |
| C(26)-Si(1)-C(23) | 103.66(7)  |
| C(26)-Si(1)-C(20) | 108.42(7)  |
| C(23)-Si(1)-C(20) | 111.46(7)  |
| C(26)-Si(1)-C(2)  | 109.80(7)  |

---

|                   |            |
|-------------------|------------|
| C(23)-Si(1)-C(2)  | 111.70(7)  |
| C(20)-Si(1)-C(2)  | 111.46(7)  |
| C(5)-O(2)-C(6)    | 120.13(12) |
| C(10)-O(4)-S(1)   | 118.38(9)  |
| C(4)-N(1)-C(5)    | 123.75(13) |
| C(4)-N(1)-C(1)    | 112.95(12) |
| C(5)-N(1)-C(1)    | 123.30(12) |
| N(1)-C(1)-C(10)   | 109.64(12) |
| N(1)-C(1)-C(2)    | 104.23(11) |
| C(10)-C(1)-C(2)   | 116.81(13) |
| C(18)-C(2)-C(3)   | 113.82(12) |
| C(18)-C(2)-C(1)   | 112.63(12) |
| C(3)-C(2)-C(1)    | 103.82(11) |
| C(18)-C(2)-Si(1)  | 107.83(10) |
| C(3)-C(2)-Si(1)   | 110.99(9)  |
| C(1)-C(2)-Si(1)   | 107.60(10) |
| C(4)-C(3)-C(19)   | 109.52(12) |
| C(4)-C(3)-C(2)    | 105.77(11) |
| C(19)-C(3)-C(2)   | 118.53(13) |
| O(1)-C(4)-N(1)    | 126.30(14) |
| O(1)-C(4)-C(3)    | 125.41(14) |
| N(1)-C(4)-C(3)    | 108.29(12) |
| O(3)-C(5)-O(2)    | 127.61(14) |
| O(3)-C(5)-N(1)    | 124.26(14) |
| O(2)-C(5)-N(1)    | 108.13(12) |
| O(2)-C(6)-C(8)    | 109.83(13) |
| O(2)-C(6)-C(9)    | 108.86(13) |
| C(8)-C(6)-C(9)    | 113.69(15) |
| O(2)-C(6)-C(7)    | 101.98(13) |
| C(8)-C(6)-C(7)    | 110.34(16) |
| C(9)-C(6)-C(7)    | 111.50(15) |
| O(4)-C(10)-C(1)   | 106.98(12) |
| C(16)-C(11)-C(12) | 120.93(17) |
| C(16)-C(11)-S(1)  | 120.09(12) |
| C(12)-C(11)-S(1)  | 118.94(14) |
| C(13)-C(12)-C(11) | 119.15(18) |
| C(12)-C(13)-C(14) | 120.87(17) |
| C(13)-C(14)-C(15) | 118.68(17) |

|                   |            |
|-------------------|------------|
| C(13)-C(14)-C(17) | 120.4(2)   |
| C(15)-C(14)-C(17) | 120.9(2)   |
| C(16)-C(15)-C(14) | 121.07(18) |
| C(15)-C(16)-C(11) | 119.27(16) |
| C(22)-C(20)-C(21) | 109.49(15) |
| C(22)-C(20)-Si(1) | 115.30(12) |
| C(21)-C(20)-Si(1) | 115.47(13) |
| C(25)-C(23)-C(24) | 110.37(14) |
| C(25)-C(23)-Si(1) | 117.53(11) |
| C(24)-C(23)-Si(1) | 110.16(12) |
| C(27)-C(26)-C(31) | 116.86(15) |
| C(27)-C(26)-Si(1) | 122.88(13) |
| C(31)-C(26)-Si(1) | 120.10(12) |
| C(28)-C(27)-C(26) | 121.73(17) |
| C(29)-C(28)-C(27) | 120.12(18) |
| C(30)-C(29)-C(28) | 119.51(16) |
| C(29)-C(30)-C(31) | 120.16(18) |
| C(30)-C(31)-C(26) | 121.62(17) |

Table 4. Anisotropic displacement parameters ( $\text{\AA}^2 \times 10^3$ ) for tosylate **S25**. The anisotropic displacement factor exponent takes the form:  $-2\pi^2 [h^2 a^{*2} U^{11} + \dots + 2 h k a^* b^* U^{12}]$

|       | U <sup>11</sup> | U <sup>22</sup> | U <sup>33</sup> | U <sup>23</sup> | U <sup>13</sup> | U <sup>12</sup> |
|-------|-----------------|-----------------|-----------------|-----------------|-----------------|-----------------|
| S(1)  | 16(1)           | 33(1)           | 27(1)           | -11(1)          | 1(1)            | -6(1)           |
| Si(1) | 19(1)           | 13(1)           | 15(1)           | 0(1)            | -1(1)           | -2(1)           |
| O(1)  | 30(1)           | 27(1)           | 29(1)           | 12(1)           | 9(1)            | 11(1)           |
| O(2)  | 24(1)           | 21(1)           | 17(1)           | -1(1)           | 3(1)            | 8(1)            |
| O(3)  | 27(1)           | 25(1)           | 18(1)           | 3(1)            | 3(1)            | 6(1)            |
| O(4)  | 16(1)           | 22(1)           | 28(1)           | -7(1)           | 0(1)            | -2(1)           |
| O(5)  | 27(1)           | 37(1)           | 51(1)           | -25(1)          | 10(1)           | -10(1)          |
| O(6)  | 22(1)           | 60(1)           | 25(1)           | -5(1)           | -5(1)           | -6(1)           |
| N(1)  | 16(1)           | 16(1)           | 15(1)           | 0(1)            | 0(1)            | 2(1)            |
| C(1)  | 17(1)           | 15(1)           | 15(1)           | 1(1)            | -2(1)           | 2(1)            |
| C(2)  | 15(1)           | 14(1)           | 15(1)           | -1(1)           | 0(1)            | 0(1)            |
| C(3)  | 14(1)           | 15(1)           | 21(1)           | 0(1)            | 1(1)            | 0(1)            |
| C(4)  | 18(1)           | 16(1)           | 21(1)           | 1(1)            | -2(1)           | 1(1)            |

|       |       |       |       |        |       |        |
|-------|-------|-------|-------|--------|-------|--------|
| C(5)  | 16(1) | 18(1) | 17(1) | -3(1)  | -1(1) | 0(1)   |
| C(6)  | 22(1) | 22(1) | 21(1) | -4(1)  | 5(1)  | 6(1)   |
| C(7)  | 39(1) | 26(1) | 34(1) | -1(1)  | 5(1)  | 13(1)  |
| C(8)  | 27(1) | 28(1) | 24(1) | -8(1)  | 3(1)  | -1(1)  |
| C(9)  | 21(1) | 30(1) | 31(1) | -3(1)  | 2(1)  | 0(1)   |
| C(10) | 16(1) | 20(1) | 19(1) | -1(1)  | -2(1) | 3(1)   |
| C(11) | 19(1) | 20(1) | 27(1) | -5(1)  | 2(1)  | -5(1)  |
| C(12) | 19(1) | 34(1) | 29(1) | -5(1)  | -1(1) | -2(1)  |
| C(13) | 20(1) | 39(1) | 39(1) | -11(1) | 6(1)  | -5(1)  |
| C(14) | 34(1) | 27(1) | 32(1) | -3(1)  | 6(1)  | -13(1) |
| C(15) | 35(1) | 28(1) | 33(1) | 4(1)   | -5(1) | -7(1)  |
| C(16) | 23(1) | 23(1) | 38(1) | 0(1)   | -1(1) | -1(1)  |
| C(17) | 54(2) | 65(2) | 35(1) | -2(1)  | 12(1) | -19(1) |
| C(18) | 20(1) | 19(1) | 16(1) | -3(1)  | 1(1)  | -1(1)  |
| C(19) | 21(1) | 15(1) | 28(1) | -1(1)  | 2(1)  | 2(1)   |
| C(20) | 34(1) | 15(1) | 22(1) | 3(1)   | -4(1) | -1(1)  |
| C(21) | 48(1) | 26(1) | 23(1) | 9(1)   | -2(1) | -3(1)  |
| C(22) | 38(1) | 19(1) | 34(1) | 4(1)   | -8(1) | 4(1)   |
| C(23) | 21(1) | 21(1) | 21(1) | 1(1)   | -1(1) | -4(1)  |
| C(24) | 28(1) | 31(1) | 33(1) | -1(1)  | 2(1)  | -14(1) |
| C(25) | 21(1) | 29(1) | 27(1) | -2(1)  | 4(1)  | 2(1)   |
| C(26) | 20(1) | 20(1) | 18(1) | -4(1)  | 1(1)  | -6(1)  |
| C(27) | 27(1) | 24(1) | 26(1) | -3(1)  | 4(1)  | -4(1)  |
| C(28) | 33(1) | 32(1) | 30(1) | -13(1) | 9(1)  | -7(1)  |
| C(29) | 31(1) | 46(1) | 19(1) | -12(1) | 5(1)  | -10(1) |
| C(30) | 27(1) | 40(1) | 18(1) | 1(1)   | 0(1)  | -7(1)  |
| C(31) | 26(1) | 23(1) | 20(1) | -1(1)  | -1(1) | -4(1)  |

Table 5. Hydrogen coordinates ( $\times 10^4$ ) and isotropic displacement parameters ( $\text{\AA}^2 \times 10^3$ ) for tosylate **S25**.

|       | x         | y        | z        | U(eq) |
|-------|-----------|----------|----------|-------|
| H(1A) | 10665(9)  | 3320(20) | 5996(11) | 20(4) |
| H(3A) | 9180(9)   | 5859(19) | 5932(10) | 16(4) |
| H(7A) | 11626(11) | 870(20)  | 4818(13) | 39(6) |
| H(7B) | 12235(13) | 1780(30) | 5073(15) | 45(7) |
| H(7C) | 12278(12) | 950(20)  | 4303(13) | 41(6) |
| H(8A) | 10907(11) | 1880(20) | 3743(12) | 26(5) |

|        |           |          |          |        |
|--------|-----------|----------|----------|--------|
| H(8B)  | 11524(11) | 1830(20) | 3212(14) | 38(6)  |
| H(8C)  | 11110(12) | 3260(30) | 3290(14) | 46(6)  |
| H(9A)  | 12142(10) | 4710(20) | 3827(11) | 24(5)  |
| H(9B)  | 12582(11) | 4060(20) | 4500(12) | 34(5)  |
| H(9C)  | 12613(13) | 3320(30) | 3656(15) | 53(7)  |
| H(10A) | 11664(9)  | 4560(19) | 6166(11) | 21(5)  |
| H(10B) | 11357(10) | 4320(20) | 6982(12) | 25(5)  |
| H(12)  | 13200(10) | 6710(20) | 6177(12) | 29(5)  |
| H(13)  | 13770(11) | 6870(20) | 5014(12) | 34(6)  |
| H(15)  | 11924(12) | 8060(20) | 4056(15) | 42(6)  |
| H(16)  | 11422(12) | 7880(20) | 5296(12) | 34(5)  |
| H(17A) | 13184(18) | 6710(40) | 3370(20) | 95(11) |
| H(17B) | 13713(15) | 7910(30) | 3700(16) | 59(8)  |
| H(17C) | 12968(17) | 8260(40) | 3360(20) | 83(11) |
| H(18A) | 10303(9)  | 5620(20) | 7518(11) | 22(5)  |
| H(18B) | 10241(9)  | 4020(19) | 7602(10) | 14(4)  |
| H(18C) | 9604(10)  | 4910(19) | 7638(11) | 19(4)  |
| H(19A) | 9539(9)   | 8212(19) | 6232(11) | 20(4)  |
| H(19B) | 9382(10)  | 7420(20) | 7074(13) | 32(5)  |
| H(19C) | 10161(10) | 7680(20) | 6780(12) | 29(5)  |
| H(20A) | 9291(8)   | 630(20)  | 6730(10) | 17(4)  |
| H(21A) | 8811(12)  | 1670(20) | 7820(12) | 30(5)  |
| H(21B) | 9481(11)  | 2190(20) | 8091(13) | 34(6)  |
| H(21C) | 9354(12)  | 540(30)  | 8038(14) | 53(7)  |
| H(22A) | 10591(10) | 1720(20) | 7205(12) | 26(5)  |
| H(22B) | 10506(9)  | 975(19)  | 6433(12) | 21(4)  |
| H(22C) | 10360(11) | 160(20)  | 7241(12) | 38(6)  |
| H(23A) | 8259(9)   | 4110(20) | 6043(11) | 20(4)  |
| H(24A) | 7974(11)  | 1660(20) | 6047(13) | 35(5)  |
| H(24B) | 7395(13)  | 2610(20) | 6492(14) | 50(7)  |
| H(24C) | 7980(10)  | 1550(20) | 6956(13) | 34(5)  |
| H(25A) | 8315(10)  | 4010(20) | 7701(12) | 22(5)  |
| H(25B) | 8431(10)  | 5370(20) | 7193(11) | 24(5)  |
| H(25C) | 7713(12)  | 4640(20) | 7228(13) | 41(6)  |
| H(27)  | 9725(10)  | 434(19)  | 5451(11) | 22(5)  |
| H(28)  | 9665(11)  | -160(20) | 4139(13) | 39(6)  |
| H(29)  | 9238(10)  | 1360(20) | 3231(13) | 32(5)  |
| H(30)  | 8849(12)  | 3680(20) | 3593(14) | 46(6)  |

|       |         |          |          |       |
|-------|---------|----------|----------|-------|
| H(31) | 8914(9) | 4310(20) | 4855(10) | 17(4) |
|-------|---------|----------|----------|-------|

Table 6. Torsion angles [°] for tosylate **S25**.

|                        |             |
|------------------------|-------------|
| O(5)-S(1)-O(4)-C(10)   | -172.85(11) |
| O(6)-S(1)-O(4)-C(10)   | -43.82(13)  |
| C(11)-S(1)-O(4)-C(10)  | 72.48(12)   |
| C(4)-N(1)-C(1)-C(10)   | -104.73(14) |
| C(5)-N(1)-C(1)-C(10)   | 75.69(17)   |
| C(4)-N(1)-C(1)-C(2)    | 21.04(16)   |
| C(5)-N(1)-C(1)-C(2)    | -158.54(12) |
| N(1)-C(1)-C(2)-C(18)   | -145.23(12) |
| C(10)-C(1)-C(2)-C(18)  | -24.13(18)  |
| N(1)-C(1)-C(2)-C(3)    | -21.65(14)  |
| C(10)-C(1)-C(2)-C(3)   | 99.45(14)   |
| N(1)-C(1)-C(2)-Si(1)   | 96.07(11)   |
| C(10)-C(1)-C(2)-Si(1)  | -142.83(11) |
| C(26)-Si(1)-C(2)-C(18) | -165.99(10) |
| C(23)-Si(1)-C(2)-C(18) | 79.59(12)   |
| C(20)-Si(1)-C(2)-C(18) | -45.82(12)  |
| C(26)-Si(1)-C(2)-C(3)  | 68.71(11)   |
| C(23)-Si(1)-C(2)-C(3)  | -45.71(12)  |
| C(20)-Si(1)-C(2)-C(3)  | -171.13(10) |
| C(26)-Si(1)-C(2)-C(1)  | -44.25(11)  |
| C(23)-Si(1)-C(2)-C(1)  | -158.67(9)  |
| C(20)-Si(1)-C(2)-C(1)  | 75.91(11)   |
| C(18)-C(2)-C(3)-C(4)   | 138.61(13)  |
| C(1)-C(2)-C(3)-C(4)    | 15.82(14)   |
| Si(1)-C(2)-C(3)-C(4)   | -99.52(11)  |
| C(18)-C(2)-C(3)-C(19)  | 15.33(18)   |
| C(1)-C(2)-C(3)-C(19)   | -107.47(14) |
| Si(1)-C(2)-C(3)-C(19)  | 137.20(12)  |
| C(5)-N(1)-C(4)-O(1)    | -12.2(2)    |
| C(1)-N(1)-C(4)-O(1)    | 168.21(16)  |
| C(5)-N(1)-C(4)-C(3)    | 168.56(13)  |
| C(1)-N(1)-C(4)-C(3)    | -11.02(16)  |
| C(19)-C(3)-C(4)-O(1)   | -54.4(2)    |
| C(2)-C(3)-C(4)-O(1)    | 176.83(15)  |
| C(19)-C(3)-C(4)-N(1)   | 124.88(13)  |

|                         |             |
|-------------------------|-------------|
| C(2)-C(3)-C(4)-N(1)     | -3.93(15)   |
| C(6)-O(2)-C(5)-O(3)     | -2.9(2)     |
| C(6)-O(2)-C(5)-N(1)     | 176.75(12)  |
| C(4)-N(1)-C(5)-O(3)     | 4.8(2)      |
| C(1)-N(1)-C(5)-O(3)     | -175.63(14) |
| C(4)-N(1)-C(5)-O(2)     | -174.87(13) |
| C(1)-N(1)-C(5)-O(2)     | 4.67(19)    |
| C(5)-O(2)-C(6)-C(8)     | -57.30(18)  |
| C(5)-O(2)-C(6)-C(9)     | 67.76(17)   |
| C(5)-O(2)-C(6)-C(7)     | -174.31(14) |
| S(1)-O(4)-C(10)-C(1)    | -159.67(10) |
| N(1)-C(1)-C(10)-O(4)    | 61.84(15)   |
| C(2)-C(1)-C(10)-O(4)    | -56.37(17)  |
| O(5)-S(1)-C(11)-C(16)   | -60.49(16)  |
| O(6)-S(1)-C(11)-C(16)   | 165.55(14)  |
| O(4)-S(1)-C(11)-C(16)   | 49.36(15)   |
| O(5)-S(1)-C(11)-C(12)   | 117.13(15)  |
| O(6)-S(1)-C(11)-C(12)   | -16.83(17)  |
| O(4)-S(1)-C(11)-C(12)   | -133.02(14) |
| C(16)-C(11)-C(12)-C(13) | 1.4(3)      |
| S(1)-C(11)-C(12)-C(13)  | -176.15(14) |
| C(11)-C(12)-C(13)-C(14) | -1.2(3)     |
| C(12)-C(13)-C(14)-C(15) | -0.2(3)     |
| C(12)-C(13)-C(14)-C(17) | -179.4(2)   |
| C(13)-C(14)-C(15)-C(16) | 1.4(3)      |
| C(17)-C(14)-C(15)-C(16) | -179.4(2)   |
| C(14)-C(15)-C(16)-C(11) | -1.1(3)     |
| C(12)-C(11)-C(16)-C(15) | -0.3(3)     |
| S(1)-C(11)-C(16)-C(15)  | 177.27(14)  |
| C(26)-Si(1)-C(20)-C(22) | 73.32(14)   |
| C(23)-Si(1)-C(20)-C(22) | -173.20(12) |
| C(2)-Si(1)-C(20)-C(22)  | -47.66(15)  |
| C(26)-Si(1)-C(20)-C(21) | -157.34(13) |
| C(23)-Si(1)-C(20)-C(21) | -43.86(16)  |
| C(2)-Si(1)-C(20)-C(21)  | 81.68(15)   |
| C(26)-Si(1)-C(23)-C(25) | -162.64(13) |
| C(20)-Si(1)-C(23)-C(25) | 80.94(14)   |
| C(2)-Si(1)-C(23)-C(25)  | -44.47(14)  |

---

|                         |             |
|-------------------------|-------------|
| C(26)-Si(1)-C(23)-C(24) | 69.81(13)   |
| C(20)-Si(1)-C(23)-C(24) | -46.61(14)  |
| C(2)-Si(1)-C(23)-C(24)  | -172.02(11) |
| C(23)-Si(1)-C(26)-C(27) | -123.60(14) |
| C(20)-Si(1)-C(26)-C(27) | -5.06(16)   |
| C(2)-Si(1)-C(26)-C(27)  | 116.93(13)  |
| C(23)-Si(1)-C(26)-C(31) | 51.62(14)   |
| C(20)-Si(1)-C(26)-C(31) | 170.16(12)  |
| C(2)-Si(1)-C(26)-C(31)  | -67.85(14)  |
| C(31)-C(26)-C(27)-C(28) | -0.7(2)     |
| Si(1)-C(26)-C(27)-C(28) | 174.69(13)  |
| C(26)-C(27)-C(28)-C(29) | 0.2(3)      |
| C(27)-C(28)-C(29)-C(30) | 0.4(3)      |
| C(28)-C(29)-C(30)-C(31) | -0.5(3)     |
| C(29)-C(30)-C(31)-C(26) | 0.0(3)      |
| C(27)-C(26)-C(31)-C(30) | 0.6(2)      |
| Si(1)-C(26)-C(31)-C(30) | -174.93(13) |

---



X-ray Data Collection, Structure Solution and Refinement for *N*-Toluenesulfonamide **S21**.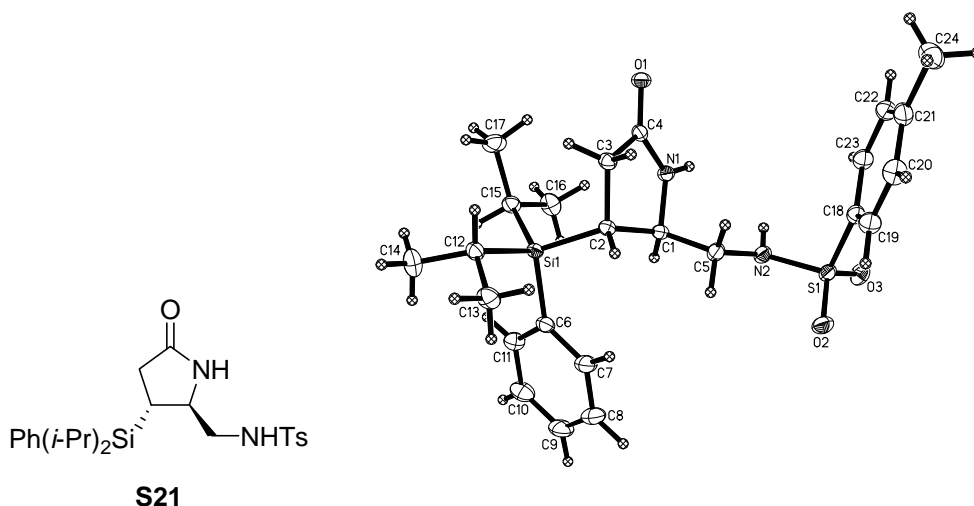

A colorless crystal of approximate dimensions 0.23 x 0.35 x 0.41 mm was mounted on a glass fiber and transferred to a Bruker CCD platform diffractometer. The SMART<sup>1</sup> program package was used to determine the unit-cell parameters and for data collection (25 sec/frame scan time for a sphere of diffraction data). The raw frame data was processed using SAINT<sup>2</sup> and SADABS<sup>3</sup> to yield the reflection data file. Subsequent calculations were carried out using the SHELXTL<sup>4</sup> program. The diffraction symmetry was *mmm* and the systematic absences were consistent with the orthorhombic space group *Pbca* which was later determined to be correct.

The structure was solved by direct methods and refined on F<sup>2</sup> by full-matrix least-squares techniques. The analytical scattering factors<sup>5</sup> for neutral atoms were used throughout the analysis. Hydrogen atoms were located from a difference-Fourier map and refined (x,y,z and U<sub>iso</sub>). At convergence, wR2 = 0.0986 and GOF = 1.101 for 416 variables refined against 6055 data (0.75 Å), R1 = 0.0370 for those 5075 data with I > 2.0σ(I).

## References.

1. SMART Software Users Guide, Version 5.1, Bruker Analytical X-Ray Systems, Inc.; Madison, WI 1999.
2. SAINT Software Users Guide, Version 6.0, Bruker Analytical X-Ray Systems, Inc.; Madison, WI 1999.
3. Sheldrick, G. M. SADABS, Version 2.10, Bruker Analytical X-Ray Systems, Inc.; Madison, WI 2002.
4. Sheldrick, G. M. SHELXTL Version 6.12, Bruker Analytical X-Ray Systems, Inc.; Madison, WI 2001.
5. International Tables for X-Ray Crystallography 1992, Vol. C., Dordrecht: Kluwer Academic Publishers.

## Definitions:

$$wR2 = [\Sigma[w(F_o^2 - F_c^2)^2] / \Sigma[w(F_o^2)^2]]^{1/2}$$

$$R1 = \Sigma||F_o| - |F_c|| / \Sigma|F_o|$$

Goof = S =  $[\Sigma[w(F_o^2 - F_c^2)^2] / (n-p)]^{1/2}$  where n is the number of reflections and p is the total number of parameters refined.

The thermal ellipsoid plot is shown at the 50% probability level.

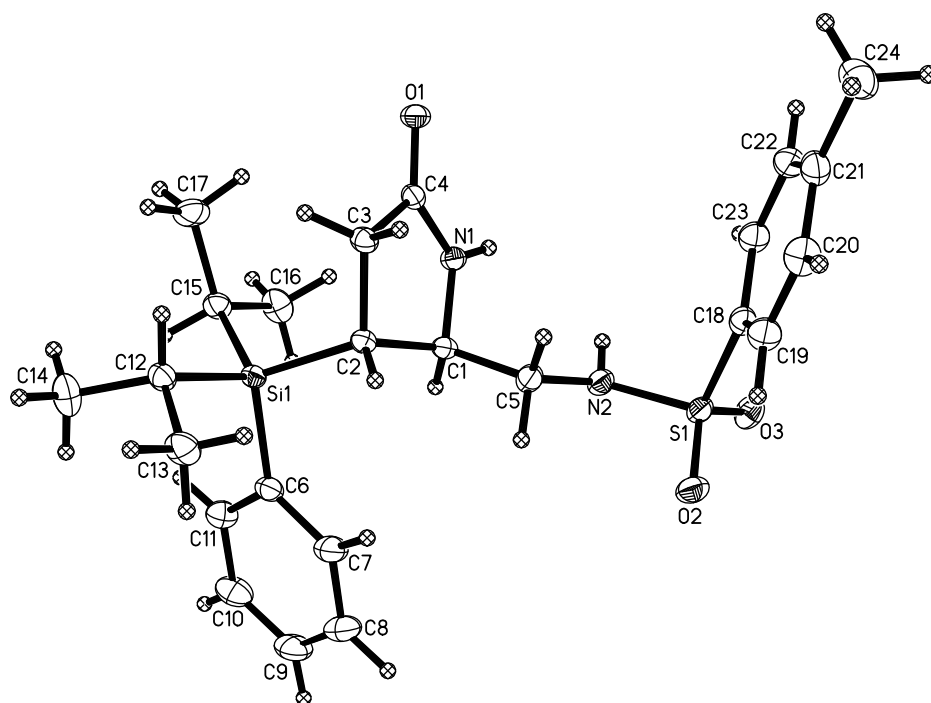Table 1. Crystal data and structure refinement for *N*-toluenesulfonamide **S21**.

|                                                                 |                                                                                                                                                  |
|-----------------------------------------------------------------|--------------------------------------------------------------------------------------------------------------------------------------------------|
| Identification code                                             | kaw91 (Nick Leonard)                                                                                                                             |
| Empirical formula                                               | C <sub>24</sub> H <sub>34</sub> N <sub>2</sub> O <sub>3</sub> S Si                                                                               |
| Formula weight                                                  | 458.68                                                                                                                                           |
| Temperature                                                     | 163(2) K                                                                                                                                         |
| Wavelength                                                      | 0.71073 Å                                                                                                                                        |
| Crystal system                                                  | Orthorhombic                                                                                                                                     |
| Space group                                                     | <i>Pbca</i>                                                                                                                                      |
| Unit cell dimensions                                            | <i>a</i> = 16.431(3) Å $\square = 90^\circ$ ,<br><i>b</i> = 7.8966(13) Å $\square = 90^\circ$ ,<br><i>c</i> = 37.563(6) Å $\square = 90^\circ$ . |
| Volume                                                          | 4873.6(14) Å <sup>3</sup>                                                                                                                        |
| <i>Z</i>                                                        | 8                                                                                                                                                |
| Density (calculated)                                            | 1.250 Mg/m <sup>3</sup>                                                                                                                          |
| Absorption coefficient                                          | 0.209 mm <sup>-1</sup>                                                                                                                           |
| <i>F</i> (000)                                                  | 1968                                                                                                                                             |
| Crystal color                                                   | colorless                                                                                                                                        |
| Crystal size                                                    | 0.41 x 0.35 x 0.23 mm <sup>3</sup>                                                                                                               |
| Theta range for data collection                                 | 1.65 to 28.29°                                                                                                                                   |
| Index ranges                                                    | -21 ≤ <i>h</i> ≤ 21, -10 ≤ <i>k</i> ≤ 10, -50 ≤ <i>l</i> ≤ 49                                                                                    |
| Reflections collected                                           | 50243                                                                                                                                            |
| Independent reflections                                         | 6055 [R(int) = 0.0376]                                                                                                                           |
| Completeness to theta = 28.29°                                  | 99.9 %                                                                                                                                           |
| Absorption correction                                           | Semi-empirical from equivalents                                                                                                                  |
| Max. and min. transmission                                      | 0.9534 and 0.9190                                                                                                                                |
| Refinement method                                               | Full-matrix least-squares on <i>F</i> <sup>2</sup>                                                                                               |
| Data / restraints / parameters                                  | 6055 / 0 / 416                                                                                                                                   |
| Goodness-of-fit on <i>F</i> <sup>2</sup>                        | 1.101                                                                                                                                            |
| Final <i>R</i> indices [ <i>I</i> > 2σ( <i>I</i> ) = 5075 data] | <i>R</i> 1 = 0.0370, <i>wR</i> 2 = 0.0914                                                                                                        |
| <i>R</i> indices (all data, 0.75 Å)                             | <i>R</i> 1 = 0.0481, <i>wR</i> 2 = 0.0986                                                                                                        |

Largest diff. peak and hole 0.518 and -0.378 e.Å<sup>-3</sup>

Table 2. Atomic coordinates ( $\times 10^4$ ) and equivalent isotropic displacement parameters ( $\text{\AA}^2 \times 10^3$ ) for *N*-toluenesulfonamide **S21**. U(eq) is defined as one third of the trace of the orthogonalized  $U^{ij}$  tensor.

|       | x       | y        | z       | U(eq) |
|-------|---------|----------|---------|-------|
| S(1)  | 5578(1) | 7796(1)  | 2057(1) | 18(1) |
| Si(1) | 5177(1) | 14046(1) | 838(1)  | 15(1) |
| O(1)  | 7788(1) | 12815(1) | 1238(1) | 21(1) |
| O(2)  | 4793(1) | 8308(1)  | 2184(1) | 24(1) |
| O(3)  | 5741(1) | 6037(1)  | 1994(1) | 24(1) |
| N(1)  | 6640(1) | 11177(2) | 1225(1) | 16(1) |
| N(2)  | 5726(1) | 8756(2)  | 1678(1) | 18(1) |
| C(1)  | 5764(1) | 11292(2) | 1296(1) | 16(1) |
| C(2)  | 5600(1) | 13225(2) | 1276(1) | 15(1) |
| C(3)  | 6439(1) | 13998(2) | 1368(1) | 17(1) |
| C(4)  | 7038(1) | 12634(2) | 1270(1) | 16(1) |
| C(5)  | 5559(1) | 10582(2) | 1663(1) | 19(1) |
| C(6)  | 4231(1) | 12791(2) | 734(1)  | 19(1) |
| C(7)  | 3762(1) | 12024(2) | 999(1)  | 27(1) |
| C(8)  | 3076(1) | 11062(3) | 919(1)  | 34(1) |
| C(9)  | 2837(1) | 10853(2) | 569(1)  | 32(1) |
| C(10) | 3280(1) | 11611(2) | 300(1)  | 30(1) |
| C(11) | 3967(1) | 12563(2) | 382(1)  | 24(1) |
| C(12) | 4917(1) | 16353(2) | 912(1)  | 18(1) |
| C(13) | 4268(1) | 16570(2) | 1202(1) | 25(1) |
| C(14) | 4646(1) | 17248(2) | 569(1)  | 30(1) |
| C(15) | 5887(1) | 13842(2) | 442(1)  | 20(1) |
| C(16) | 6112(1) | 12019(2) | 341(1)  | 27(1) |
| C(17) | 6656(1) | 14950(2) | 464(1)  | 28(1) |
| C(18) | 6321(1) | 8573(2)  | 2354(1) | 18(1) |
| C(19) | 6084(1) | 9511(2)  | 2649(1) | 23(1) |
| C(20) | 6681(1) | 10098(2) | 2881(1) | 26(1) |
| C(21) | 7502(1) | 9782(2)  | 2819(1) | 23(1) |
| C(22) | 7726(1) | 8862(2)  | 2517(1) | 23(1) |
| C(23) | 7141(1) | 8254(2)  | 2285(1) | 22(1) |
| C(24) | 8143(1) | 10423(3) | 3071(1) | 33(1) |

Table 3. Bond lengths [ $\text{\AA}$ ] and angles [ $^\circ$ ] for *N*-toluenesulfonamide **S21**.

|             |            |
|-------------|------------|
| S(1)-O(2)   | 1.4336(11) |
| S(1)-O(3)   | 1.4346(12) |
| S(1)-N(2)   | 1.6335(13) |
| S(1)-C(18)  | 1.7639(15) |
| Si(1)-C(6)  | 1.8852(15) |
| Si(1)-C(12) | 1.8919(15) |
| Si(1)-C(15) | 1.8971(15) |
| Si(1)-C(2)  | 1.8987(15) |
| O(1)-C(4)   | 1.2455(17) |
| N(1)-C(4)   | 1.3342(18) |
| N(1)-C(1)   | 1.4669(17) |
| N(2)-C(5)   | 1.4688(19) |
| C(1)-C(5)   | 1.5257(19) |
| C(1)-C(2)   | 1.5515(19) |
| C(2)-C(3)   | 1.5460(19) |
| C(3)-C(4)   | 1.5053(19) |

|                   |            |
|-------------------|------------|
| C(6)-C(7)         | 1.399(2)   |
| C(6)-C(11)        | 1.403(2)   |
| C(7)-C(8)         | 1.393(2)   |
| C(8)-C(9)         | 1.382(3)   |
| C(9)-C(10)        | 1.380(3)   |
| C(10)-C(11)       | 1.391(2)   |
| C(12)-C(13)       | 1.532(2)   |
| C(12)-C(14)       | 1.536(2)   |
| C(15)-C(16)       | 1.535(2)   |
| C(15)-C(17)       | 1.540(2)   |
| C(18)-C(19)       | 1.388(2)   |
| C(18)-C(23)       | 1.395(2)   |
| C(19)-C(20)       | 1.390(2)   |
| C(20)-C(21)       | 1.392(2)   |
| C(21)-C(22)       | 1.396(2)   |
| C(21)-C(24)       | 1.503(2)   |
| C(22)-C(23)       | 1.384(2)   |
| O(2)-S(1)-O(3)    | 119.78(7)  |
| O(2)-S(1)-N(2)    | 107.06(7)  |
| O(3)-S(1)-N(2)    | 106.02(7)  |
| O(2)-S(1)-C(18)   | 108.29(7)  |
| O(3)-S(1)-C(18)   | 108.25(7)  |
| N(2)-S(1)-C(18)   | 106.76(7)  |
| C(6)-Si(1)-C(12)  | 110.51(6)  |
| C(6)-Si(1)-C(15)  | 107.36(7)  |
| C(12)-Si(1)-C(15) | 109.63(7)  |
| C(6)-Si(1)-C(2)   | 107.67(6)  |
| C(12)-Si(1)-C(2)  | 106.49(6)  |
| C(15)-Si(1)-C(2)  | 115.16(6)  |
| C(4)-N(1)-C(1)    | 113.86(12) |
| C(5)-N(2)-S(1)    | 117.39(10) |
| N(1)-C(1)-C(5)    | 110.97(11) |
| N(1)-C(1)-C(2)    | 102.86(11) |
| C(5)-C(1)-C(2)    | 111.58(12) |
| C(3)-C(2)-C(1)    | 102.86(11) |
| C(3)-C(2)-Si(1)   | 112.66(10) |
| C(1)-C(2)-Si(1)   | 116.22(10) |
| C(4)-C(3)-C(2)    | 104.25(11) |
| O(1)-C(4)-N(1)    | 124.89(13) |
| O(1)-C(4)-C(3)    | 126.02(13) |
| N(1)-C(4)-C(3)    | 109.08(12) |
| N(2)-C(5)-C(1)    | 110.66(12) |
| C(7)-C(6)-C(11)   | 116.56(14) |
| C(7)-C(6)-Si(1)   | 122.18(12) |
| C(11)-C(6)-Si(1)  | 121.26(11) |
| C(8)-C(7)-C(6)    | 121.80(16) |
| C(9)-C(8)-C(7)    | 120.12(17) |
| C(10)-C(9)-C(8)   | 119.55(16) |
| C(9)-C(10)-C(11)  | 120.18(16) |
| C(10)-C(11)-C(6)  | 121.78(15) |
| C(13)-C(12)-C(14) | 110.01(13) |
| C(13)-C(12)-Si(1) | 111.68(11) |
| C(14)-C(12)-Si(1) | 112.66(11) |
| C(16)-C(15)-C(17) | 110.36(13) |
| C(16)-C(15)-Si(1) | 114.98(11) |
| C(17)-C(15)-Si(1) | 114.50(11) |
| C(19)-C(18)-C(23) | 121.14(14) |
| C(19)-C(18)-S(1)  | 119.75(11) |
| C(23)-C(18)-S(1)  | 119.10(11) |

|                   |            |
|-------------------|------------|
| C(18)-C(19)-C(20) | 118.59(14) |
| C(19)-C(20)-C(21) | 121.36(15) |
| C(20)-C(21)-C(22) | 118.96(14) |
| C(20)-C(21)-C(24) | 120.90(15) |
| C(22)-C(21)-C(24) | 120.14(15) |
| C(23)-C(22)-C(21) | 120.60(14) |
| C(22)-C(23)-C(18) | 119.34(14) |

Table 4. Anisotropic displacement parameters ( $\text{\AA}^2 \times 10^3$ ) for *N*-toluenesulfonamide **S21**. The anisotropic displacement factor exponent takes the form:  $-2 \square^2 [h^2 a^{*2} U^{11} + \dots + 2 h k a^* b^* U^{12}]$

|       | U <sup>11</sup> | U <sup>22</sup> | U <sup>33</sup> | U <sup>23</sup> | U <sup>13</sup> | U <sup>12</sup> |
|-------|-----------------|-----------------|-----------------|-----------------|-----------------|-----------------|
| S(1)  | 17(1)           | 16(1)           | 20(1)           | 2(1)            | 3(1)            | -1(1)           |
| Si(1) | 12(1)           | 16(1)           | 16(1)           | 1(1)            | 0(1)            | 1(1)            |
| O(1)  | 13(1)           | 16(1)           | 33(1)           | 1(1)            | -2(1)           | -1(1)           |
| O(2)  | 17(1)           | 25(1)           | 29(1)           | 3(1)            | 6(1)            | -1(1)           |
| O(3)  | 29(1)           | 16(1)           | 28(1)           | 1(1)            | 5(1)            | -1(1)           |
| N(1)  | 13(1)           | 12(1)           | 23(1)           | 1(1)            | 1(1)            | 1(1)            |
| N(2)  | 17(1)           | 18(1)           | 20(1)           | 2(1)            | 3(1)            | 0(1)            |
| C(1)  | 12(1)           | 16(1)           | 20(1)           | 1(1)            | -1(1)           | -1(1)           |
| C(2)  | 12(1)           | 16(1)           | 17(1)           | 1(1)            | 1(1)            | 1(1)            |
| C(3)  | 15(1)           | 14(1)           | 22(1)           | -1(1)           | -3(1)           | 1(1)            |
| C(4)  | 15(1)           | 15(1)           | 18(1)           | 1(1)            | -3(1)           | 1(1)            |
| C(5)  | 19(1)           | 17(1)           | 21(1)           | 2(1)            | 3(1)            | 0(1)            |
| C(6)  | 14(1)           | 19(1)           | 23(1)           | -1(1)           | -1(1)           | 2(1)            |
| C(7)  | 17(1)           | 36(1)           | 26(1)           | 4(1)            | -2(1)           | -4(1)           |
| C(8)  | 19(1)           | 44(1)           | 39(1)           | 8(1)            | -1(1)           | -9(1)           |
| C(9)  | 18(1)           | 32(1)           | 46(1)           | -3(1)           | -7(1)           | -6(1)           |
| C(10) | 24(1)           | 34(1)           | 32(1)           | -8(1)           | -9(1)           | -1(1)           |
| C(11) | 20(1)           | 27(1)           | 24(1)           | -2(1)           | -1(1)           | -1(1)           |
| C(12) | 17(1)           | 18(1)           | 20(1)           | 0(1)            | -1(1)           | 3(1)            |
| C(13) | 21(1)           | 26(1)           | 27(1)           | -2(1)           | 4(1)            | 6(1)            |
| C(14) | 39(1)           | 25(1)           | 26(1)           | 4(1)            | 0(1)            | 11(1)           |
| C(15) | 16(1)           | 24(1)           | 18(1)           | 1(1)            | 3(1)            | 2(1)            |
| C(16) | 28(1)           | 29(1)           | 23(1)           | -3(1)           | 3(1)            | 9(1)            |
| C(17) | 19(1)           | 39(1)           | 26(1)           | 2(1)            | 6(1)            | -3(1)           |
| C(18) | 19(1)           | 17(1)           | 19(1)           | 2(1)            | 2(1)            | 1(1)            |
| C(19) | 20(1)           | 24(1)           | 24(1)           | -1(1)           | 5(1)            | 5(1)            |
| C(20) | 29(1)           | 24(1)           | 23(1)           | -4(1)           | 3(1)            | 3(1)            |
| C(21) | 25(1)           | 22(1)           | 24(1)           | 4(1)            | -3(1)           | 0(1)            |
| C(22) | 18(1)           | 24(1)           | 28(1)           | 4(1)            | 2(1)            | 3(1)            |
| C(23) | 20(1)           | 23(1)           | 22(1)           | 1(1)            | 5(1)            | 3(1)            |
| C(24) | 32(1)           | 34(1)           | 31(1)           | 0(1)            | -9(1)           | 1(1)            |

Table 5. Hydrogen coordinates ( $\times 10^4$ ) and isotropic displacement parameters ( $\text{\AA}^2 \times 10^3$ ) for *N*-toluenesulfonamide **S21**.

|       | x        | y         | z       | U(eq) |
|-------|----------|-----------|---------|-------|
| H(1)  | 6877(12) | 10190(30) | 1194(5) | 26(5) |
| H(2)  | 6150(13) | 8490(30)  | 1590(5) | 32(5) |
| H(1A) | 5462(10) | 10630(20) | 1122(4) | 14(4) |
| H(2A) | 5213(11) | 13500(20) | 1461(5) | 25(5) |
| H(3A) | 6560(11) | 15040(20) | 1250(4) | 19(4) |
| H(3B) | 6486(12) | 14190(20) | 1619(5) | 28(5) |

|        |          |           |         |       |
|--------|----------|-----------|---------|-------|
| H(5A)  | 4975(12) | 10750(20) | 1714(5) | 25(5) |
| H(5B)  | 5869(11) | 11220(20) | 1844(5) | 23(5) |
| H(7A)  | 3888(12) | 12180(30) | 1249(5) | 32(5) |
| H(8A)  | 2757(13) | 10500(30) | 1109(6) | 41(6) |
| H(9A)  | 2379(13) | 10150(30) | 514(5)  | 34(5) |
| H(10A) | 3125(12) | 11490(30) | 72(5)   | 31(5) |
| H(11A) | 4266(12) | 13080(30) | 188(5)  | 32(5) |
| H(12A) | 5415(12) | 16920(20) | 1003(5) | 27(5) |
| H(13A) | 3769(14) | 16010(30) | 1136(6) | 41(6) |
| H(13B) | 4141(12) | 17770(30) | 1238(5) | 31(5) |
| H(13C) | 4443(12) | 16090(30) | 1427(5) | 30(5) |
| H(14A) | 5066(13) | 17220(30) | 399(6)  | 36(5) |
| H(14B) | 4501(13) | 18380(30) | 618(5)  | 37(5) |
| H(14C) | 4175(14) | 16690(30) | 461(6)  | 39(6) |
| H(15A) | 5547(11) | 14290(20) | 241(5)  | 27(5) |
| H(16A) | 5633(13) | 11290(30) | 317(5)  | 35(5) |
| H(16B) | 6404(12) | 11990(30) | 116(6)  | 35(5) |
| H(16C) | 6466(12) | 11510(30) | 522(5)  | 31(5) |
| H(17A) | 6540(12) | 16160(30) | 525(5)  | 32(5) |
| H(17B) | 6906(12) | 15050(30) | 231(6)  | 35(5) |
| H(17C) | 7060(14) | 14460(30) | 618(6)  | 41(6) |
| H(19A) | 5526(12) | 9690(30)  | 2696(5) | 29(5) |
| H(20A) | 6518(12) | 10760(30) | 3080(5) | 32(5) |
| H(22A) | 8270(12) | 8640(20)  | 2468(5) | 29(5) |
| H(23A) | 7278(11) | 7610(20)  | 2083(5) | 23(5) |
| H(24A) | 8285(15) | 9540(30)  | 3236(7) | 54(7) |
| H(24B) | 7909(15) | 11350(40) | 3209(7) | 58(7) |
| H(24C) | 8598(18) | 10830(40) | 2948(7) | 71(9) |

Table 6. Torsion angles [°] for *N*-toluenesulfonamide **S21**.

|                       |             |
|-----------------------|-------------|
| O(2)-S(1)-N(2)-C(5)   | 48.07(12)   |
| O(3)-S(1)-N(2)-C(5)   | 177.02(11)  |
| C(18)-S(1)-N(2)-C(5)  | -67.72(12)  |
| C(4)-N(1)-C(1)-C(5)   | -101.27(14) |
| C(4)-N(1)-C(1)-C(2)   | 18.17(15)   |
| N(1)-C(1)-C(2)-C(3)   | -25.36(13)  |
| C(5)-C(1)-C(2)-C(3)   | 93.65(13)   |
| N(1)-C(1)-C(2)-Si(1)  | 98.21(11)   |
| C(5)-C(1)-C(2)-Si(1)  | -142.78(10) |
| C(6)-Si(1)-C(2)-C(3)  | 172.71(9)   |
| C(12)-Si(1)-C(2)-C(3) | -68.74(11)  |
| C(15)-Si(1)-C(2)-C(3) | 53.00(12)   |
| C(6)-Si(1)-C(2)-C(1)  | 54.39(11)   |
| C(12)-Si(1)-C(2)-C(1) | 172.94(10)  |
| C(15)-Si(1)-C(2)-C(1) | -65.32(12)  |
| C(1)-C(2)-C(3)-C(4)   | 24.49(14)   |
| Si(1)-C(2)-C(3)-C(4)  | -101.41(11) |
| C(1)-N(1)-C(4)-O(1)   | 176.95(13)  |
| C(1)-N(1)-C(4)-C(3)   | -2.31(16)   |
| C(2)-C(3)-C(4)-O(1)   | 166.02(14)  |
| C(2)-C(3)-C(4)-N(1)   | -14.73(15)  |
| S(1)-N(2)-C(5)-C(1)   | 177.43(9)   |
| N(1)-C(1)-C(5)-N(2)   | -65.41(15)  |
| C(2)-C(1)-C(5)-N(2)   | -179.47(11) |
| C(12)-Si(1)-C(6)-C(7) | -90.05(14)  |
| C(15)-Si(1)-C(6)-C(7) | 150.43(13)  |
| C(2)-Si(1)-C(6)-C(7)  | 25.89(15)   |

|                         |             |
|-------------------------|-------------|
| C(12)-Si(1)-C(6)-C(11)  | 90.78(13)   |
| C(15)-Si(1)-C(6)-C(11)  | -28.74(14)  |
| C(2)-Si(1)-C(6)-C(11)   | -153.29(12) |
| C(11)-C(6)-C(7)-C(8)    | 0.9(2)      |
| Si(1)-C(6)-C(7)-C(8)    | -178.26(14) |
| C(6)-C(7)-C(8)-C(9)     | -0.5(3)     |
| C(7)-C(8)-C(9)-C(10)    | -0.3(3)     |
| C(8)-C(9)-C(10)-C(11)   | 0.7(3)      |
| C(9)-C(10)-C(11)-C(6)   | -0.3(3)     |
| C(7)-C(6)-C(11)-C(10)   | -0.5(2)     |
| Si(1)-C(6)-C(11)-C(10)  | 178.69(13)  |
| C(6)-Si(1)-C(12)-C(13)  | 55.20(12)   |
| C(15)-Si(1)-C(12)-C(13) | 173.34(10)  |
| C(2)-Si(1)-C(12)-C(13)  | -61.46(12)  |
| C(6)-Si(1)-C(12)-C(14)  | -69.20(13)  |
| C(15)-Si(1)-C(12)-C(14) | 48.95(13)   |
| C(2)-Si(1)-C(12)-C(14)  | 174.14(11)  |
| C(6)-Si(1)-C(15)-C(16)  | -56.97(13)  |
| C(12)-Si(1)-C(15)-C(16) | -177.05(11) |
| C(2)-Si(1)-C(15)-C(16)  | 62.91(13)   |
| C(6)-Si(1)-C(15)-C(17)  | 173.68(11)  |
| C(12)-Si(1)-C(15)-C(17) | 53.59(13)   |
| C(2)-Si(1)-C(15)-C(17)  | -66.44(13)  |
| O(2)-S(1)-C(18)-C(19)   | -0.27(14)   |
| O(3)-S(1)-C(18)-C(19)   | -131.55(12) |
| N(2)-S(1)-C(18)-C(19)   | 114.70(13)  |
| O(2)-S(1)-C(18)-C(23)   | -179.21(12) |
| O(3)-S(1)-C(18)-C(23)   | 49.51(14)   |
| N(2)-S(1)-C(18)-C(23)   | -64.24(13)  |
| C(23)-C(18)-C(19)-C(20) | -1.5(2)     |
| S(1)-C(18)-C(19)-C(20)  | 179.53(12)  |
| C(18)-C(19)-C(20)-C(21) | 0.9(2)      |
| C(19)-C(20)-C(21)-C(22) | 0.3(2)      |
| C(19)-C(20)-C(21)-C(24) | 179.98(16)  |
| C(20)-C(21)-C(22)-C(23) | -0.9(2)     |
| C(24)-C(21)-C(22)-C(23) | 179.48(16)  |
| C(21)-C(22)-C(23)-C(18) | 0.2(2)      |
| C(19)-C(18)-C(23)-C(22) | 1.0(2)      |
| S(1)-C(18)-C(23)-C(22)  | 179.96(12)  |

## VIII. References

- (1) Pangborn, A. B.; Giardello, M. A.; Grubbs, R. H.; Rosen, R. K.; Timmers, F. J. *Organometallics* **1996**, *15*, 1518-1520.
- (2) Burchat, A. F.; Chong, J. M.; Nielsen, N. J. *Organometallics* **1997**, *542*, 281-283.
- (3) Fleming, I.; Newton, T. W.; Roessler, F. J. *J. Chem. Soc., Perkin Trans. 1* **1981**, 2527-2532.
- (4) Fleming, I.; Roberts, R. S.; Smith, S. C. *Tetrahedron Lett.* **1996**, *37*, 9395-9396.
- (5) Denmark, S. E.; Hurd, A. R.; Sacha, H. J. *J. Org. Chem.* **1997**, *62*, 1668-1674.
- (6) Guyot, B.; Pornet, J.; Miginiac, L. *J. Organomet. Chem.* **1989**, *373*, 279-288.
- (7) Gregg, B. T.; Cutler, A. R. *Organometallics* **1994**, *13*, 1039-1043.
- (8) Buynak, J. D.; Strickland, J. B.; Lamb, G. W.; Khasnis, D.; Modi, S.; Williams, D.; Zhang, H. M. *J. Org. Chem.* **1991**, *56*, 7076-7083.
- (9) Romero, A.; Woerpel, K. A. *Org. Lett.* **2006**, *8*, 2127-2130.
- (10) Lee, S. J.; Terrazas, M. S.; Pippel, D. J.; Beak, P. *J. Am. Chem. Soc.* **2003**, *125*, 7307-7312.
- (11) Jiang, M. X. W.; Rawat, M.; Wulff, W. D. *J. Am. Chem. Soc.* **2004**, *126*, 5970-5971.
- (12) D'Hooghe, M.; Van Brabandt, W.; De Kimpe, N. *J. Org. Chem.* **2004**, *69*, 2703-2710.
- (13) Coogan, M. P.; Stanton, L. S.; Walther, T. *J. Organomet. Chem.* **2003**, *677*, 125-132.

## IX. Spectral Data

F1 Woerpel  
h1 CDCl3 v nickle 33

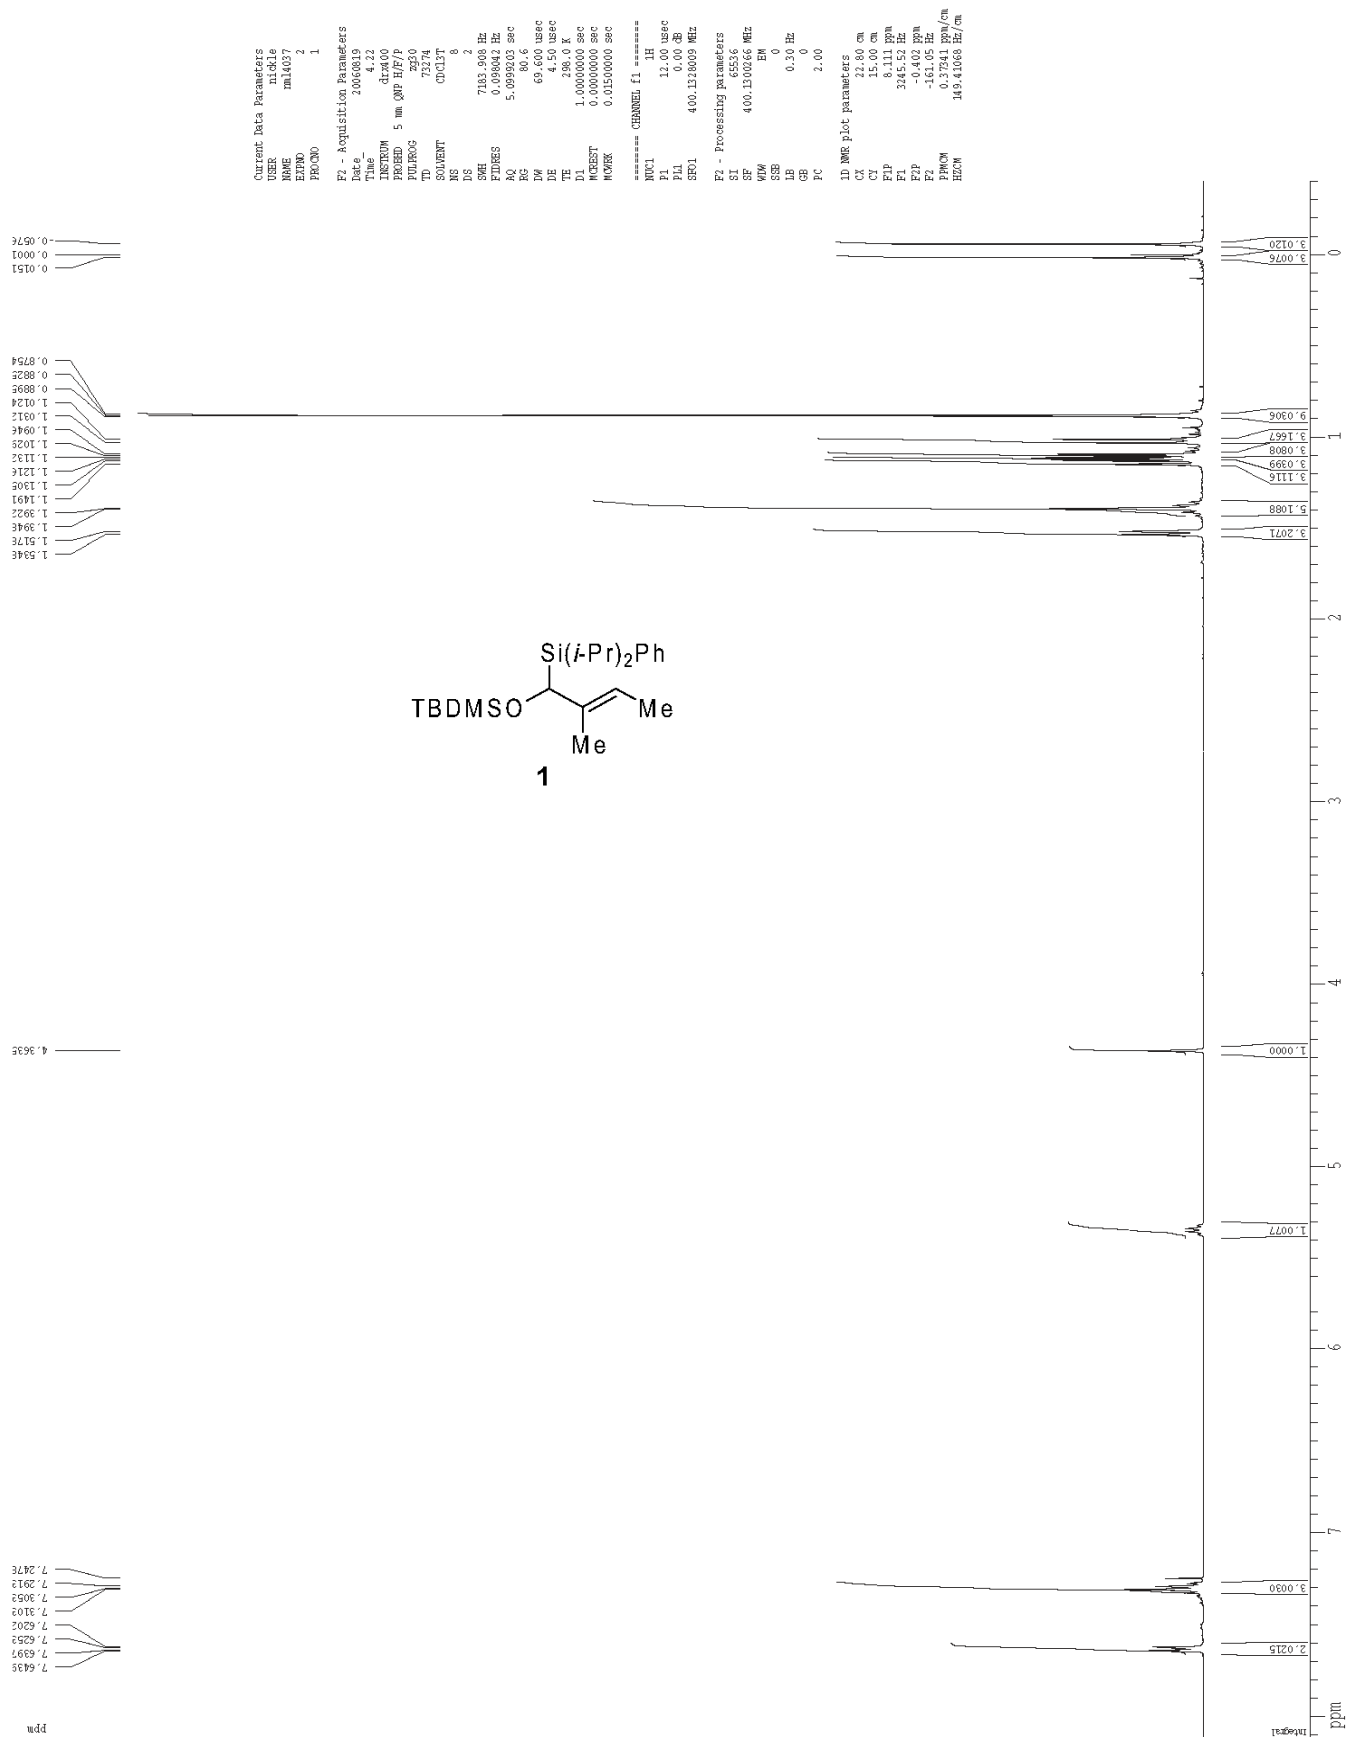



F1 Woerpel  
c13 CDCl3T v nickle 33

wdp

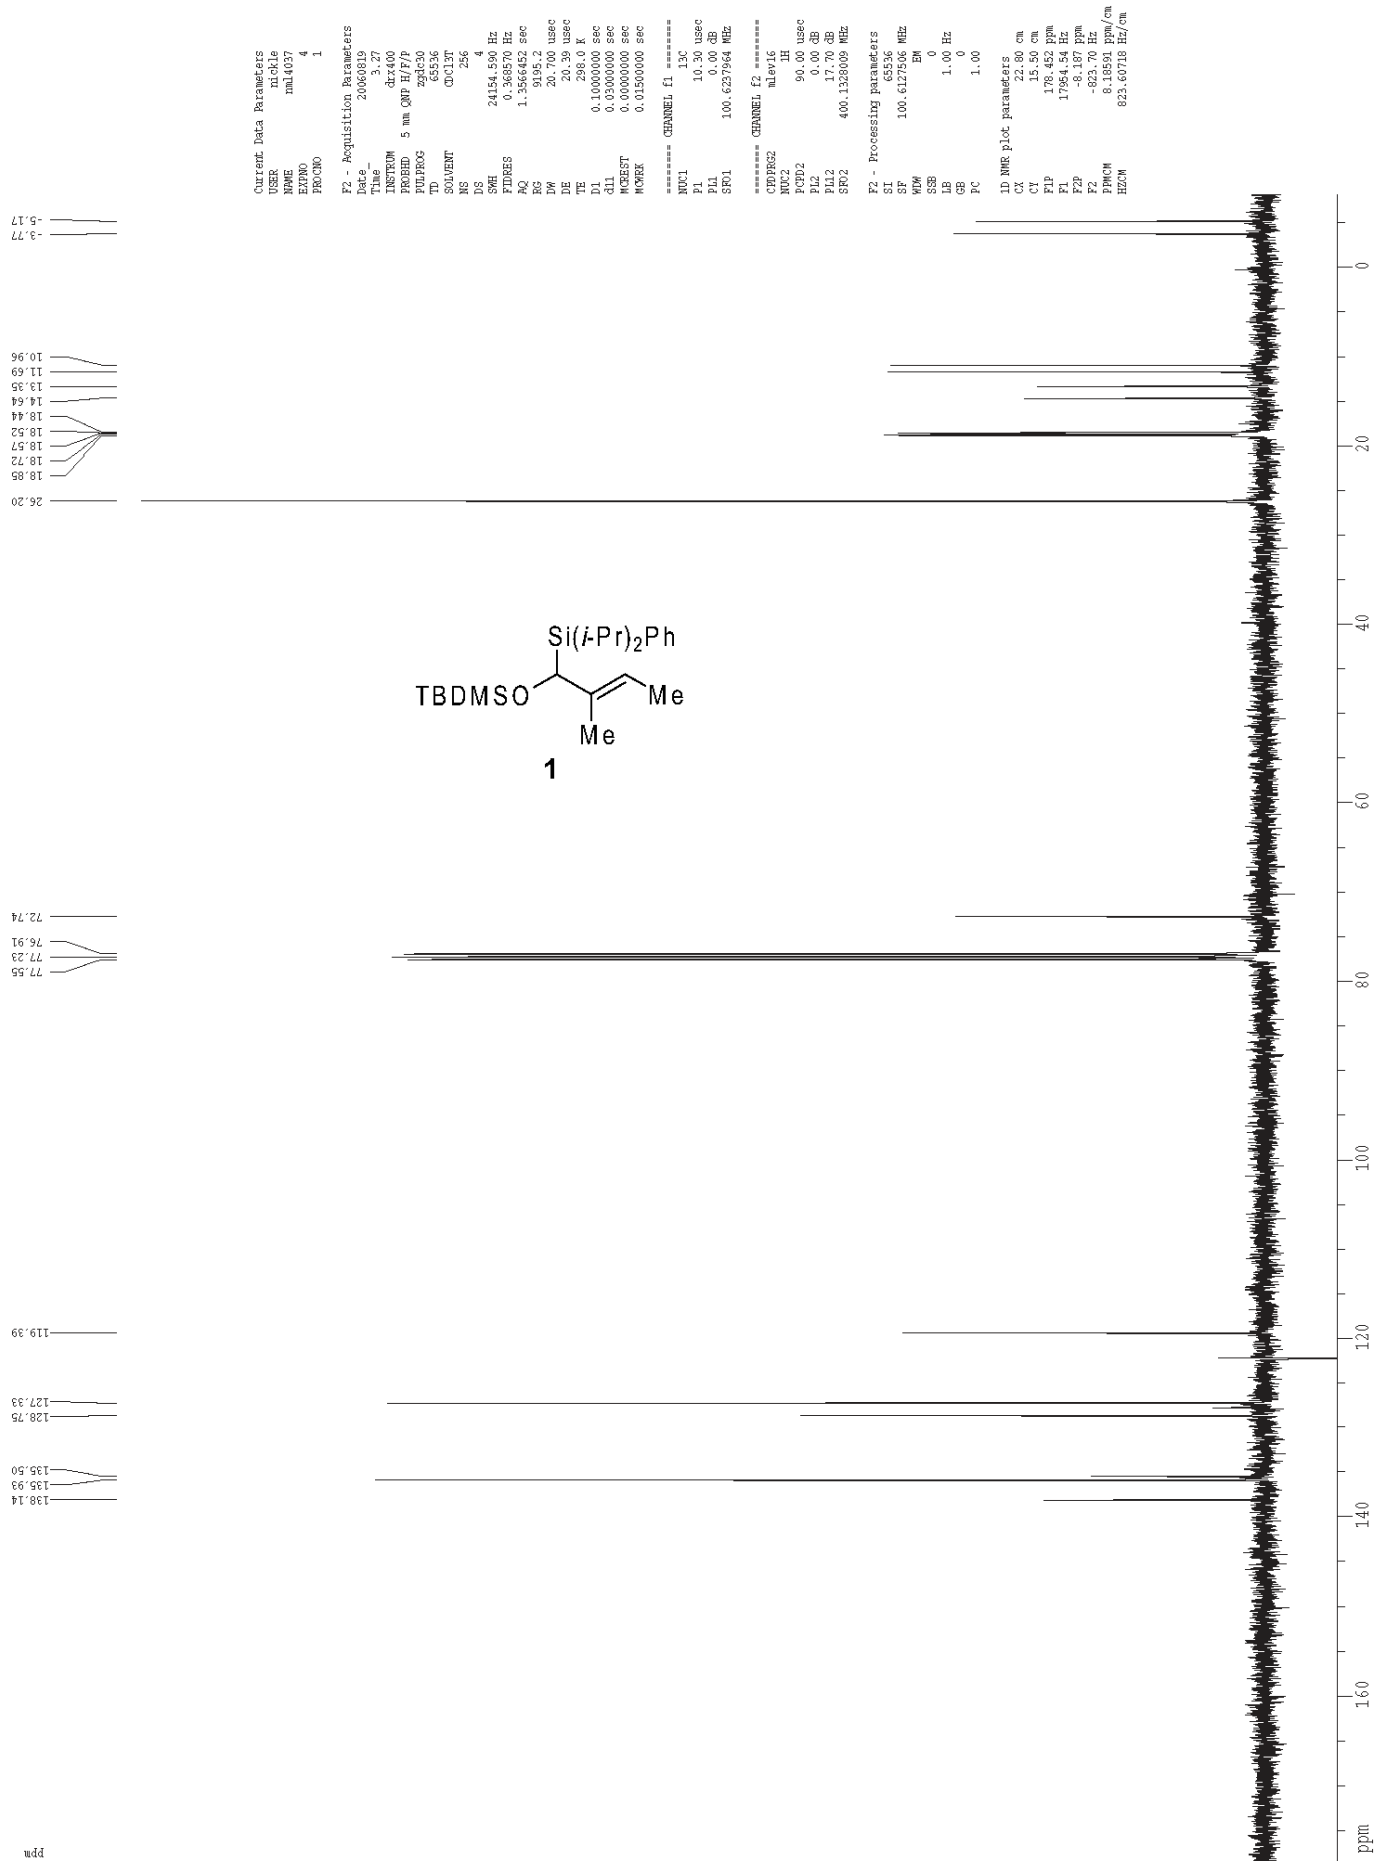

F1 Woerpel  
h1 CDCl3T v nickle 30

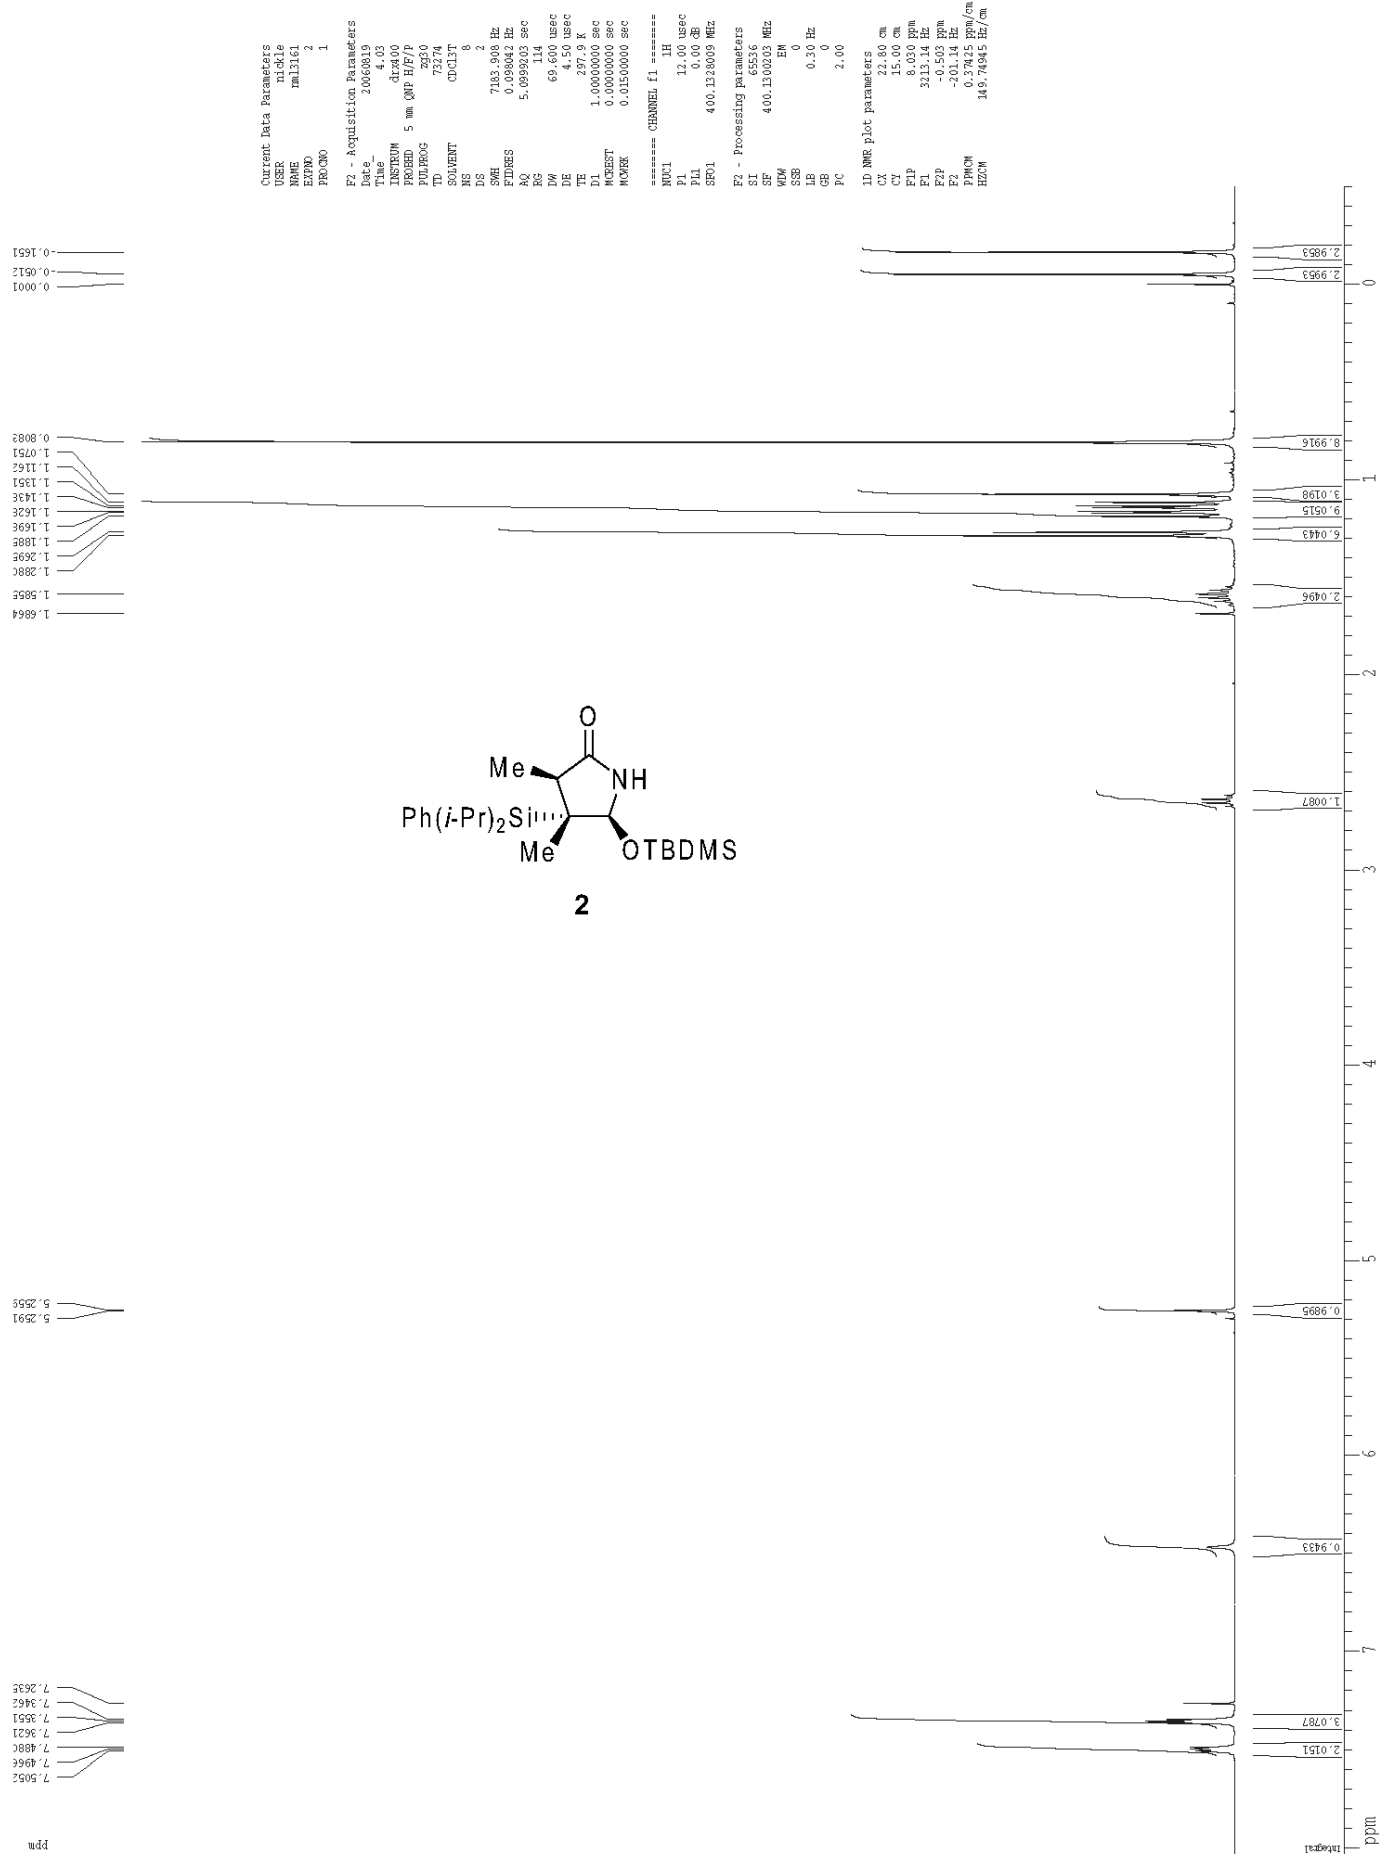

F1 Woerpel  
c13 CDCl3T v nickle 30

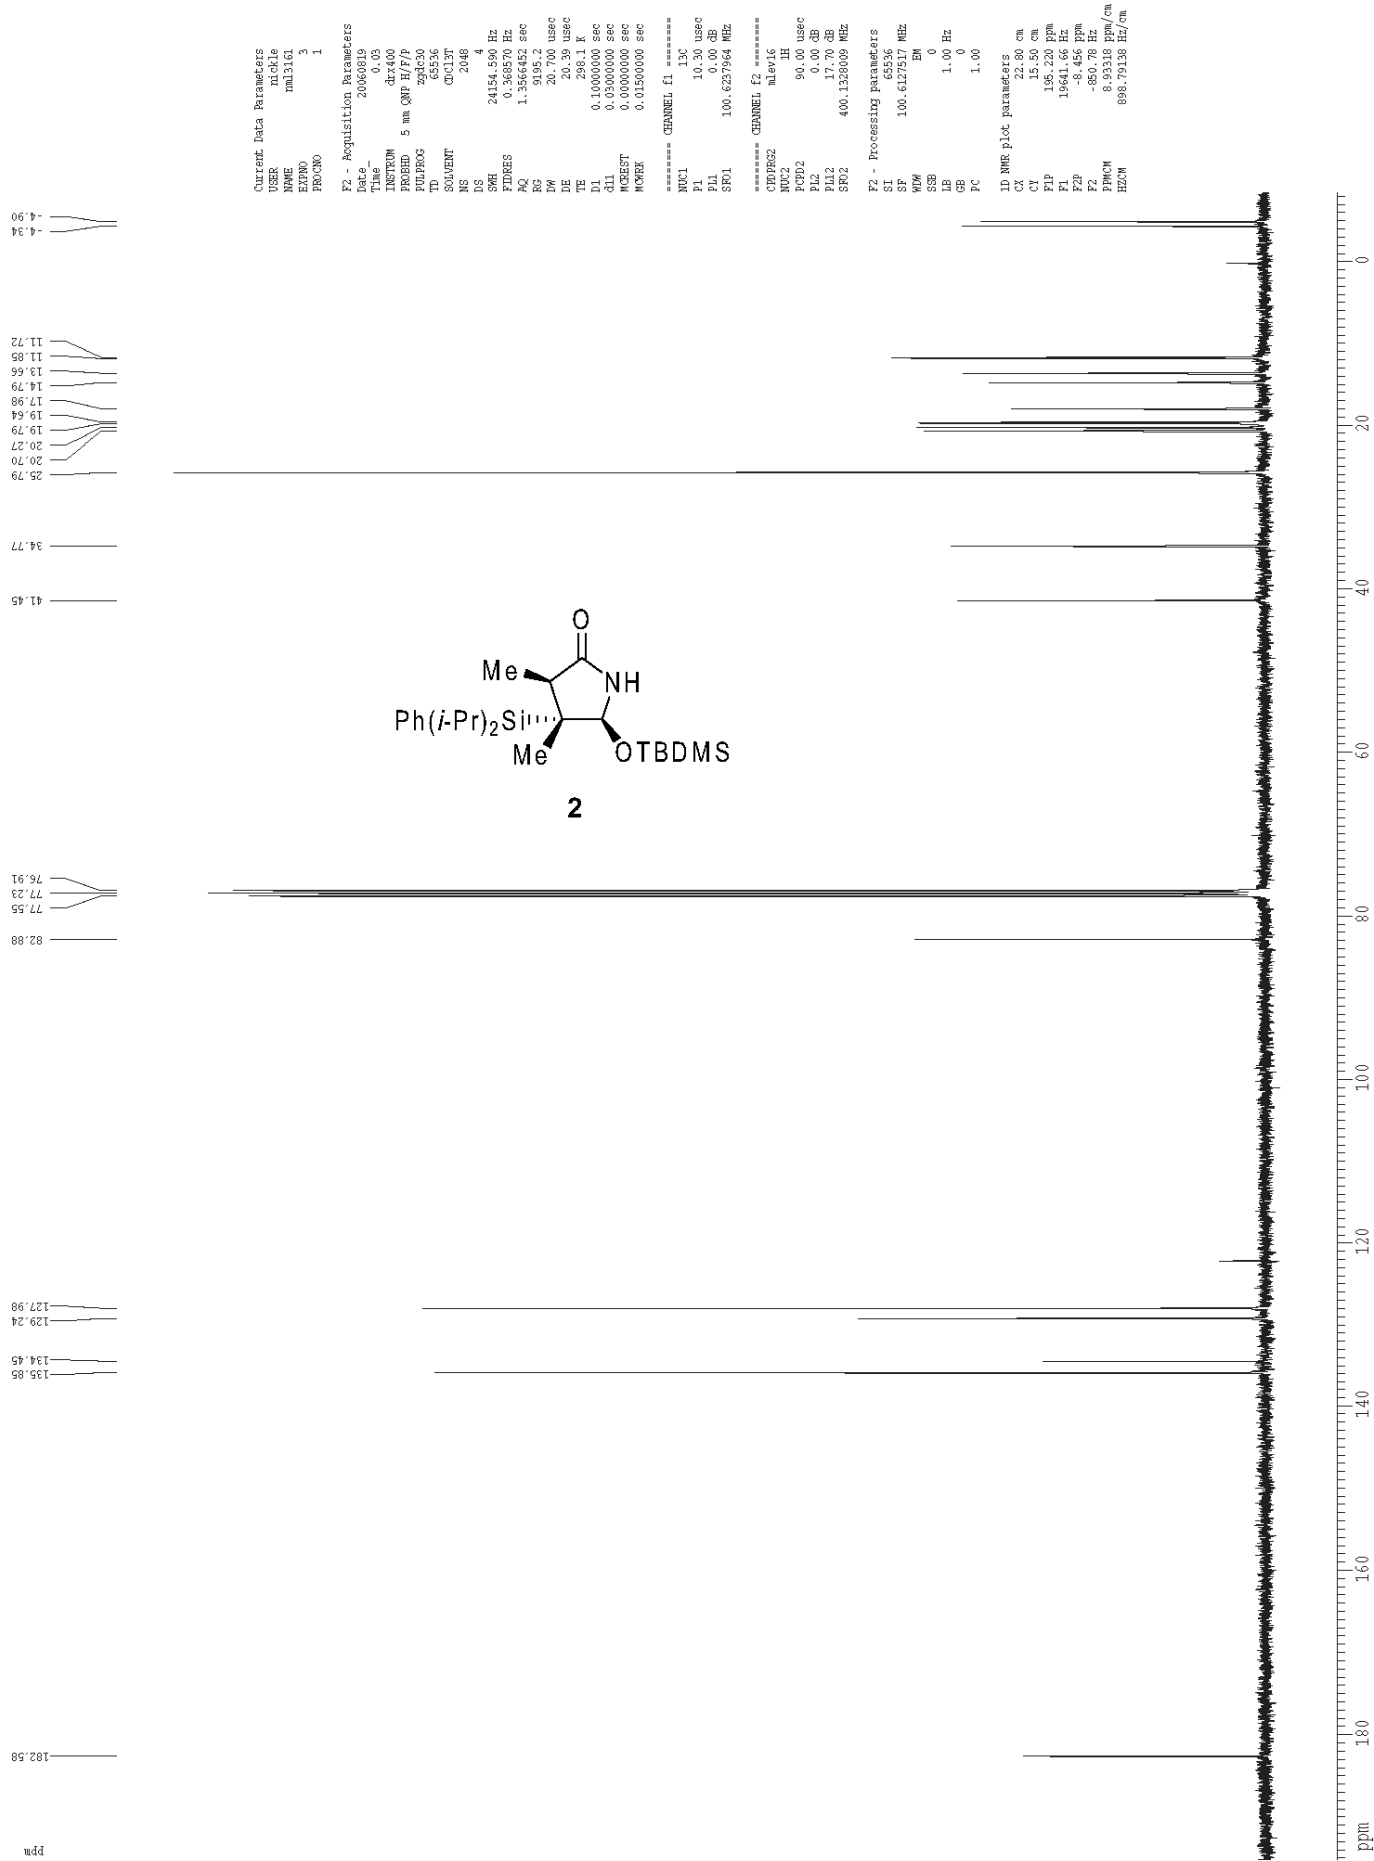

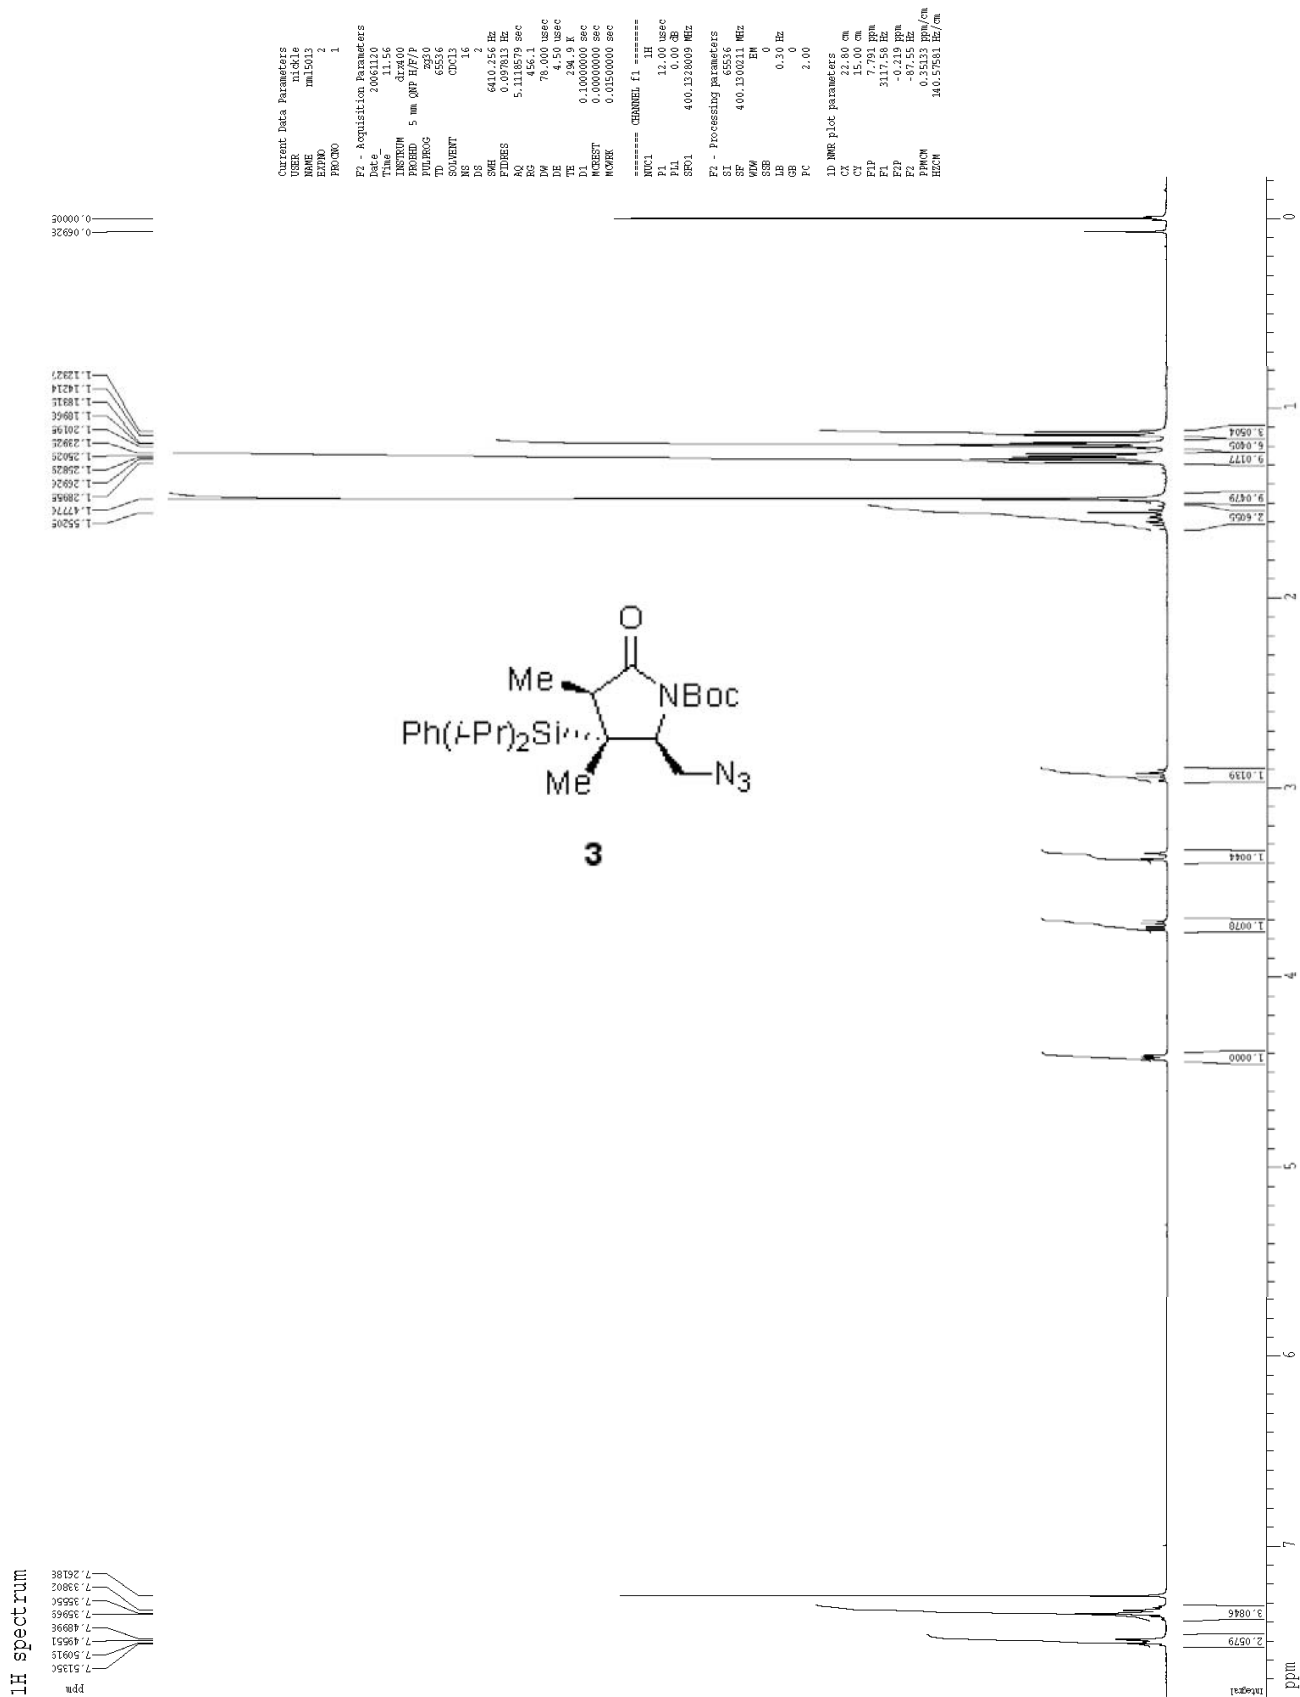



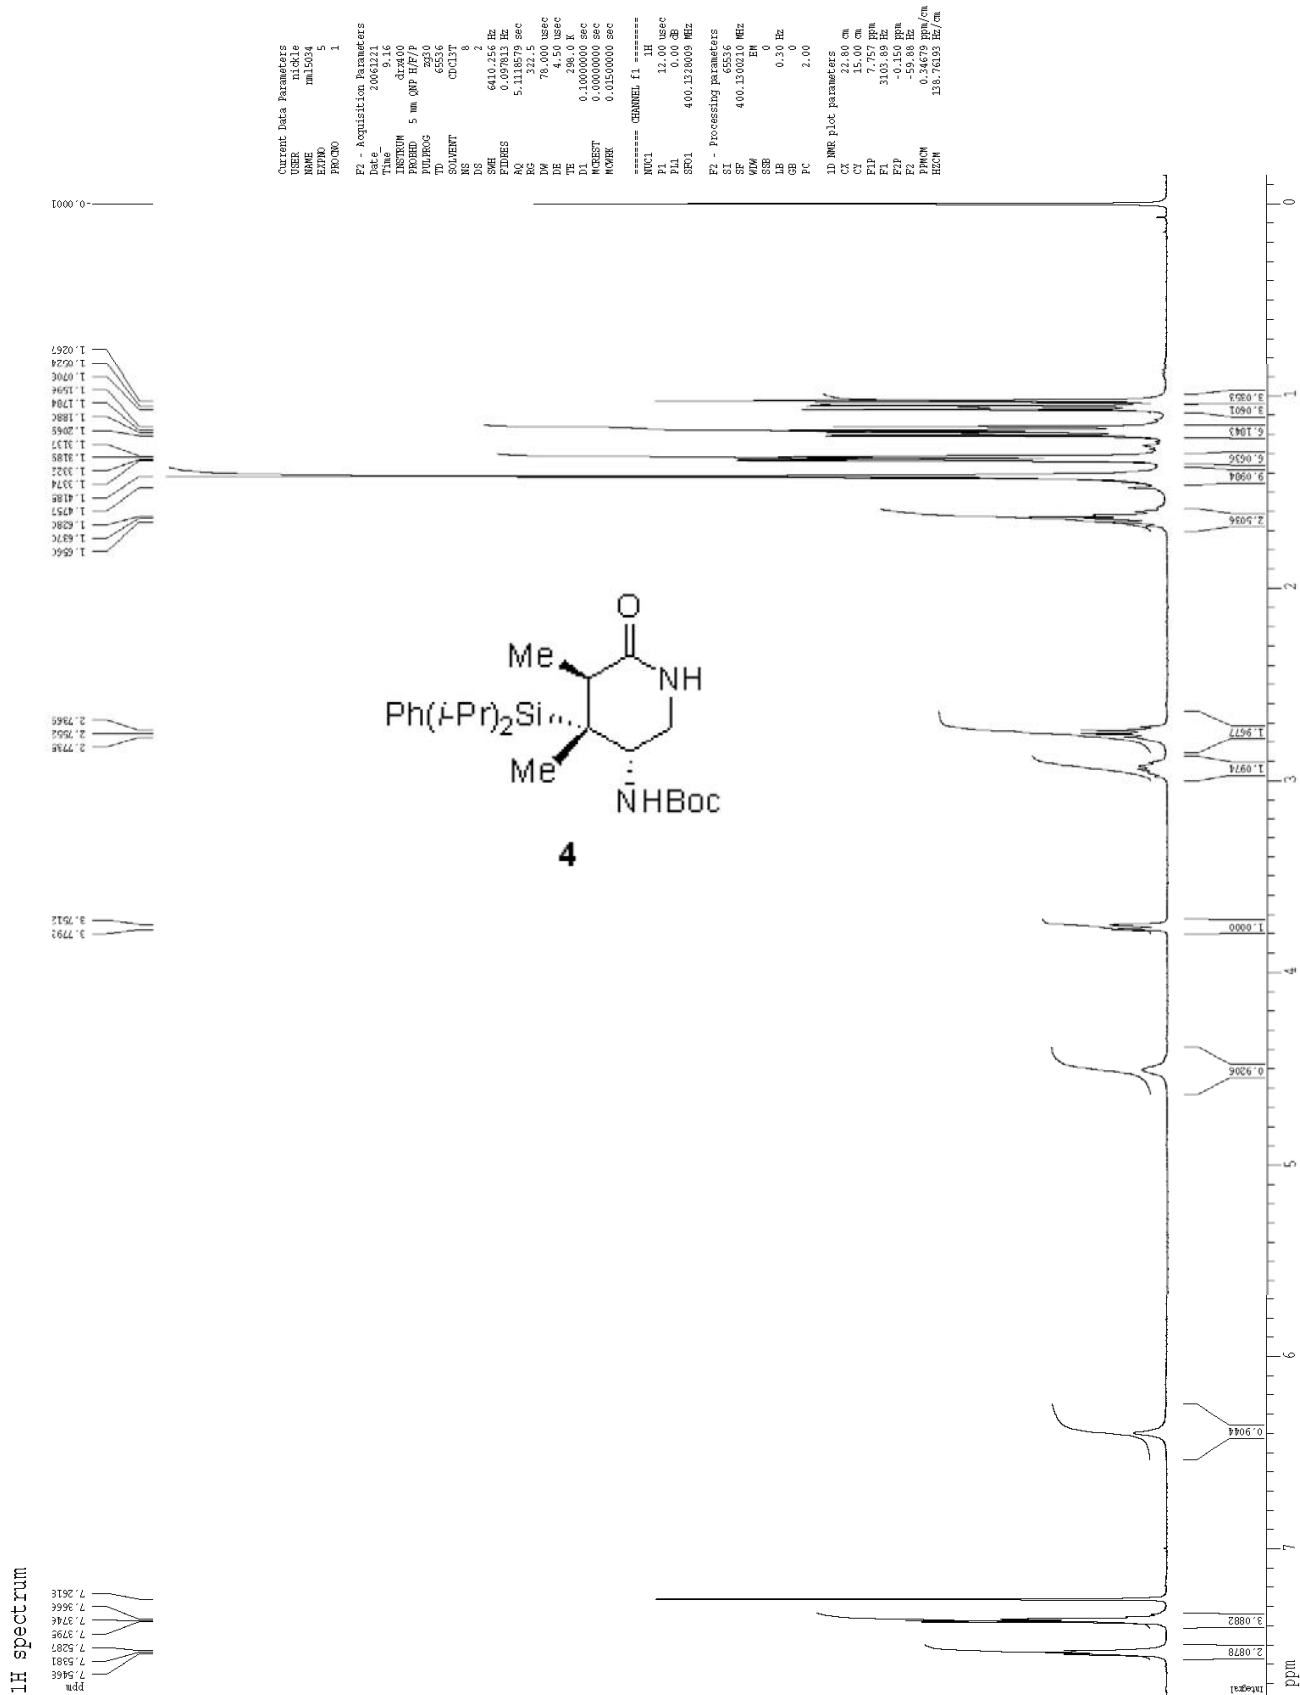



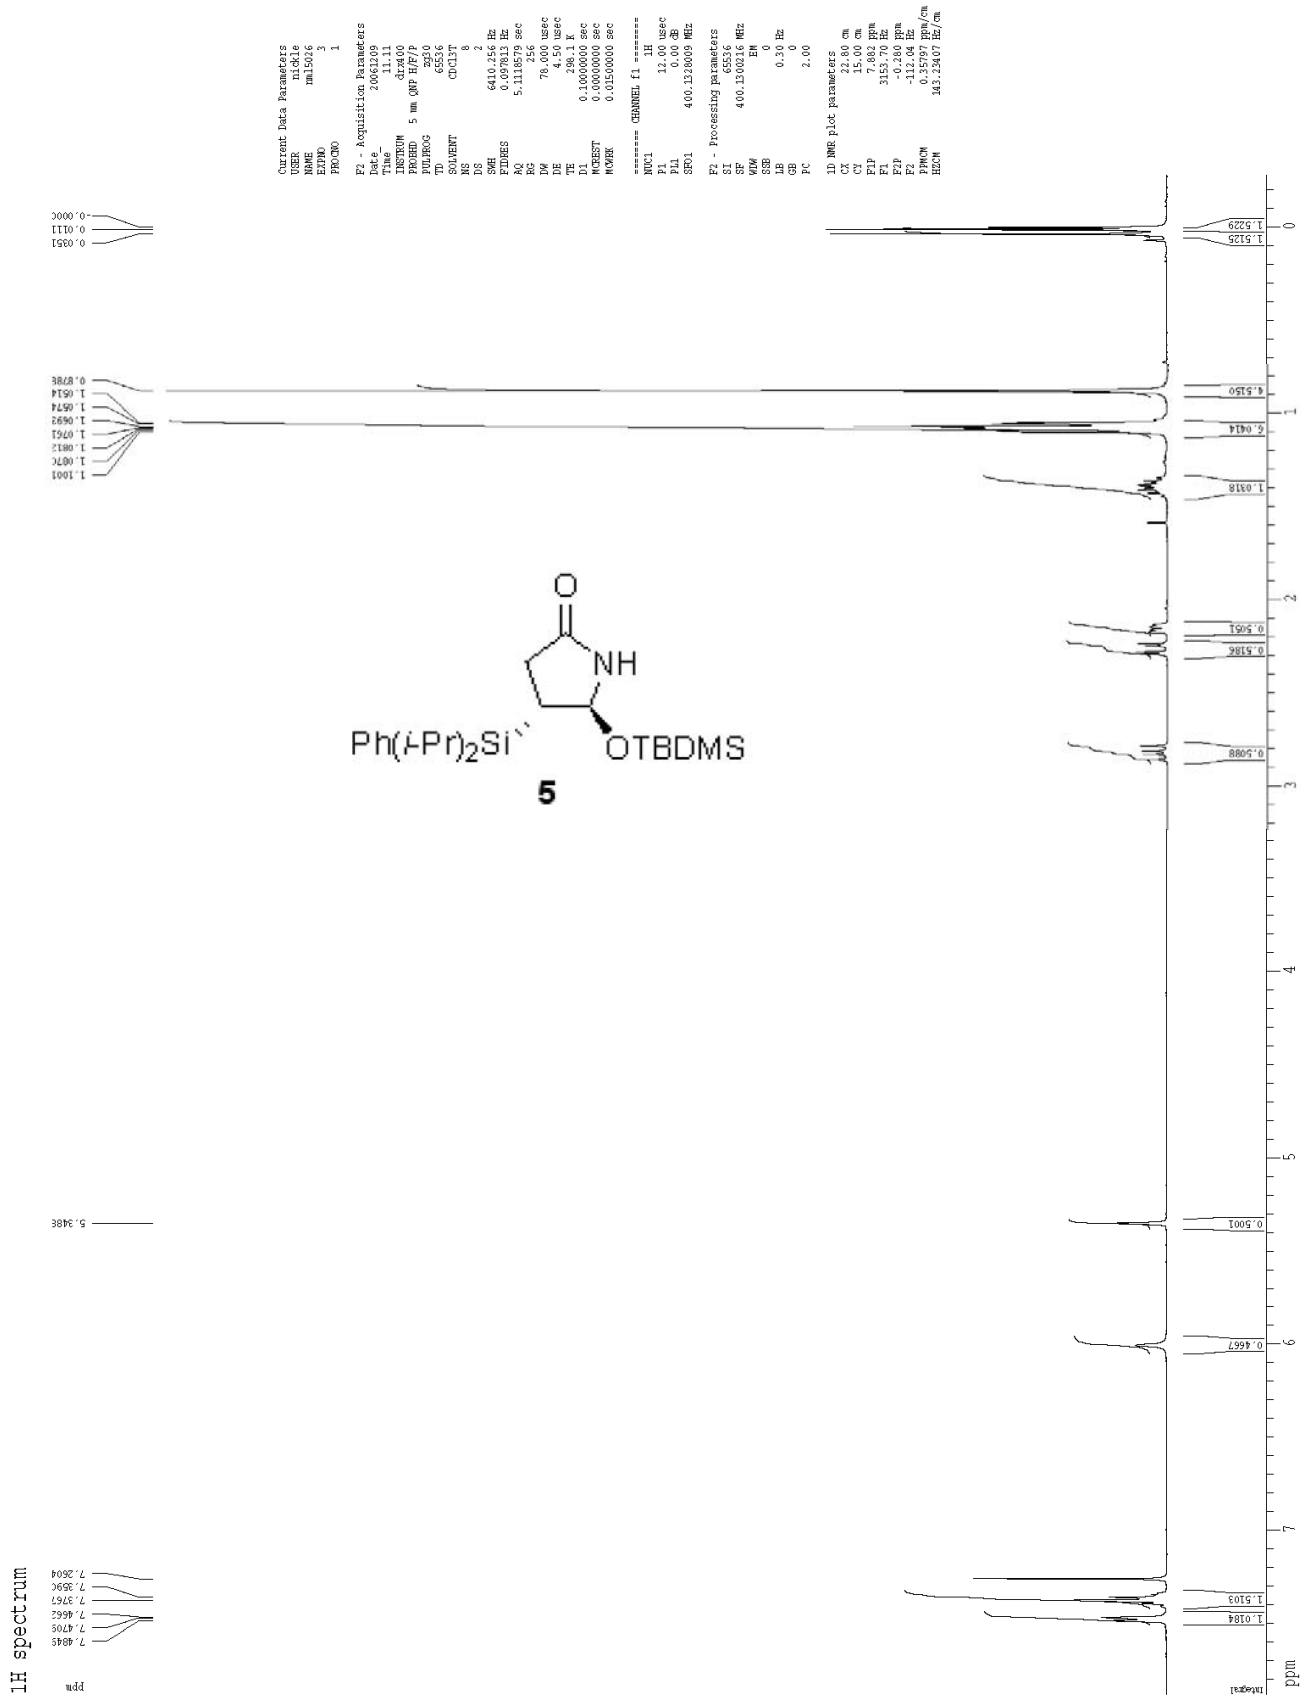



<sup>13</sup>C spectrum with <sup>1</sup>H decoupling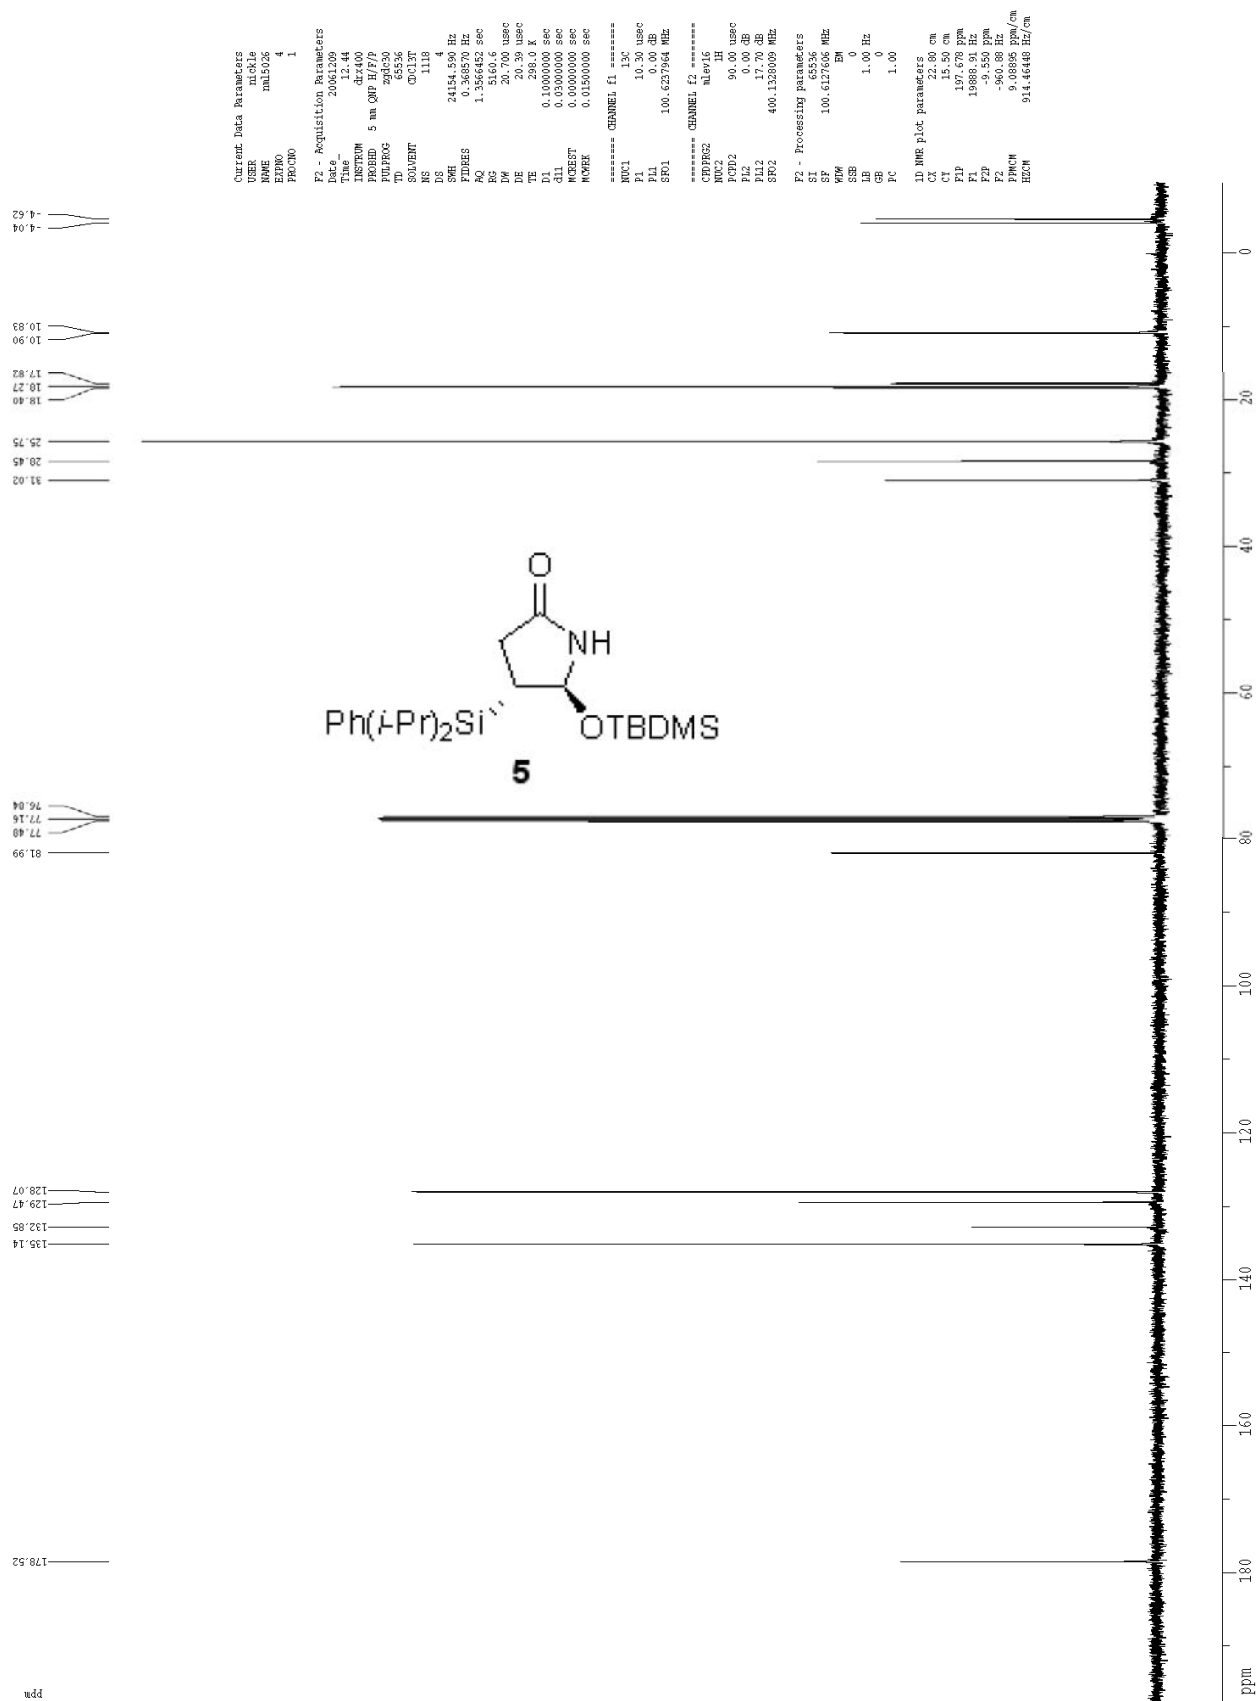

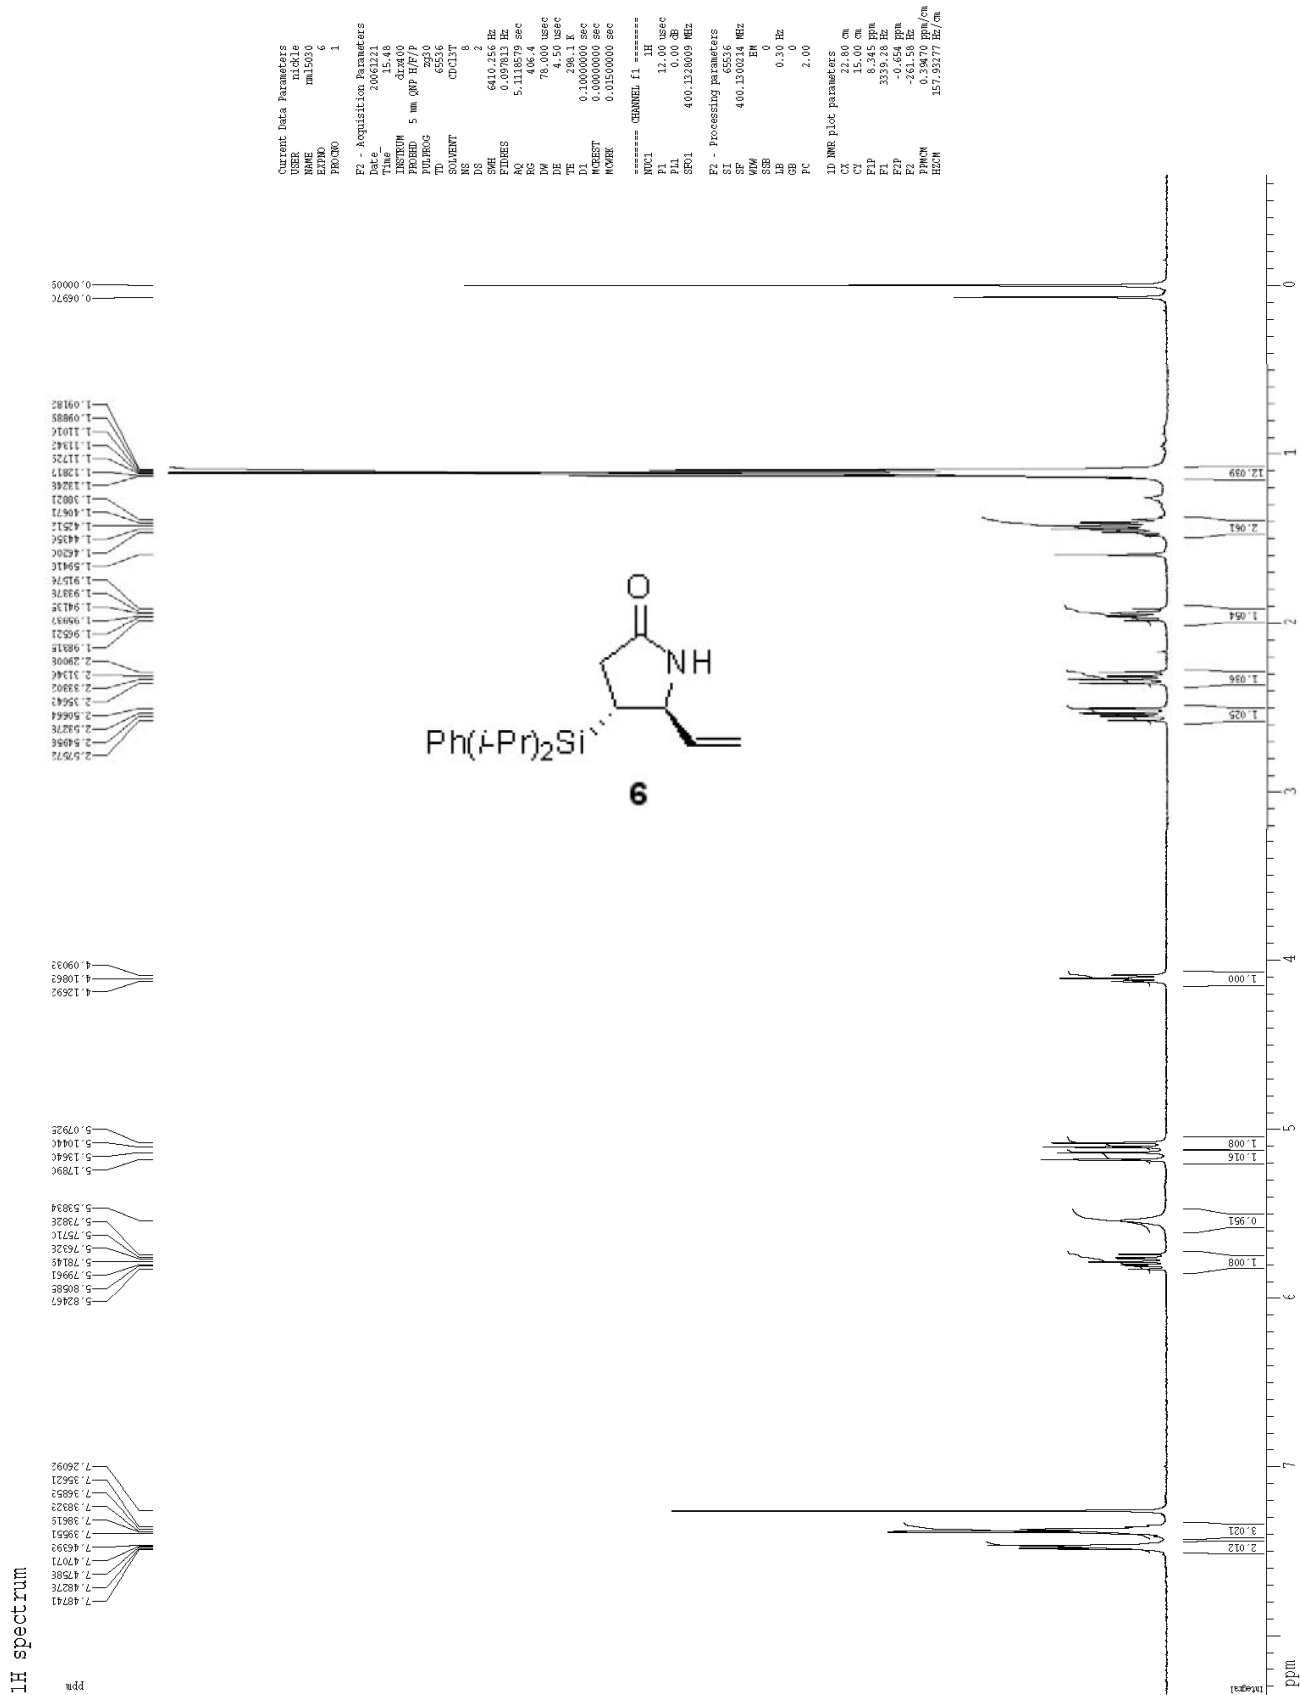

<sup>13</sup>C spectrum with <sup>1</sup>H decoupling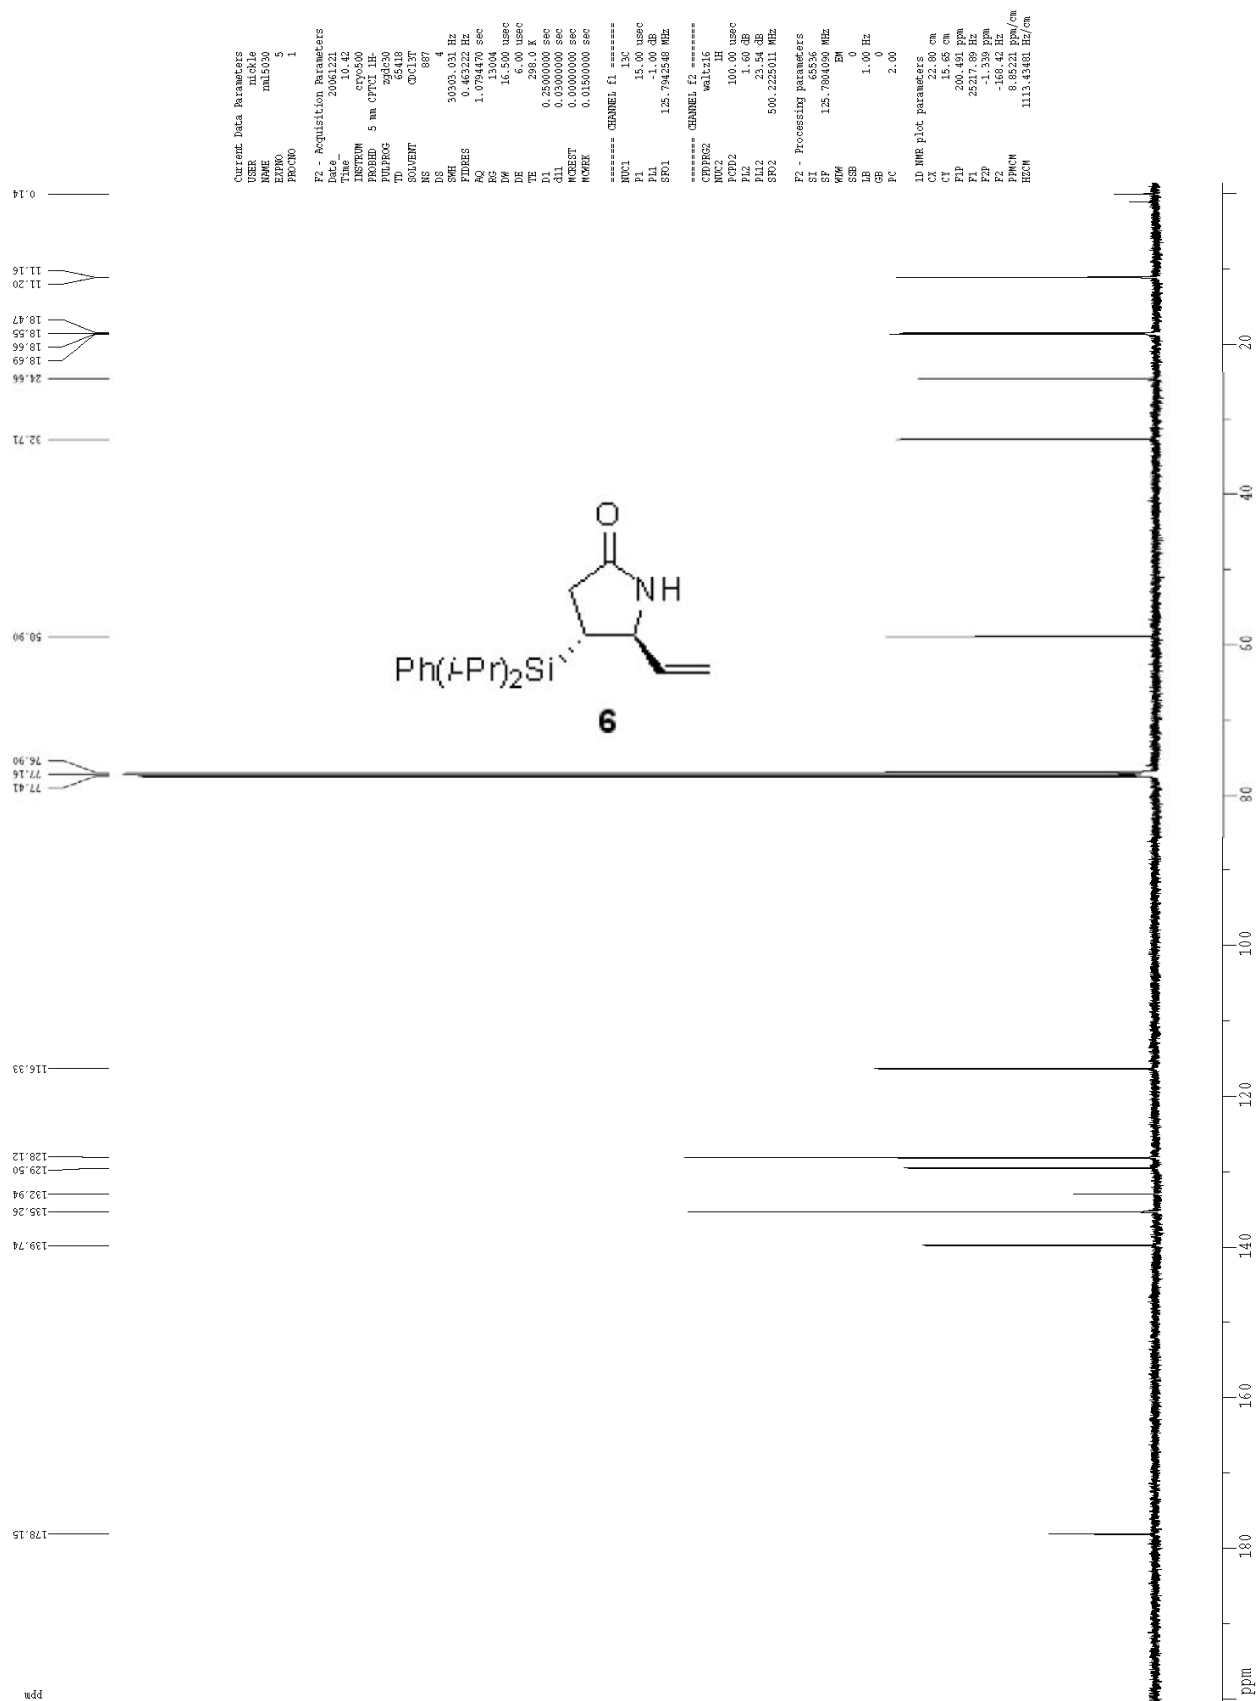

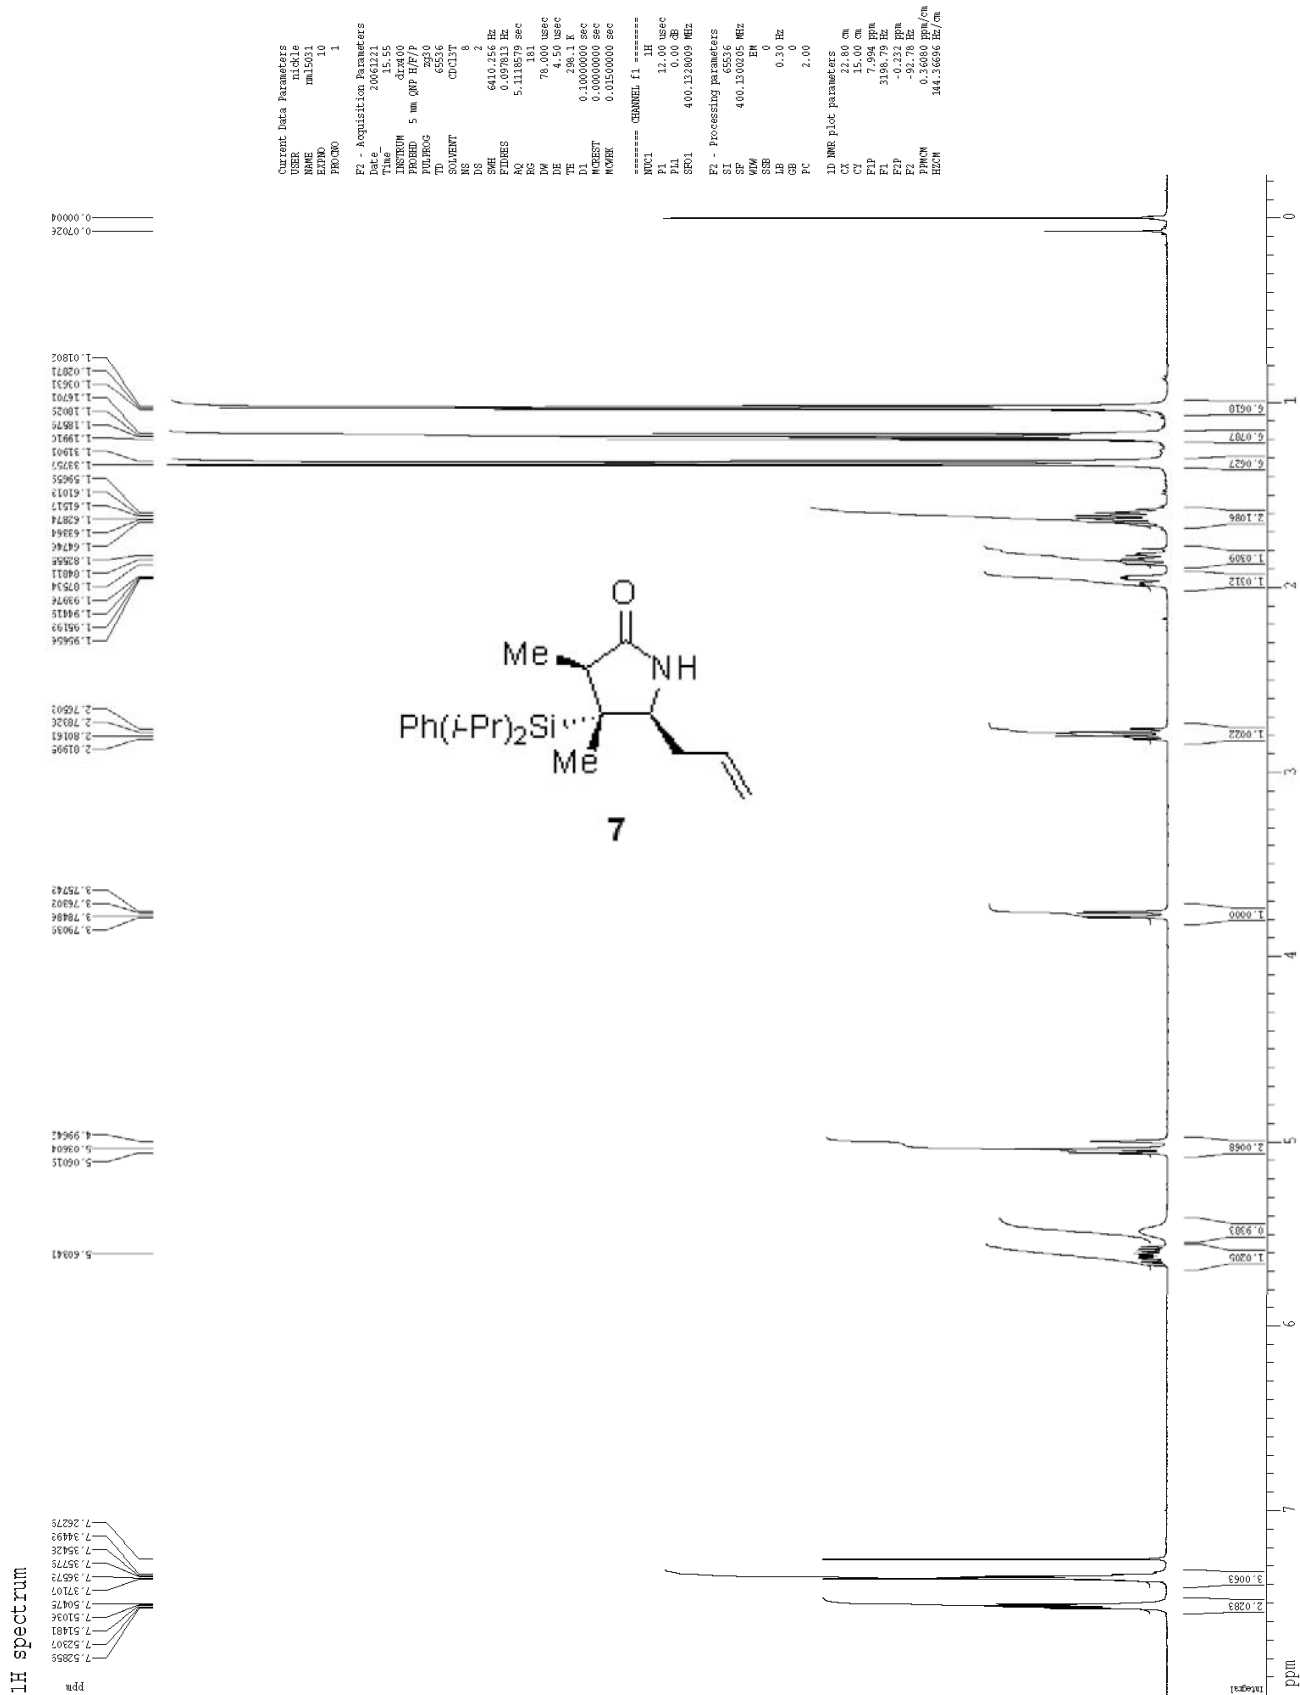

<sup>13</sup>C spectrum with <sup>1</sup>H decoupling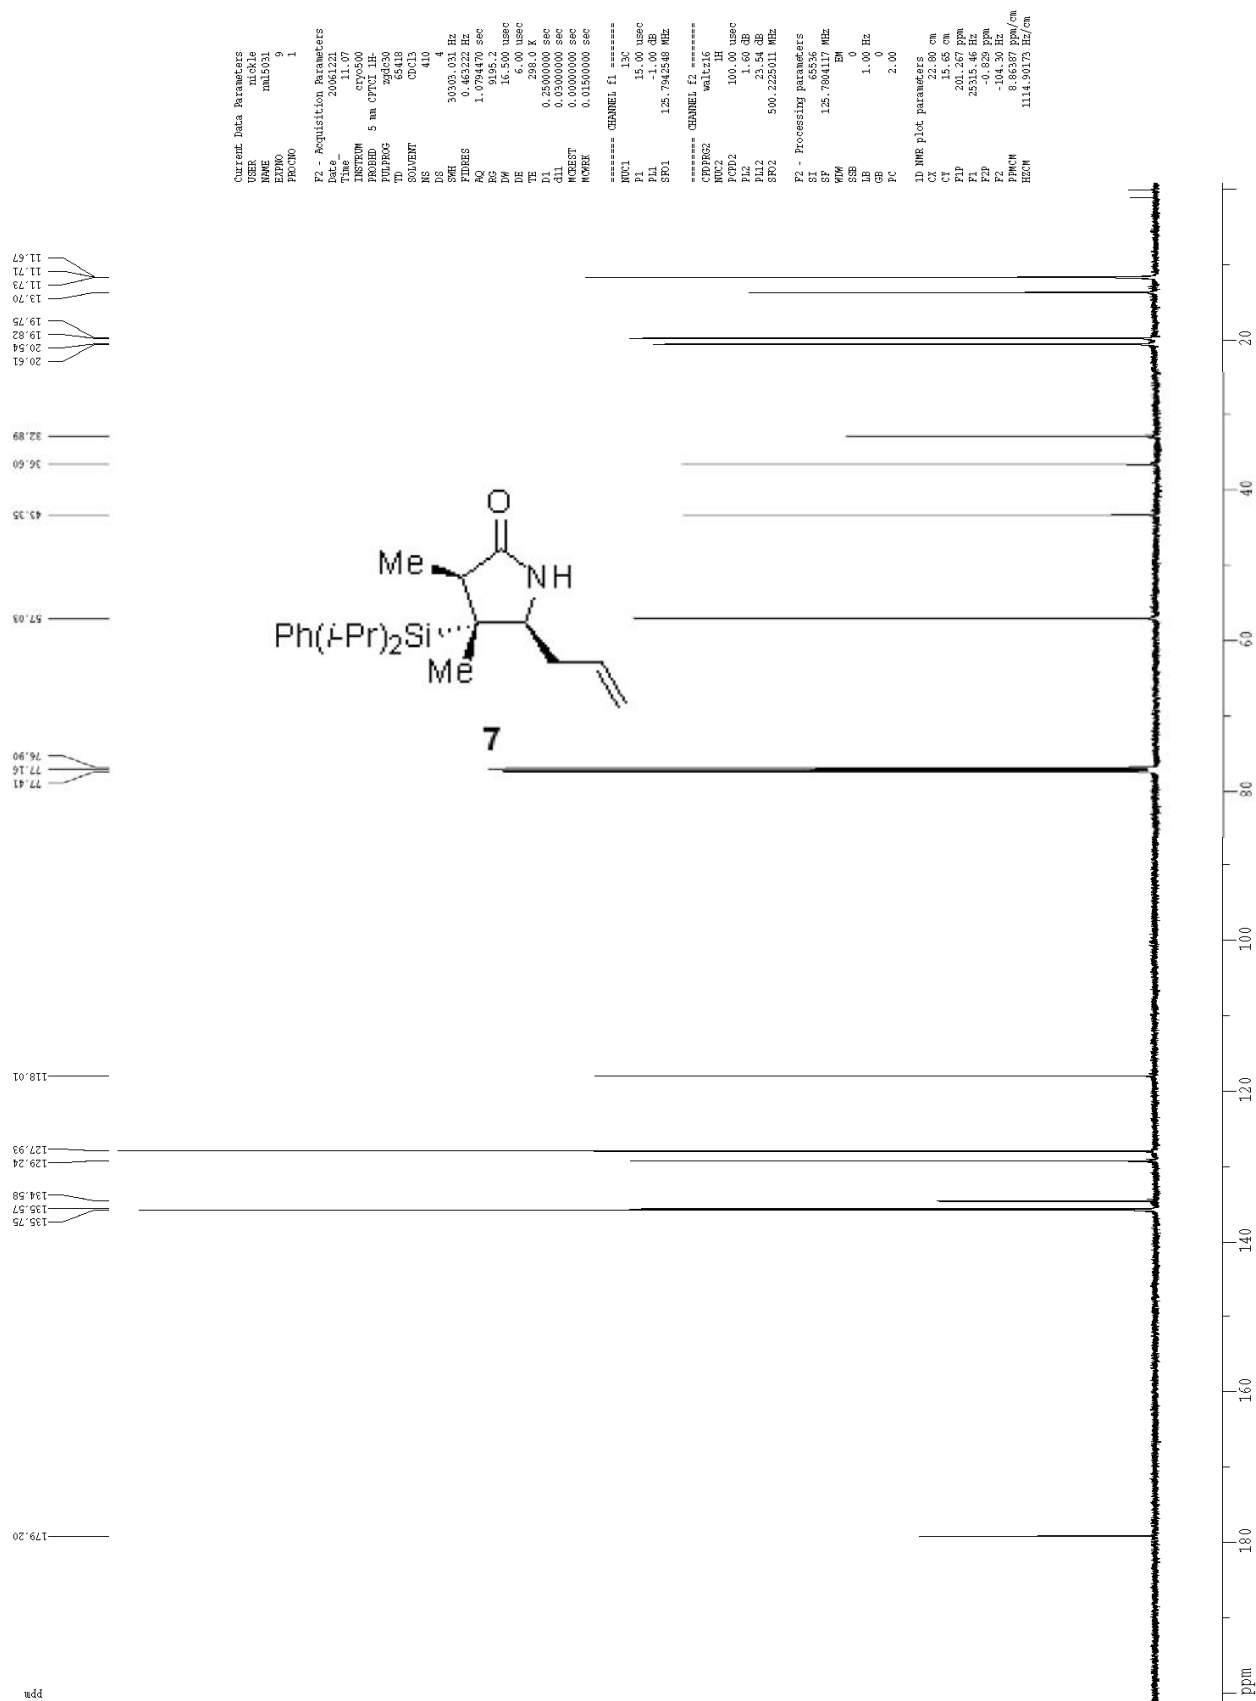

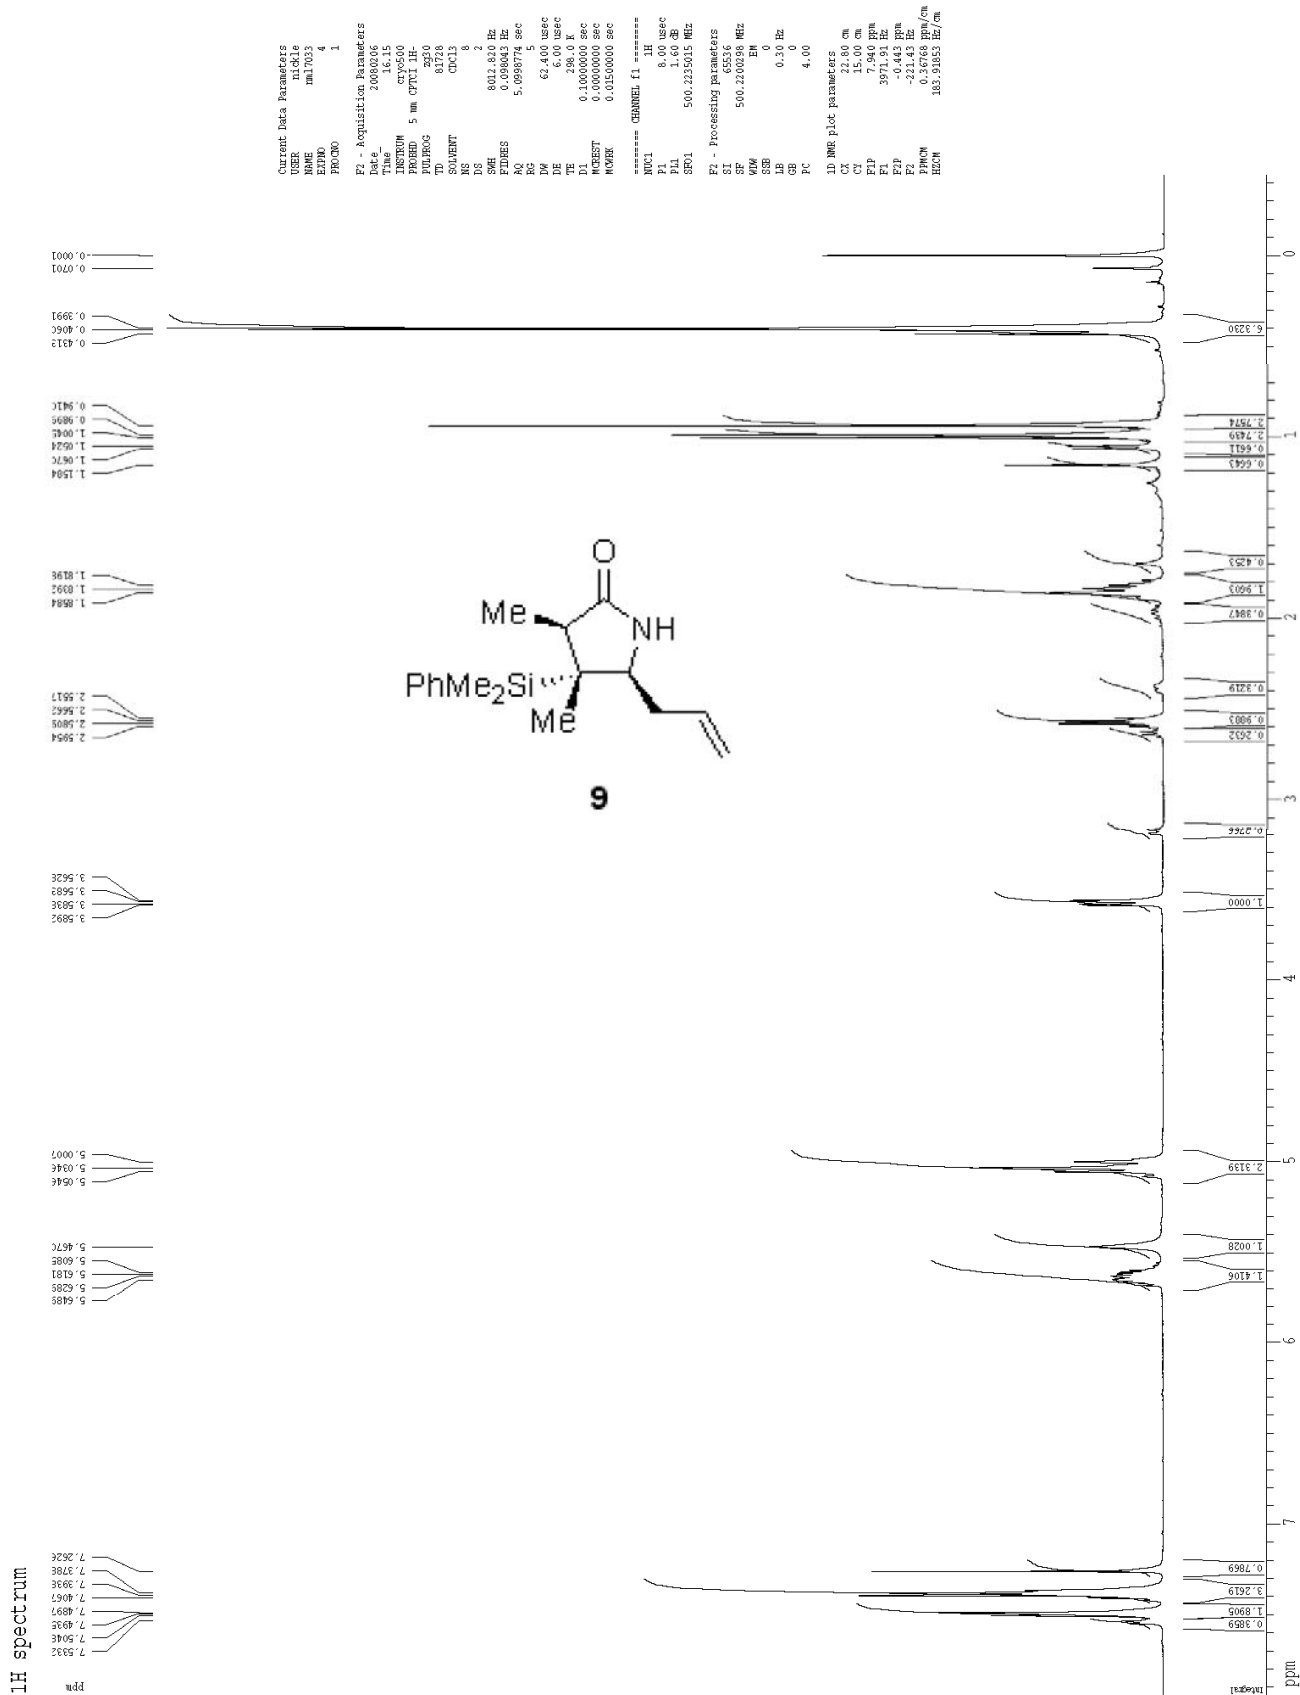

<sup>13</sup>C spectrum with <sup>1</sup>H decoupling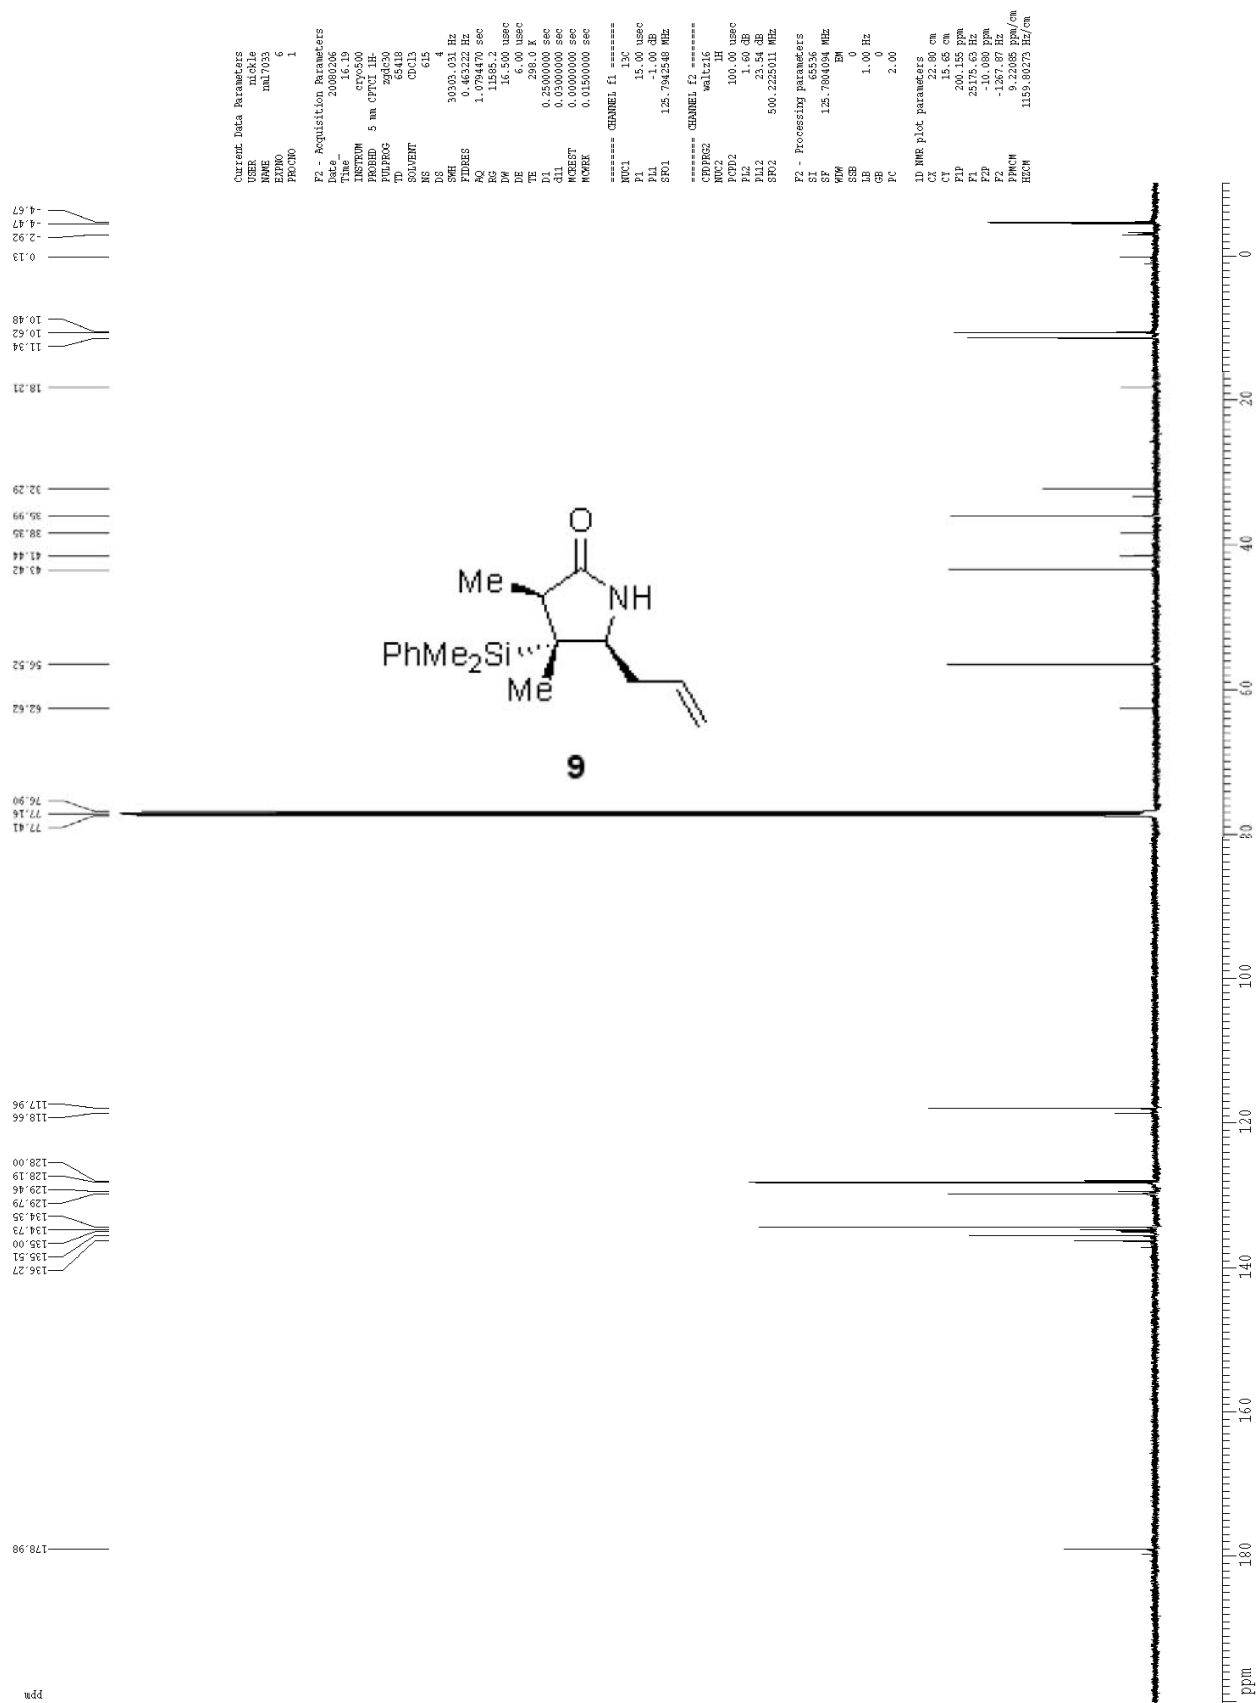

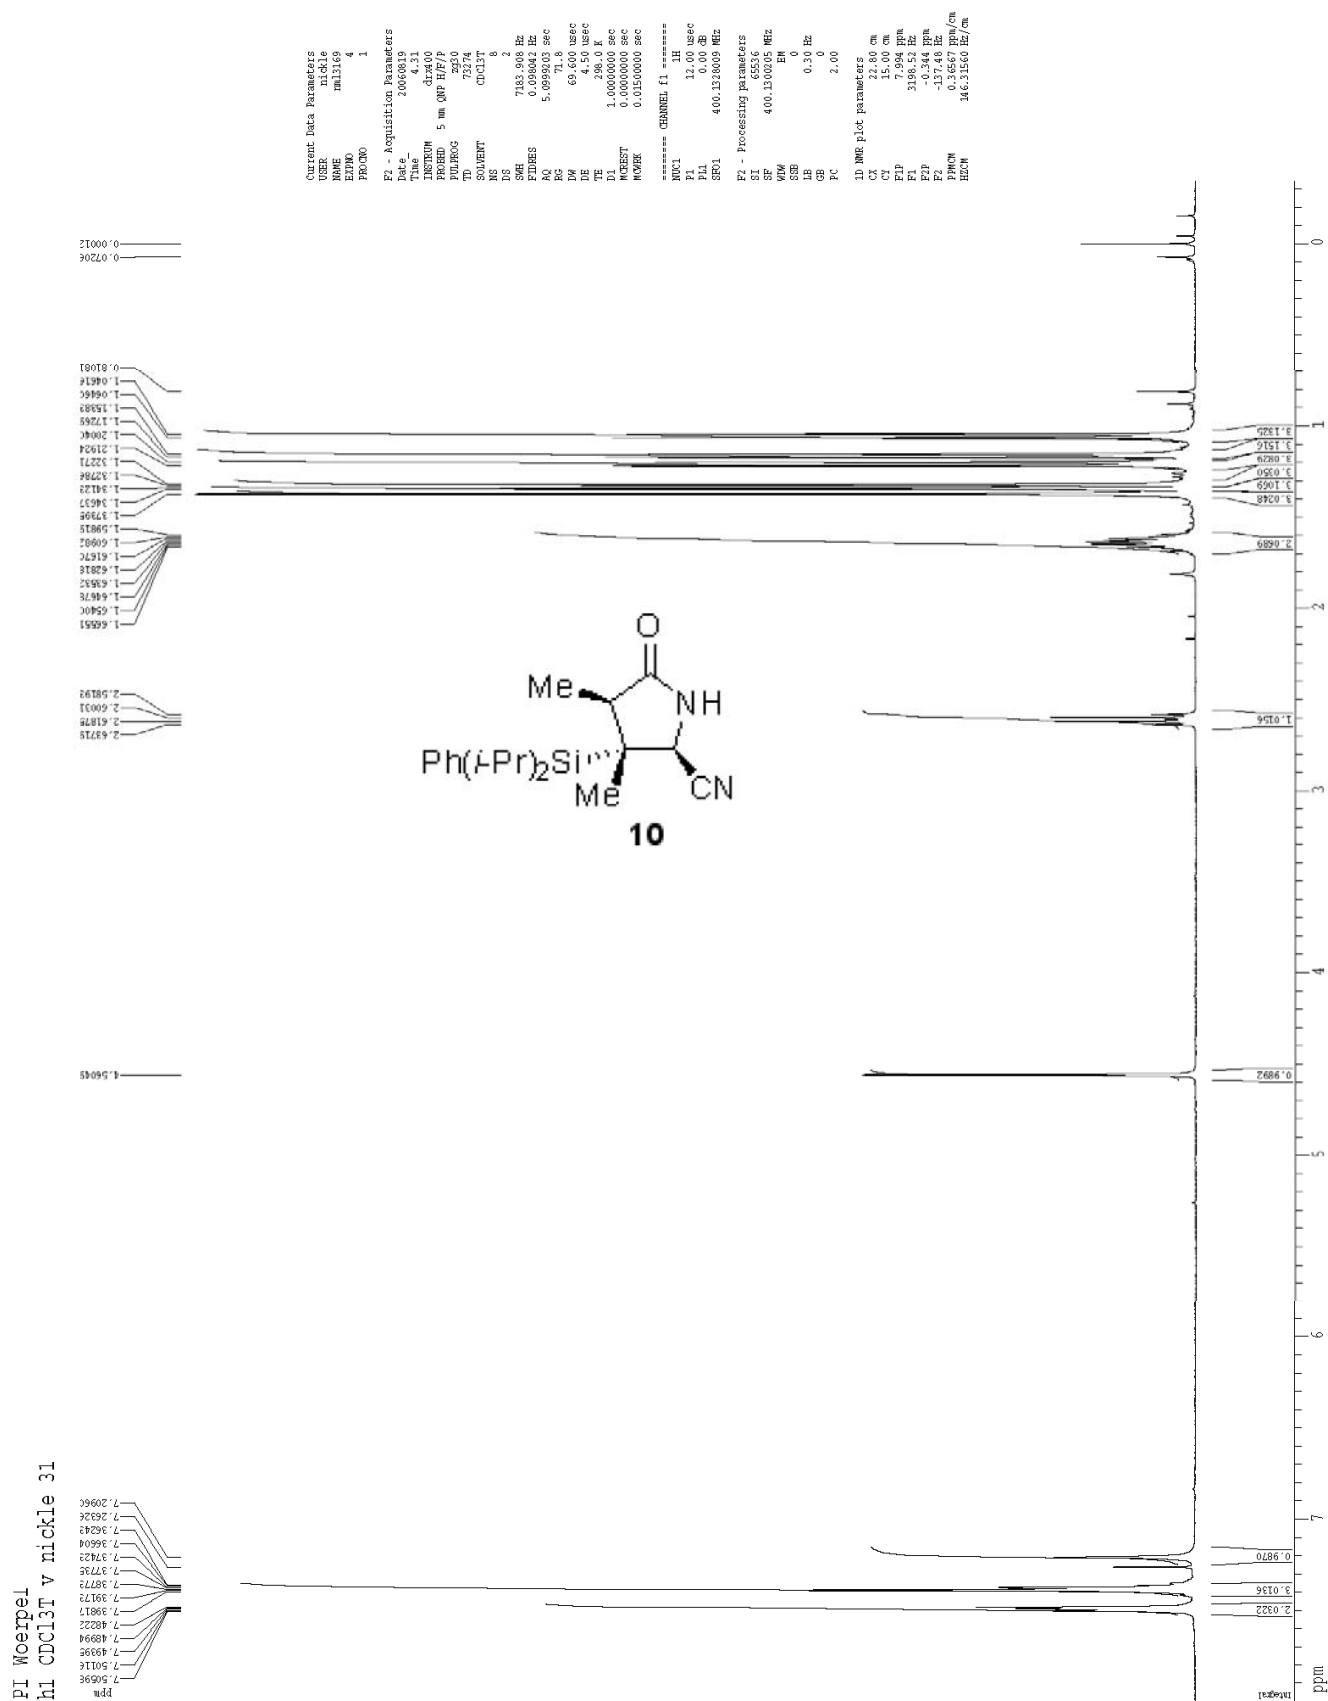



PI Woerpel  
cd3 cdcl3t v nickle 31

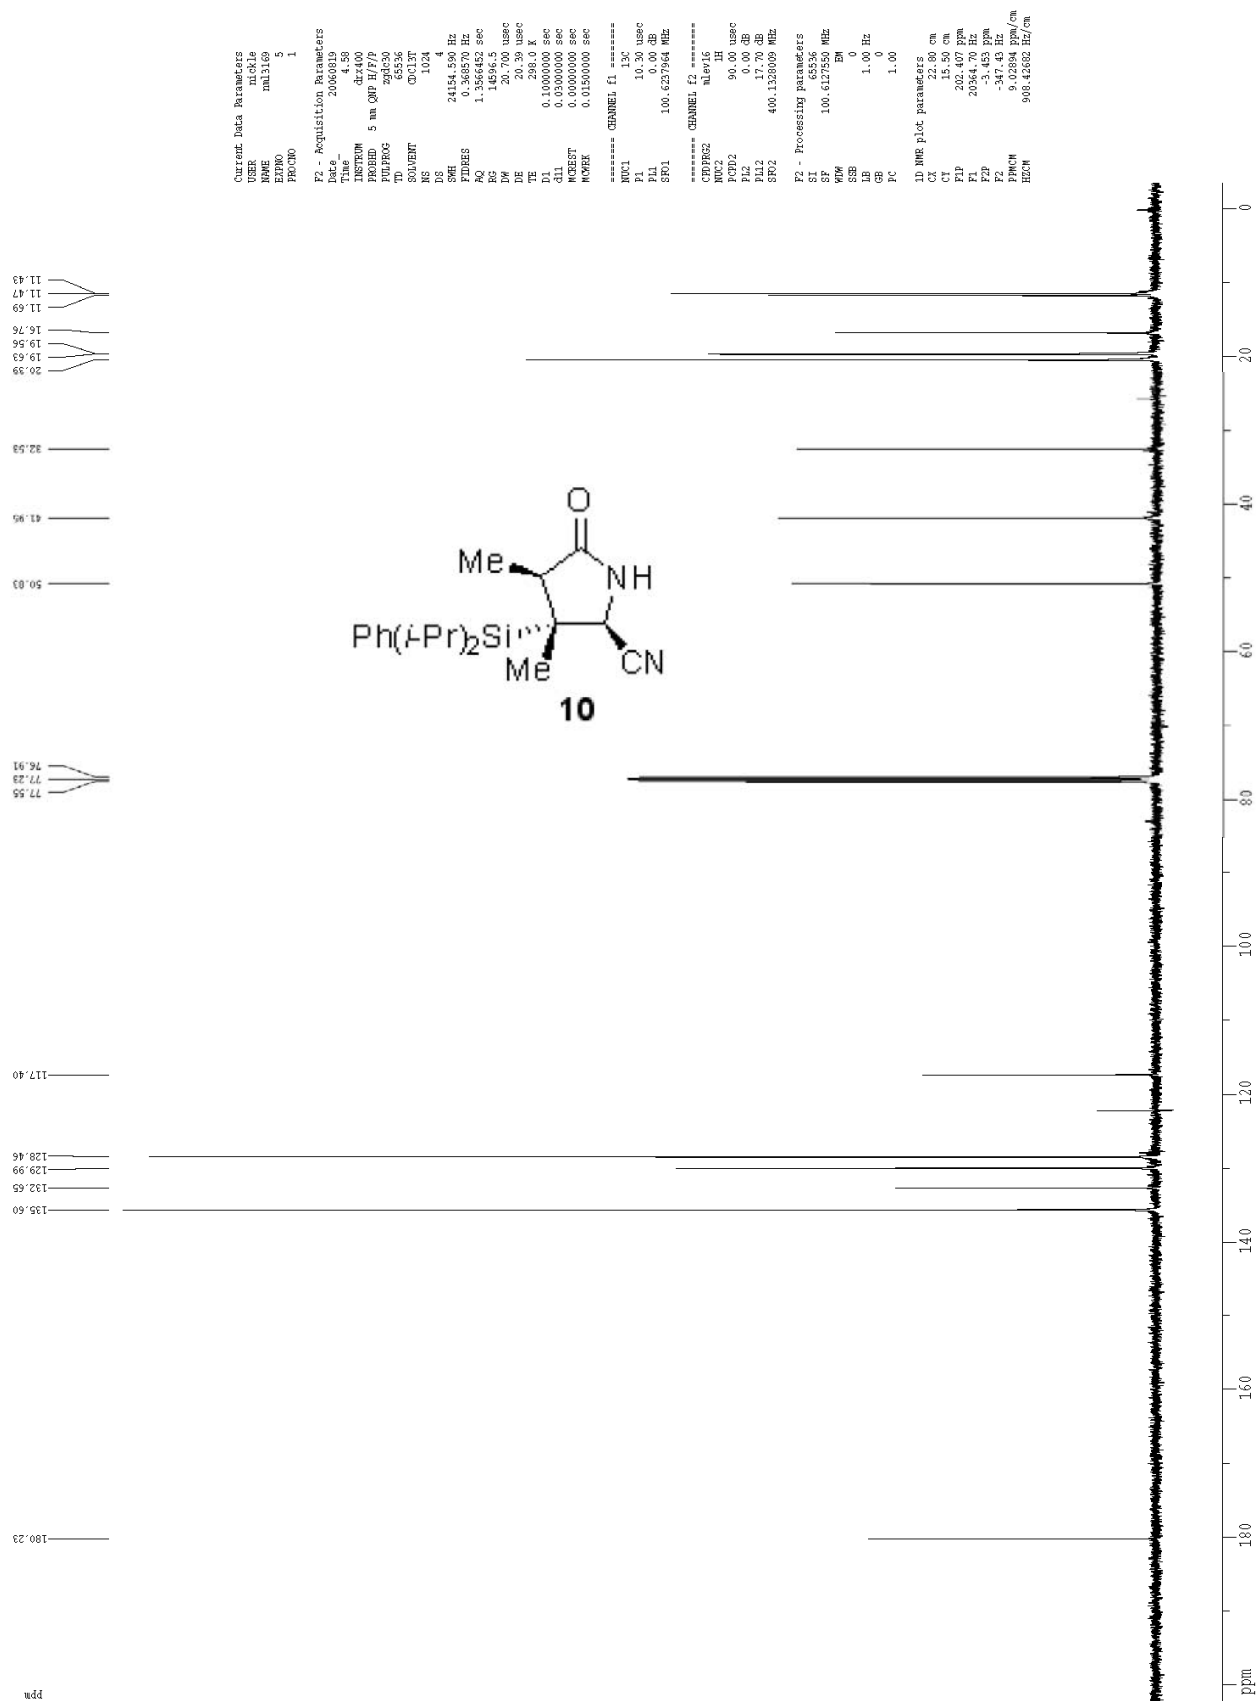

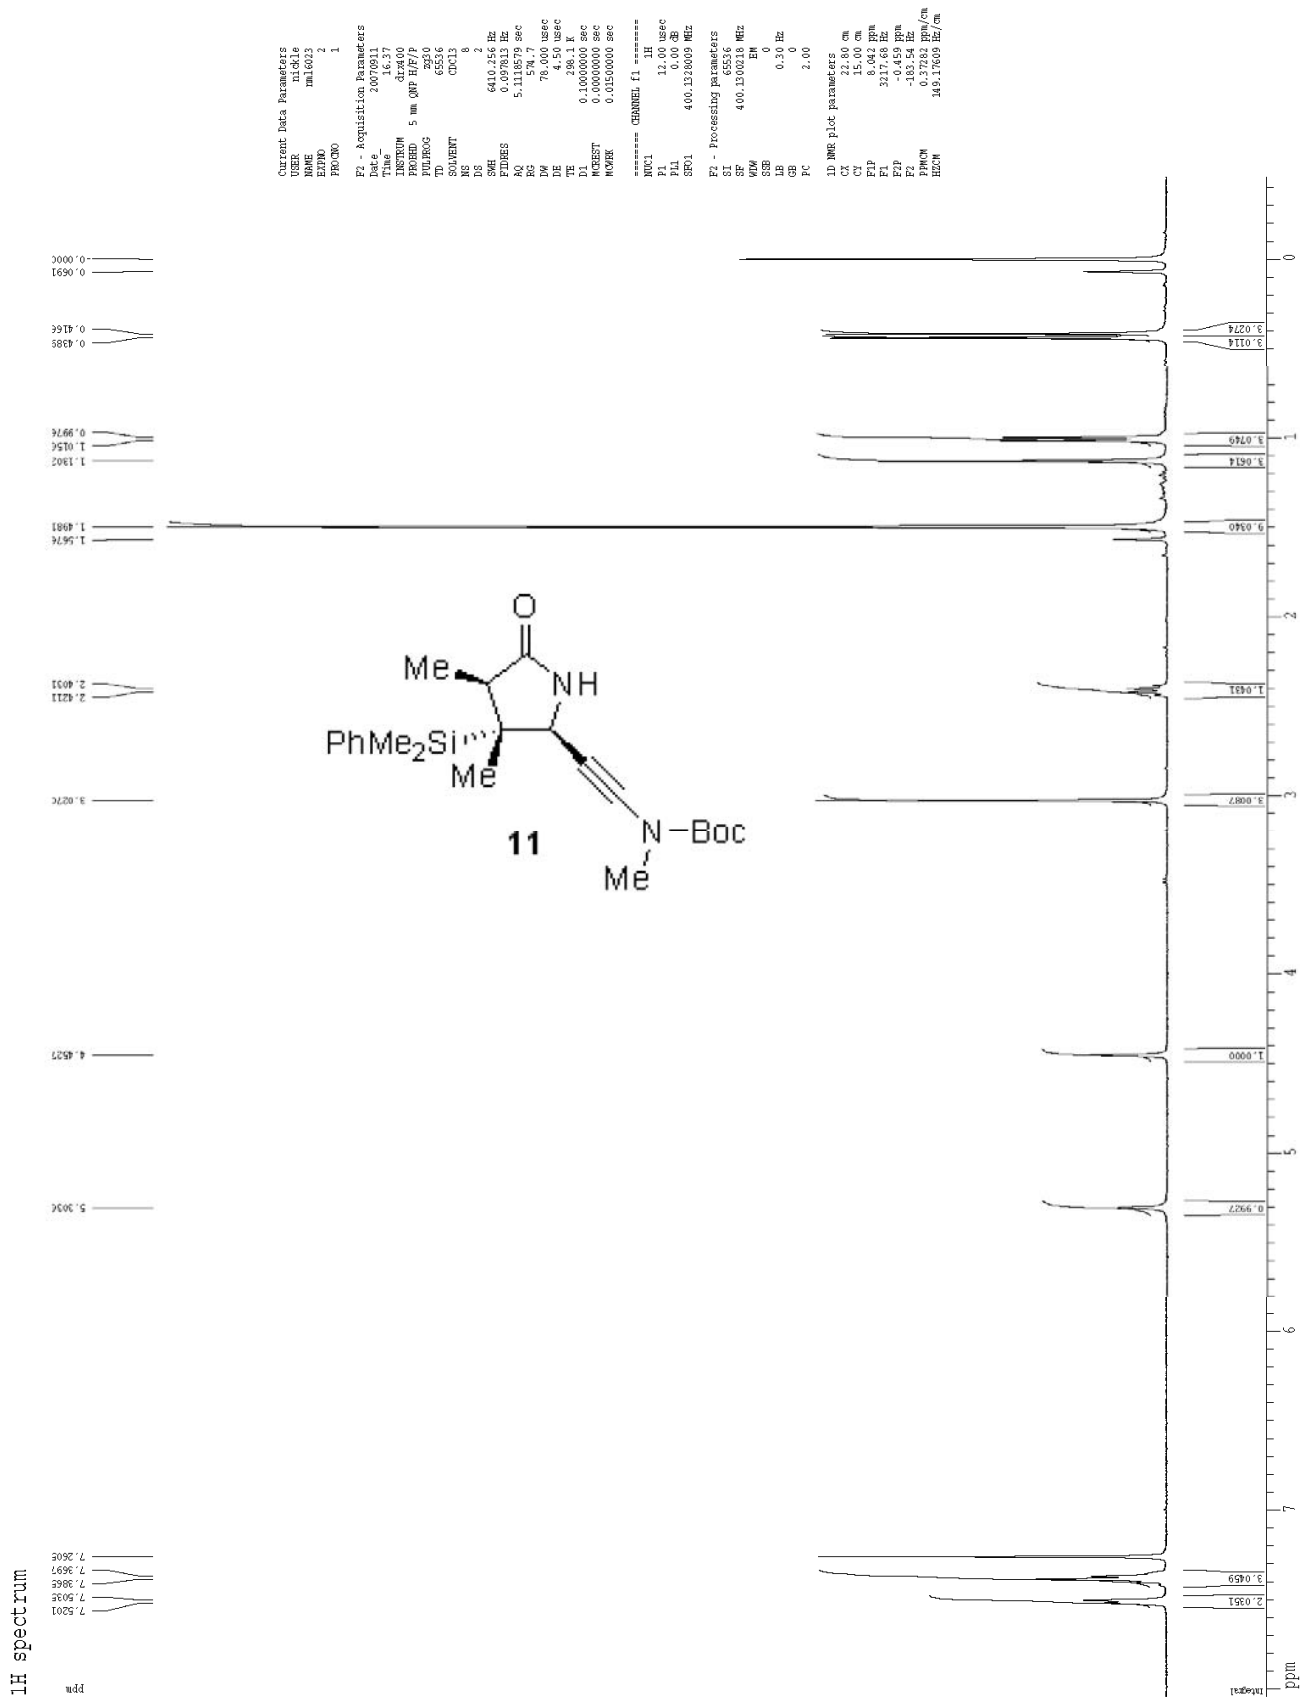

<sup>13</sup>C spectrum with <sup>1</sup>H decoupling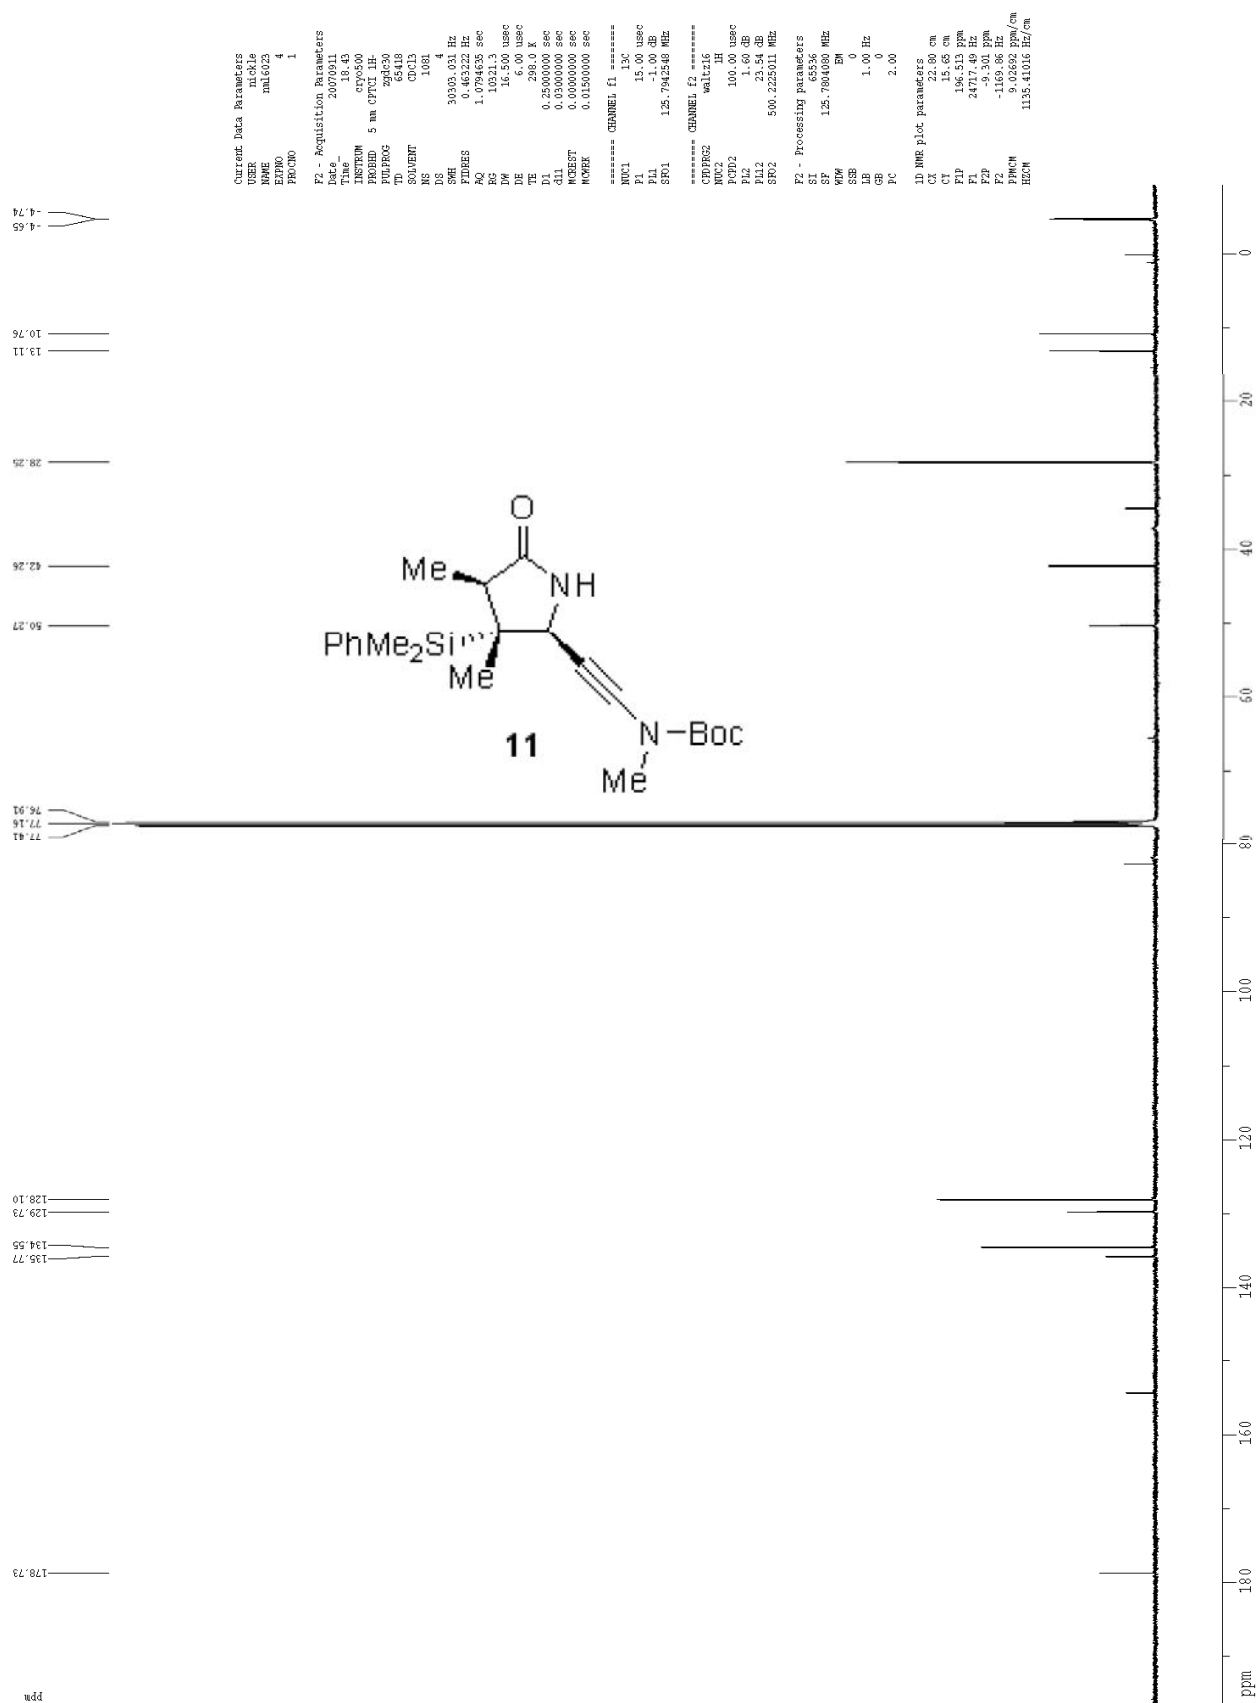

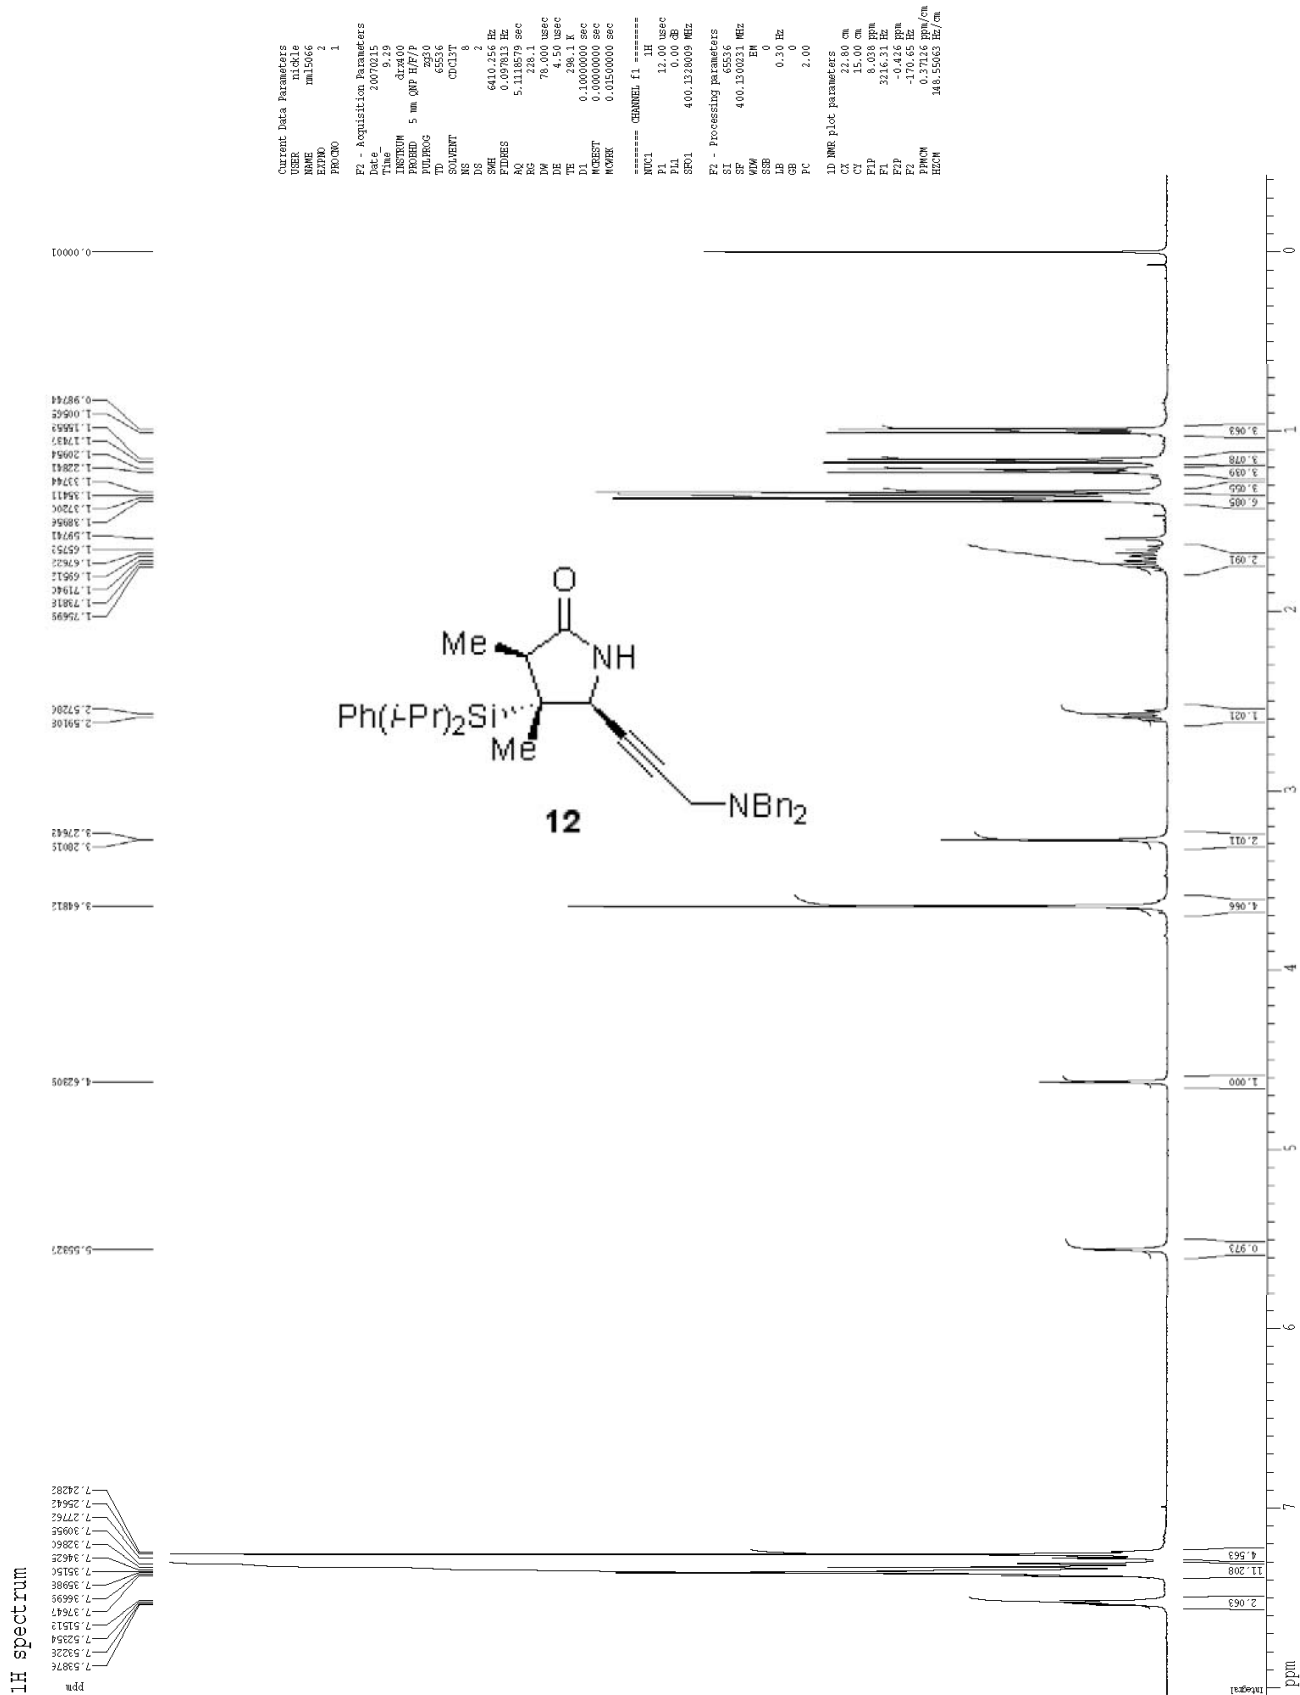

<sup>13</sup>C spectrum with <sup>1</sup>H decoupling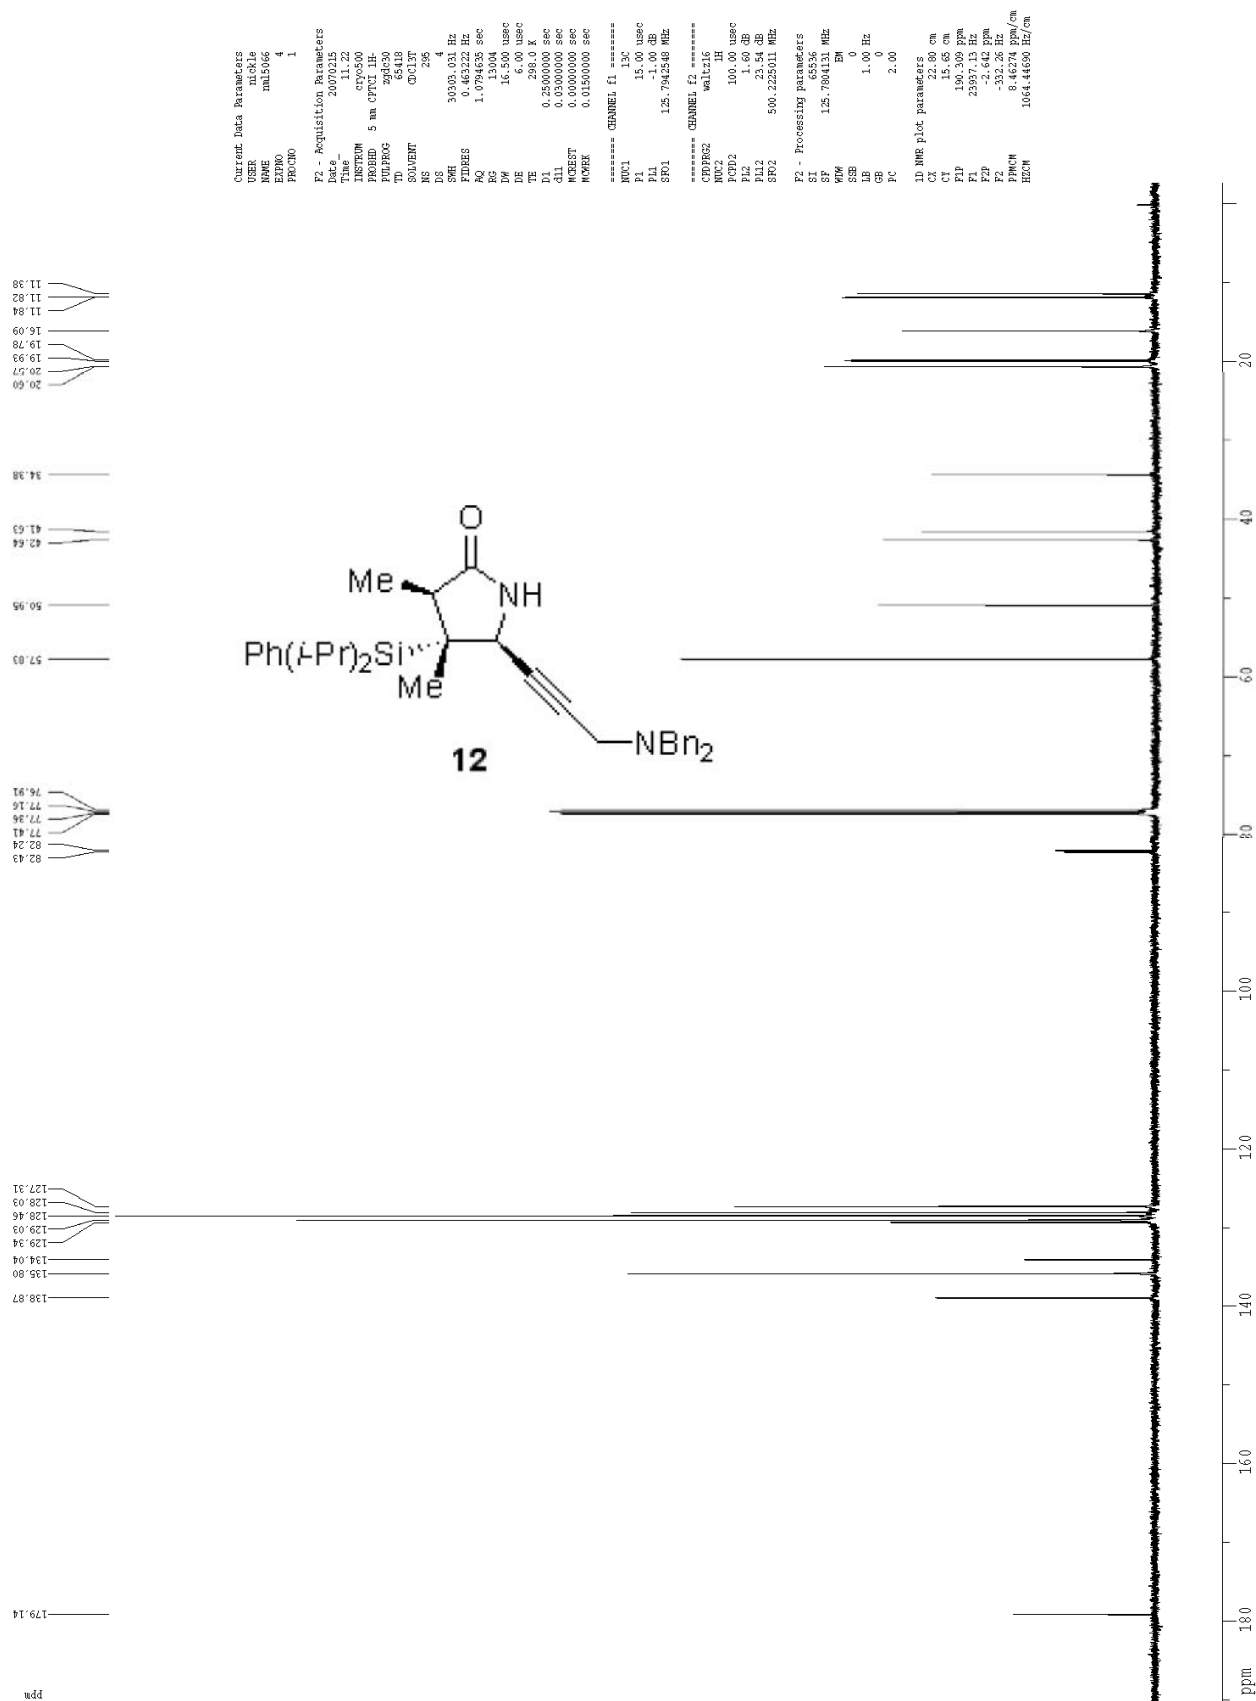

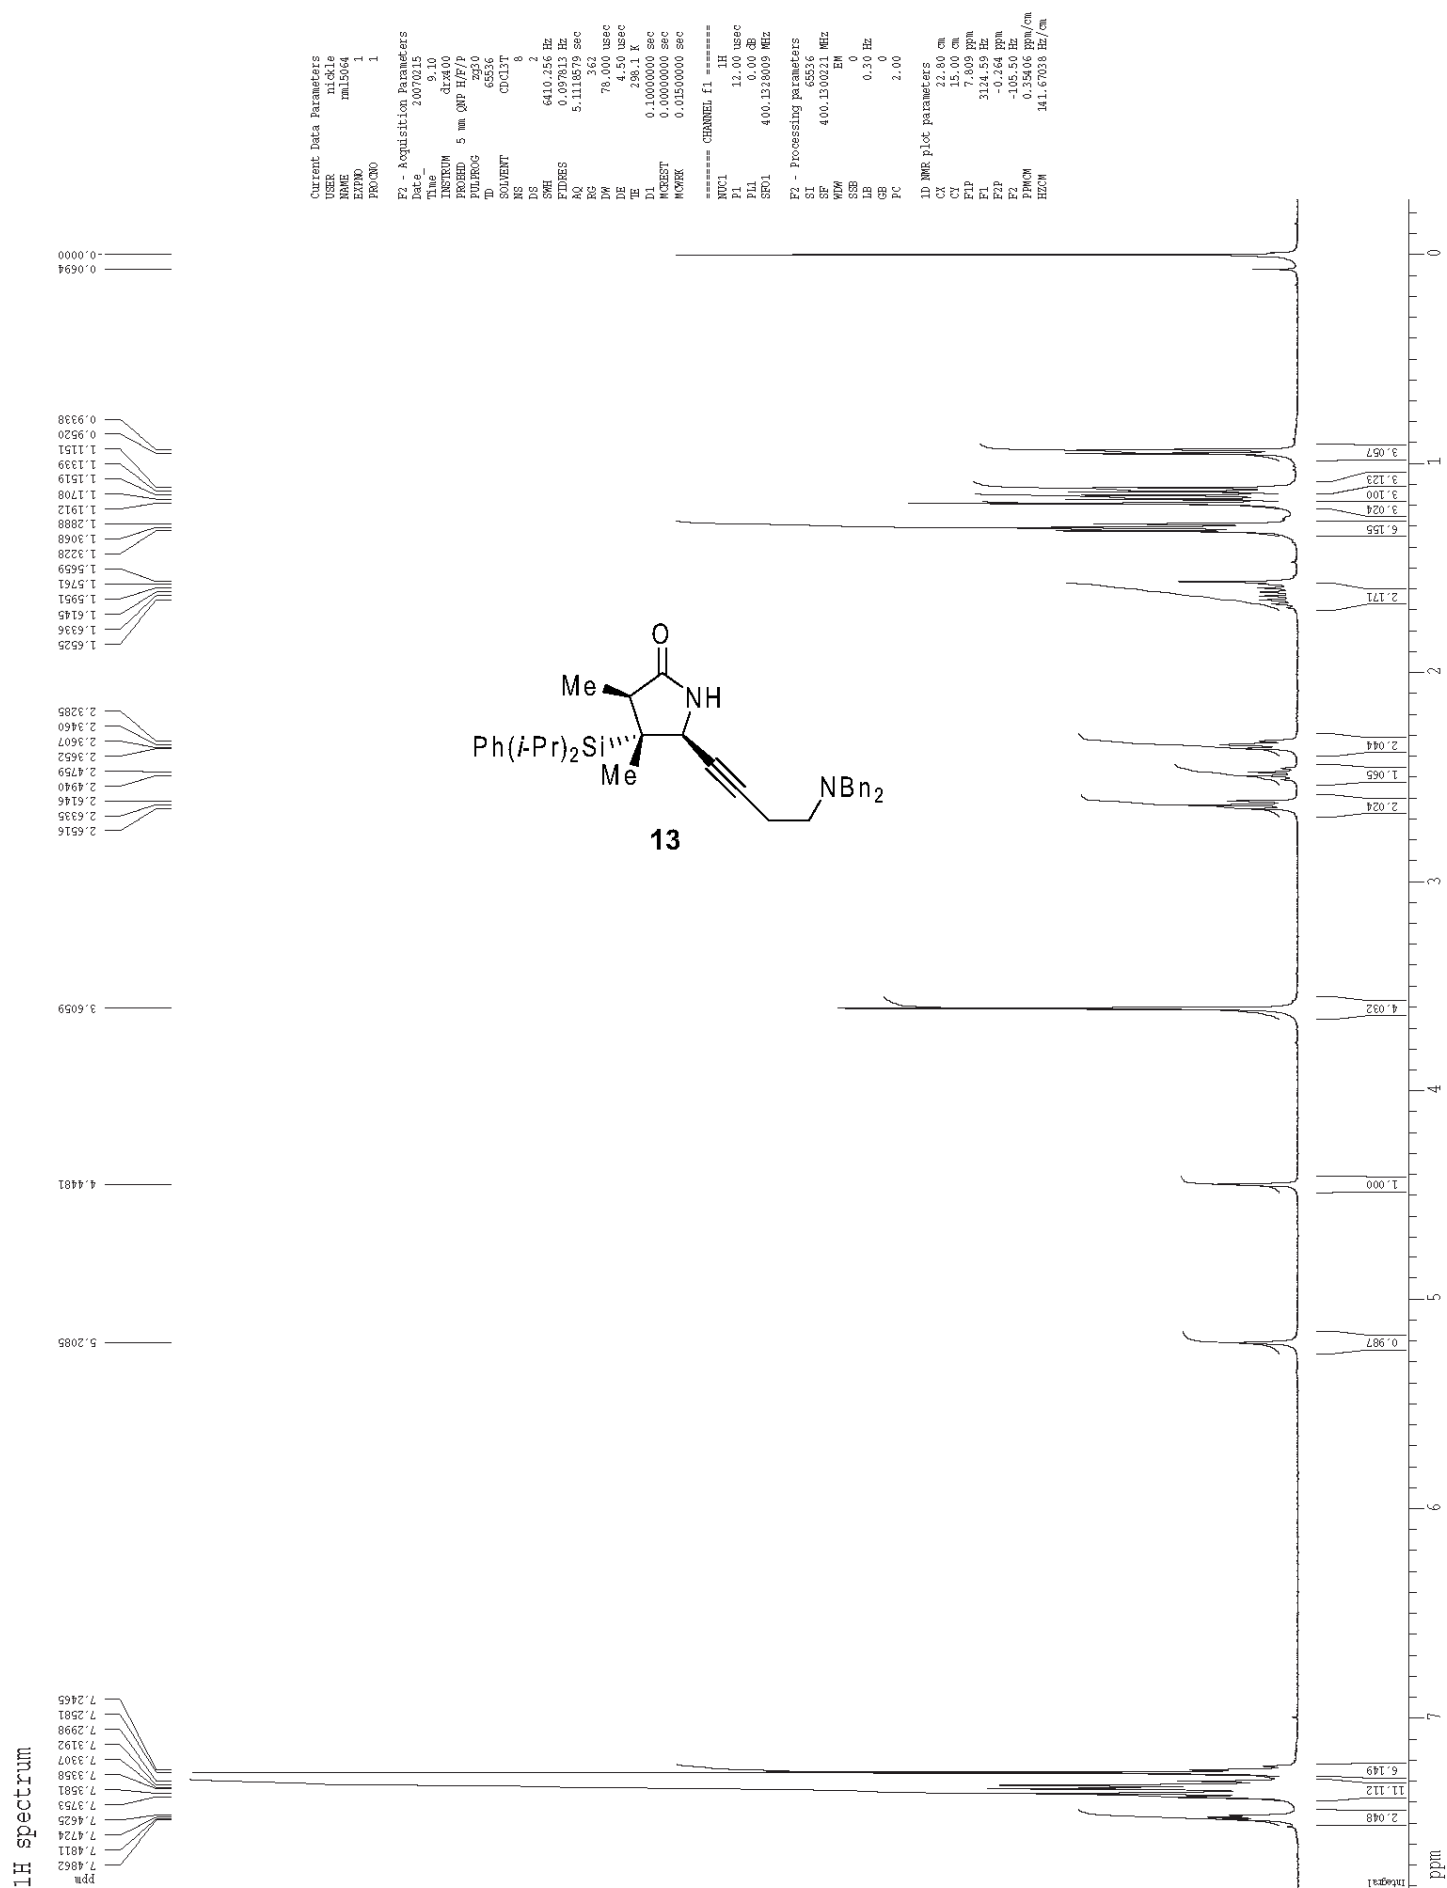

<sup>13</sup>C spectrum with <sup>1</sup>H decoupling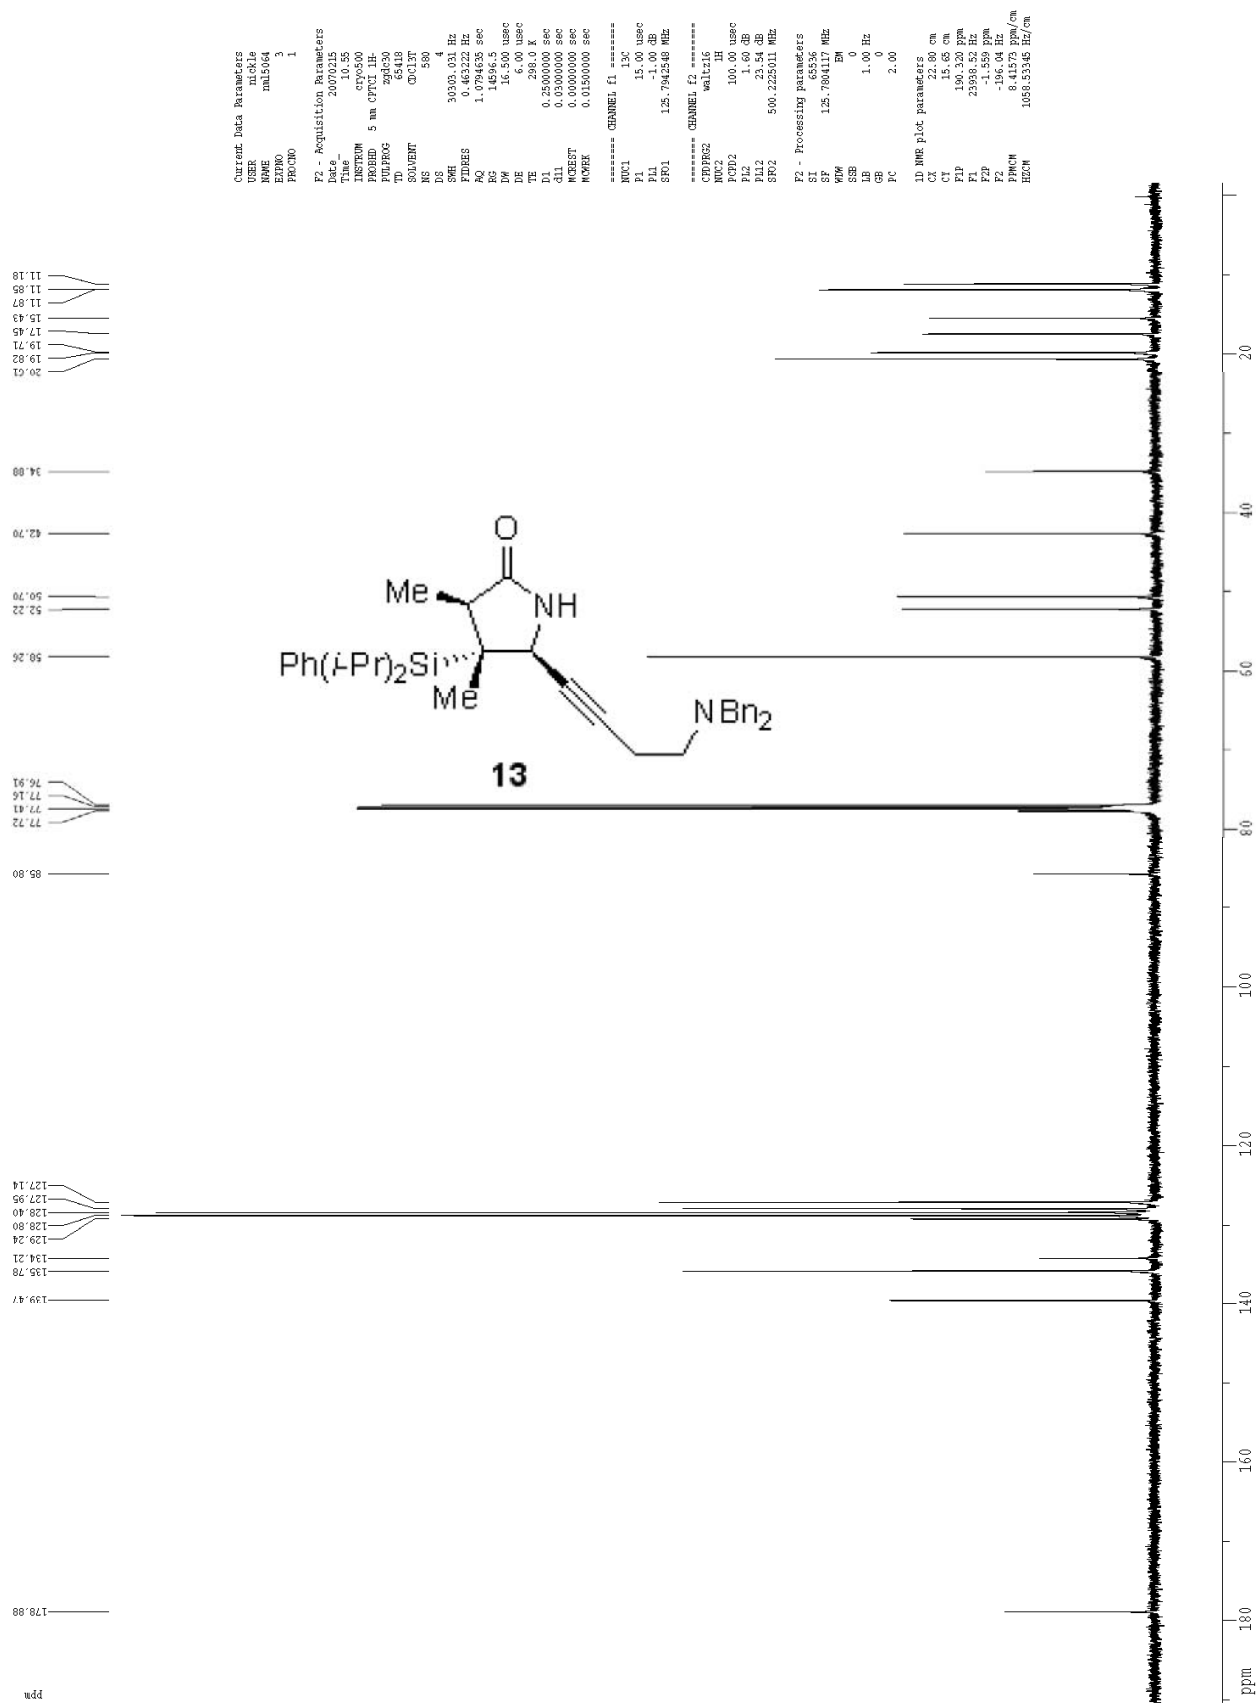

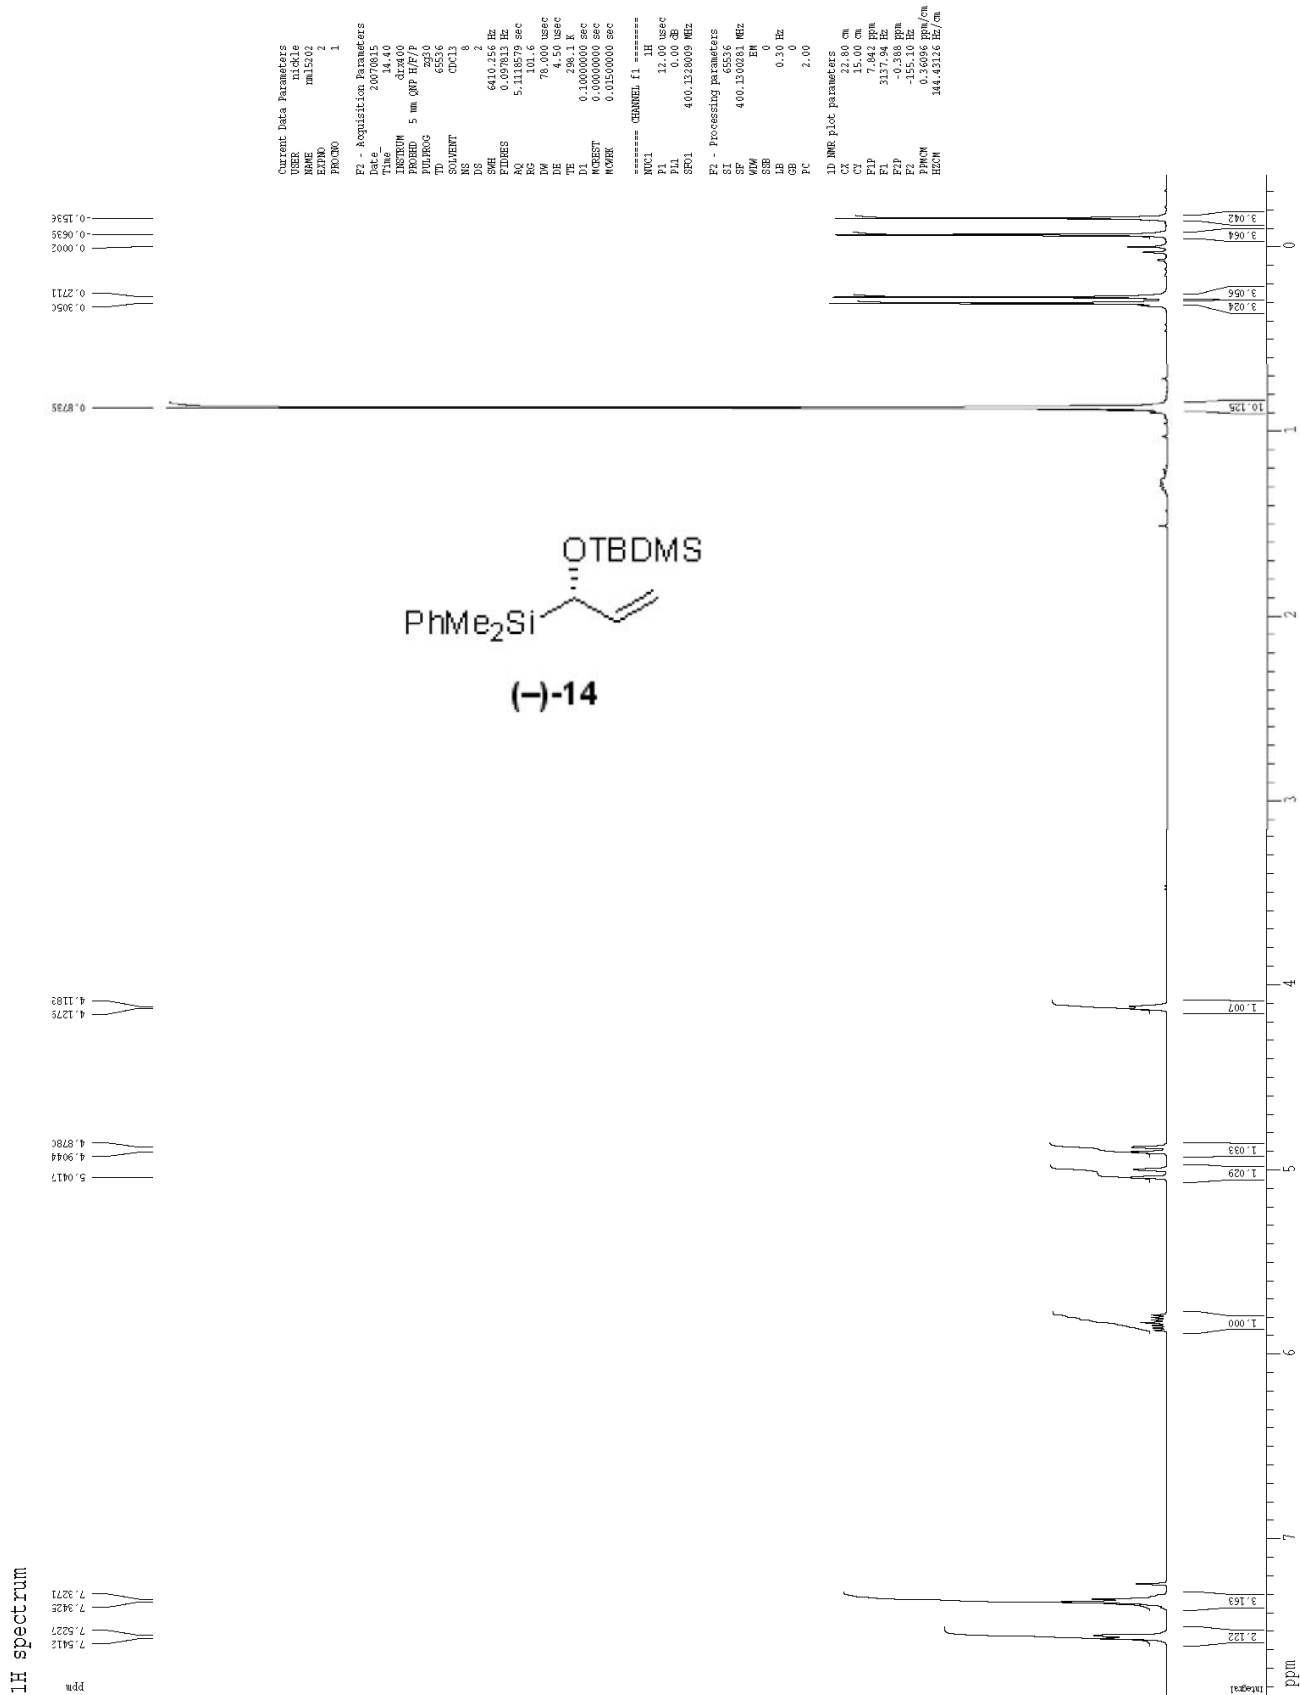





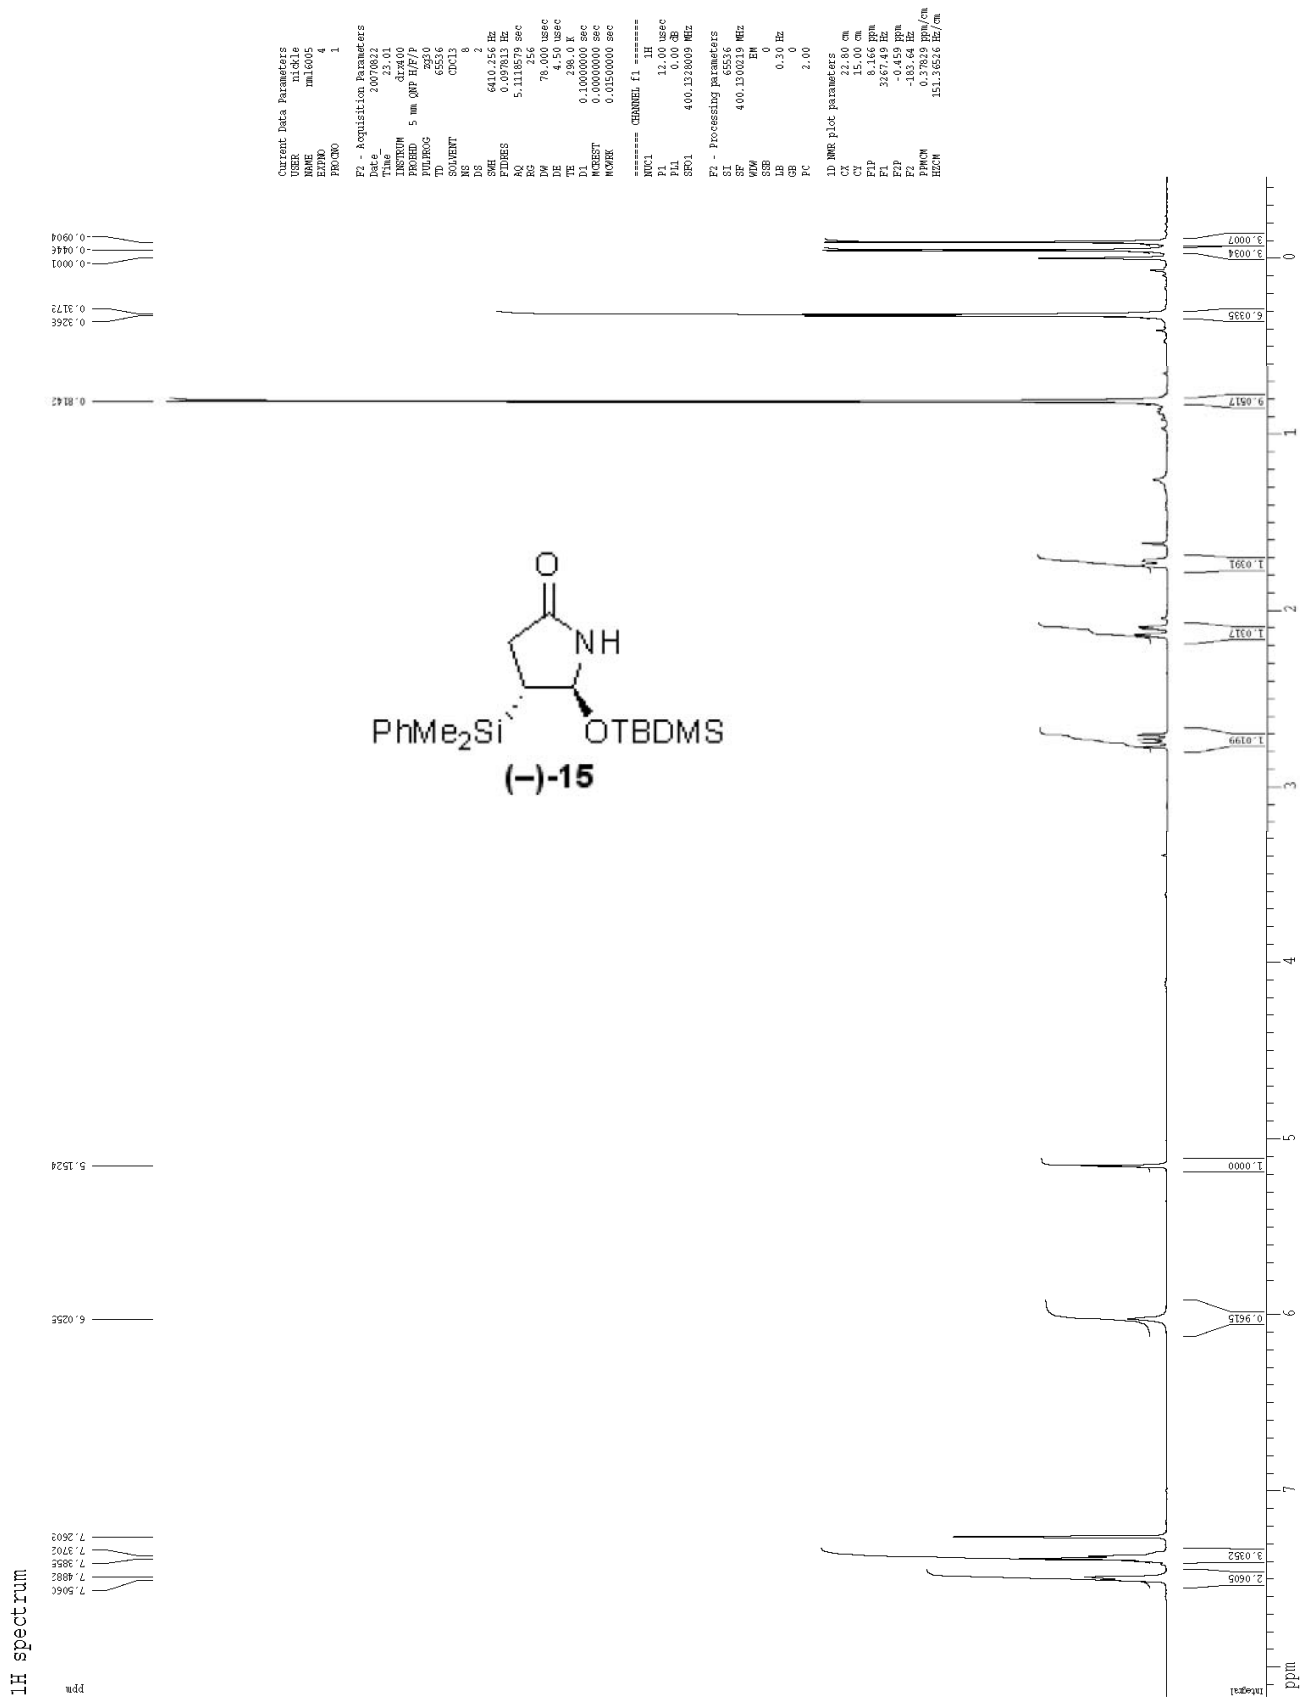



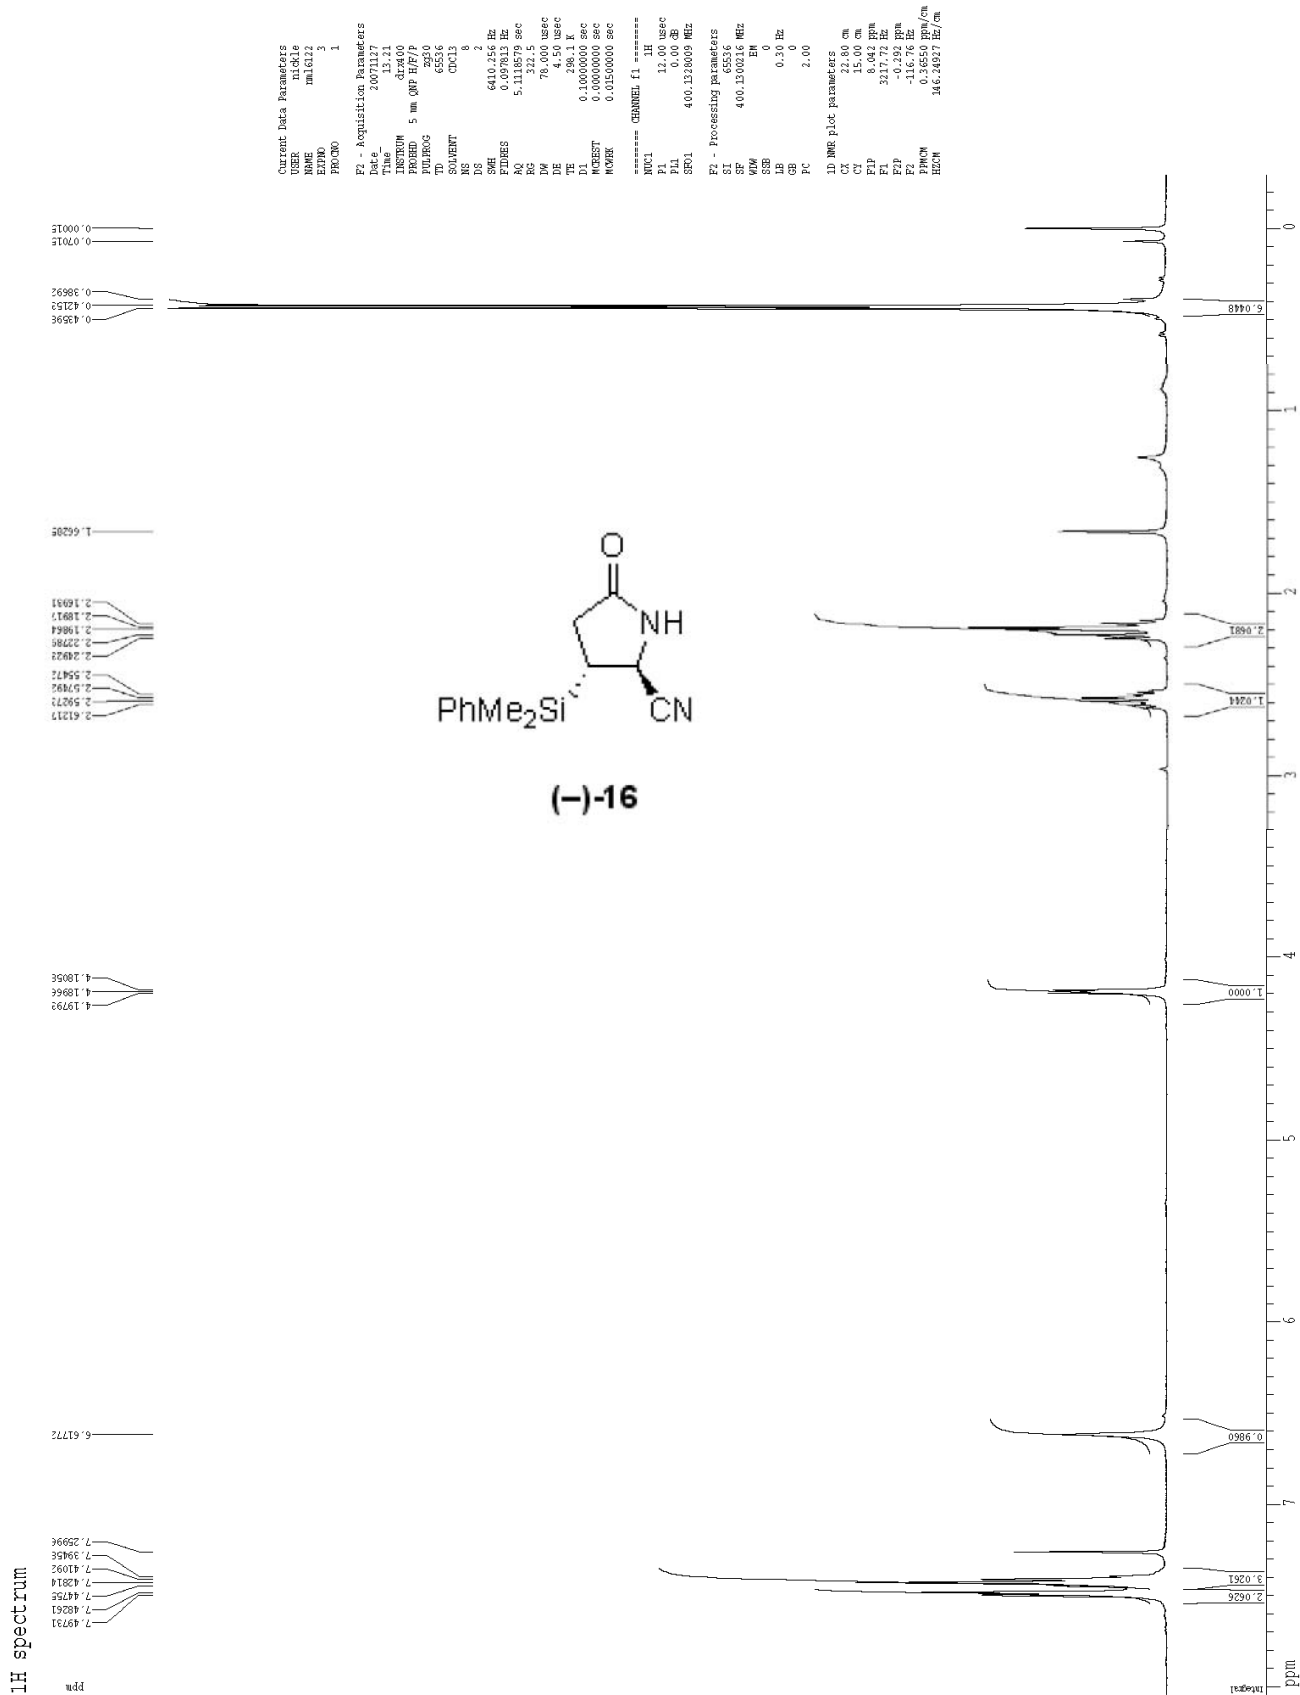

<sup>13</sup>C spectrum with <sup>1</sup>H decoupling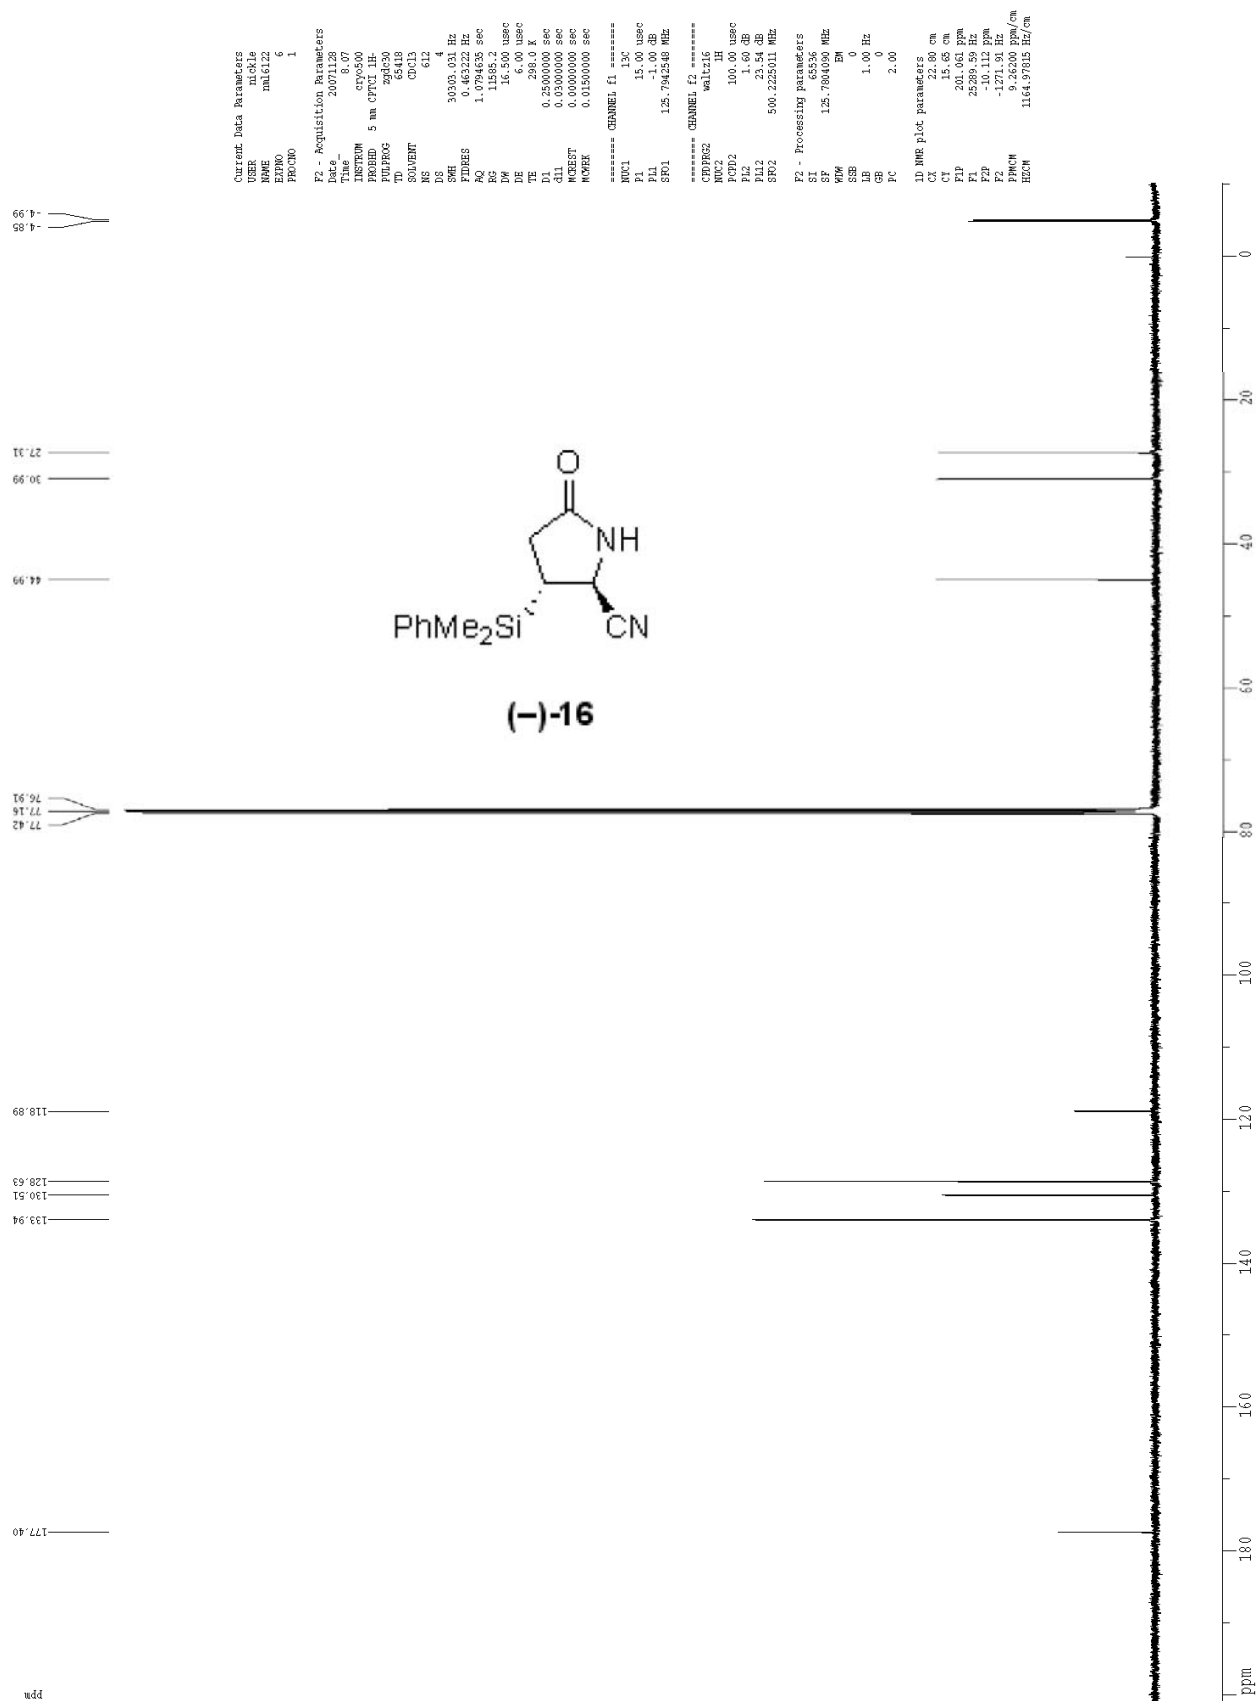

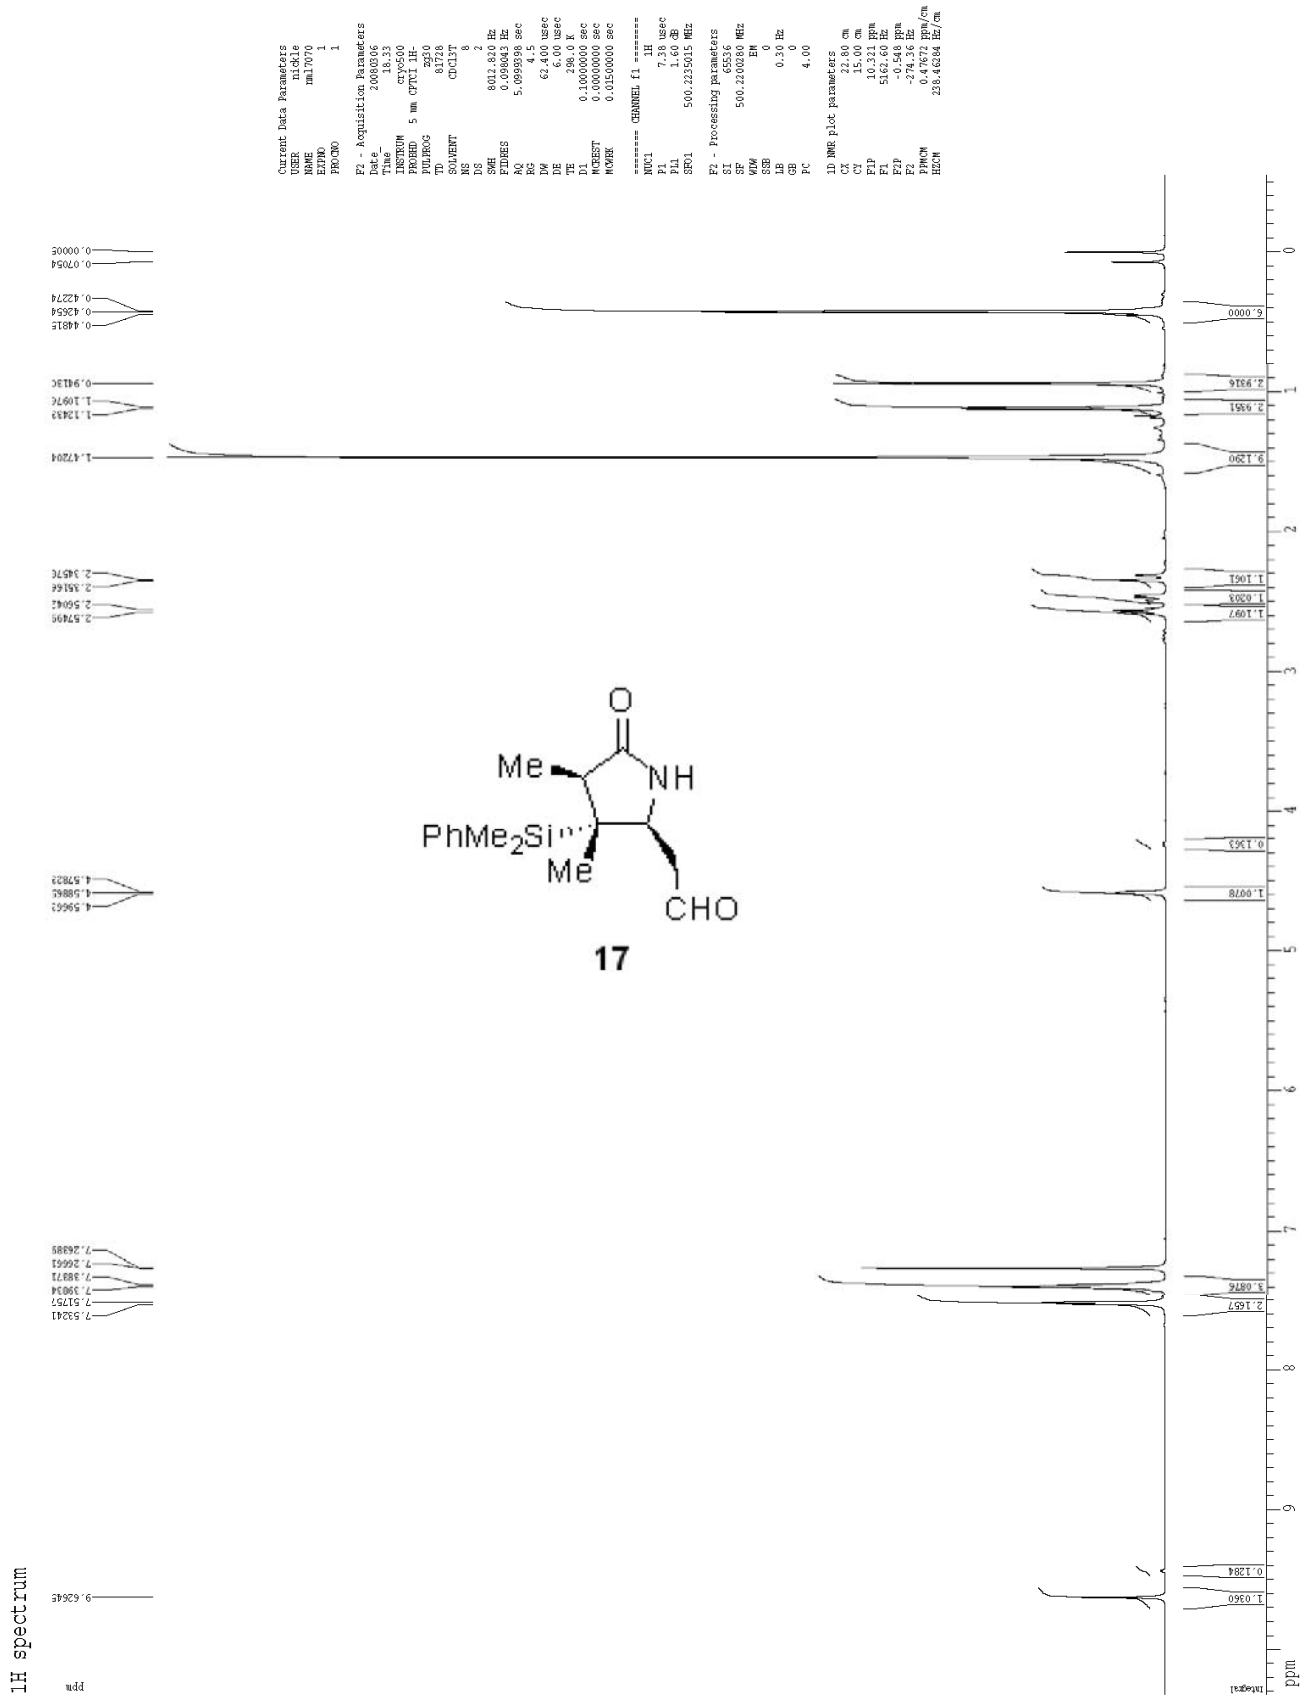

<sup>13</sup>C spectrum with <sup>1</sup>H decoupling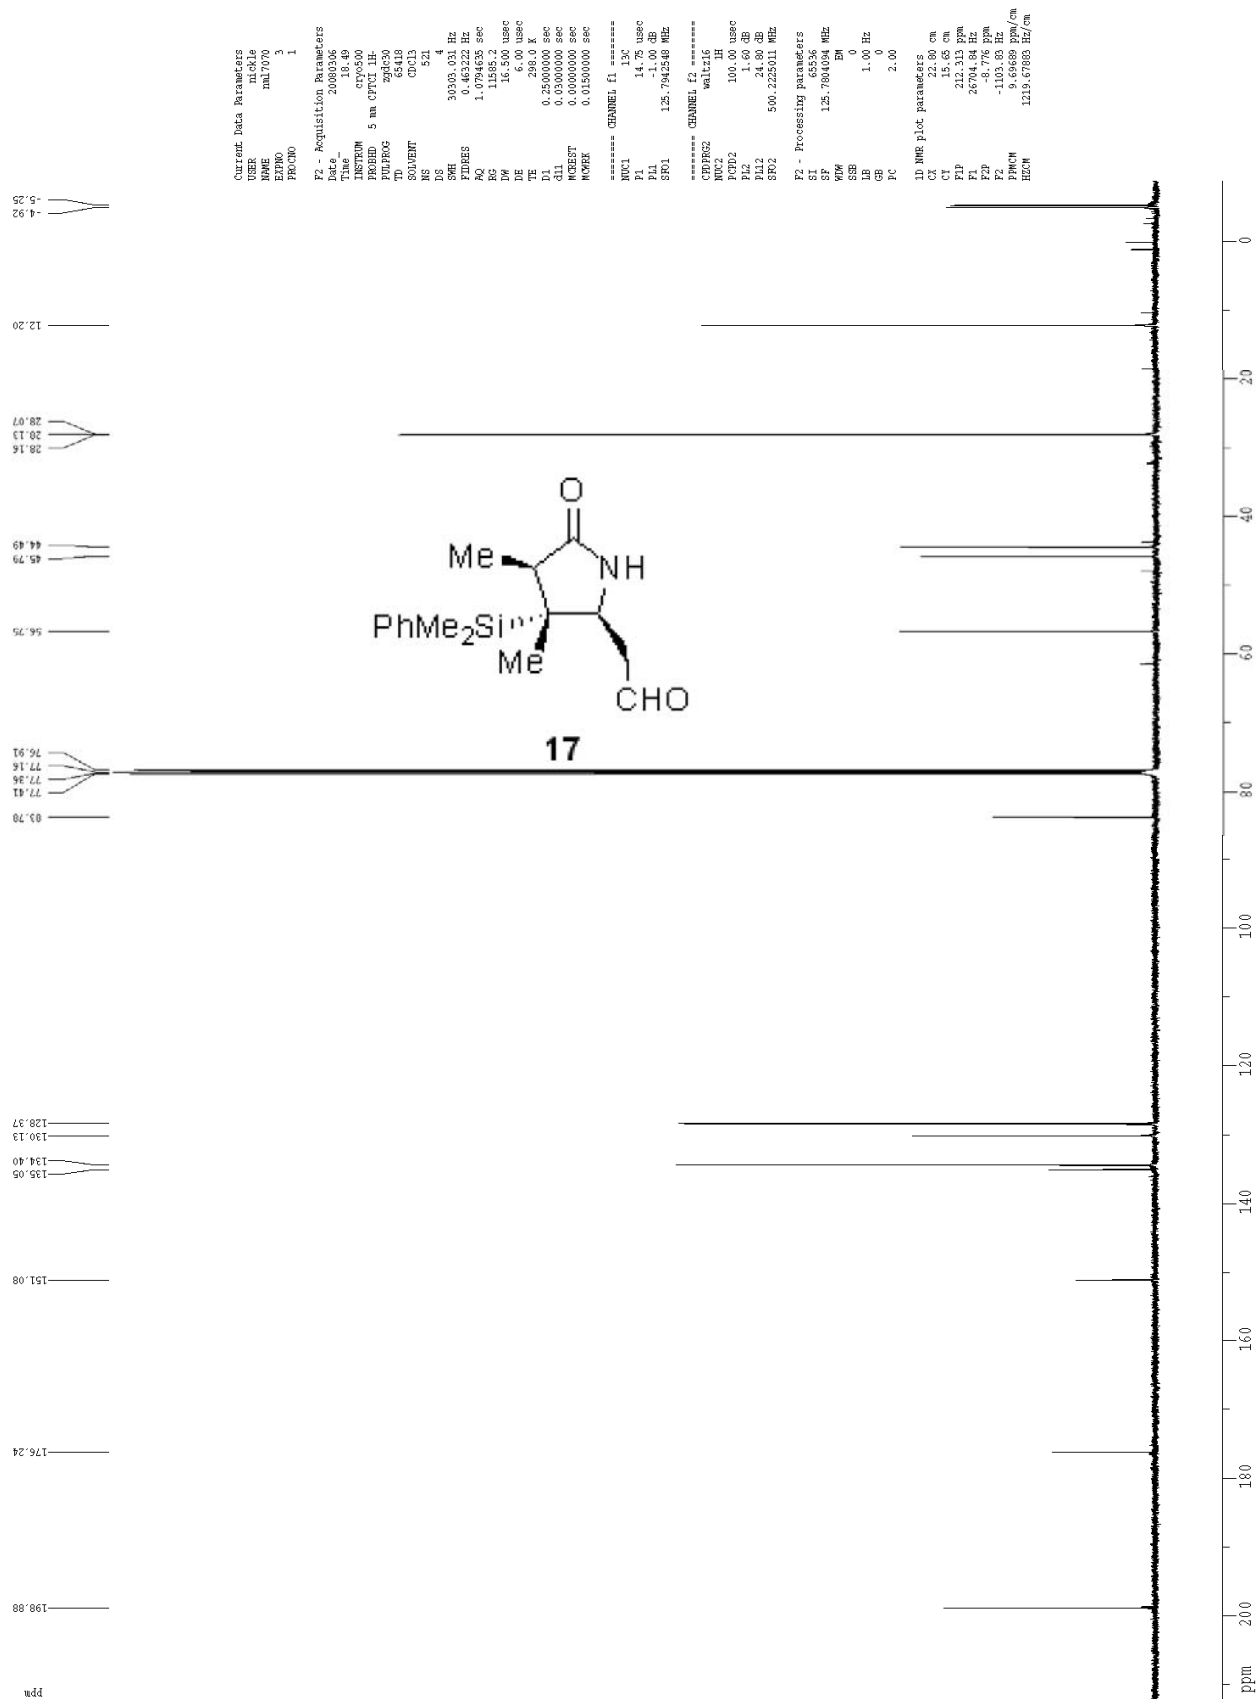

<sup>1</sup>H spectrum

ppm

7.48441  
7.39056  
7.37804  
7.26225

3.56266

2.69931

2.51005

2.49215

2.04494

1.64475

1.49551

1.42700

1.29402

1.27737

1.25901

1.13934

1.06662

1.04820

1.01336

0.99505

0.94105

0.91345

0.40932

0.37315

0.06947

0.00000

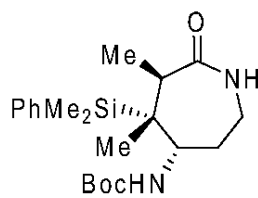

18

Current Data Parameters  
 USER nickle  
 NAME 1817132  
 EXPNO 2  
 PROCNO 1  
 F2 - Acquisition Parameters  
 Date\_ 20080111  
 Time 17.38  
 INSTRUM dr400  
 PROBHD 5 mm QNP H/F/P  
 PULPROG zgpg30  
 F2 - Processing Parameters  
 SI 65536  
 SF 400.1300209 MHz  
 WDM EM  
 SSB 0  
 LB 0.30 Hz  
 GB 0  
 PC 2.00  
 1D NMR plot parameters  
 CX 22.80 cm  
 CY 15.00 cm  
 F1 7.906 ppm  
 F1 3163.34 Hz  
 F2 -0.349 ppm  
 F2 -139.45 Hz  
 FWHM 0.36205 ppm/cm  
 HZCM 344.86819 Hz/cm

===== CHANNEL f1 =====

NUC1 1H

P1 12.00 usec

P11 0.00 dB

SFO1 400.1328009 MHz

F2 - Processing Parameters

SI 65536

SF 400.1300209 MHz

WDM EM

SSB 0

LB 0.30 Hz

GB 0

PC 2.00

1D NMR plot parameters

CX 22.80 cm

CY 15.00 cm

F1 7.906 ppm

F1 3163.34 Hz

F2 -0.349 ppm

F2 -139.45 Hz

FWHM 0.36205 ppm/cm

HZCM 344.86819 Hz/cm

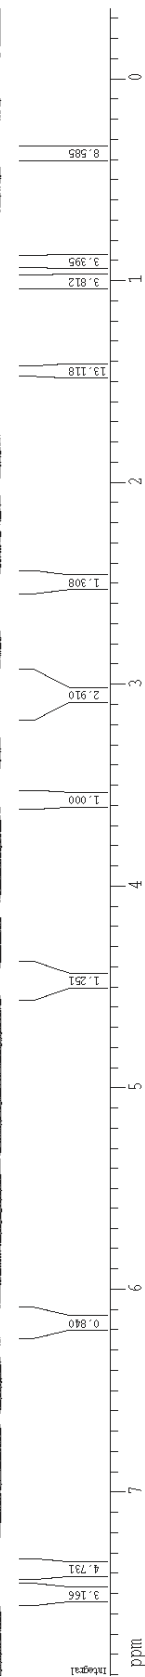



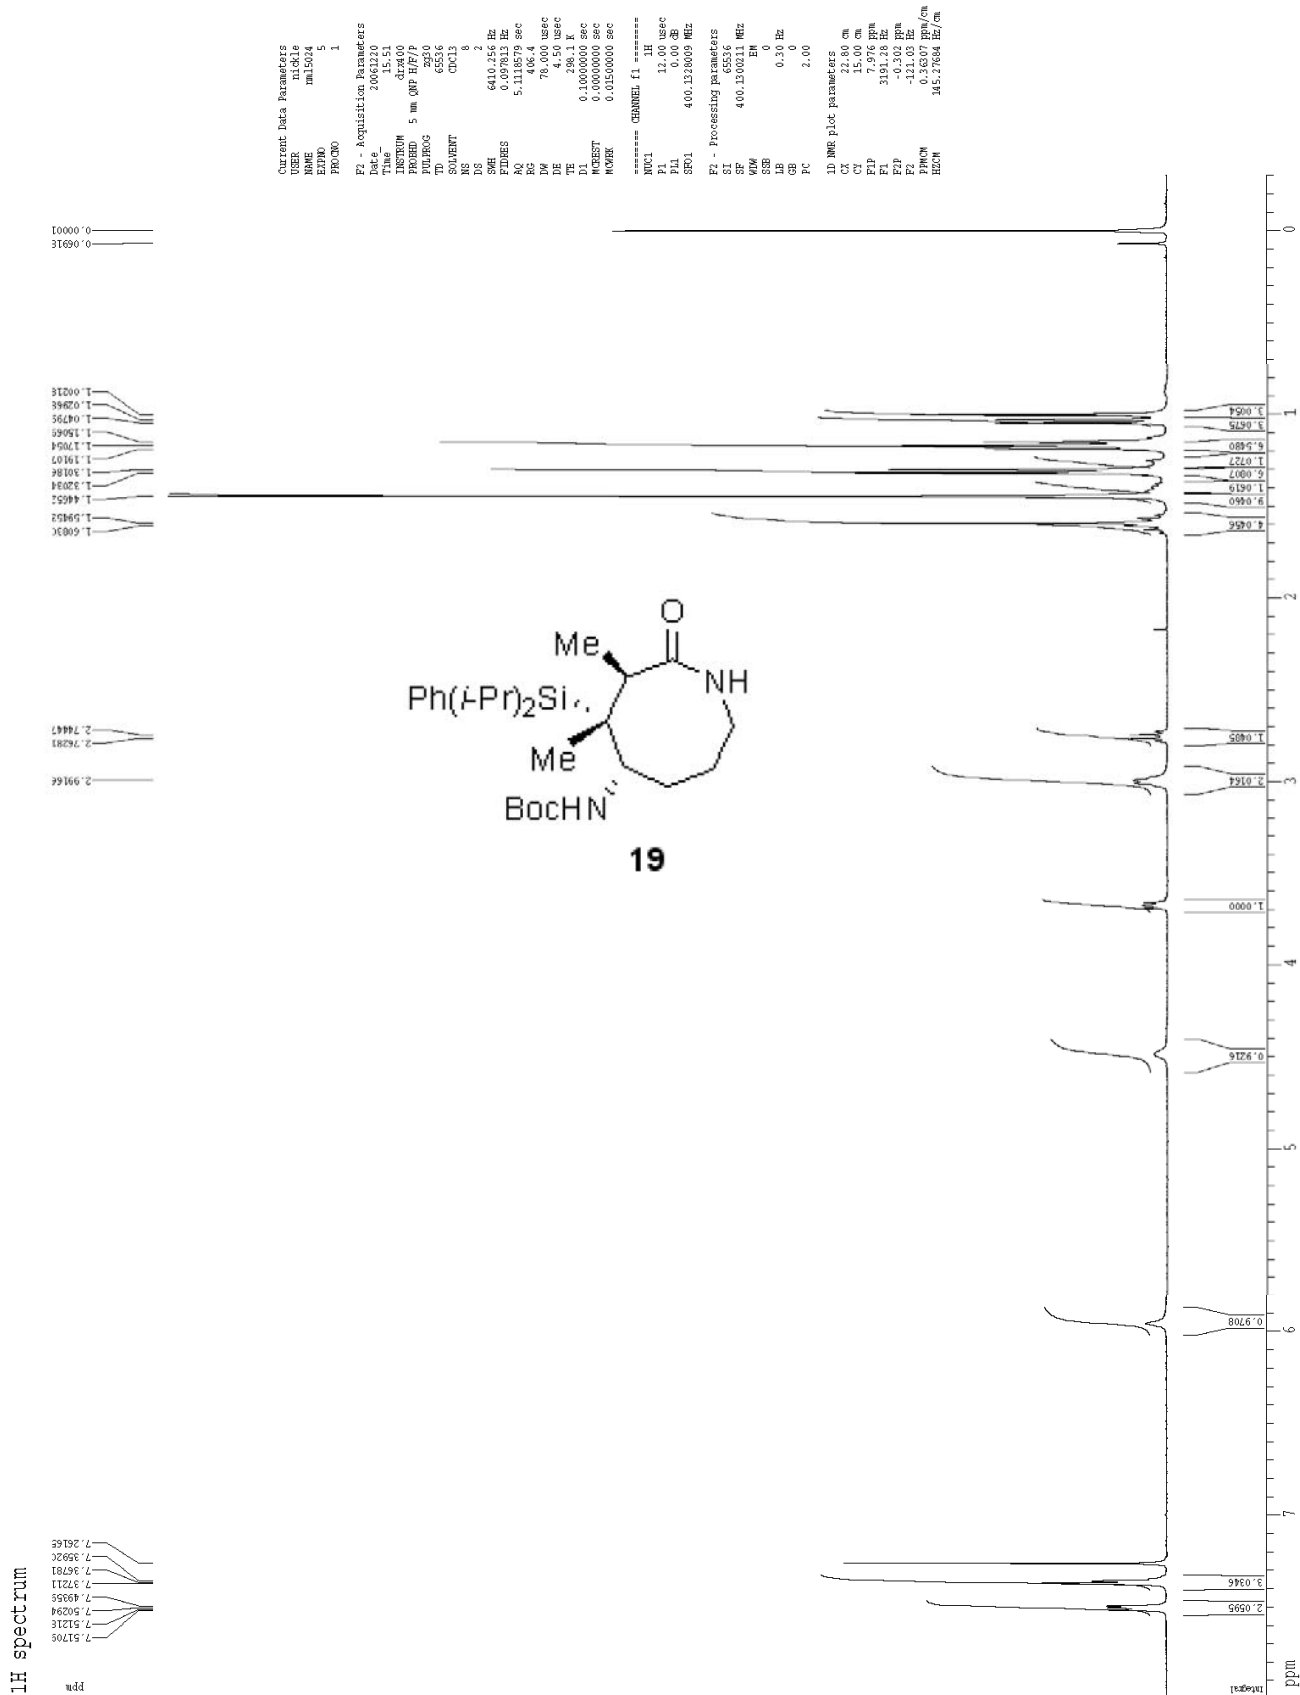

<sup>13</sup>C spectrum with <sup>1</sup>H decoupling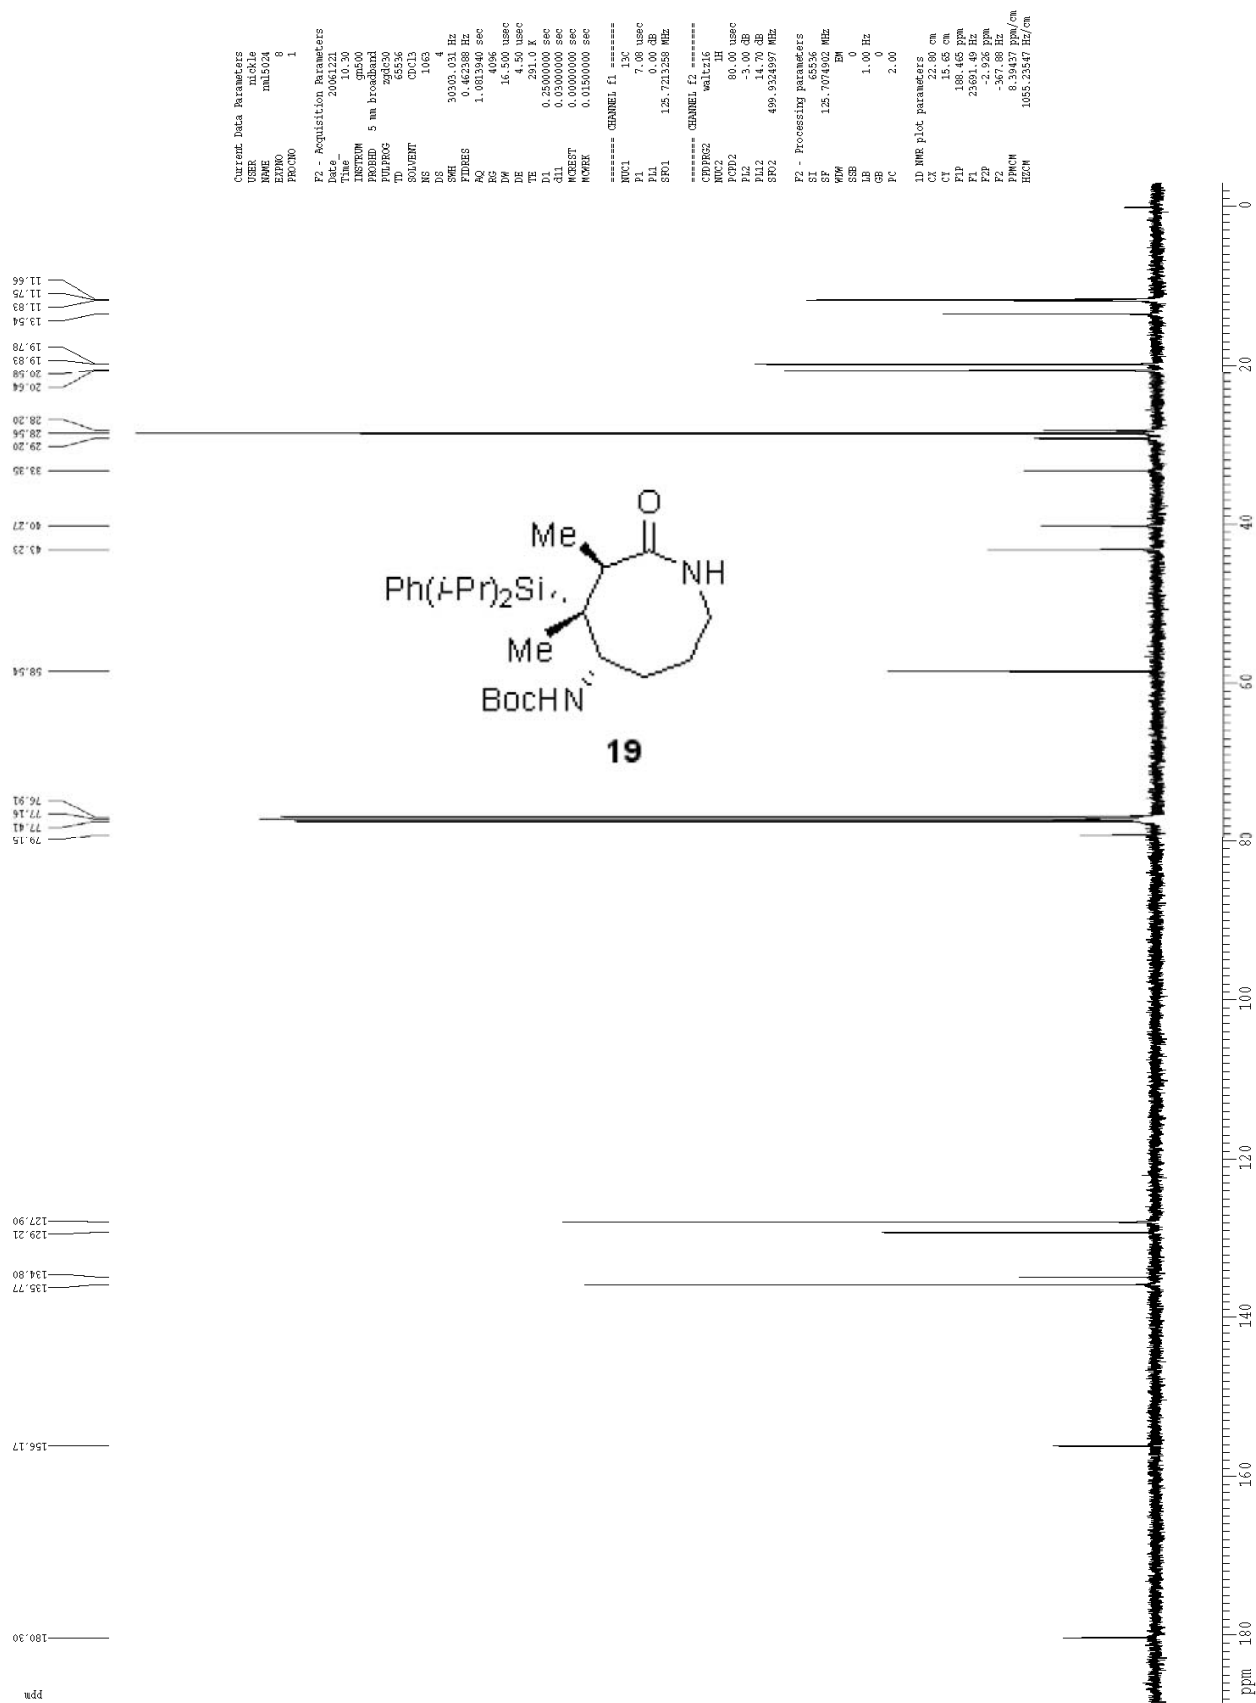

<sup>1</sup>H spectrum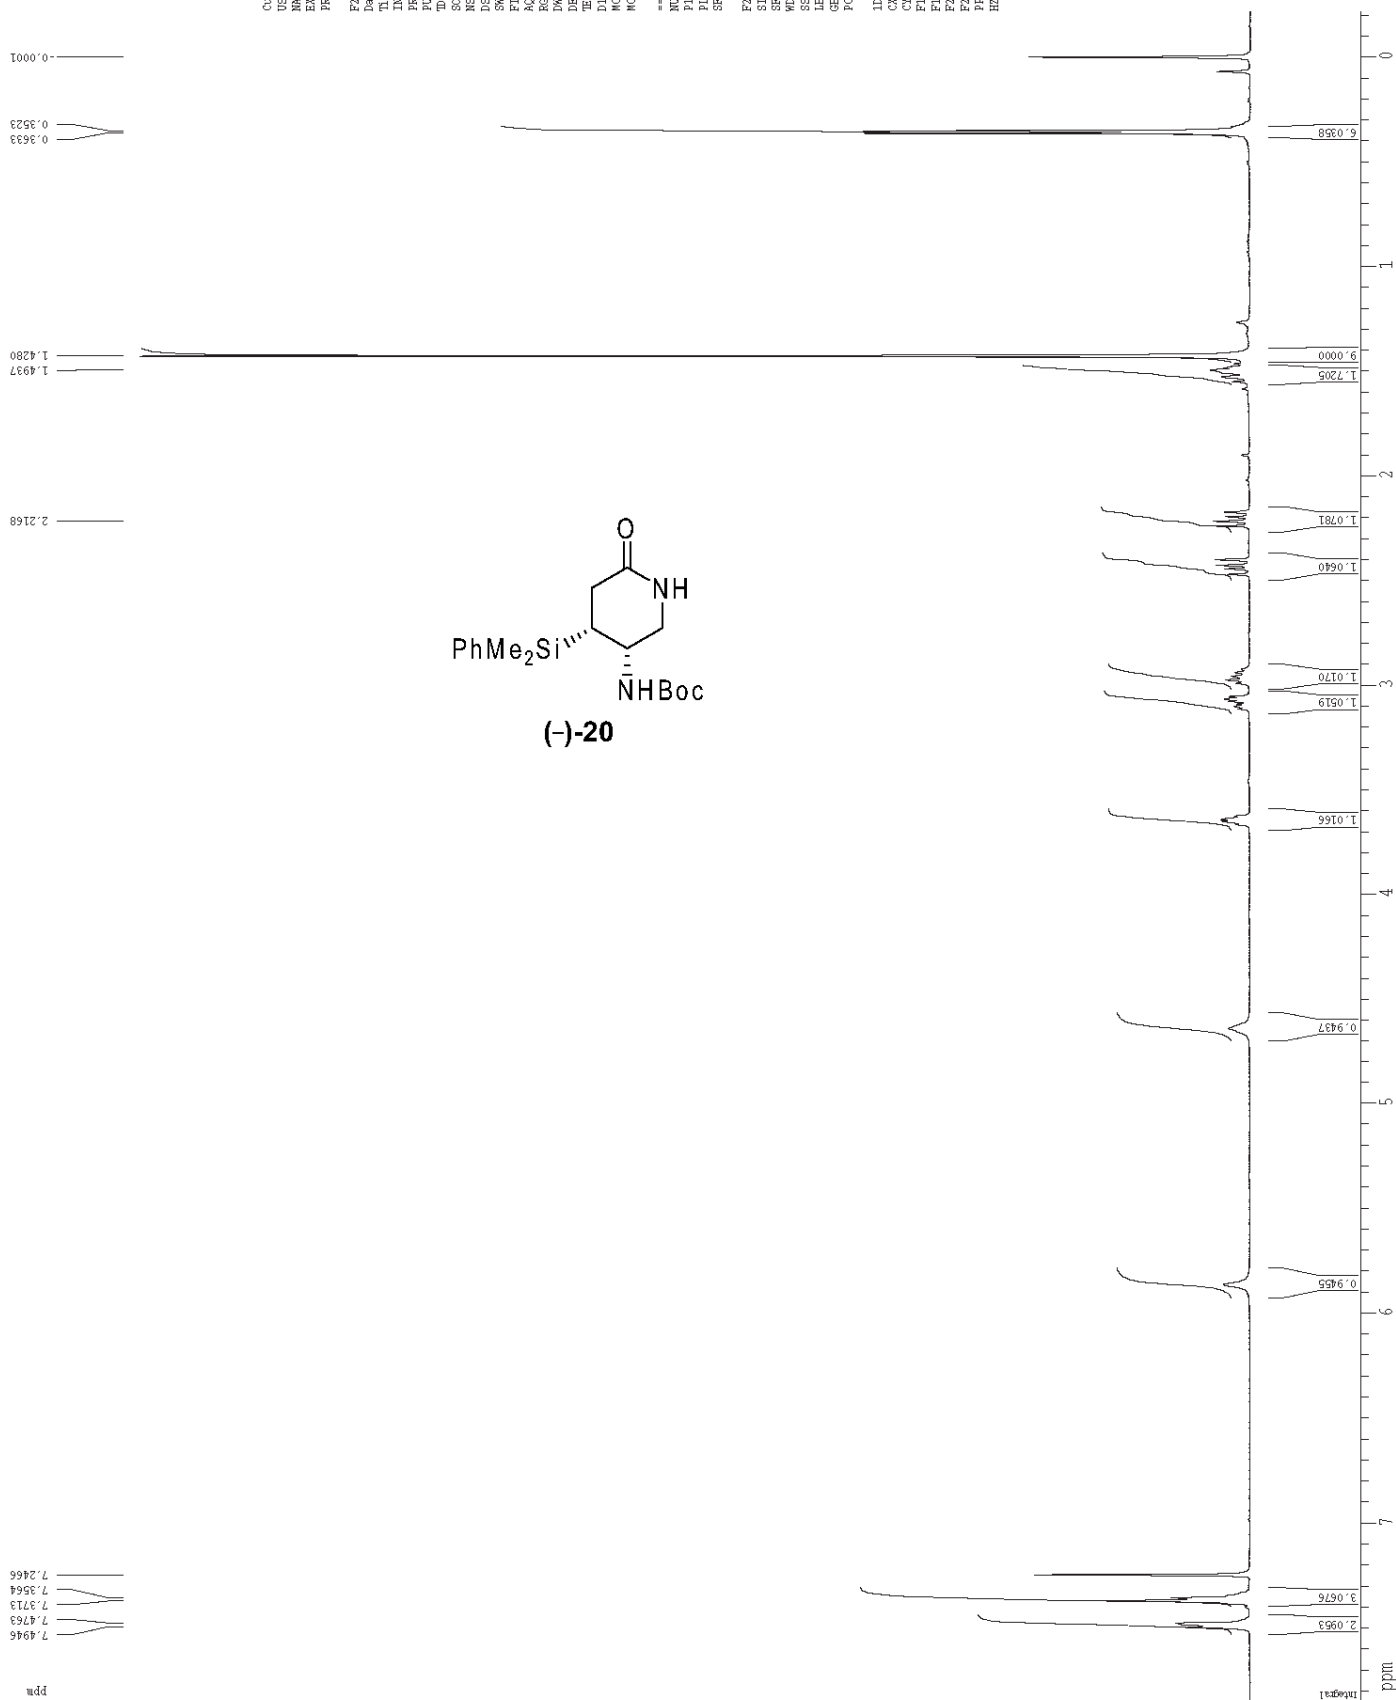

<sup>13</sup>C spectrum with <sup>1</sup>H decoupling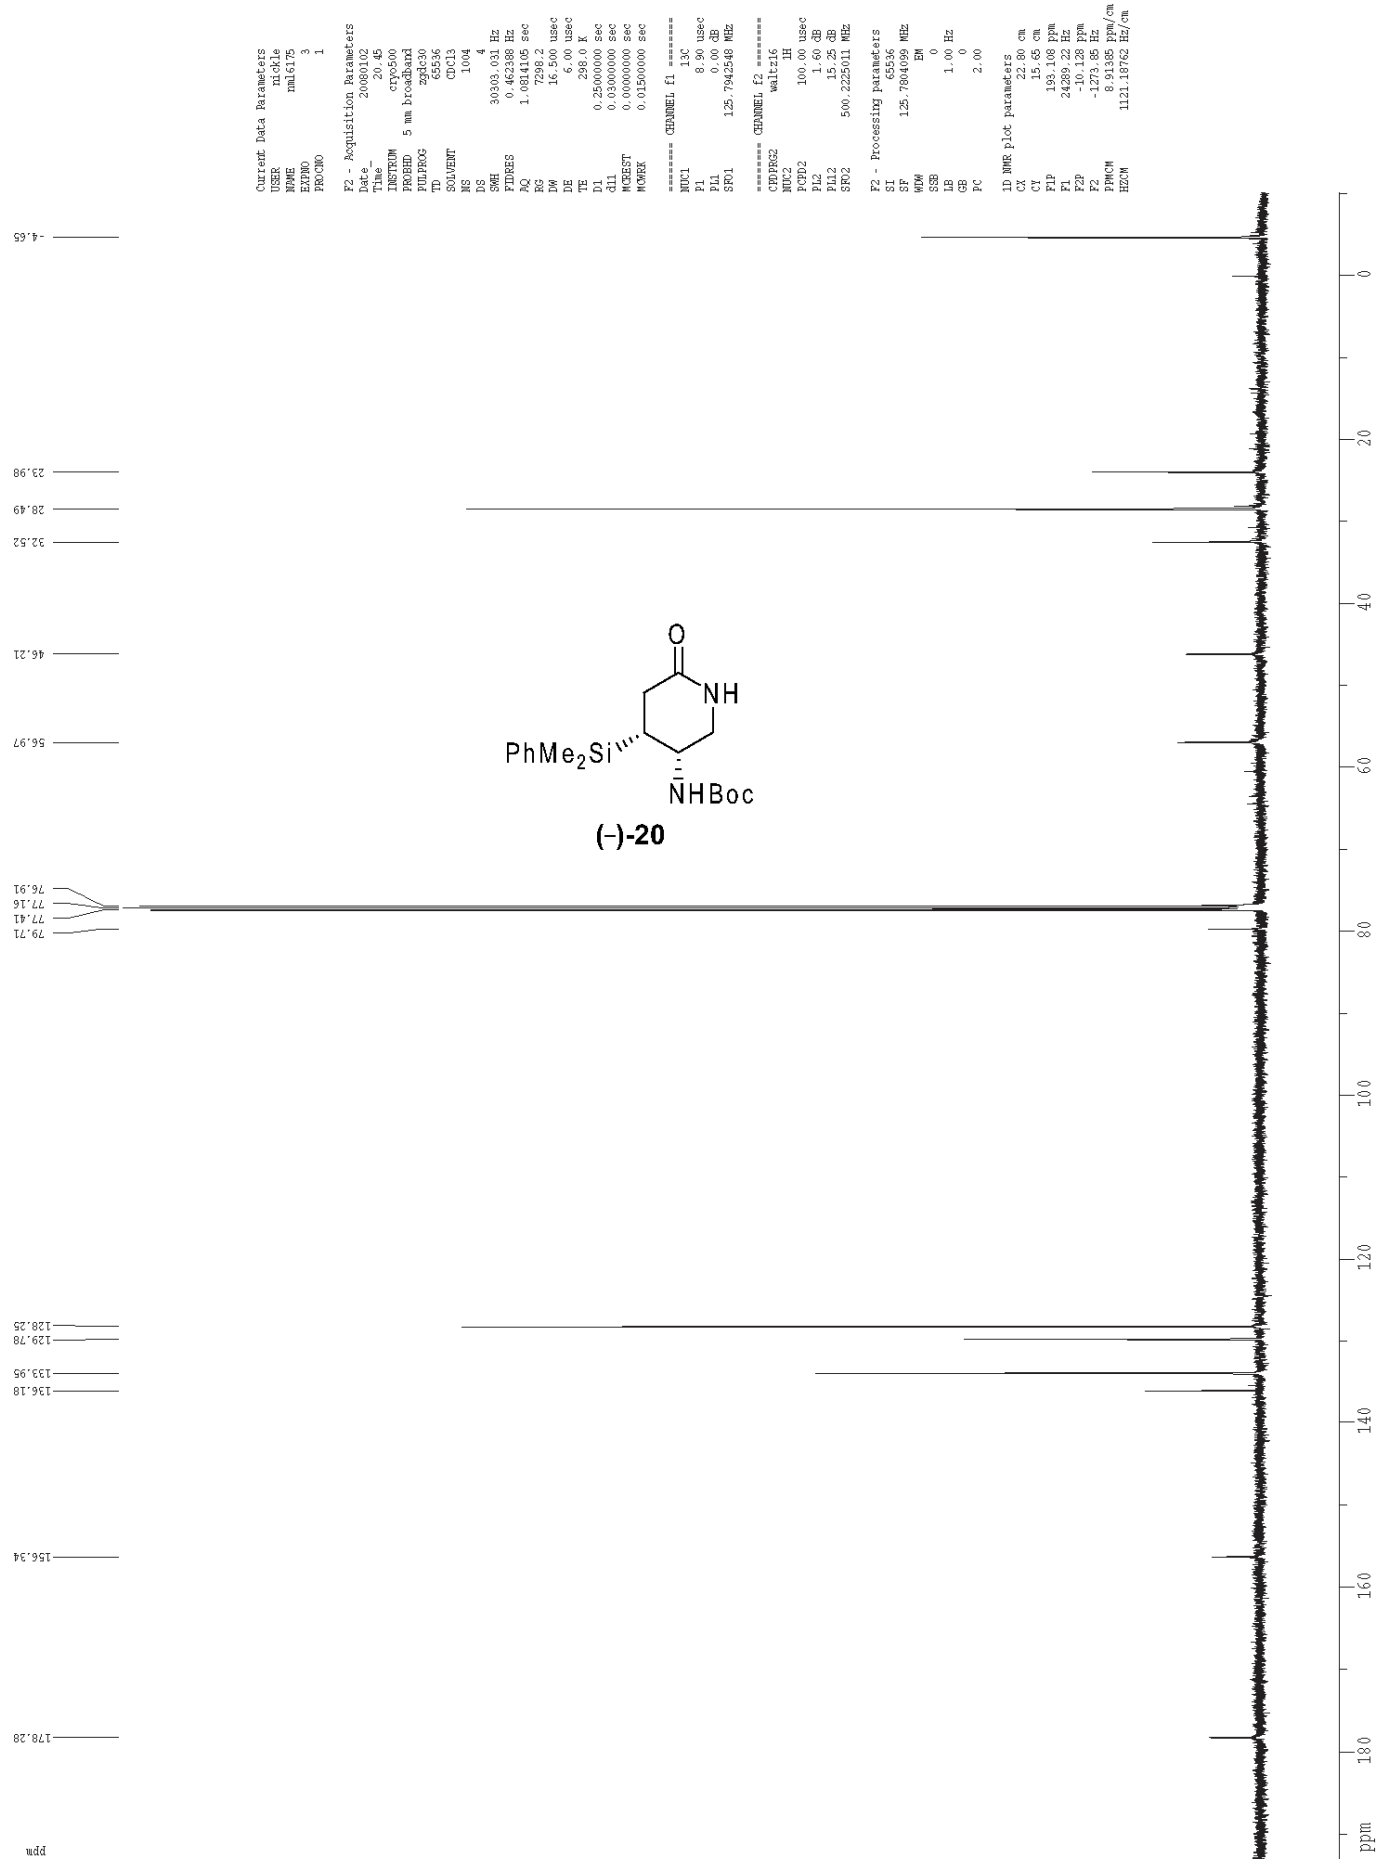

<sup>1</sup>H spectrum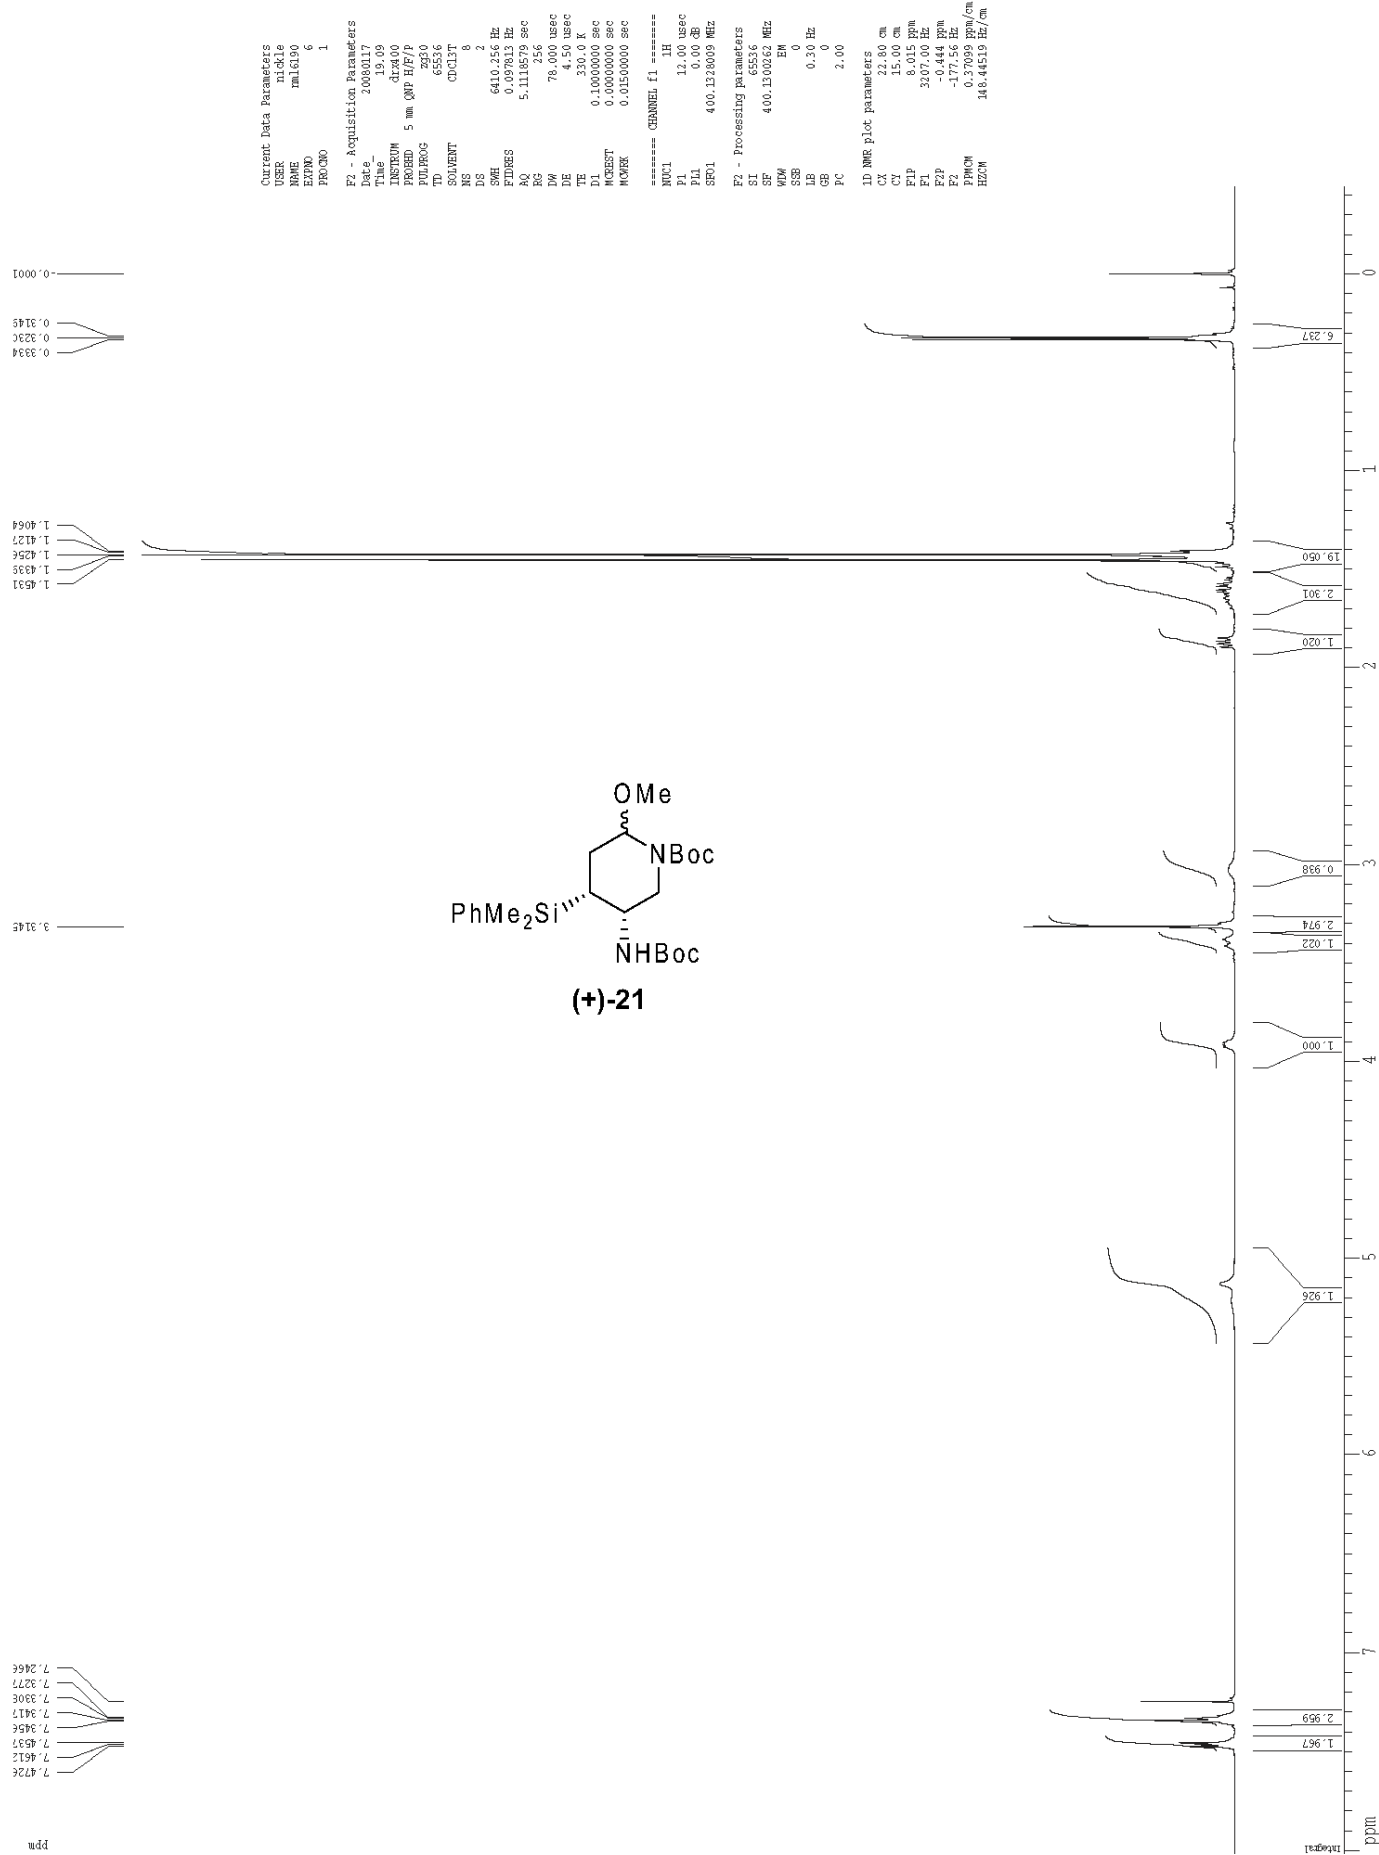

## 13C spectrum with 1H decoupling

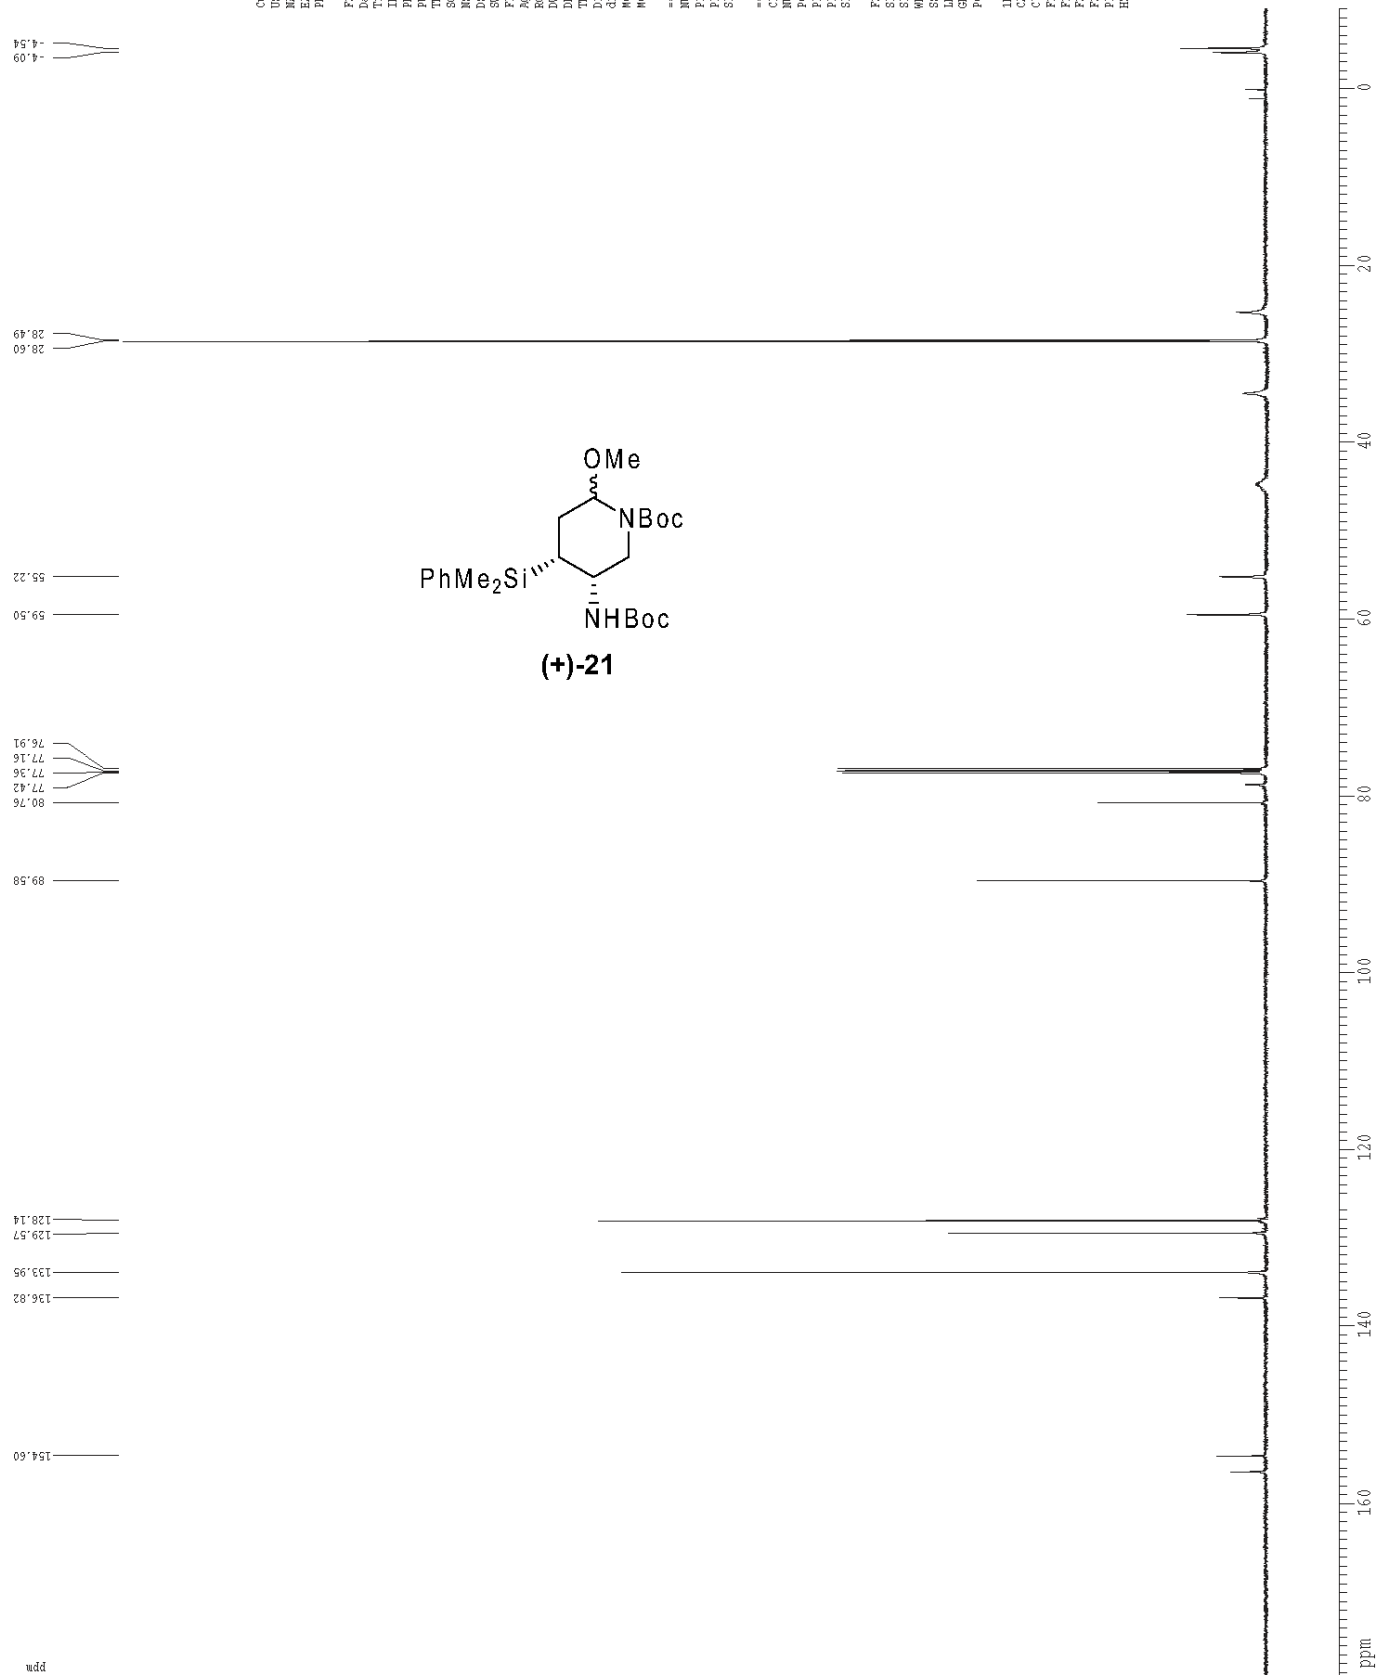

1H spectrum

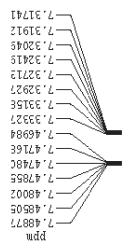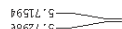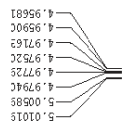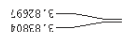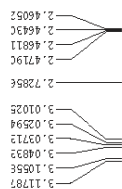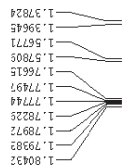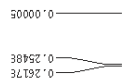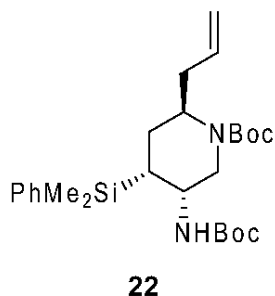

Current Data Parameters  
 USER nickie  
 NAME 20071010  
 EXPNO 2  
 PROCNO 1  
 F2 - Acquisition Parameters  
 Date\_ 20071010  
 Time 8.07  
 INSTRUM gms500  
 PROBHD 5 mm broadband  
 PULPROG zgpg30  
 TD 65536  
 SFO1 400.146098 MHz  
 SOLVENT DMSO-D  
 NS 8  
 DS 2  
 SWH 8402.810 Hz  
 FIDRES 0.098043 Hz  
 AQ 5.0998774 sec  
 RG 724.1  
 DW 62.400 usec  
 DE 6.00 usec  
 TE 300.2 K  
 T1 3.00 sec  
 T1RHO 0.1000000 sec  
 NOEST 0.0000000 sec  
 NOEXET 0.0150000 sec  
 ===== CHANNEL f1 =====  
 NUC1 1H  
 P1 12.00 usec  
 PL1 -3.00 dB  
 SFO1 400.146098 MHz  
 F2 - Processing parameters  
 SI 65536  
 SF 499.8250279 MHz  
 WDM EM  
 SSF 0  
 SSB 0  
 LB 0.30 Hz  
 GB 0  
 PC 4.00  
 1D NMR Plot Parameters  
 CX 22.80 cm  
 CY 15.00 cm  
 F1F 7.882 ppm  
 F1 3939.83 Hz  
 F2F -0.419 ppm  
 F2 -209.31 Hz  
 FWHM 0.36409 ppm/cm  
 HZCM 181.97949 Hz/cm

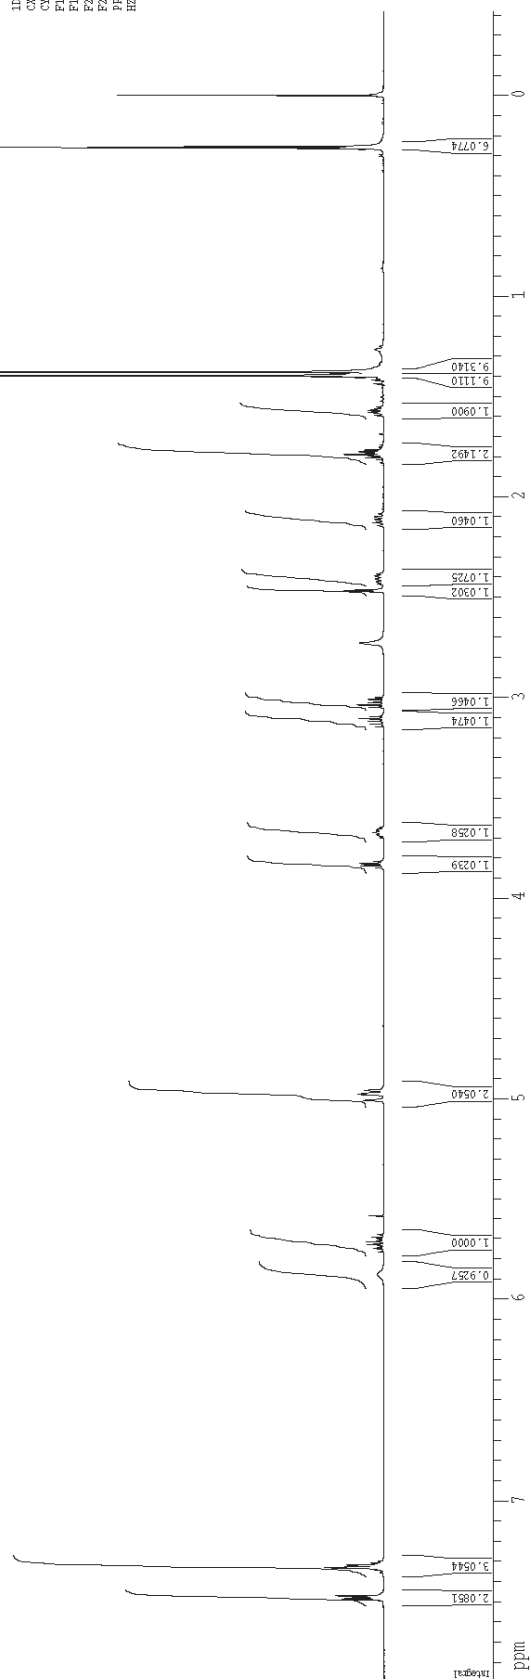

<sup>13</sup>C spectrum with <sup>1</sup>H decoupling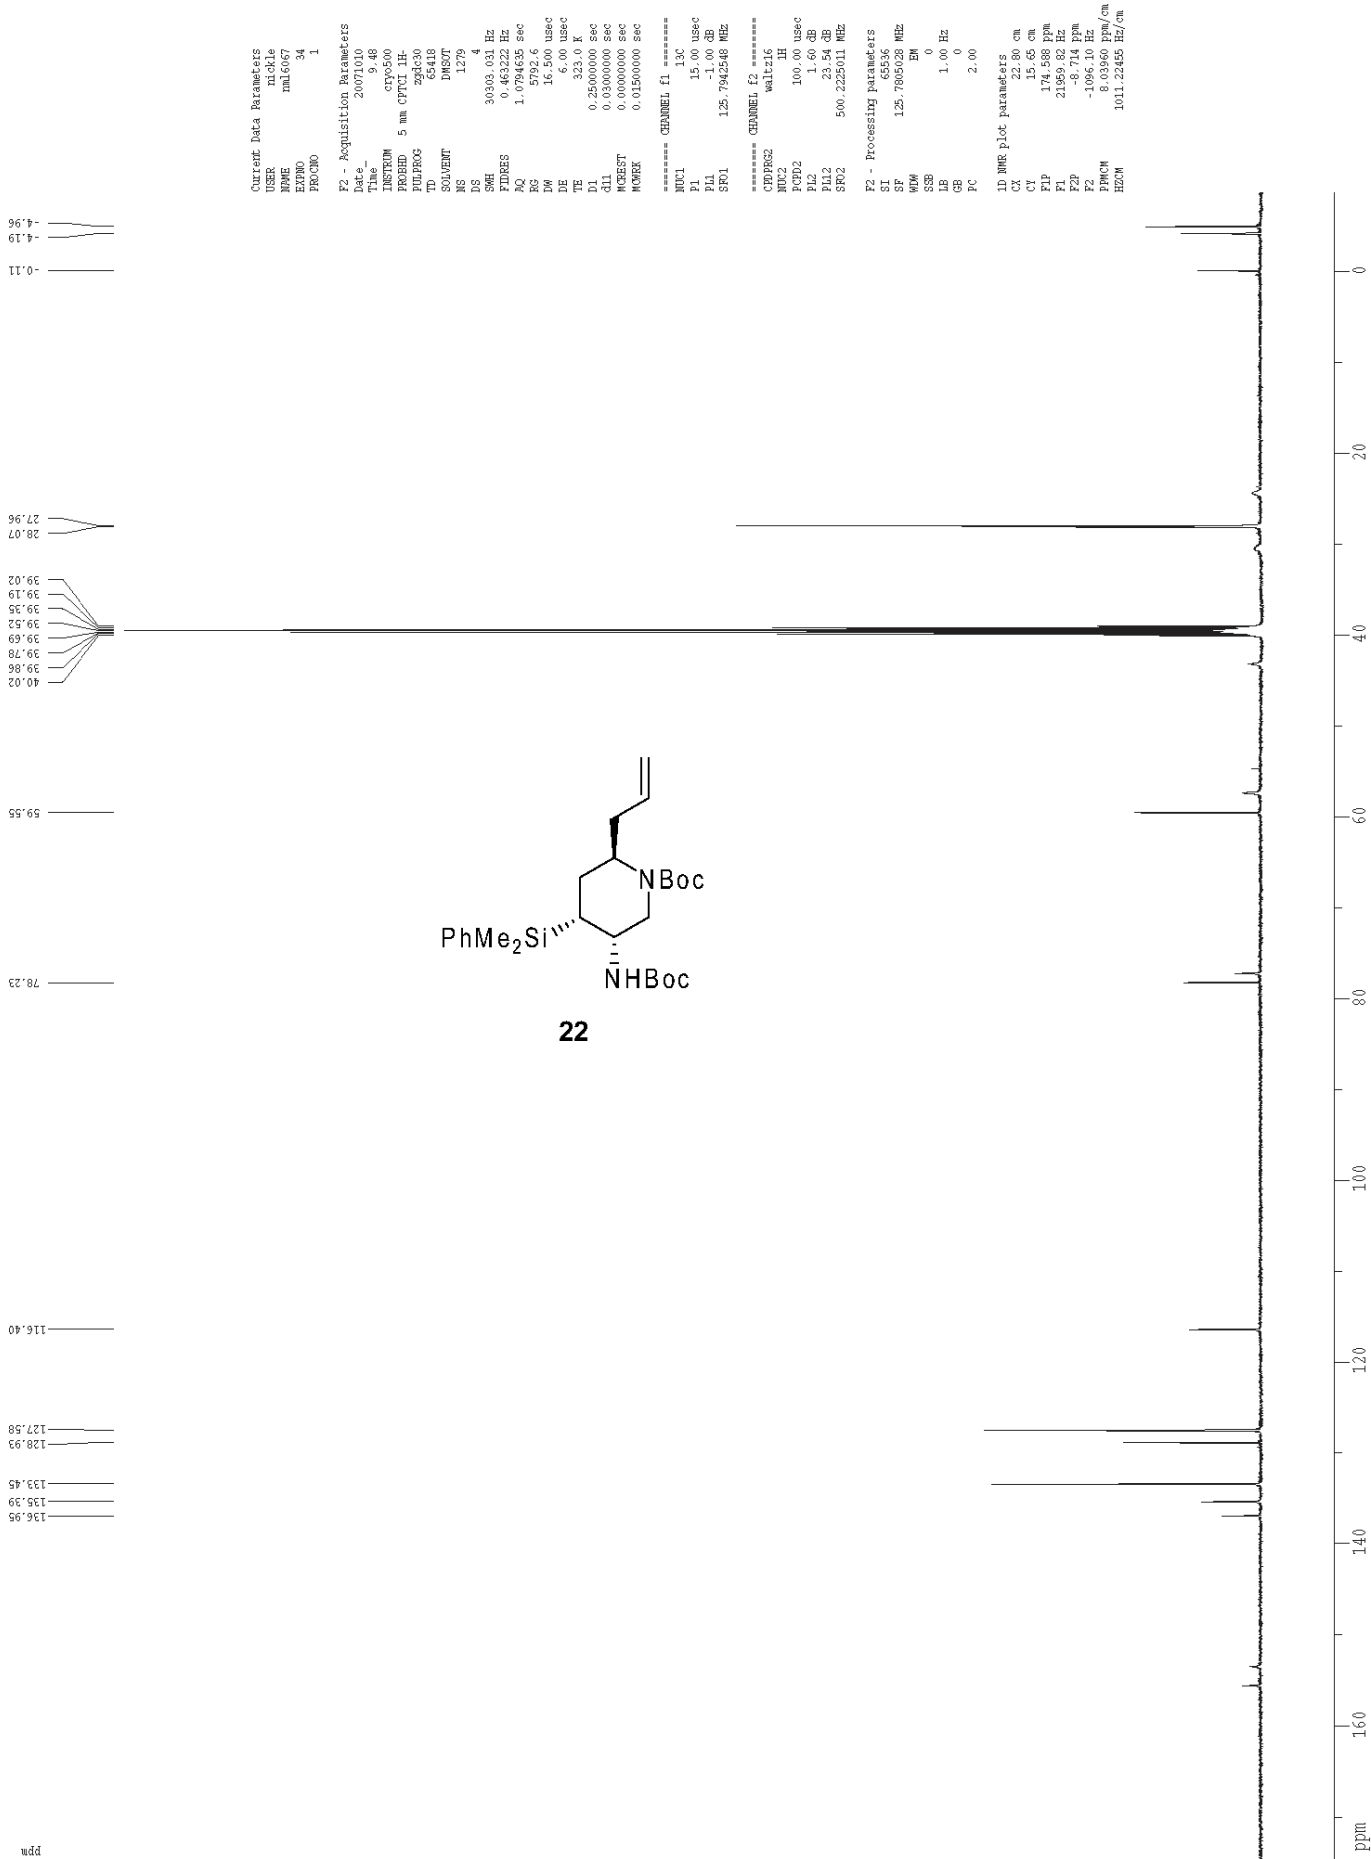



<sup>1</sup>H spectrum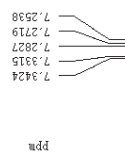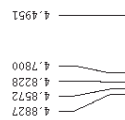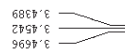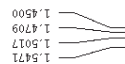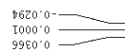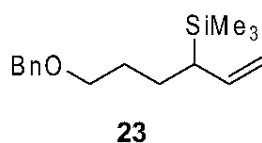

Current Data Parameters  
 USER nickle  
 NAME nm16186  
 ACQNO 1  
 PROCNO 1  
 F2 - Acquisition Parameters  
 Date 20080103  
 Time 16.29  
 INSTRUM dxt400  
 PROHD 5 mm QNP H/F/P  
 PULPROG zgpg30  
 TD 65536  
 SOLVENT CDCl3  
 NS 2  
 DS 2  
 SWH 6410.256 Hz  
 FIDRES 0.097813 Hz  
 AQ 5.1118579 sec  
 RG 203.2  
 DW 78.000 usec  
 DE 4.50 usec  
 TE 297.9 K  
 D1 0.10000000 sec  
 MCHST 0.00000000 sec  
 MCHPK 0.01500000 sec  
 ===== CHANNEL f1 =====  
 NUCL1 1H  
 P1 12.00 usec  
 PL1 0.00 dB  
 SFO1 400.1328009 MHz  
 F2 - Processing parameters  
 SI 65536  
 SF 400.1328009 MHz  
 RG 1  
 SSF 0  
 LB 0.30 Hz  
 GB 0  
 PC 2.00  
 1D NMR plot parameters  
 CX 22.80 cm  
 CY 15.00 cm  
 FIP 7.808 ppm  
 FL 3124.16 Hz  
 F2 4.00 ppm  
 F3 -147.34 Hz  
 PPM0W 0.35860 ppm/cm  
 HZ0W 143.48653 Hz/cm

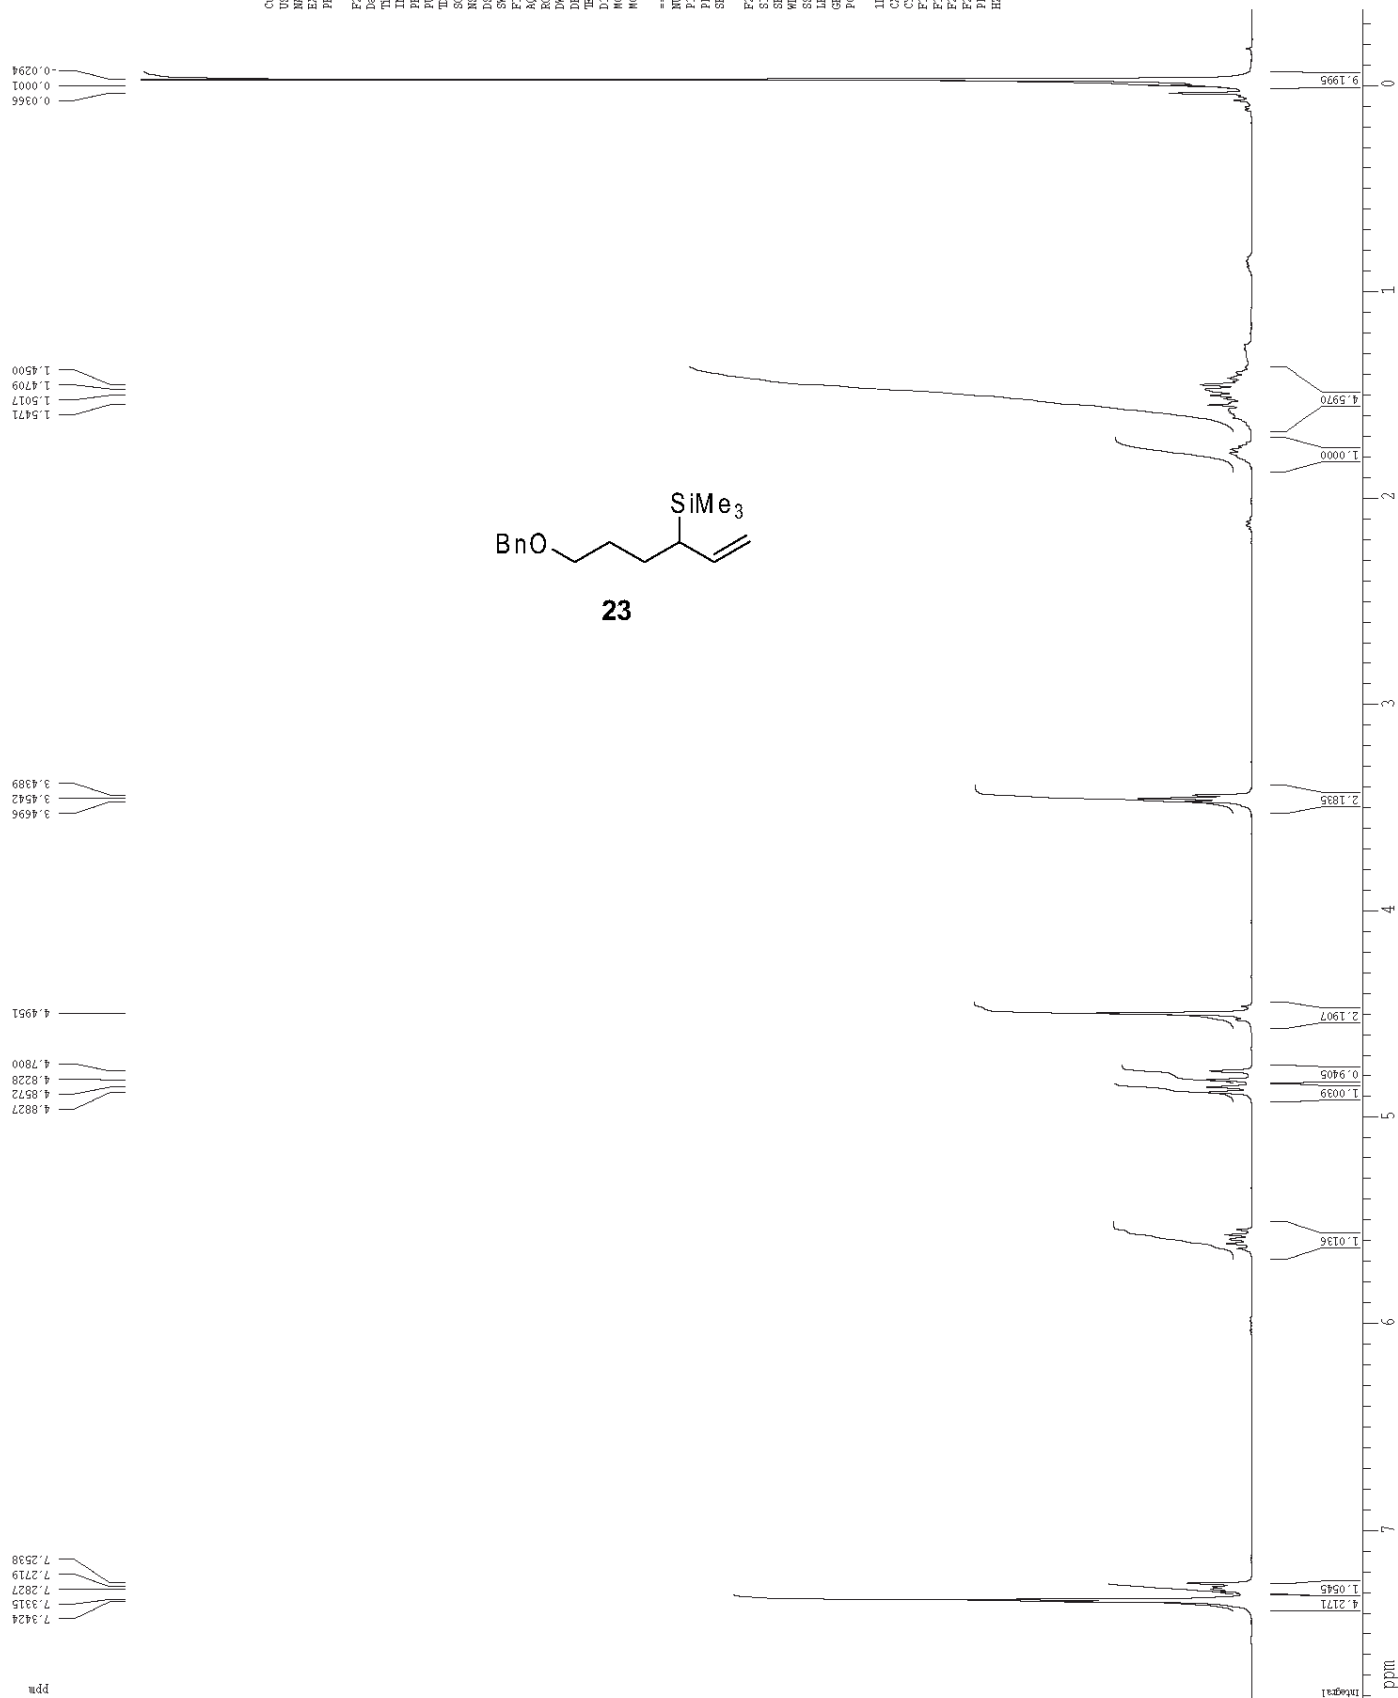

<sup>13</sup>C spectrum with <sup>1</sup>H decoupling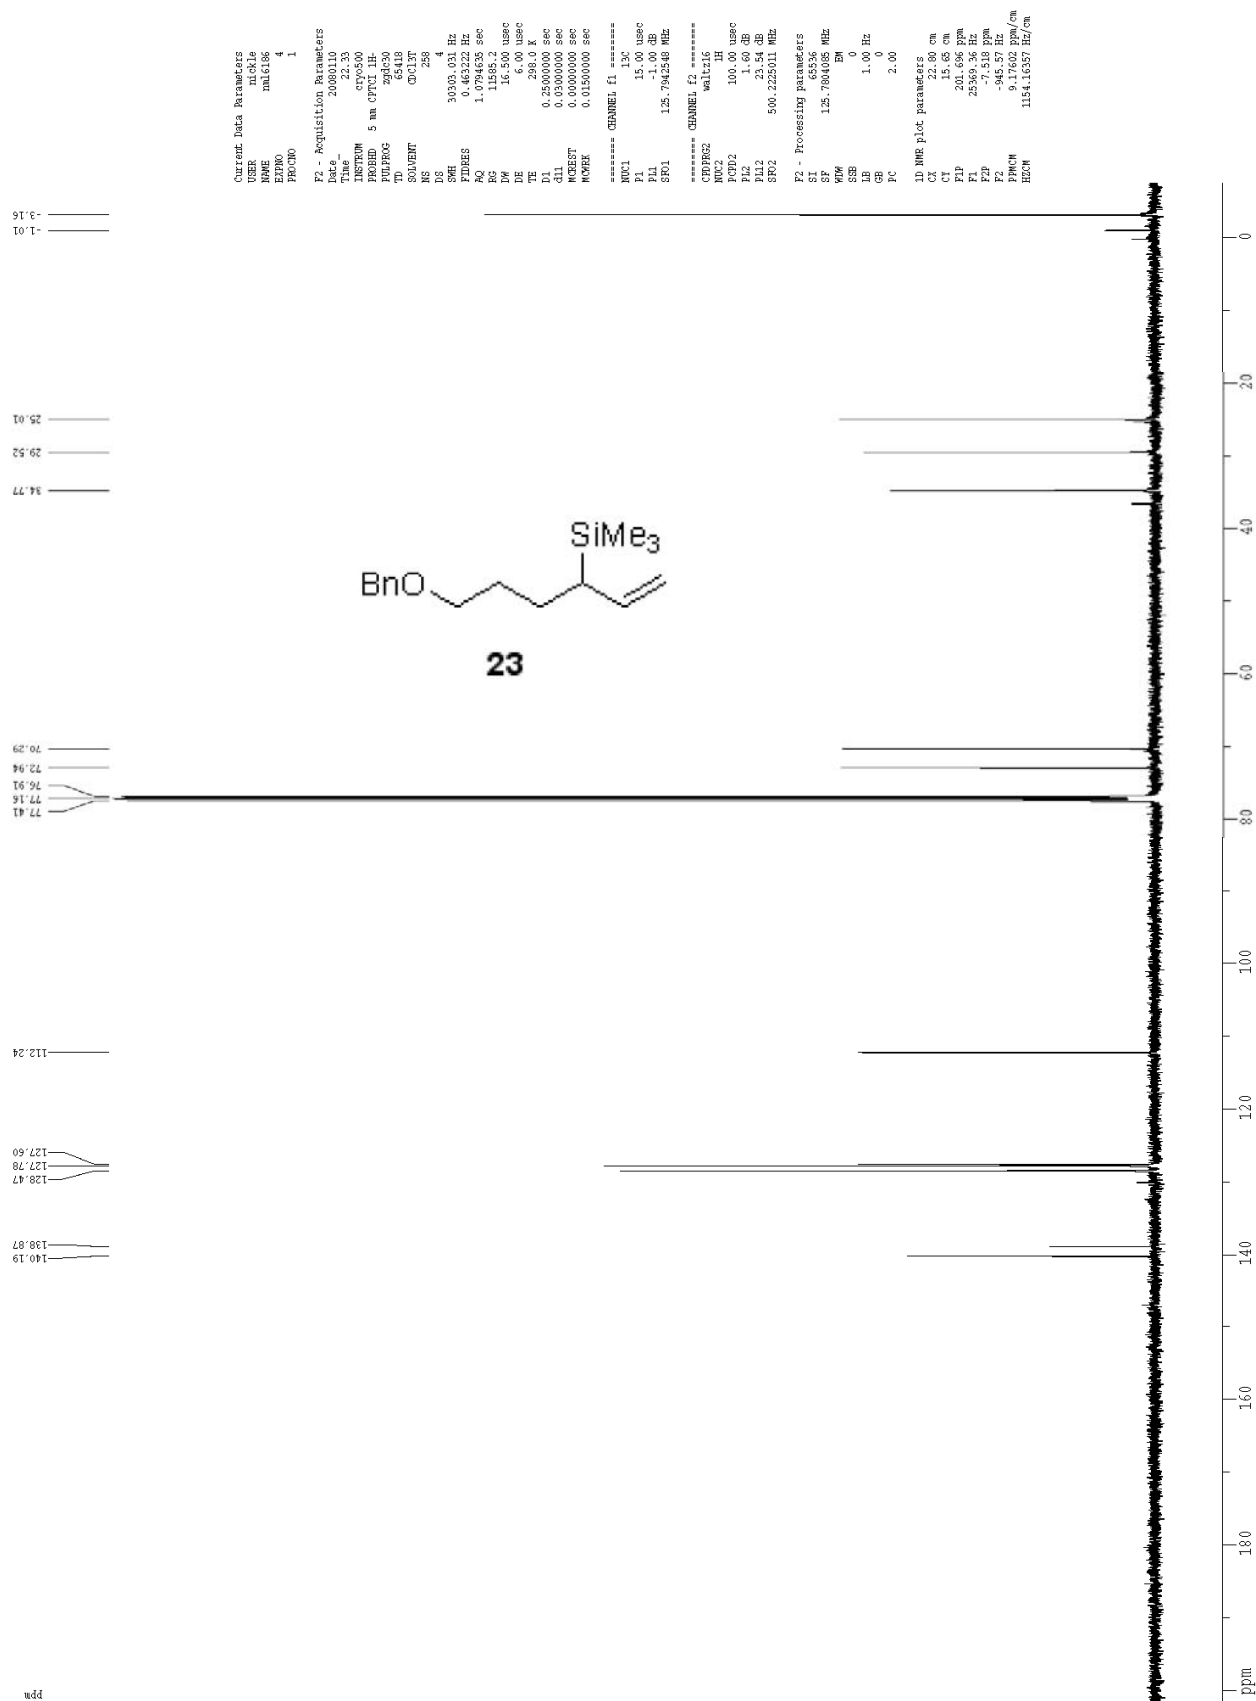

1H spectrum

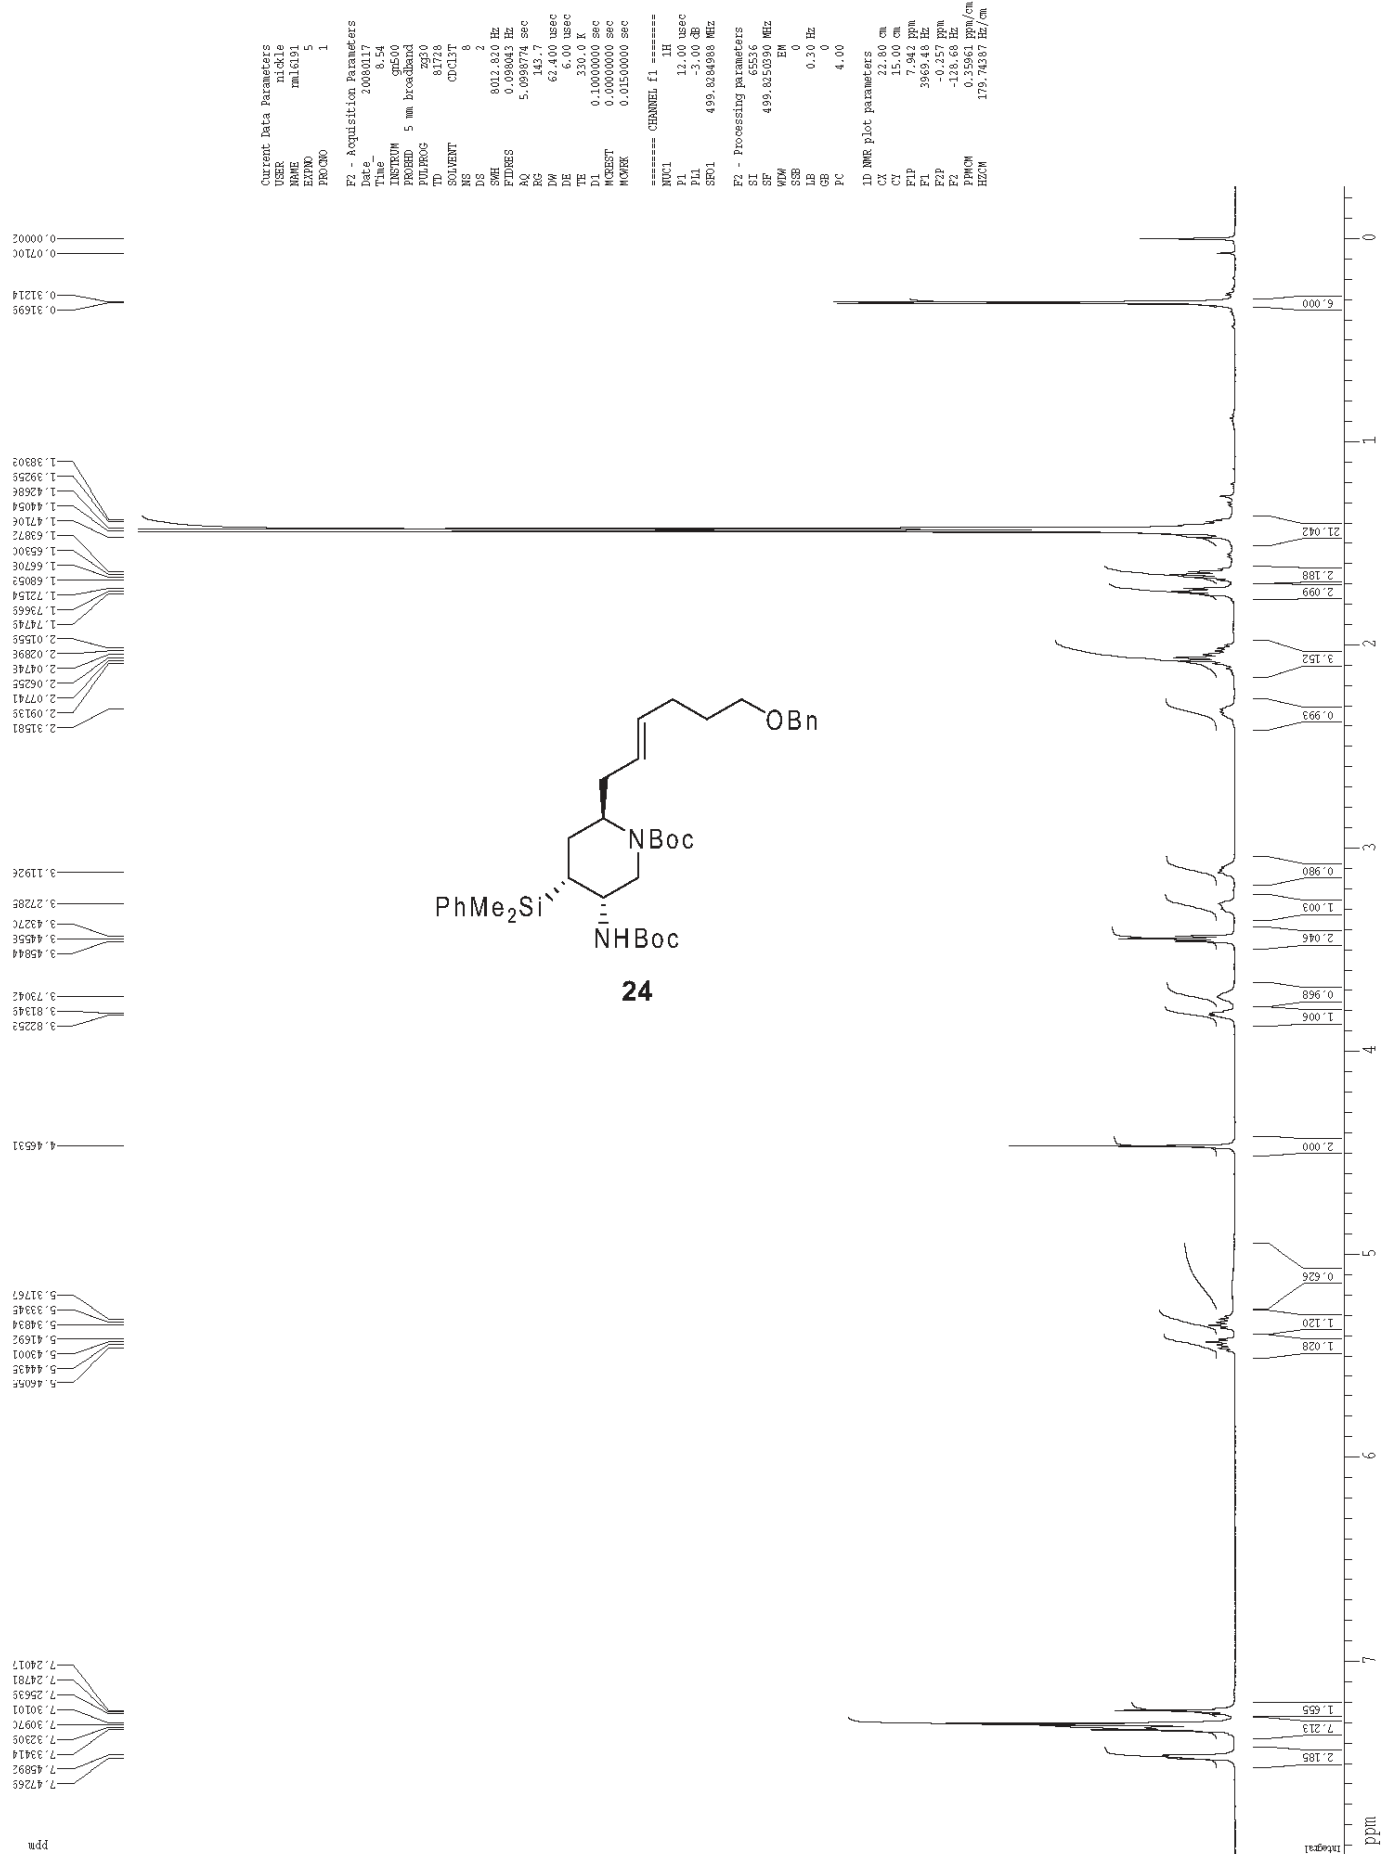

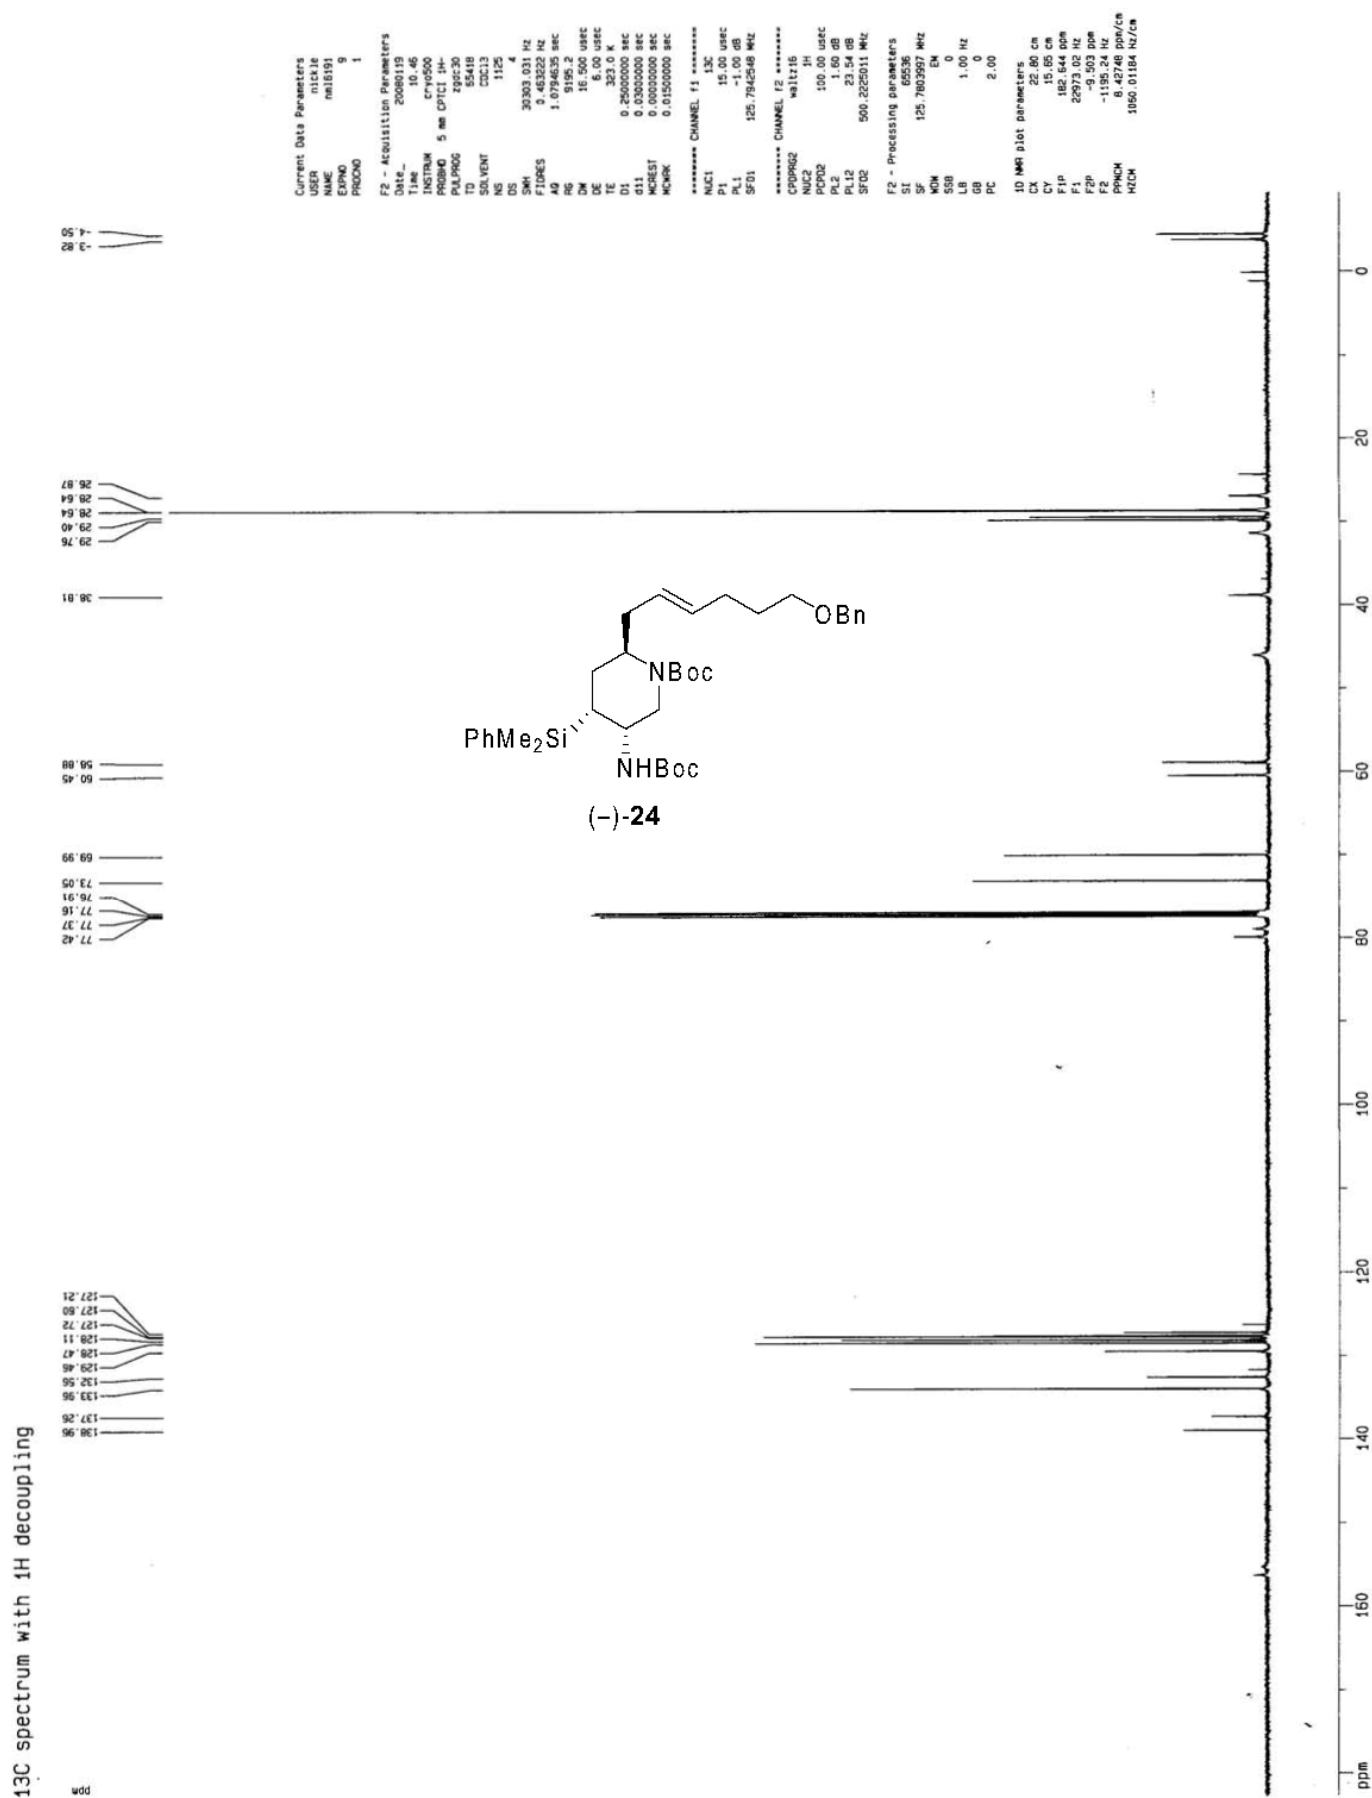

<sup>1</sup>H spectrum

ppm

7.4812  
7.4765  
7.4637  
7.4576  
7.3294  
7.3230  
7.3130

2.7932  
2.4806  
2.4795  
2.4712  
2.4665  
2.4617

1.4032  
1.3922  
1.3731  
1.3675  
1.3596

0.2545  
0.2452  
0.2321  
0.2166  
0.1973  
0.1762  
0.0001

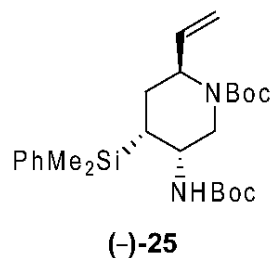

Current Data Parameters  
 USER nickie  
 NAME 20080416  
 EXPNO 4  
 PROCNO 1

F2 - Acquisition Parameters  
 Date\_ 20080416  
 Time 10.47  
 INSTRUM dr400  
 PROBD 5 mm QNP H/F/P  
 PULPROG zgpg30  
 TD 65536  
 SFO1 400.1328009 MHz  
 SOLVENT DMSO-d<sub>6</sub>  
 NS 8  
 DS 2  
 SWH 6410.256 Hz  
 FIDRES 0.097813 Hz  
 AQ 5.1118579 sec  
 RG 456.1  
 DW 78.000 usec  
 DE 4.50 usec  
 TE 300.2 K  
 T1 0.10000000 sec  
 T1RHO 0.00000000 sec  
 NOEST 0.00000000 sec  
 NOVER 0.01500000 sec

===== CHANNEL f1 =====  
 NUC1 1H  
 P1 12.00 usec  
 PL1 0.00 dB  
 SFO1 400.1328009 MHz

F2 - Processing parameters  
 SI 65536  
 SF 400.1300185 MHz  
 WDW EM  
 SSB 0  
 LB 0.30 Hz  
 GB 0  
 PC 2.00

1D NMR plot parameters  
 CX 22.80 cm  
 CY 15.00 cm  
 F1 7.932 ppm  
 F2 3173.85 Hz  
 F2P -0.262 ppm  
 F2 -104.68 Hz  
 FWHM 0.35927 ppm/cm  
 HZCM 143.79509 Hz/cm

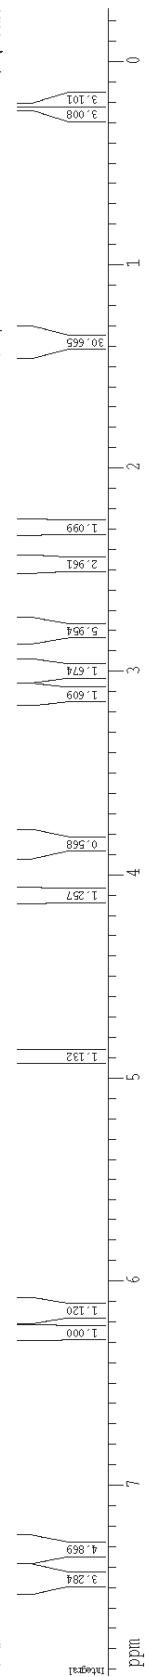

## 13C spectrum with 1H decoupling

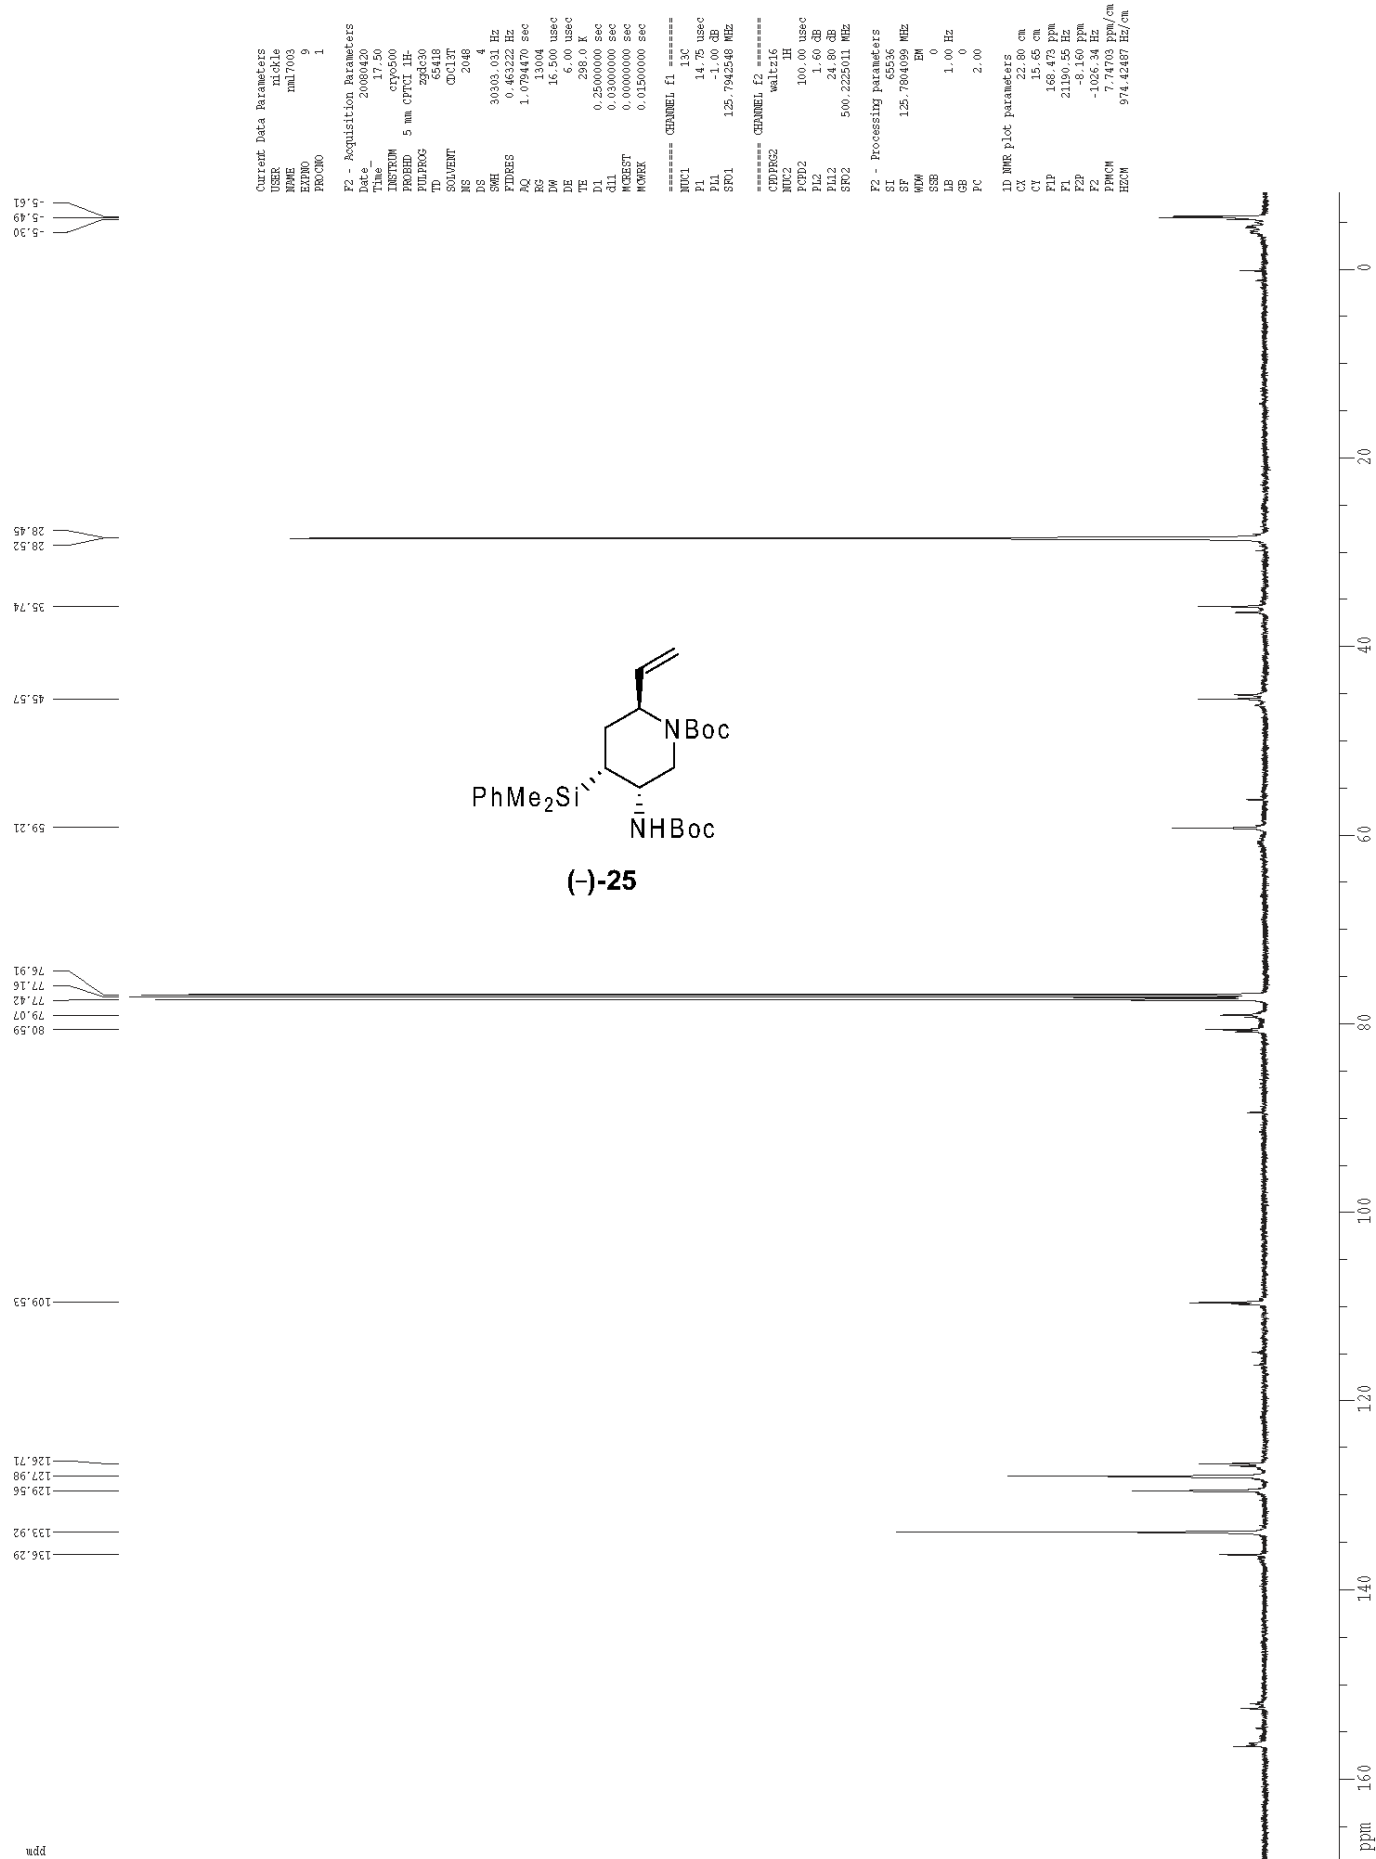



<sup>13</sup>C spectrum with <sup>1</sup>H decoupling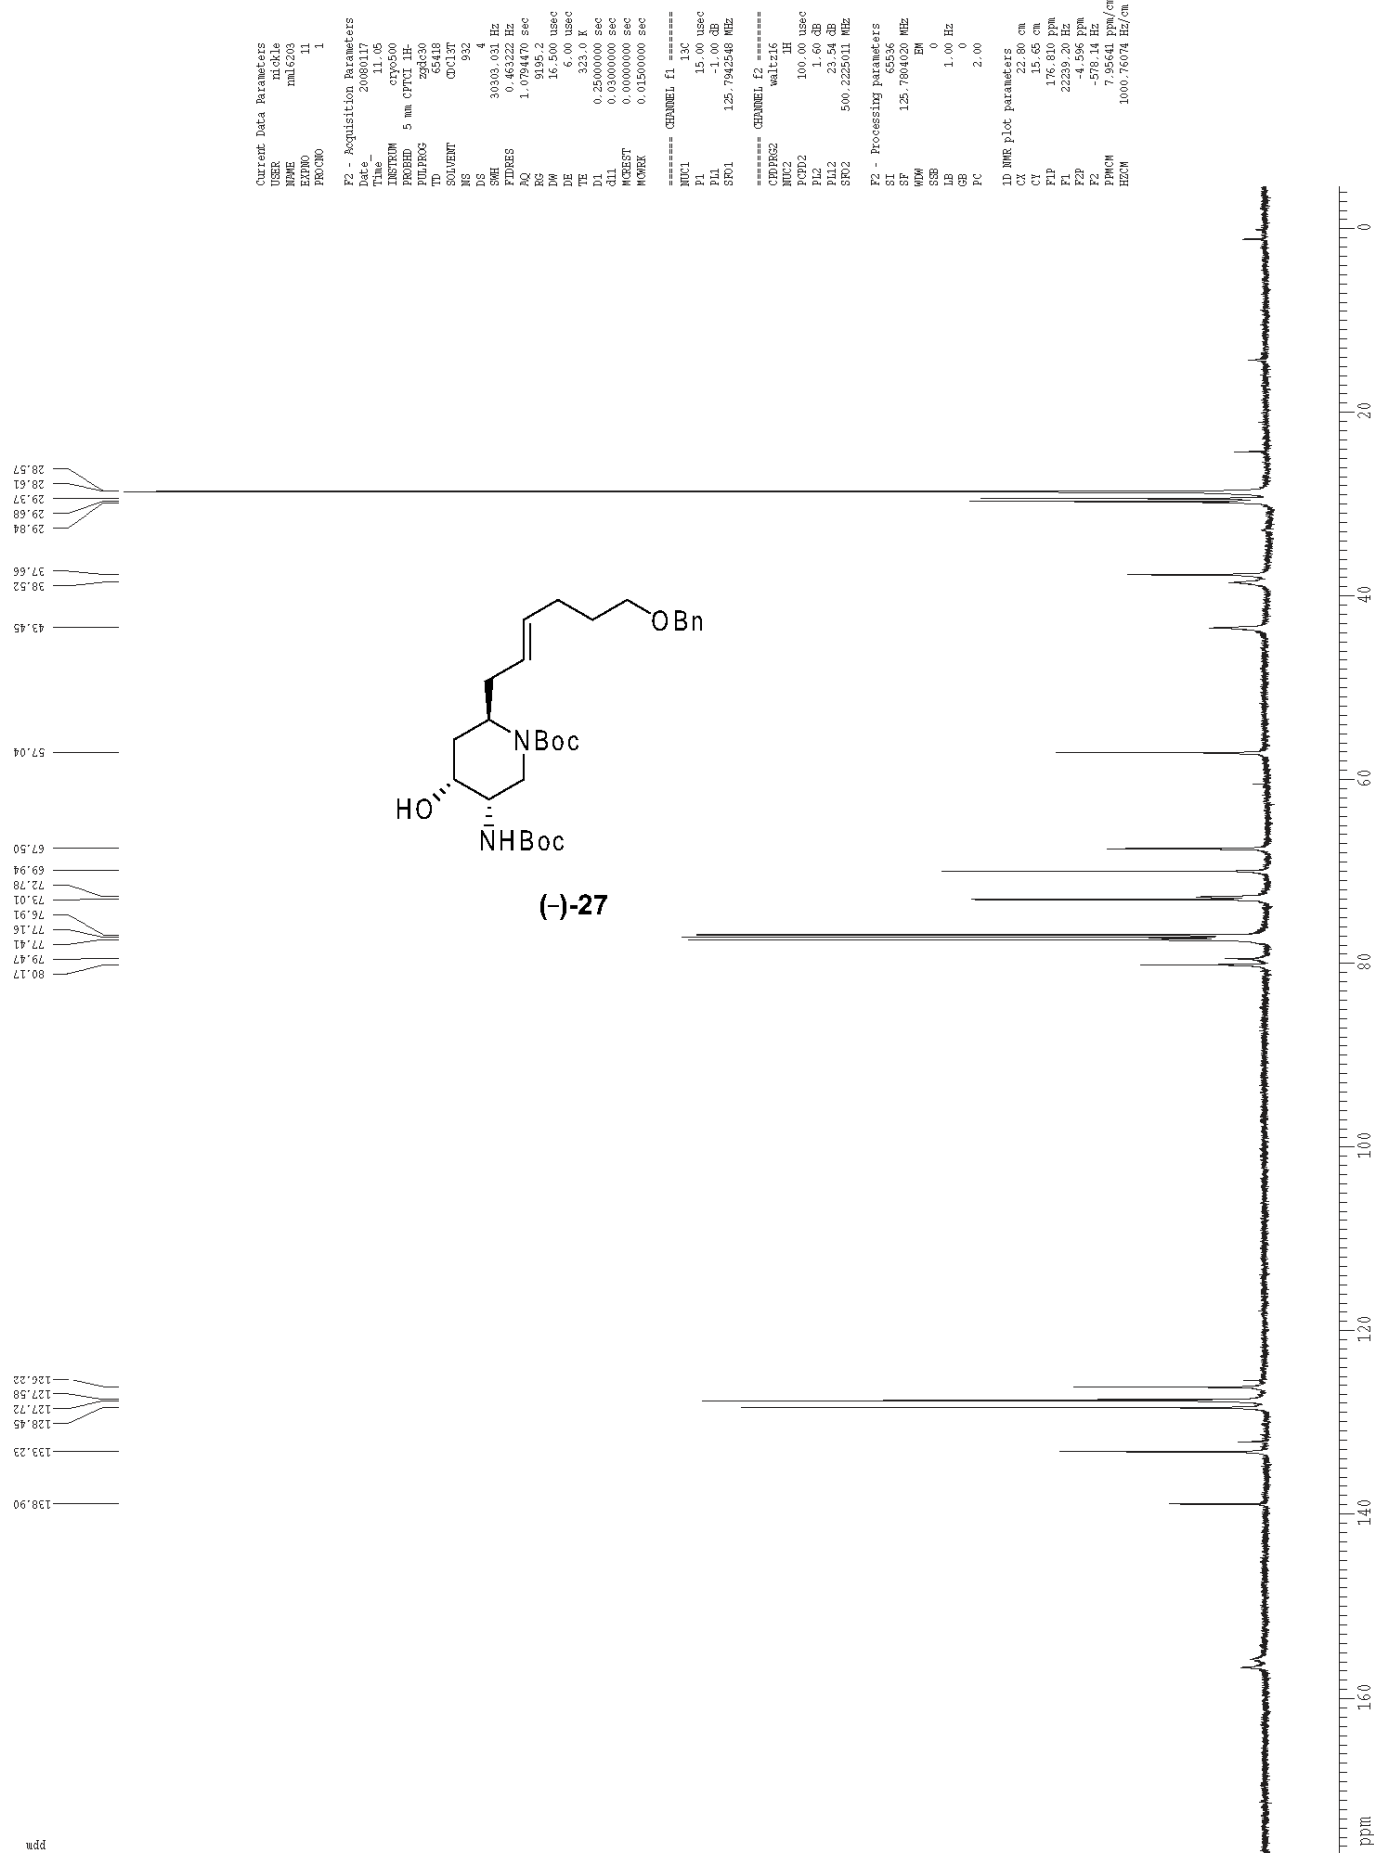



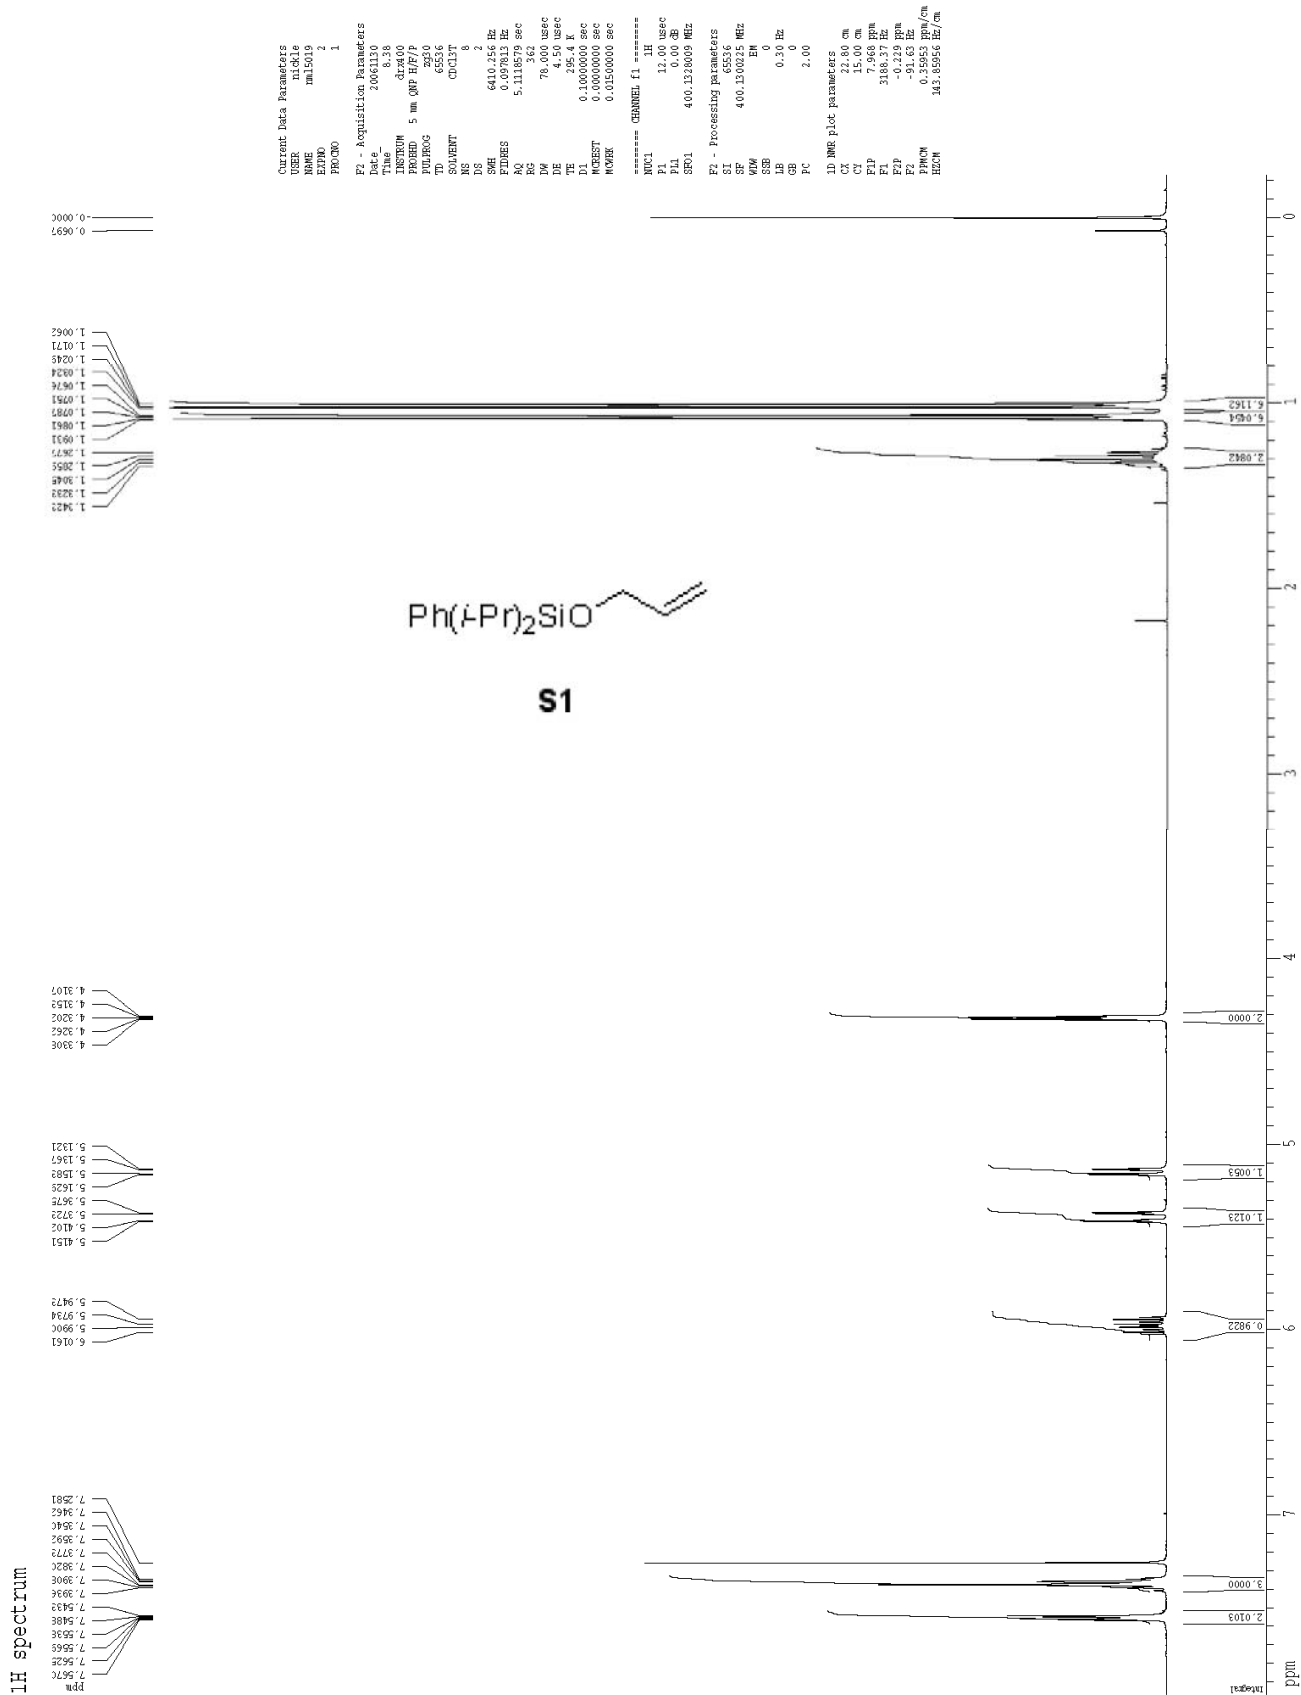

<sup>13</sup>C spectrum with <sup>1</sup>H decoupling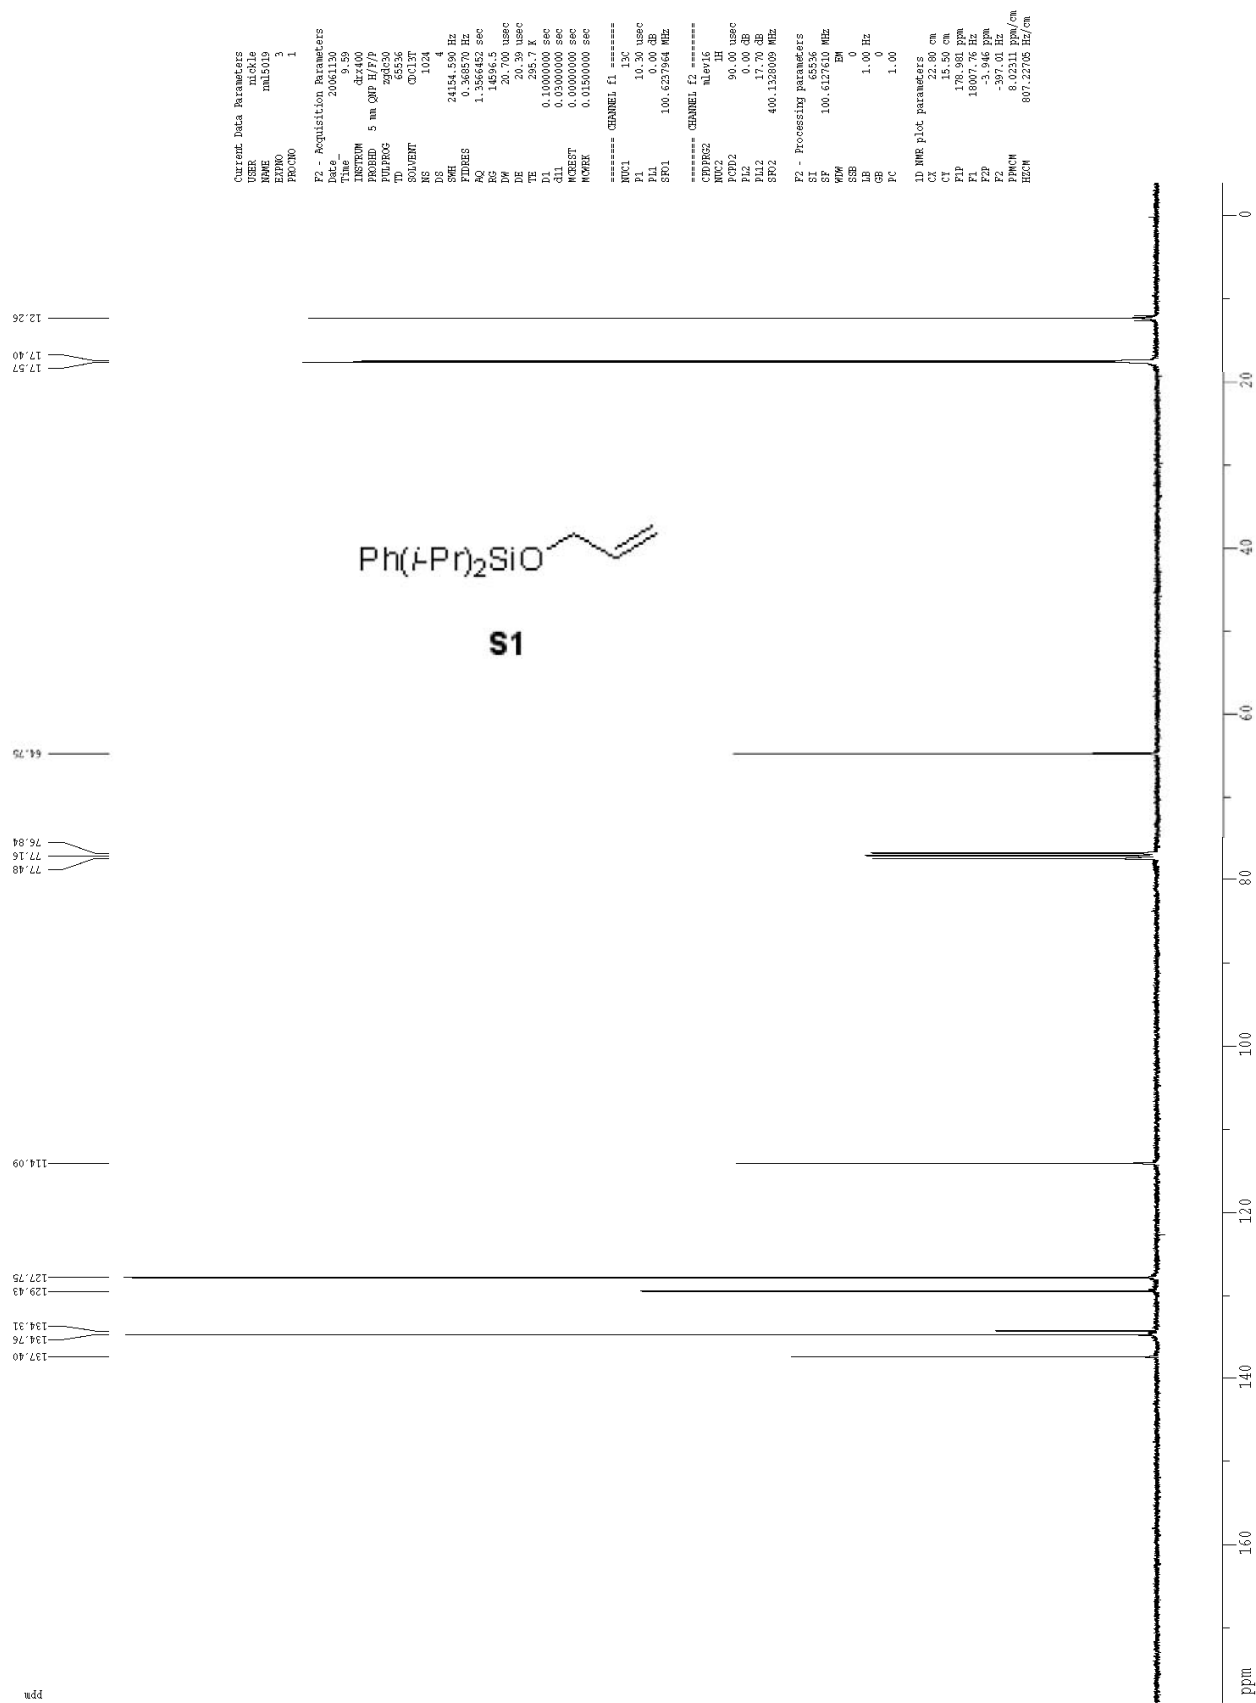

<sup>1</sup>H spectrum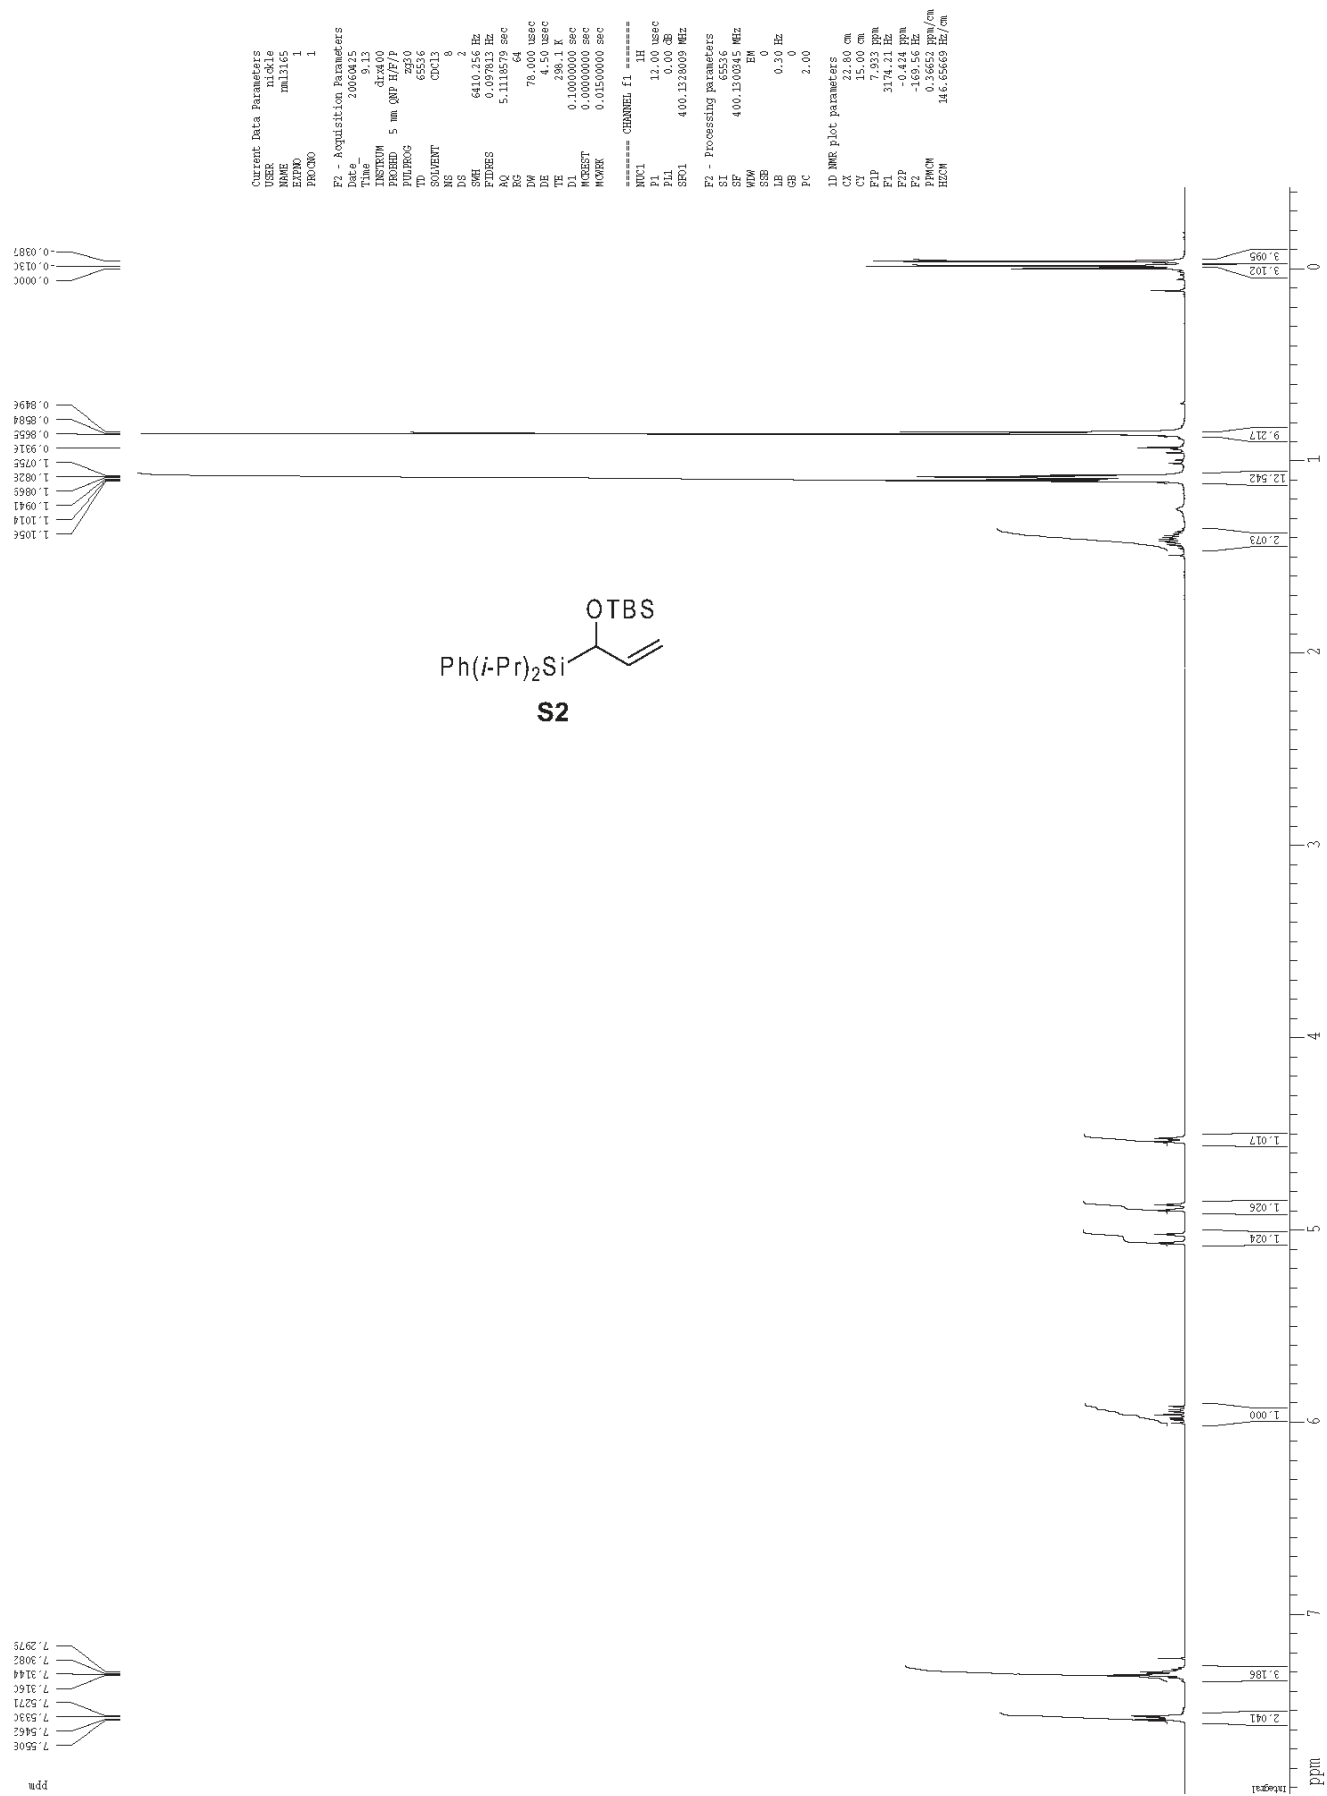

Note: Compound **S7** is an intermediate in the formation of azide **3** (Scheme 1.)

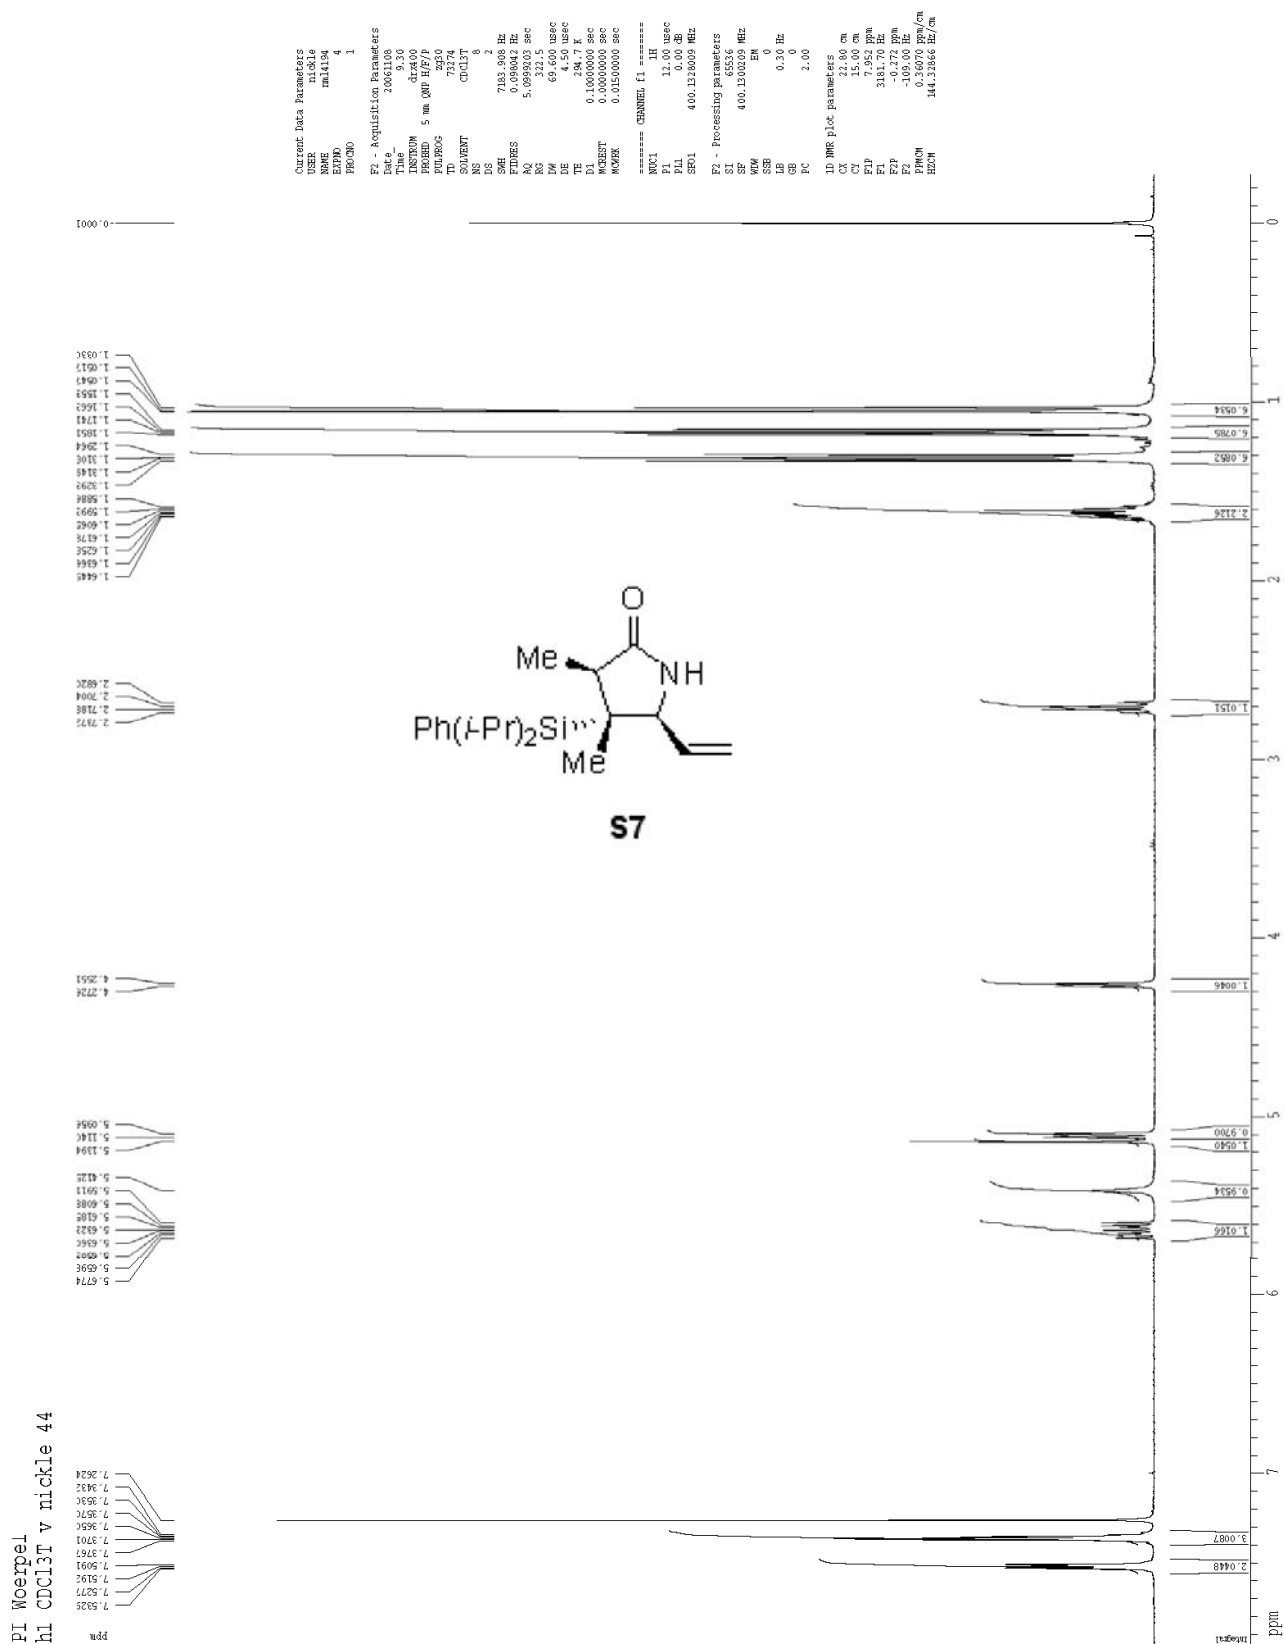

PI Woerpel  
cl3 CDC13T v nickle 16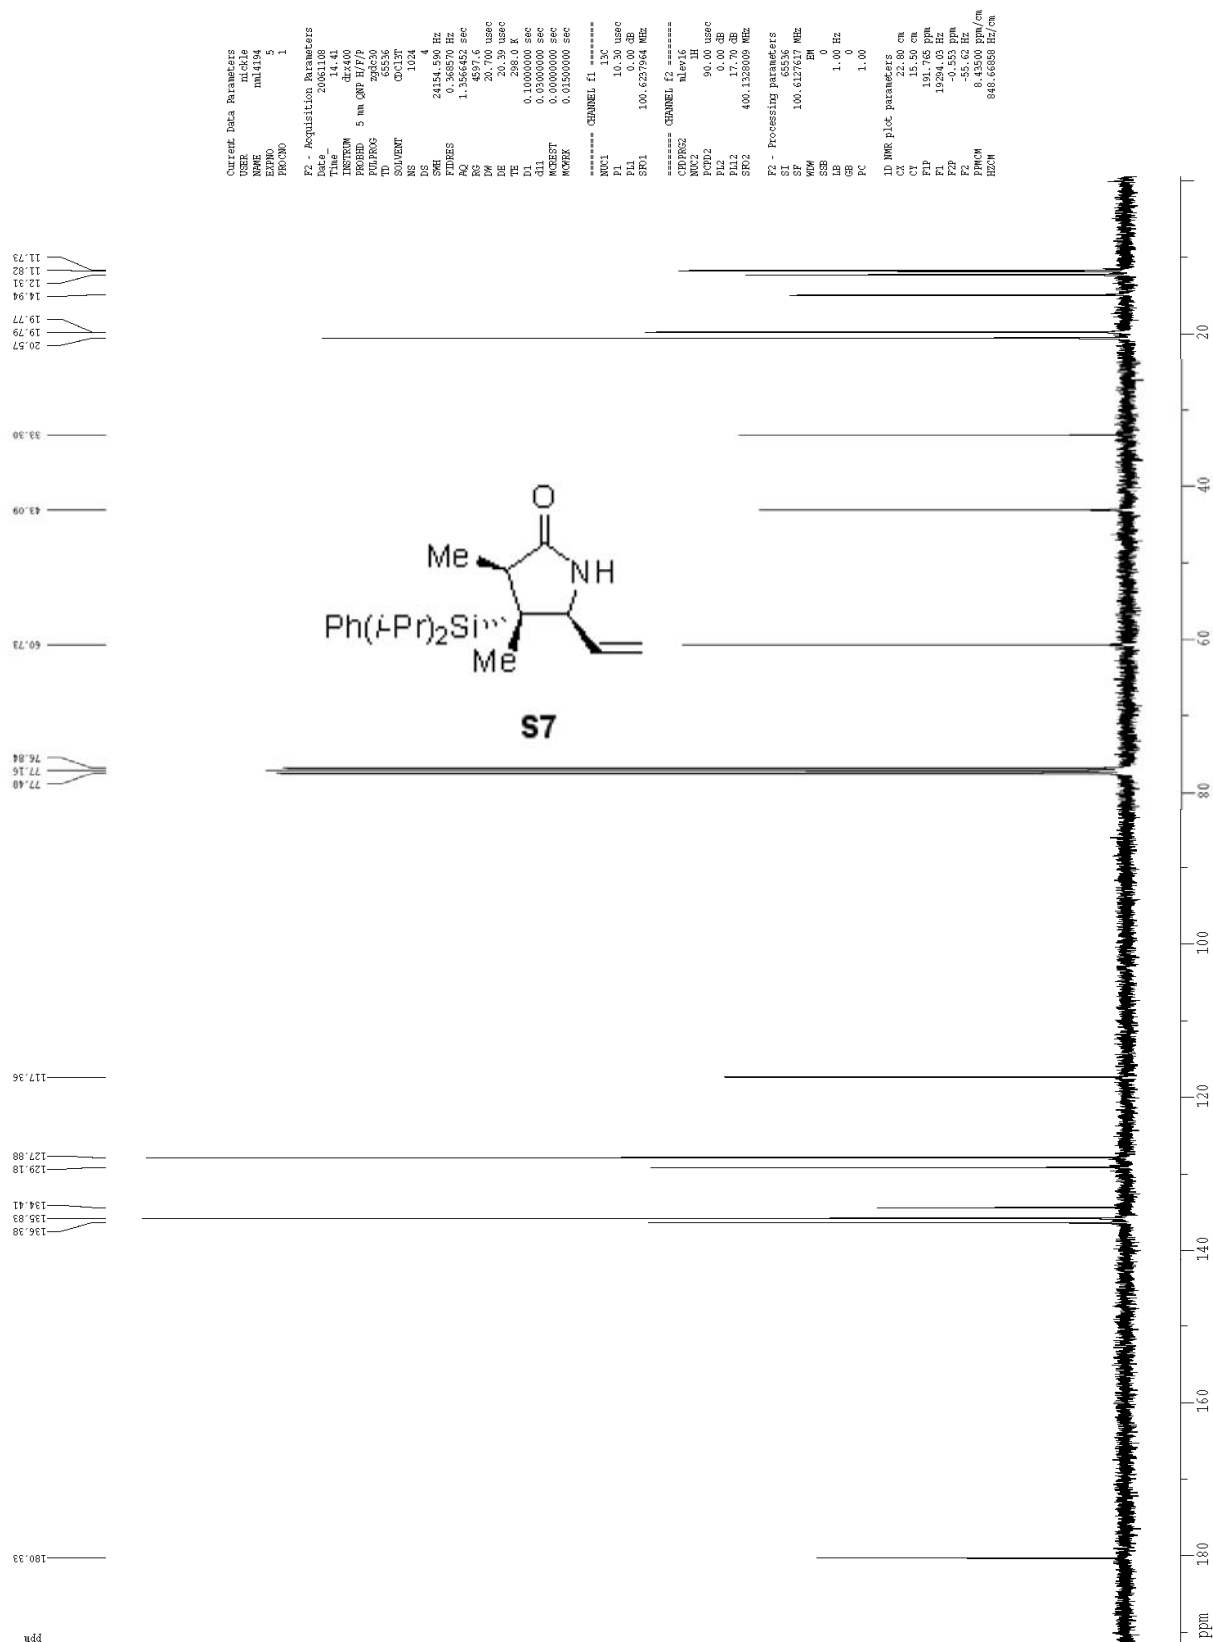

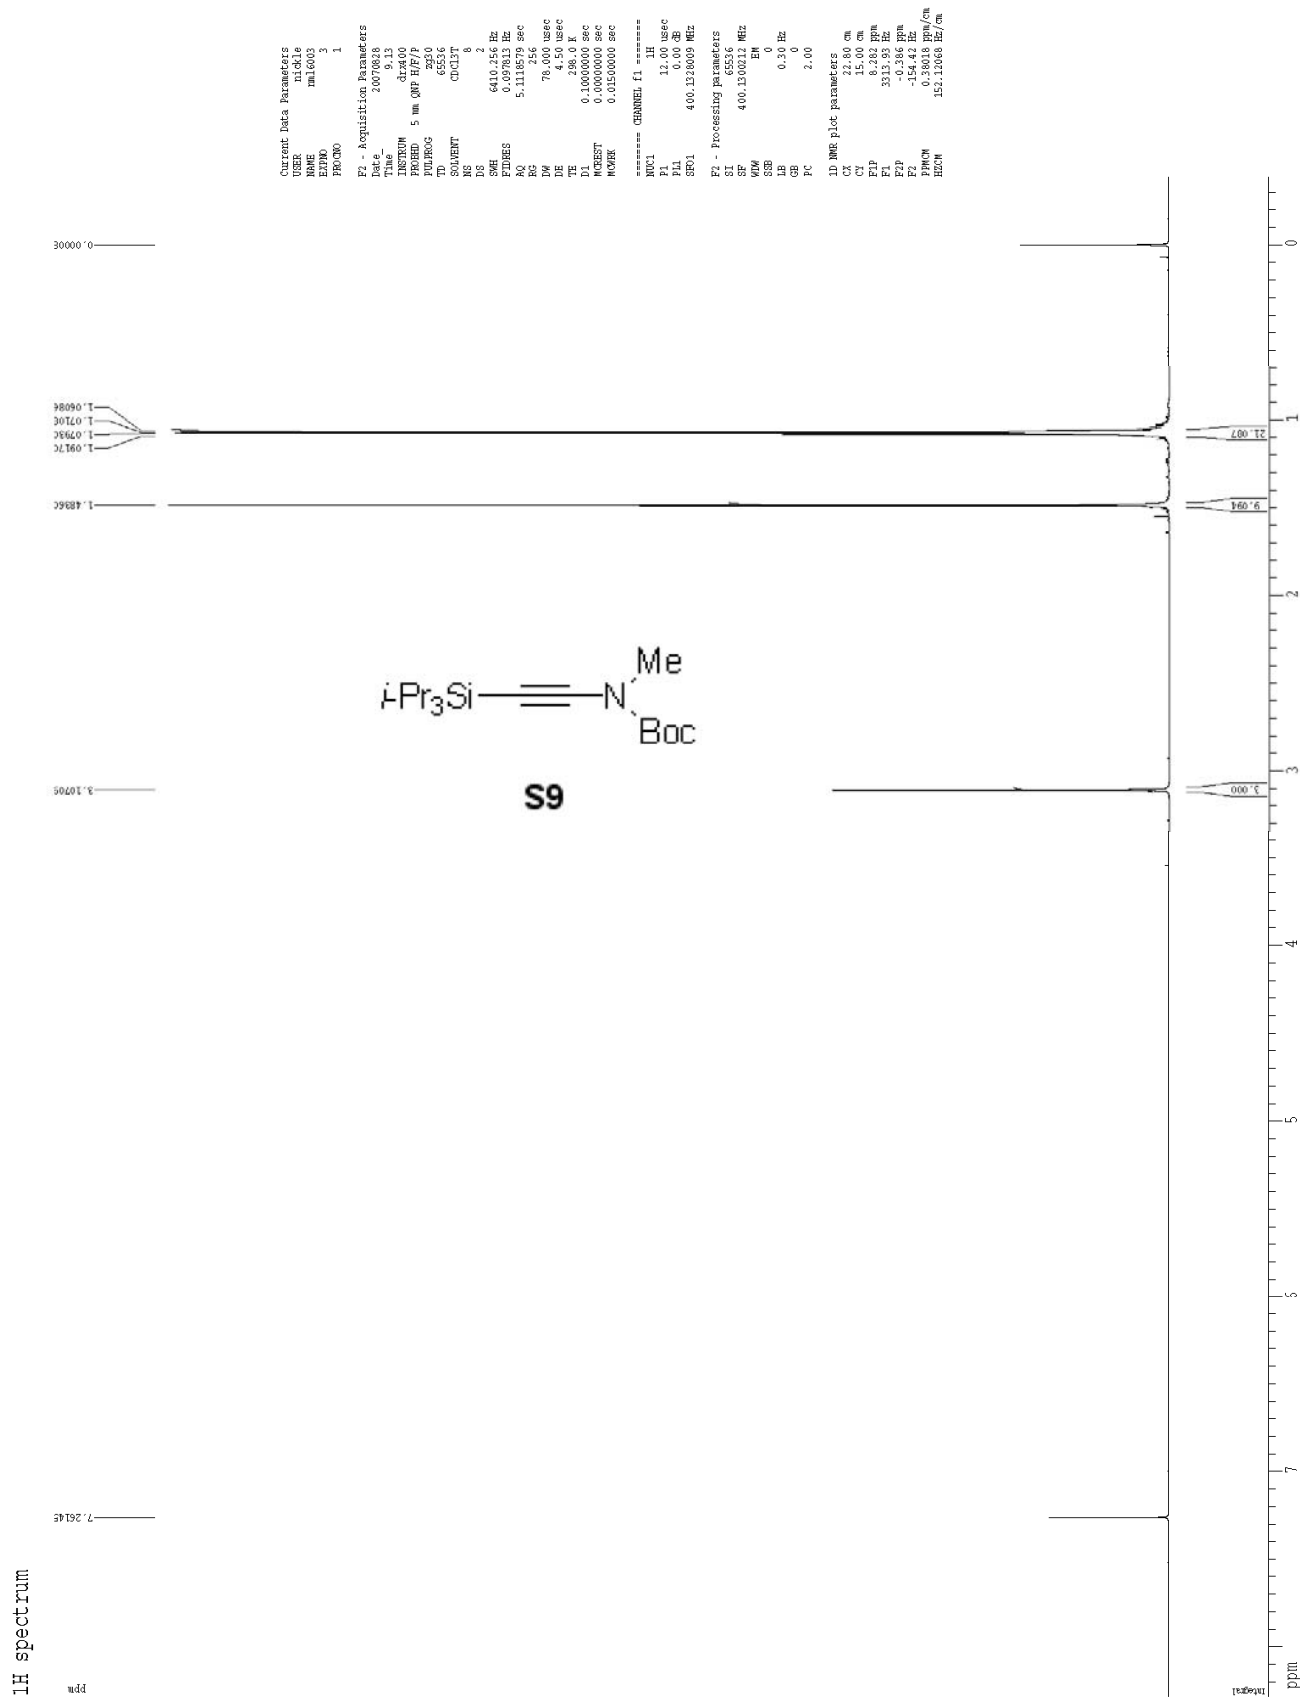

## 13C spectrum with 1H decoupling

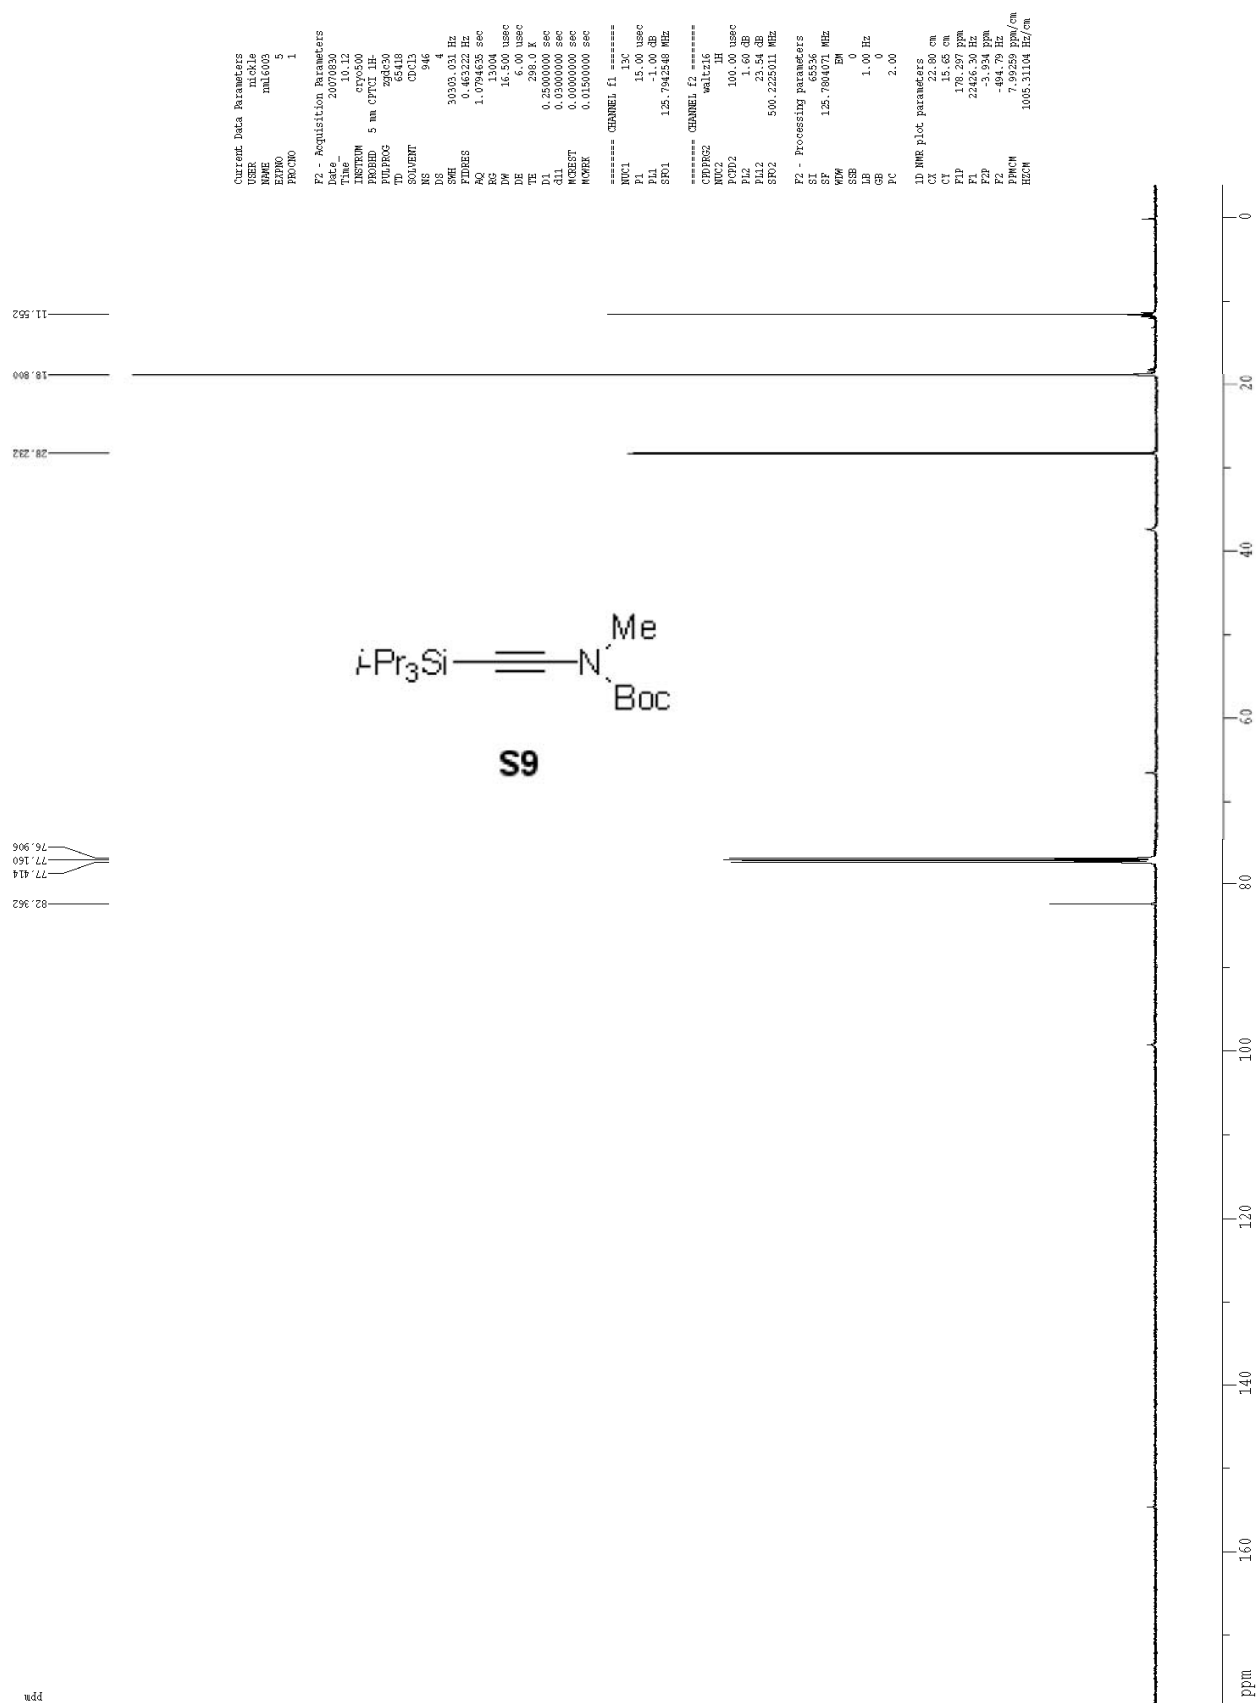

<sup>1</sup>H spectrum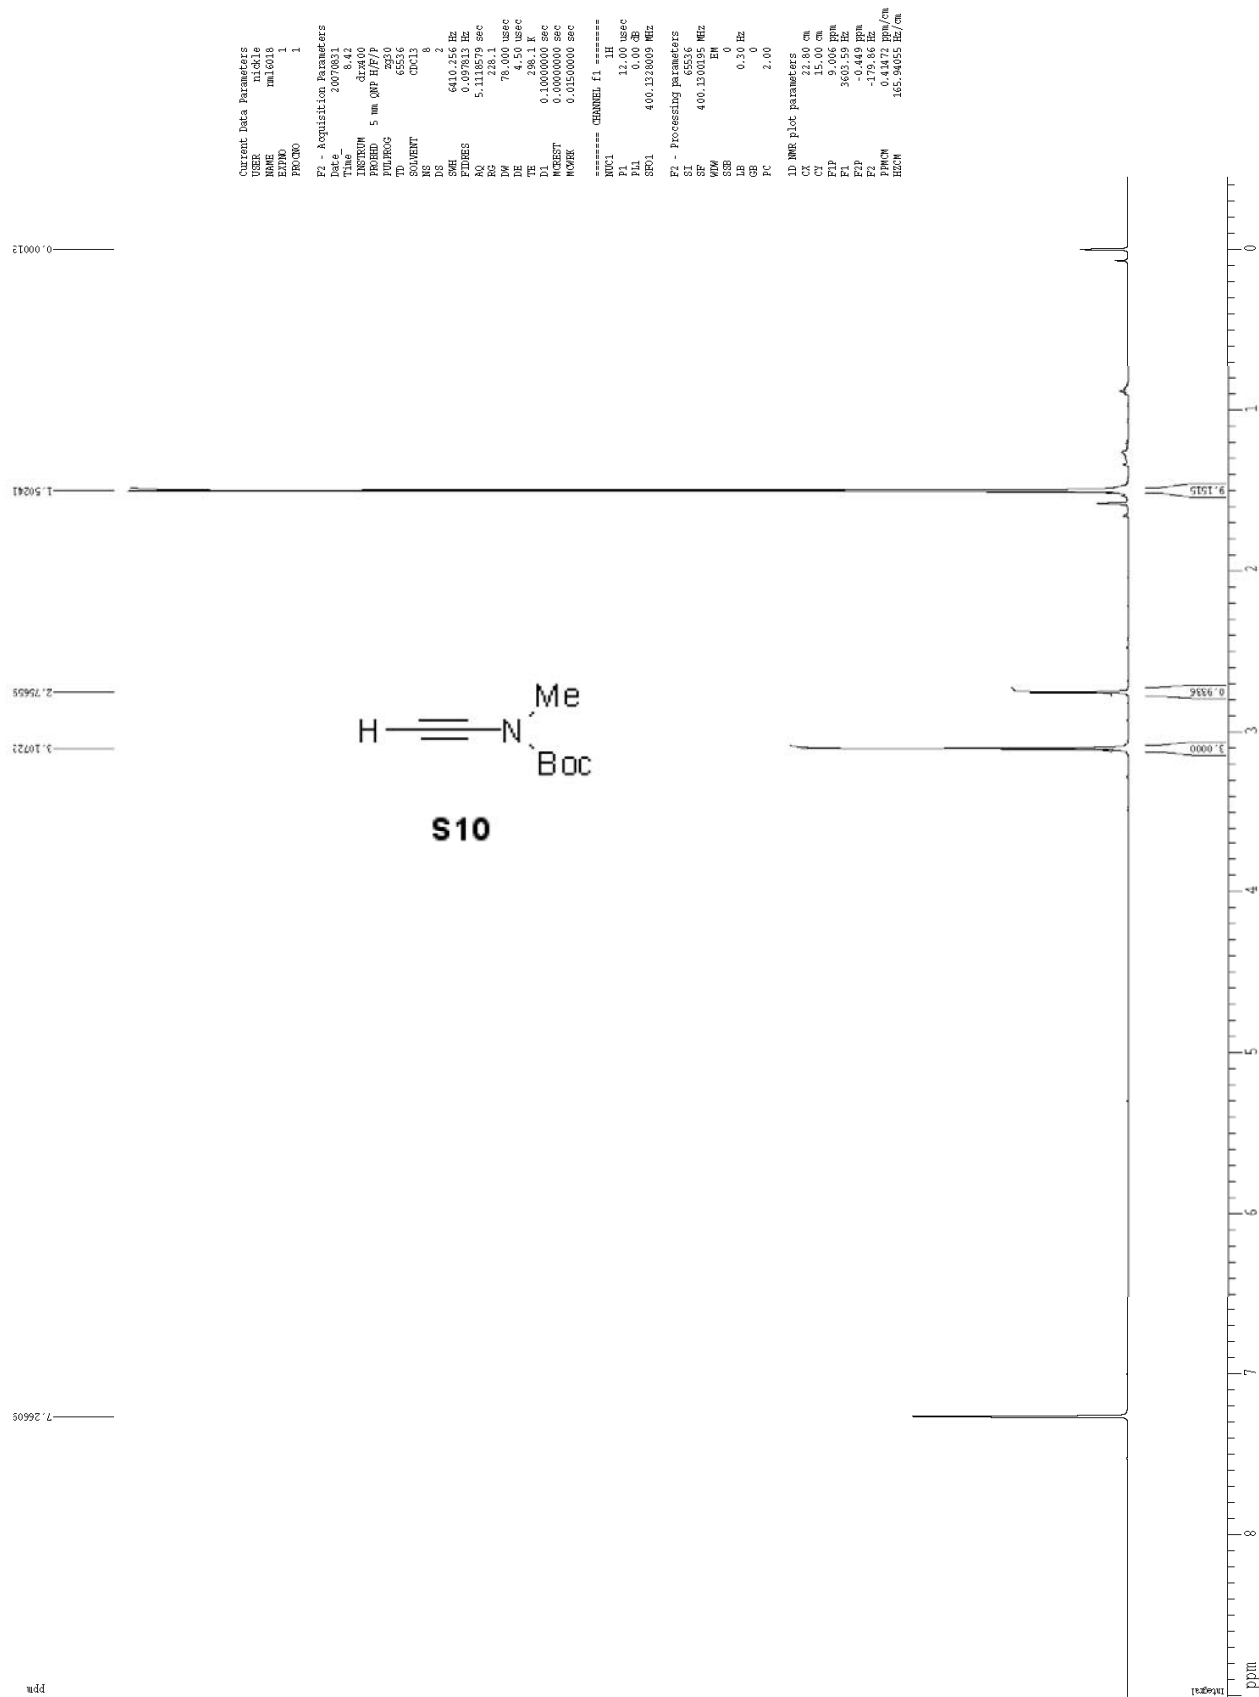



<sup>13</sup>C spectrum with <sup>1</sup>H decoupling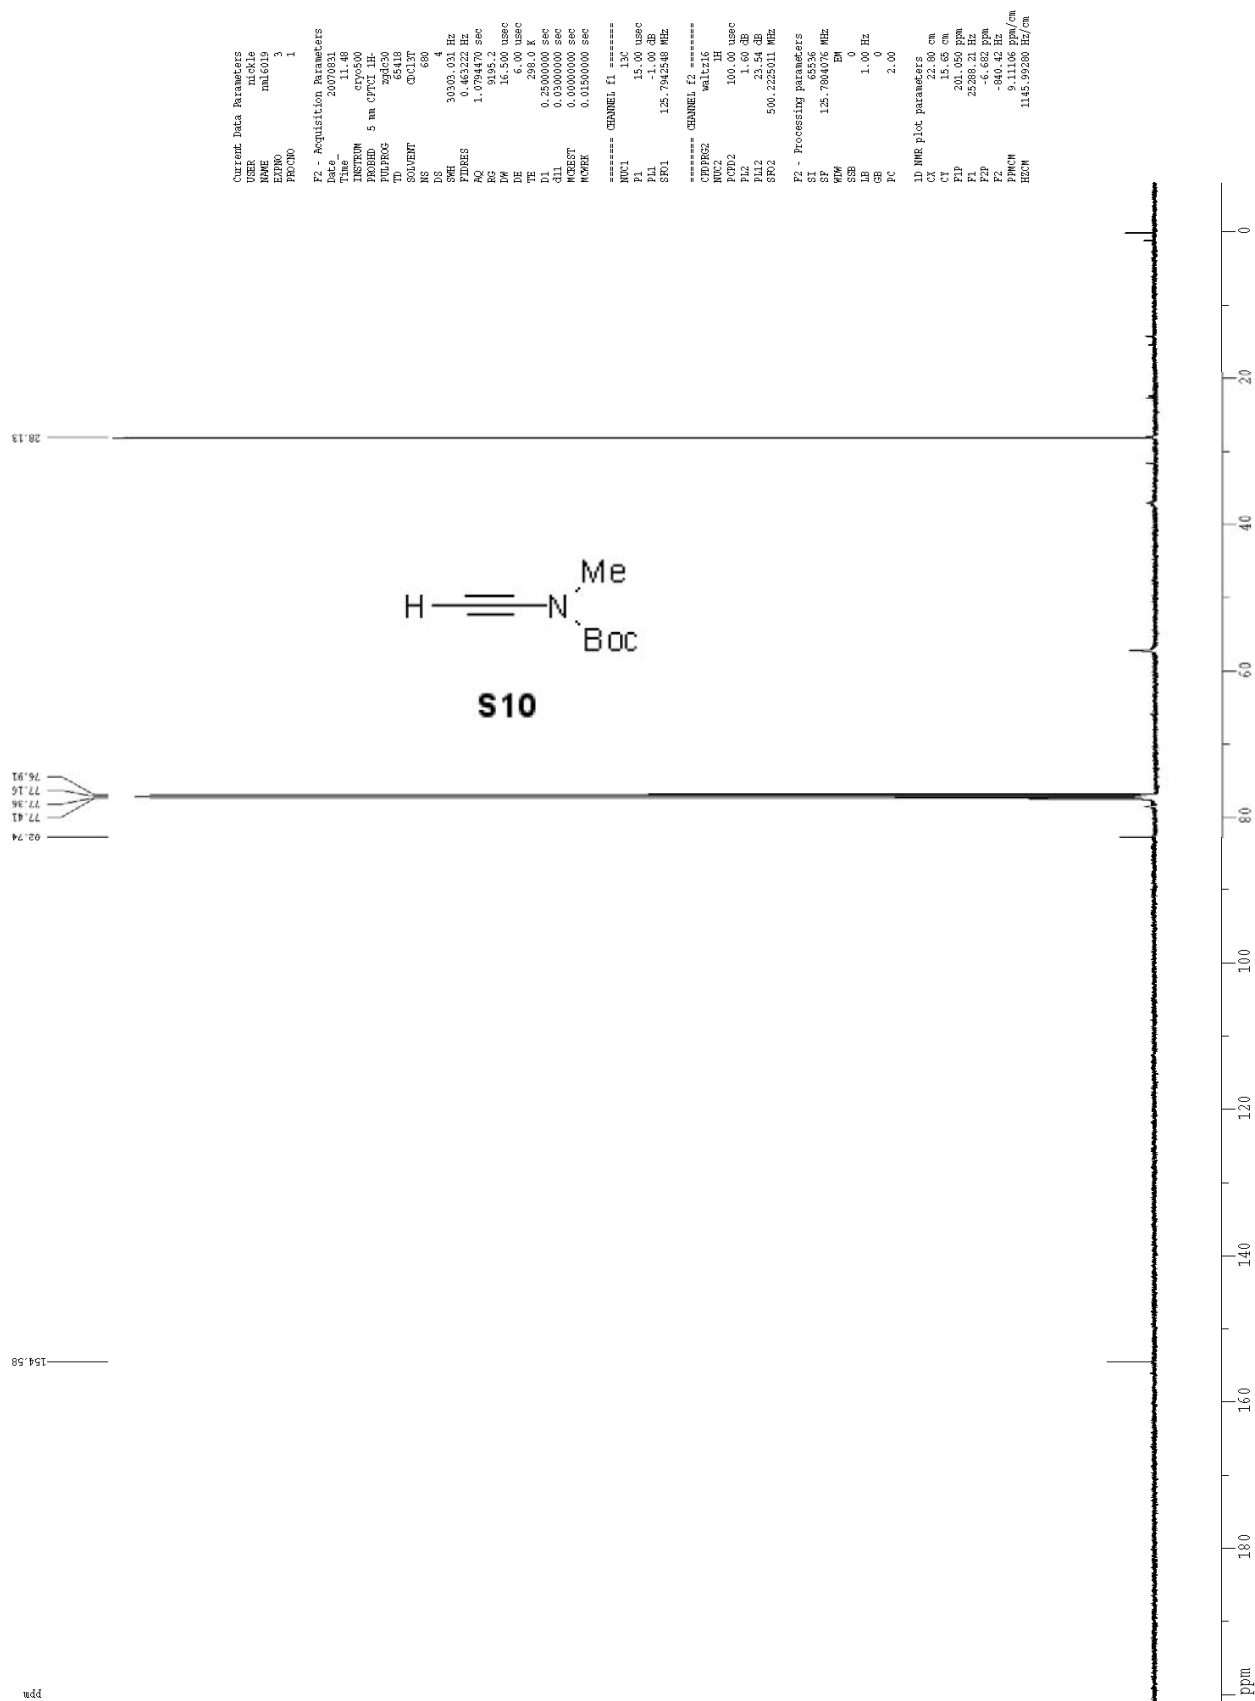

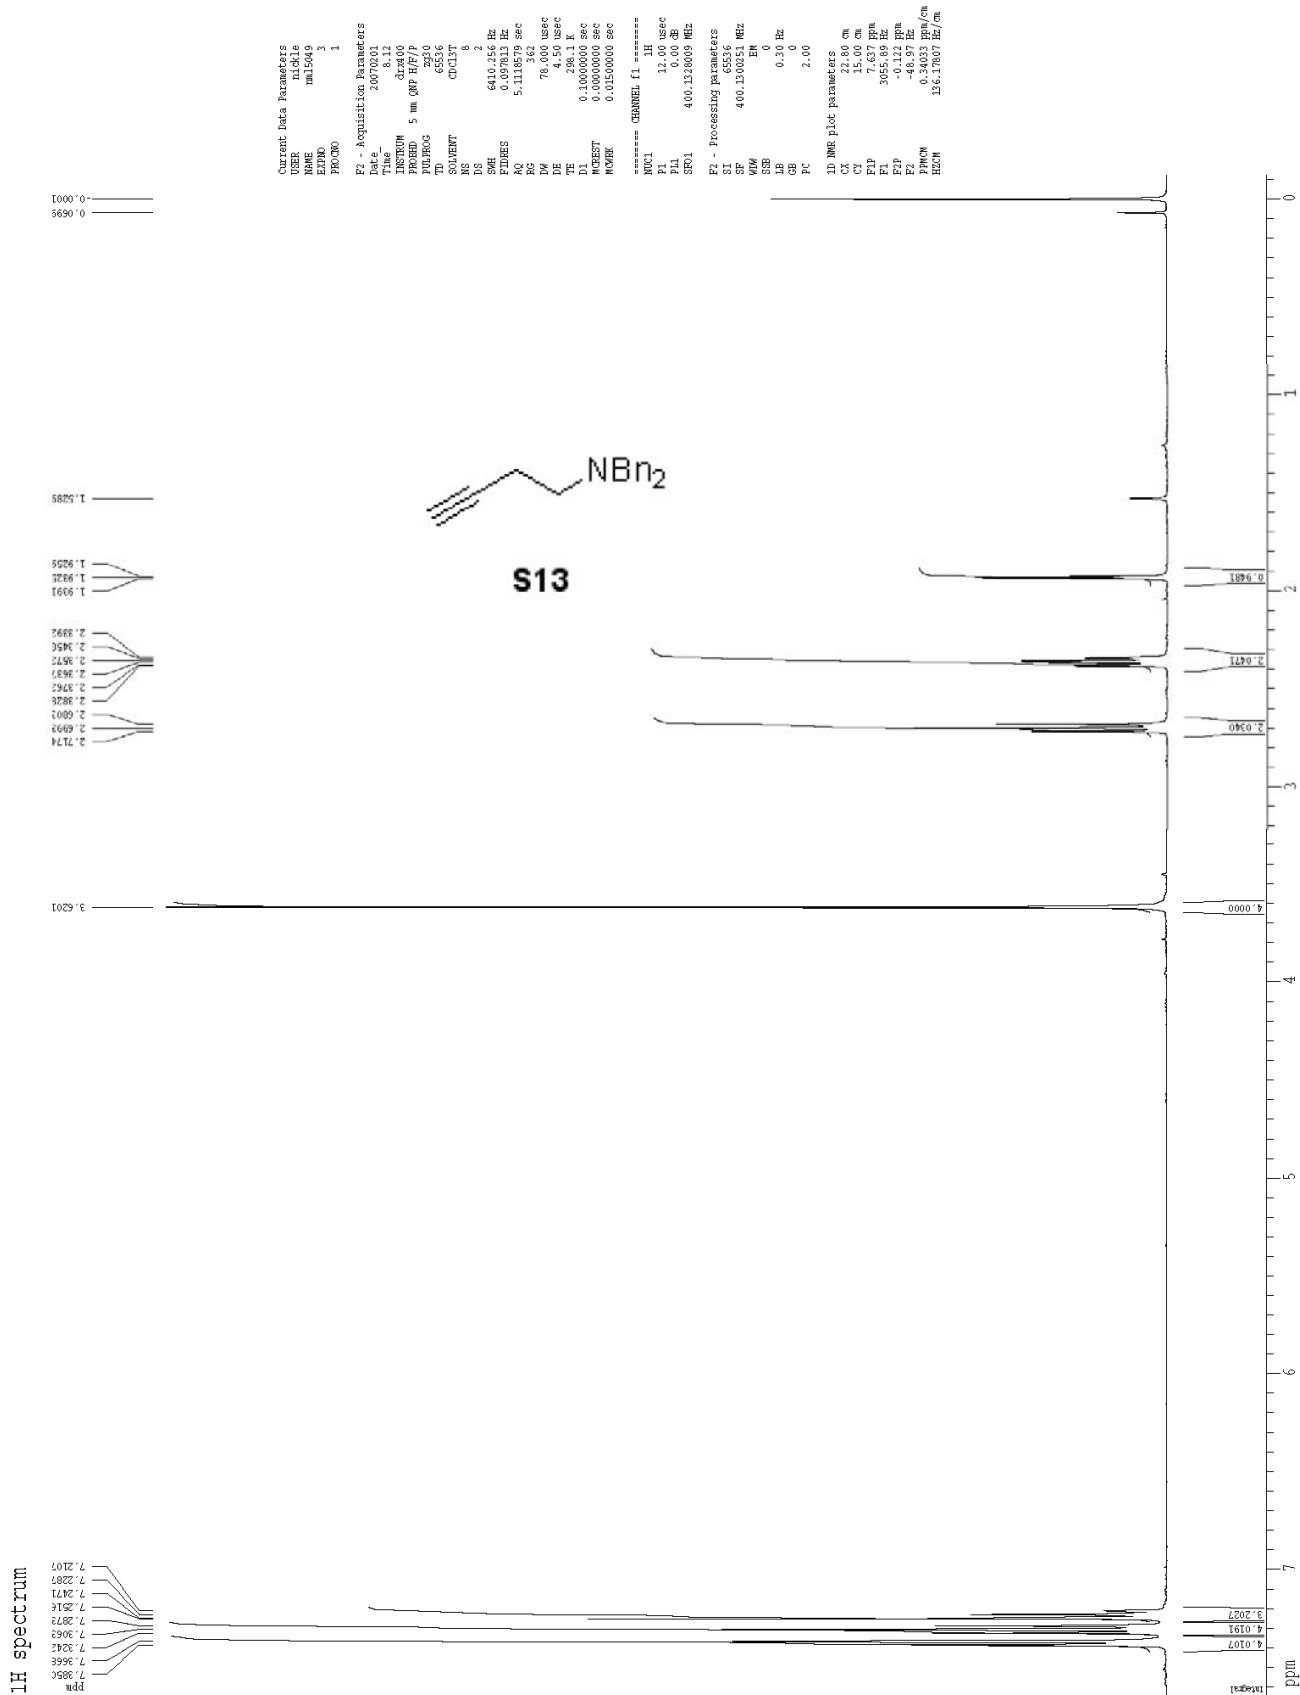

<sup>13</sup>C spectrum with <sup>1</sup>H decoupling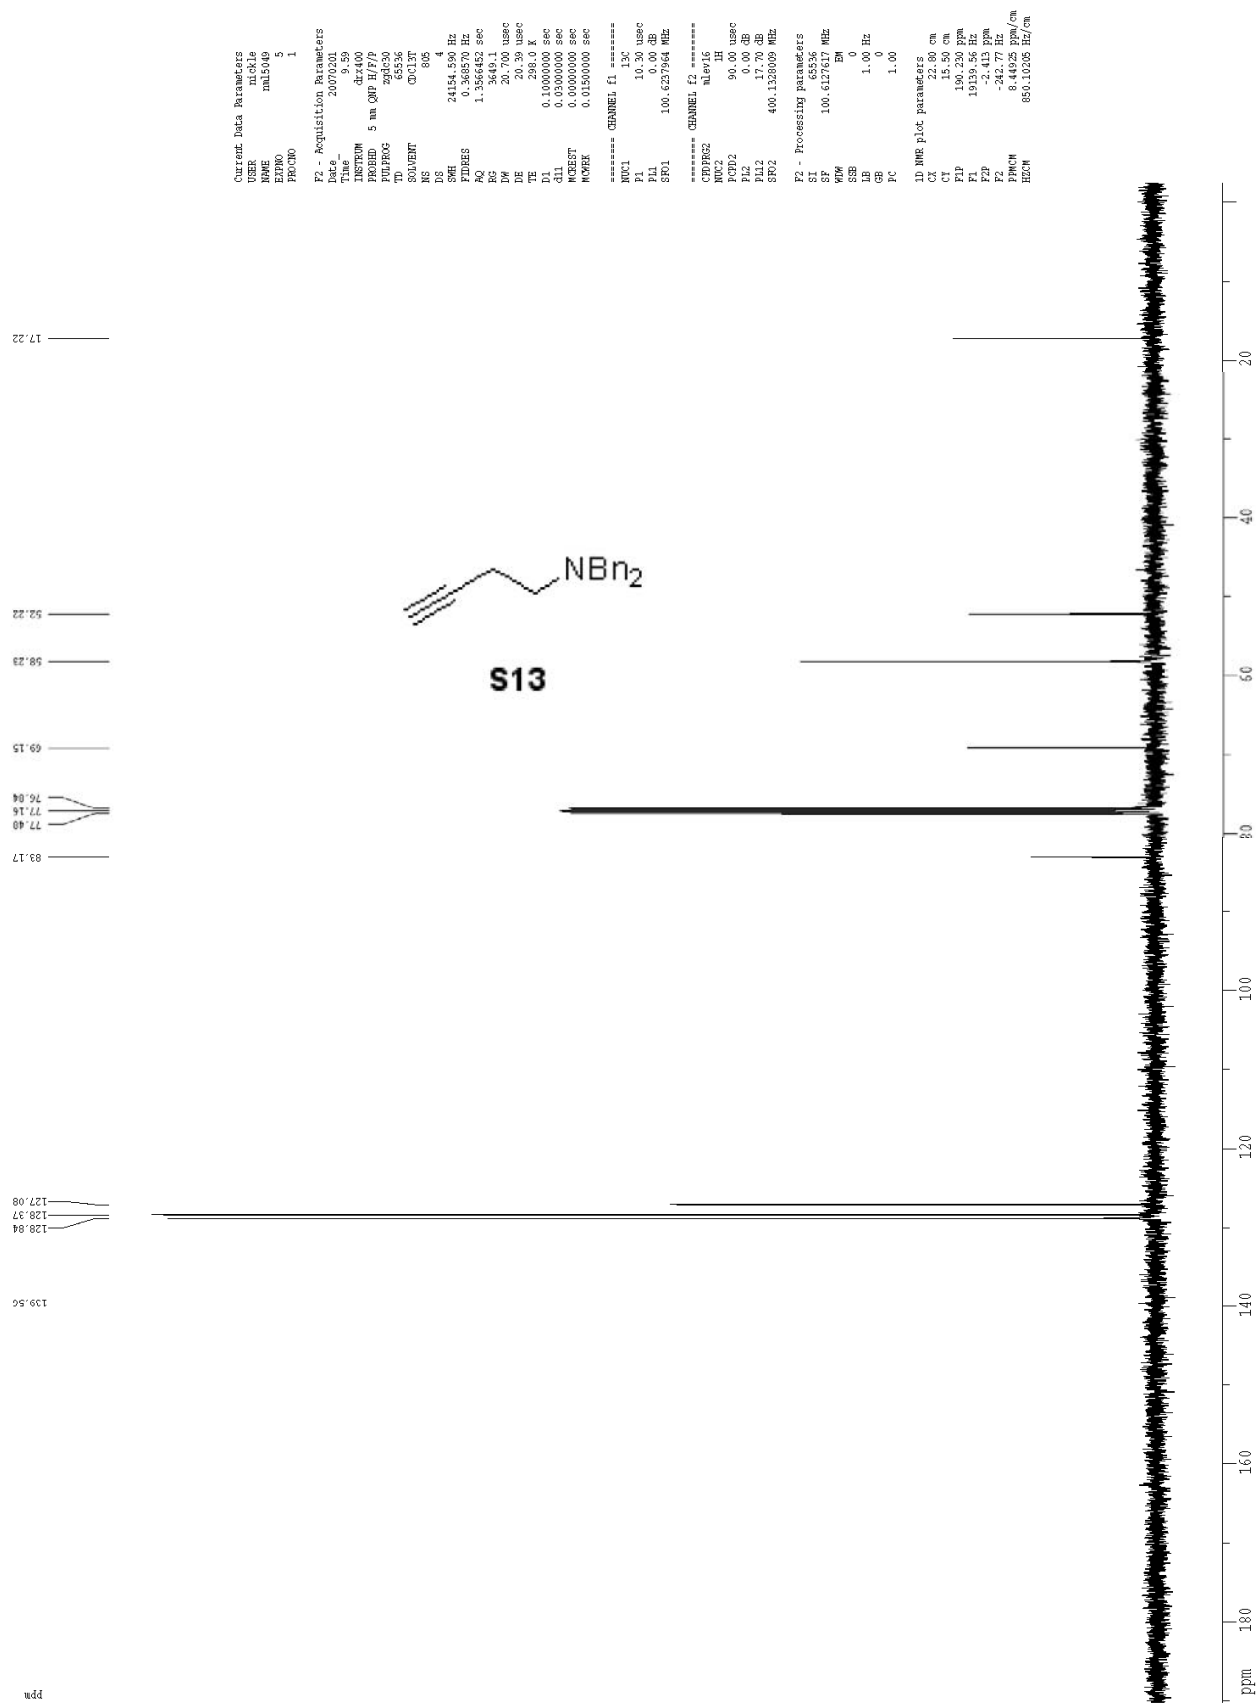

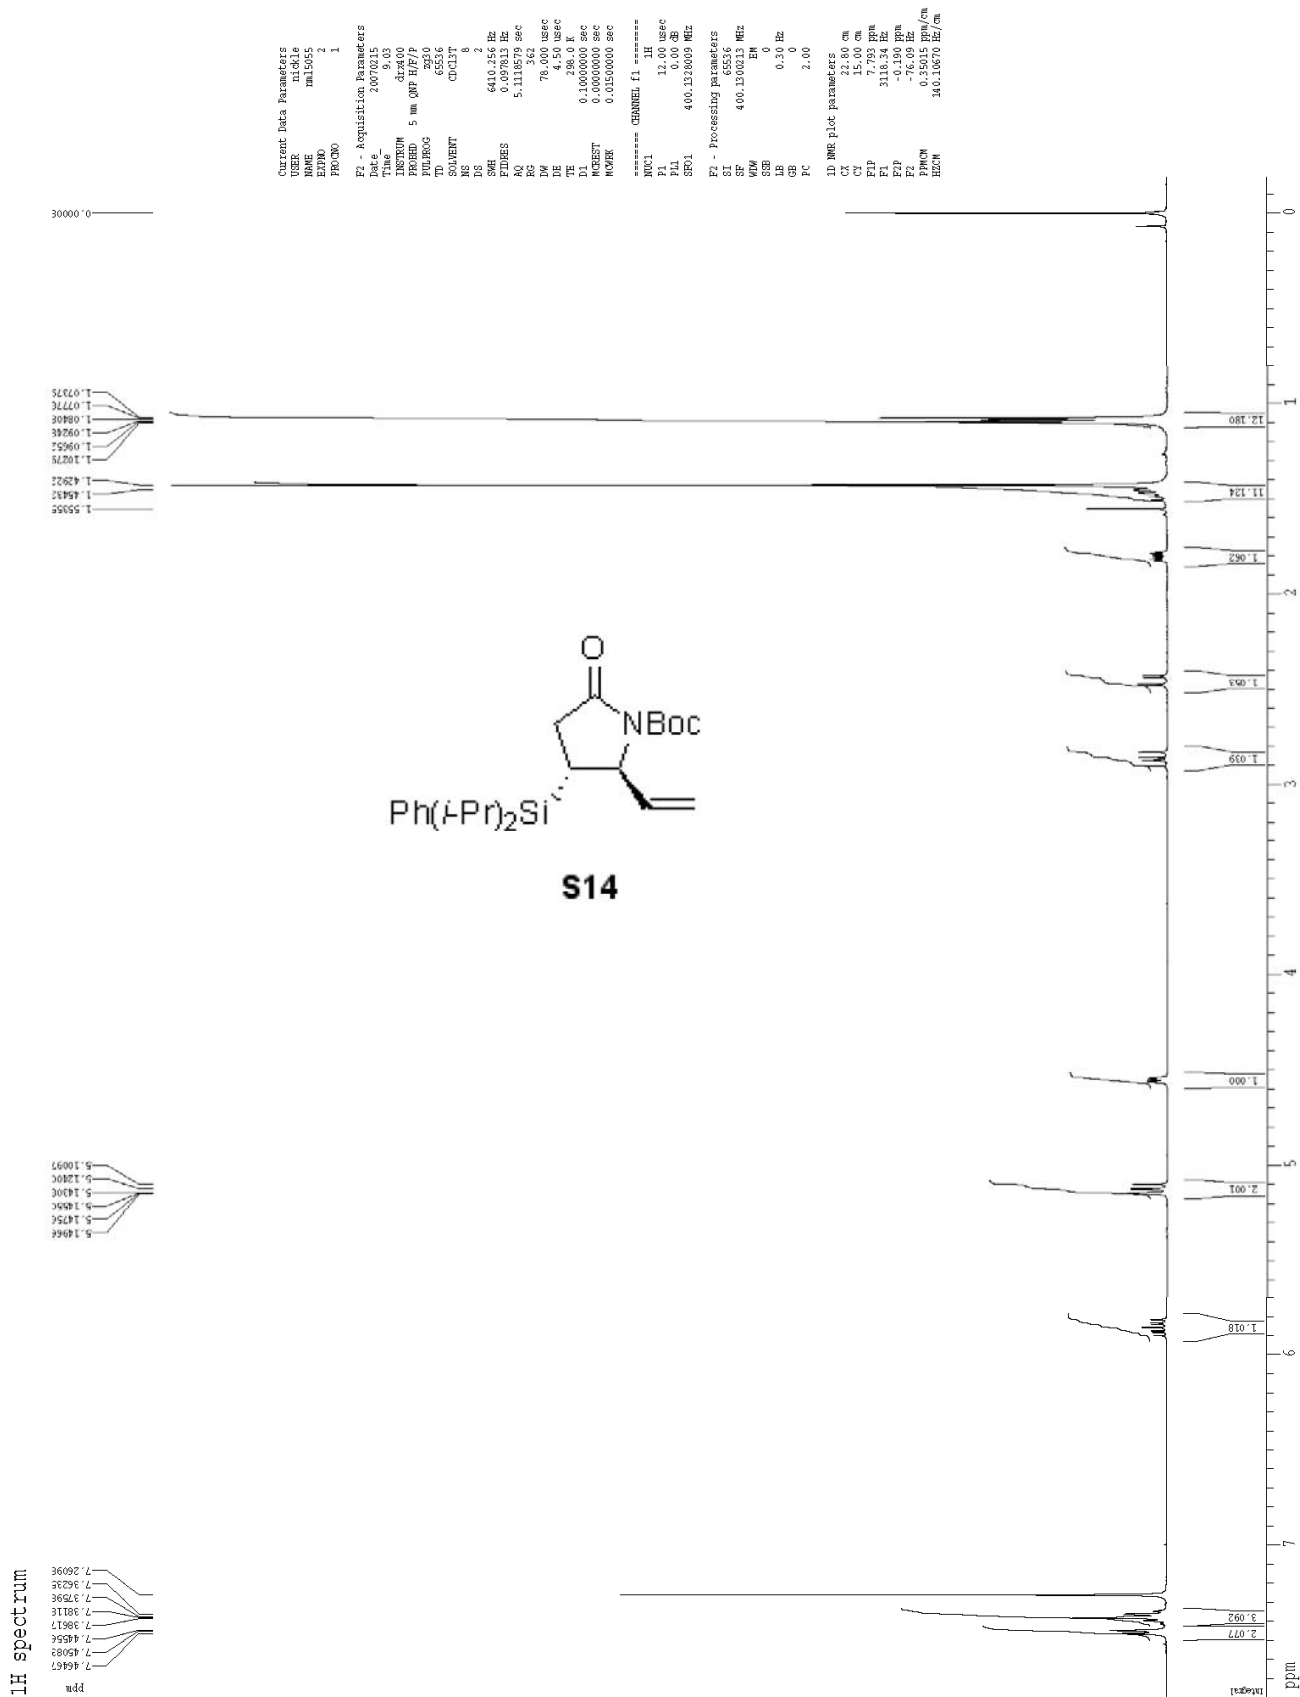

<sup>13</sup>C spectrum with <sup>1</sup>H decoupling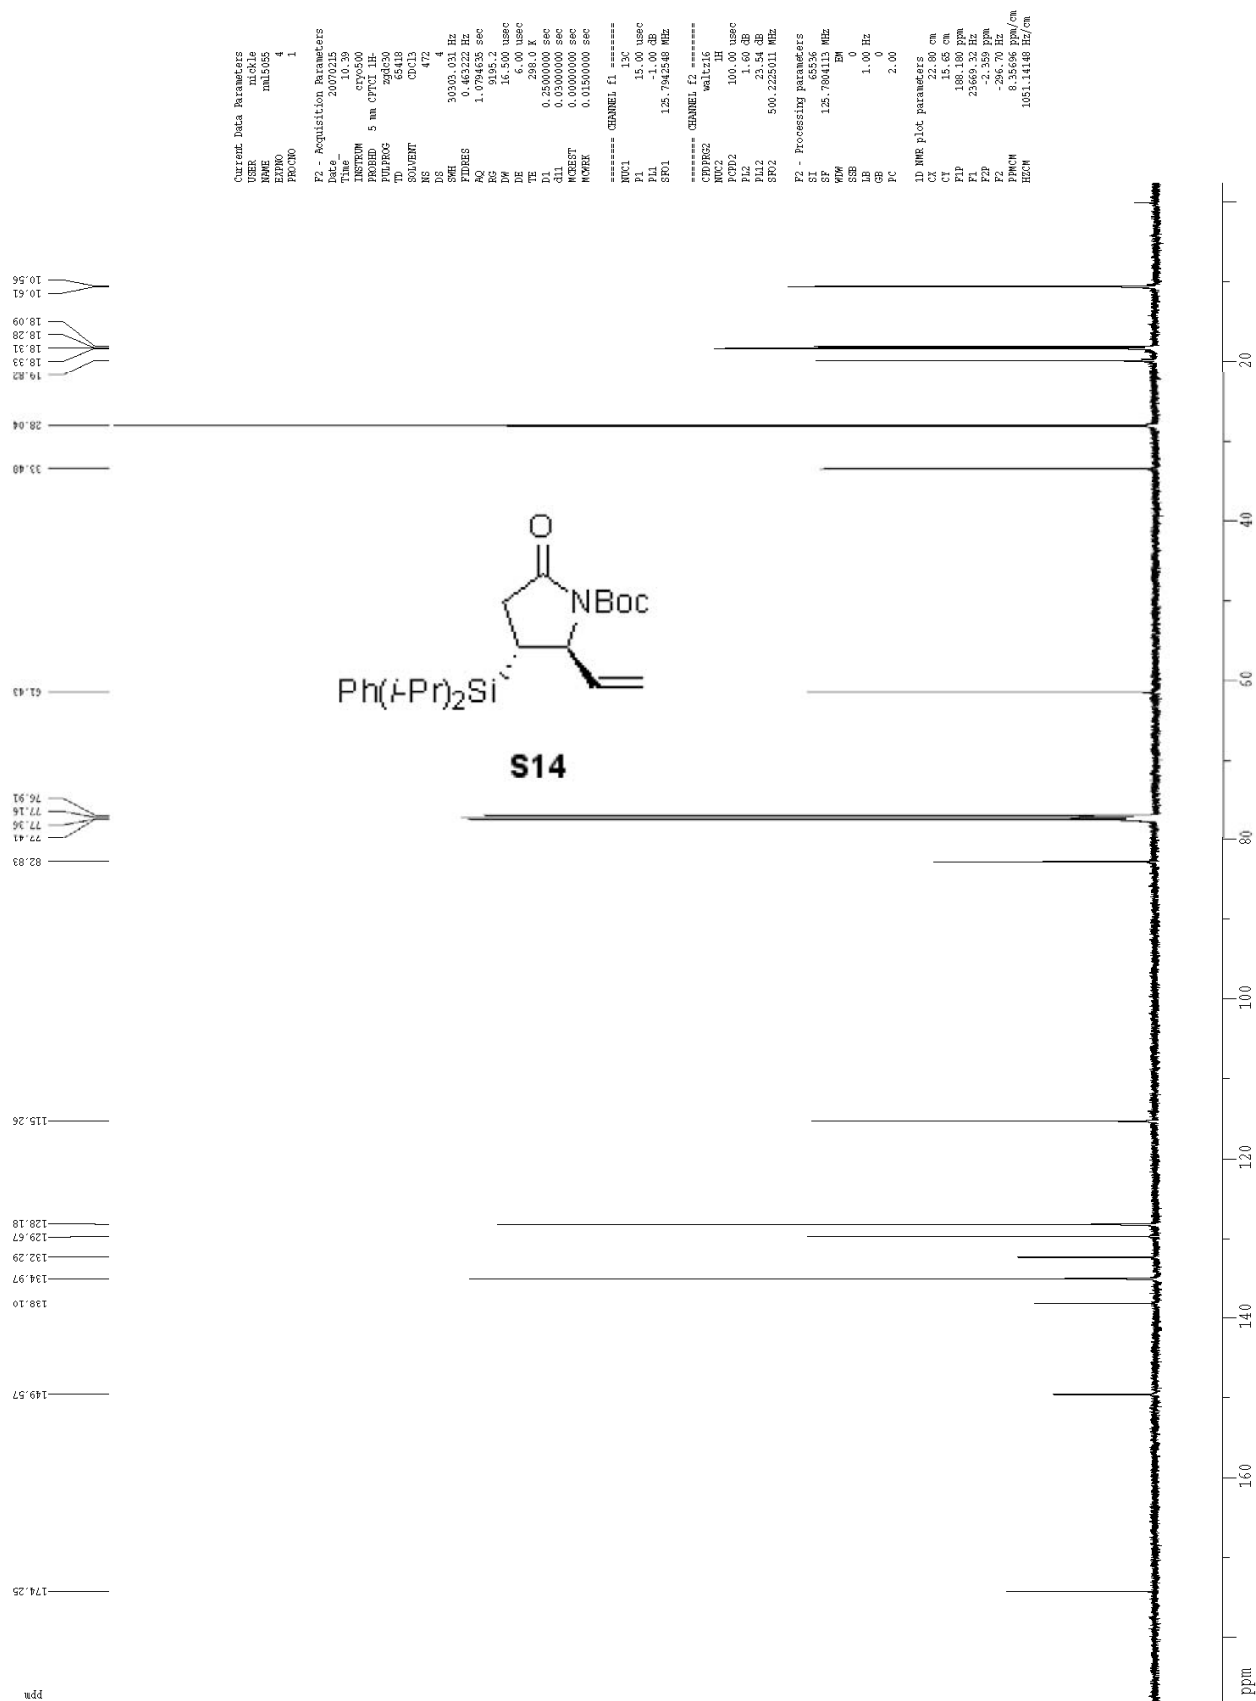

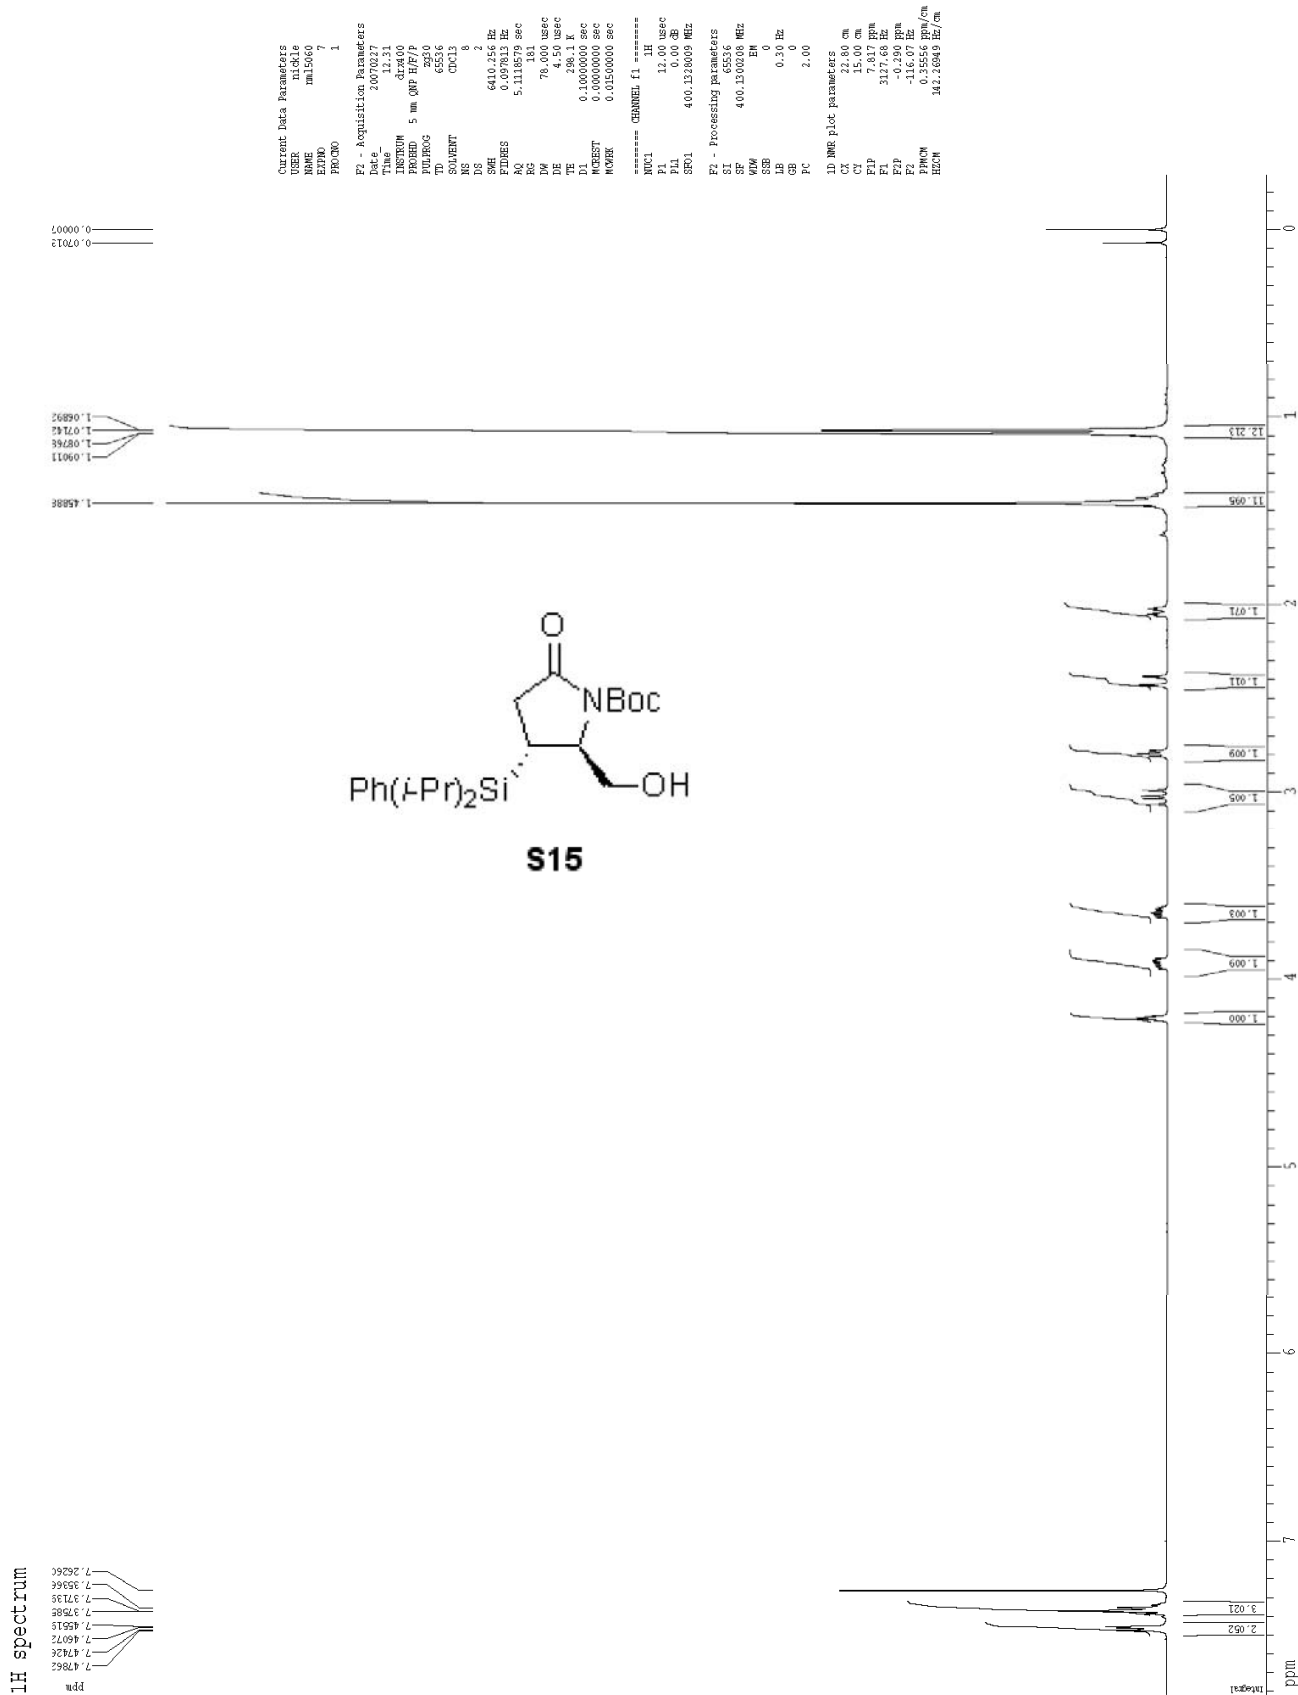

<sup>13</sup>C spectrum with <sup>1</sup>H decoupling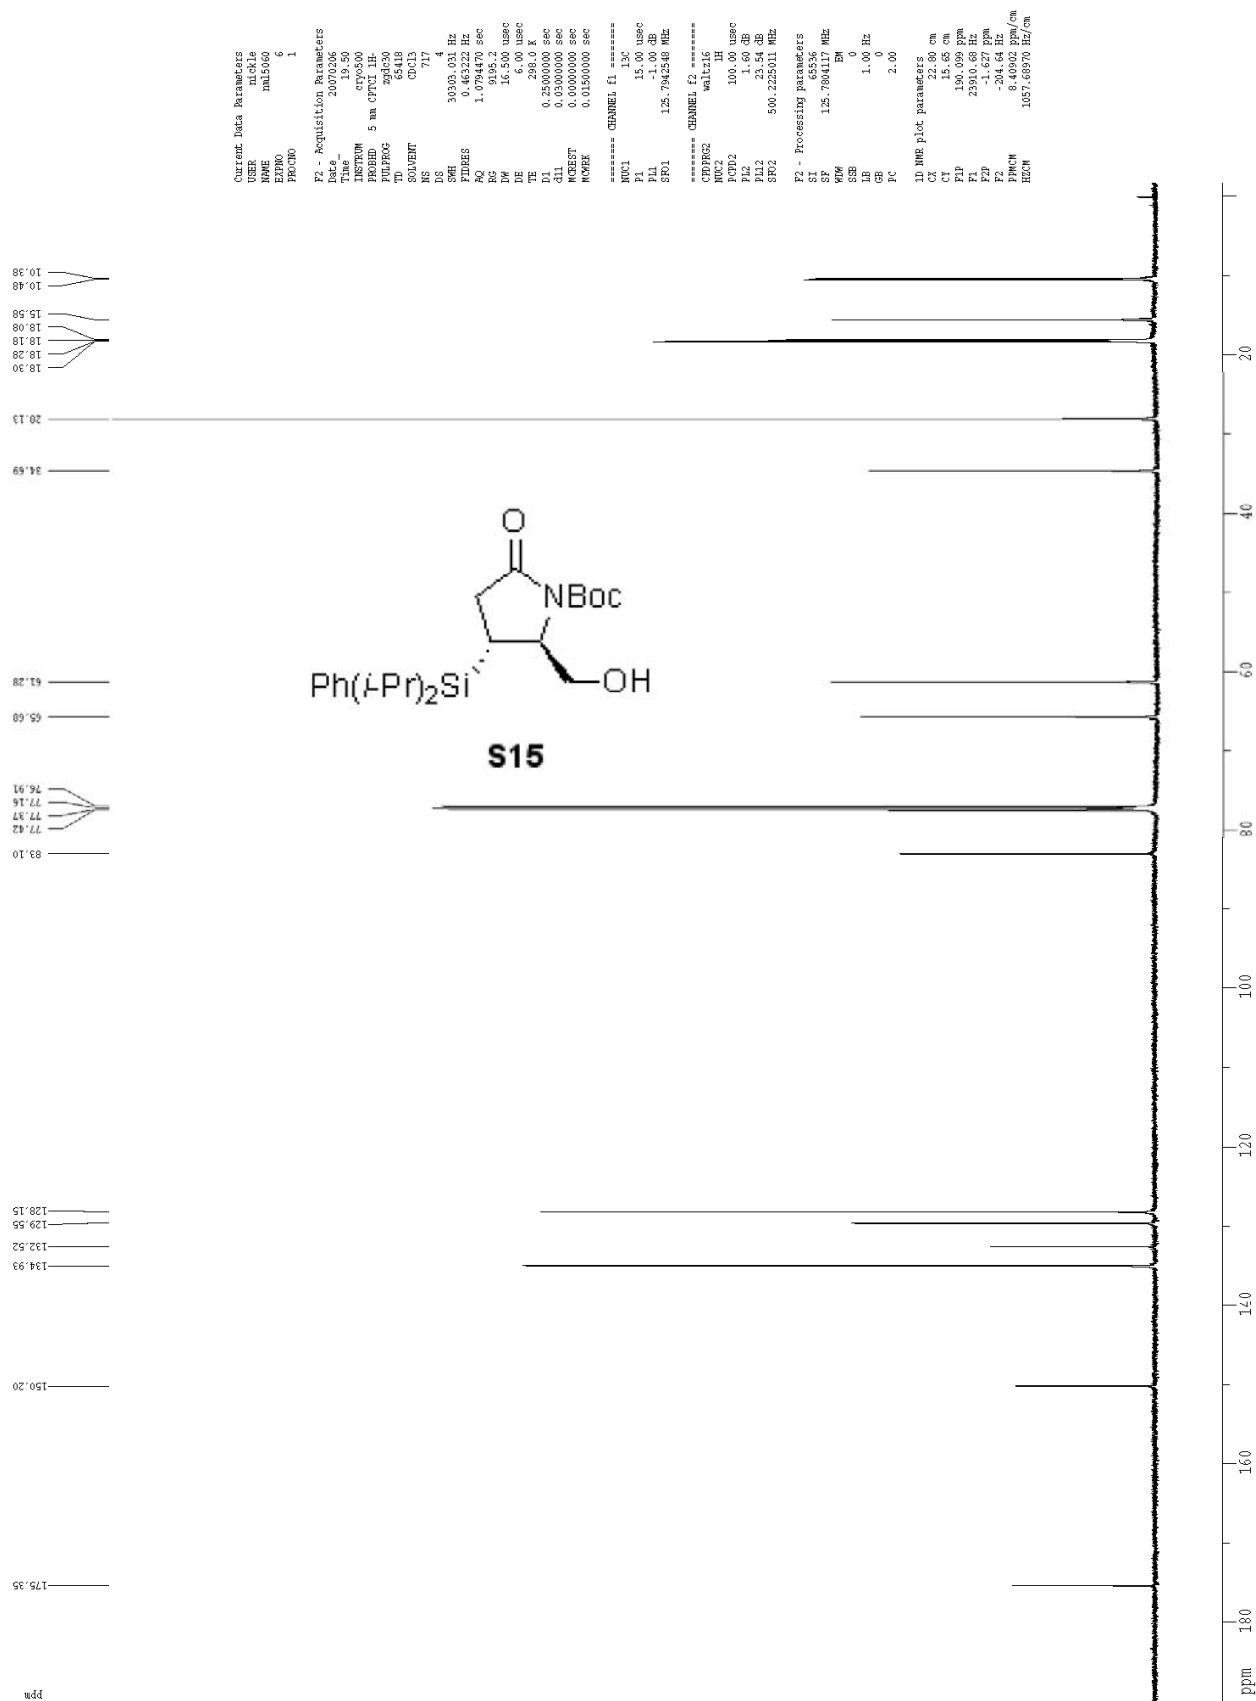

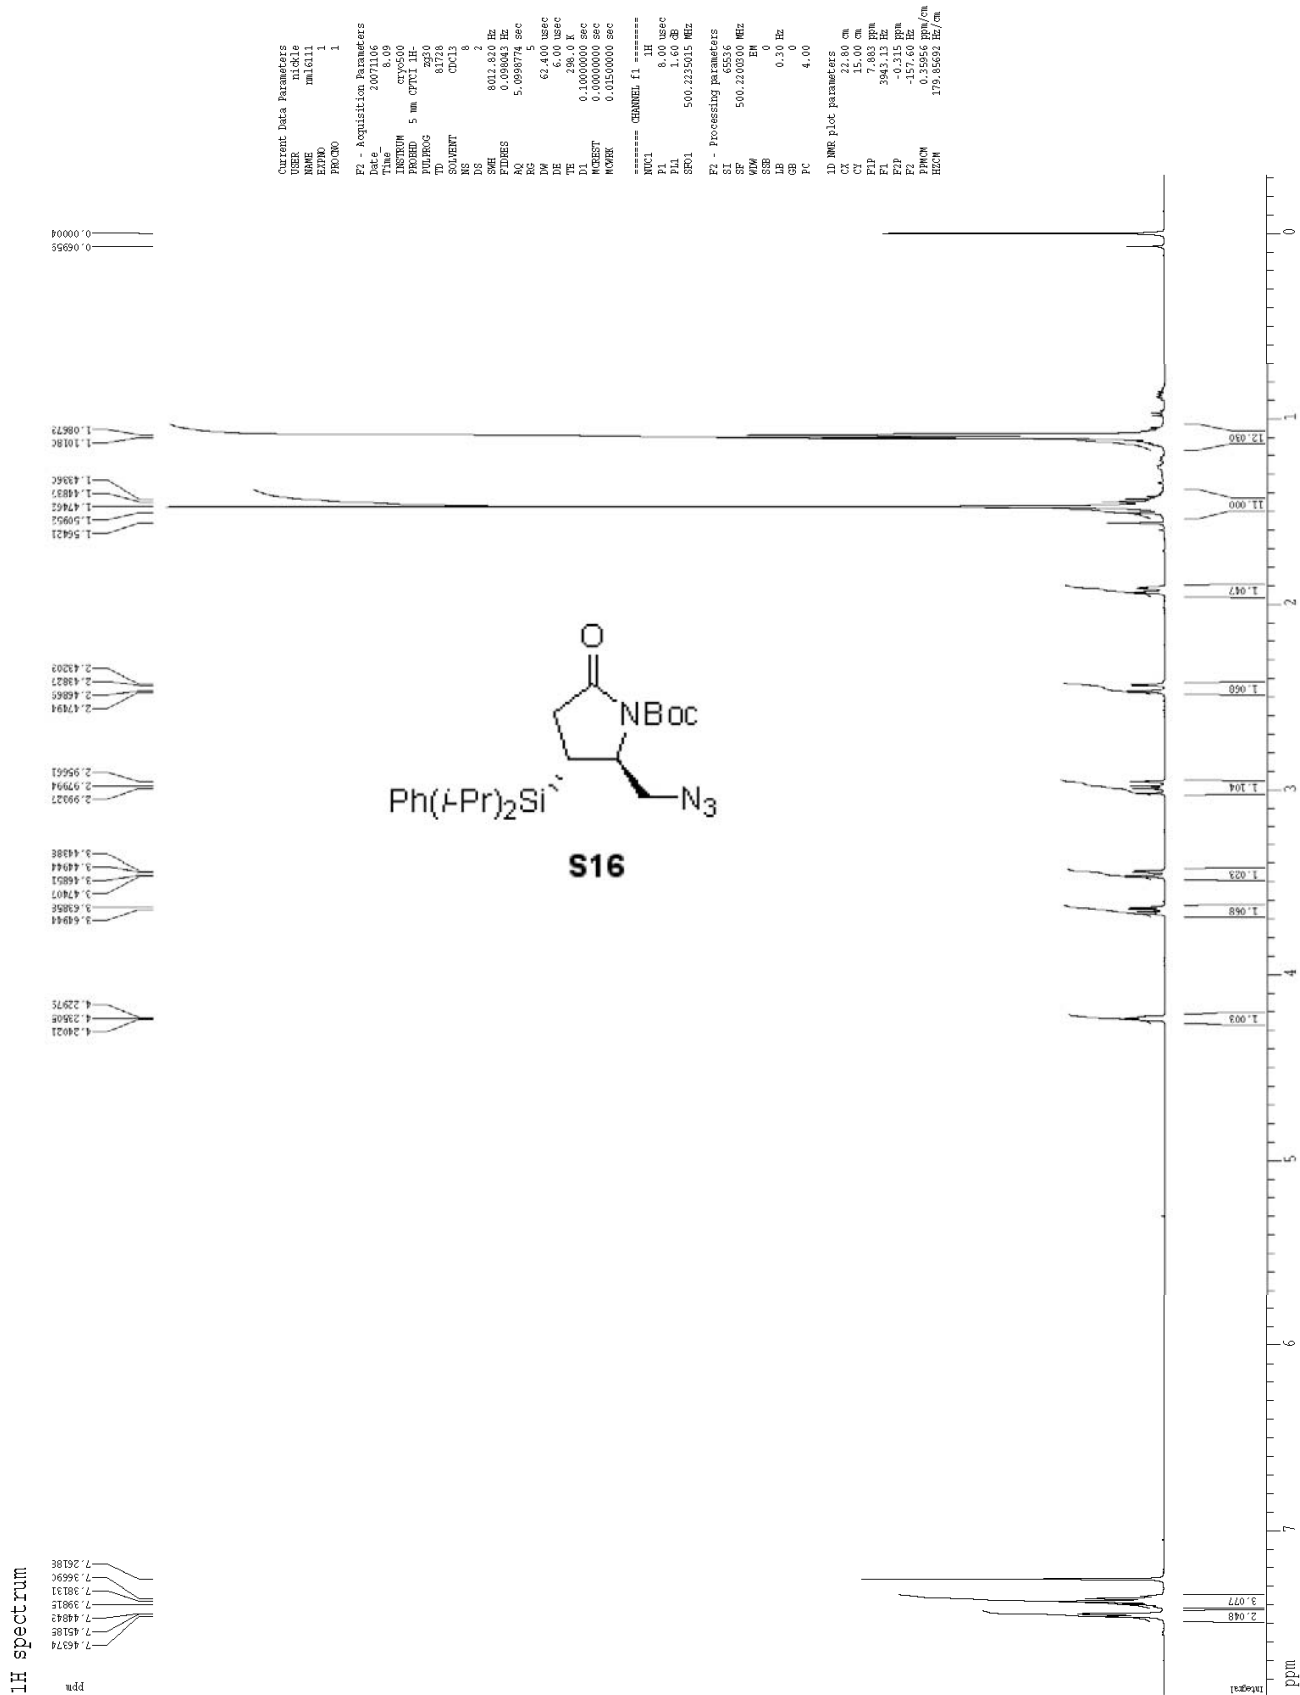



<sup>13</sup>C spectrum with <sup>1</sup>H decoupling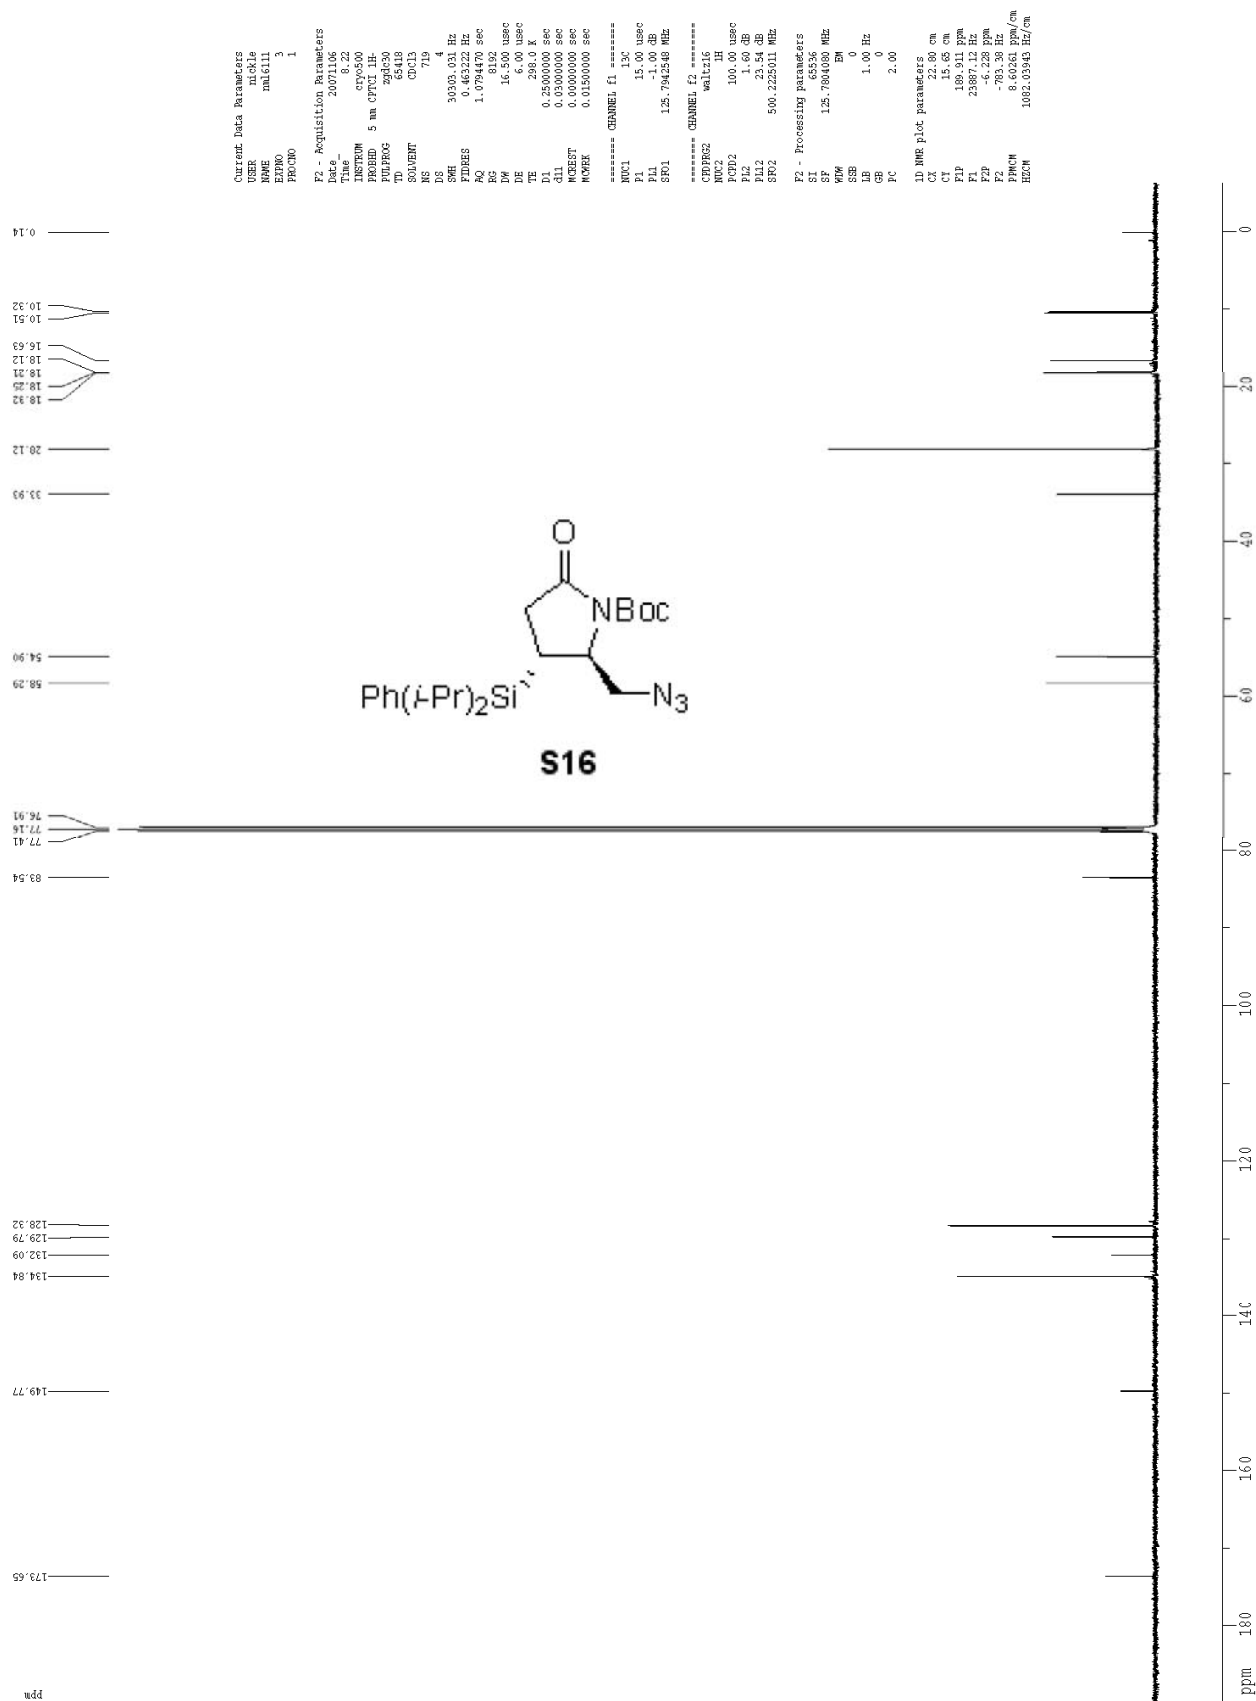



PI Woerpel  
c13 CDCl3T v nickle 32

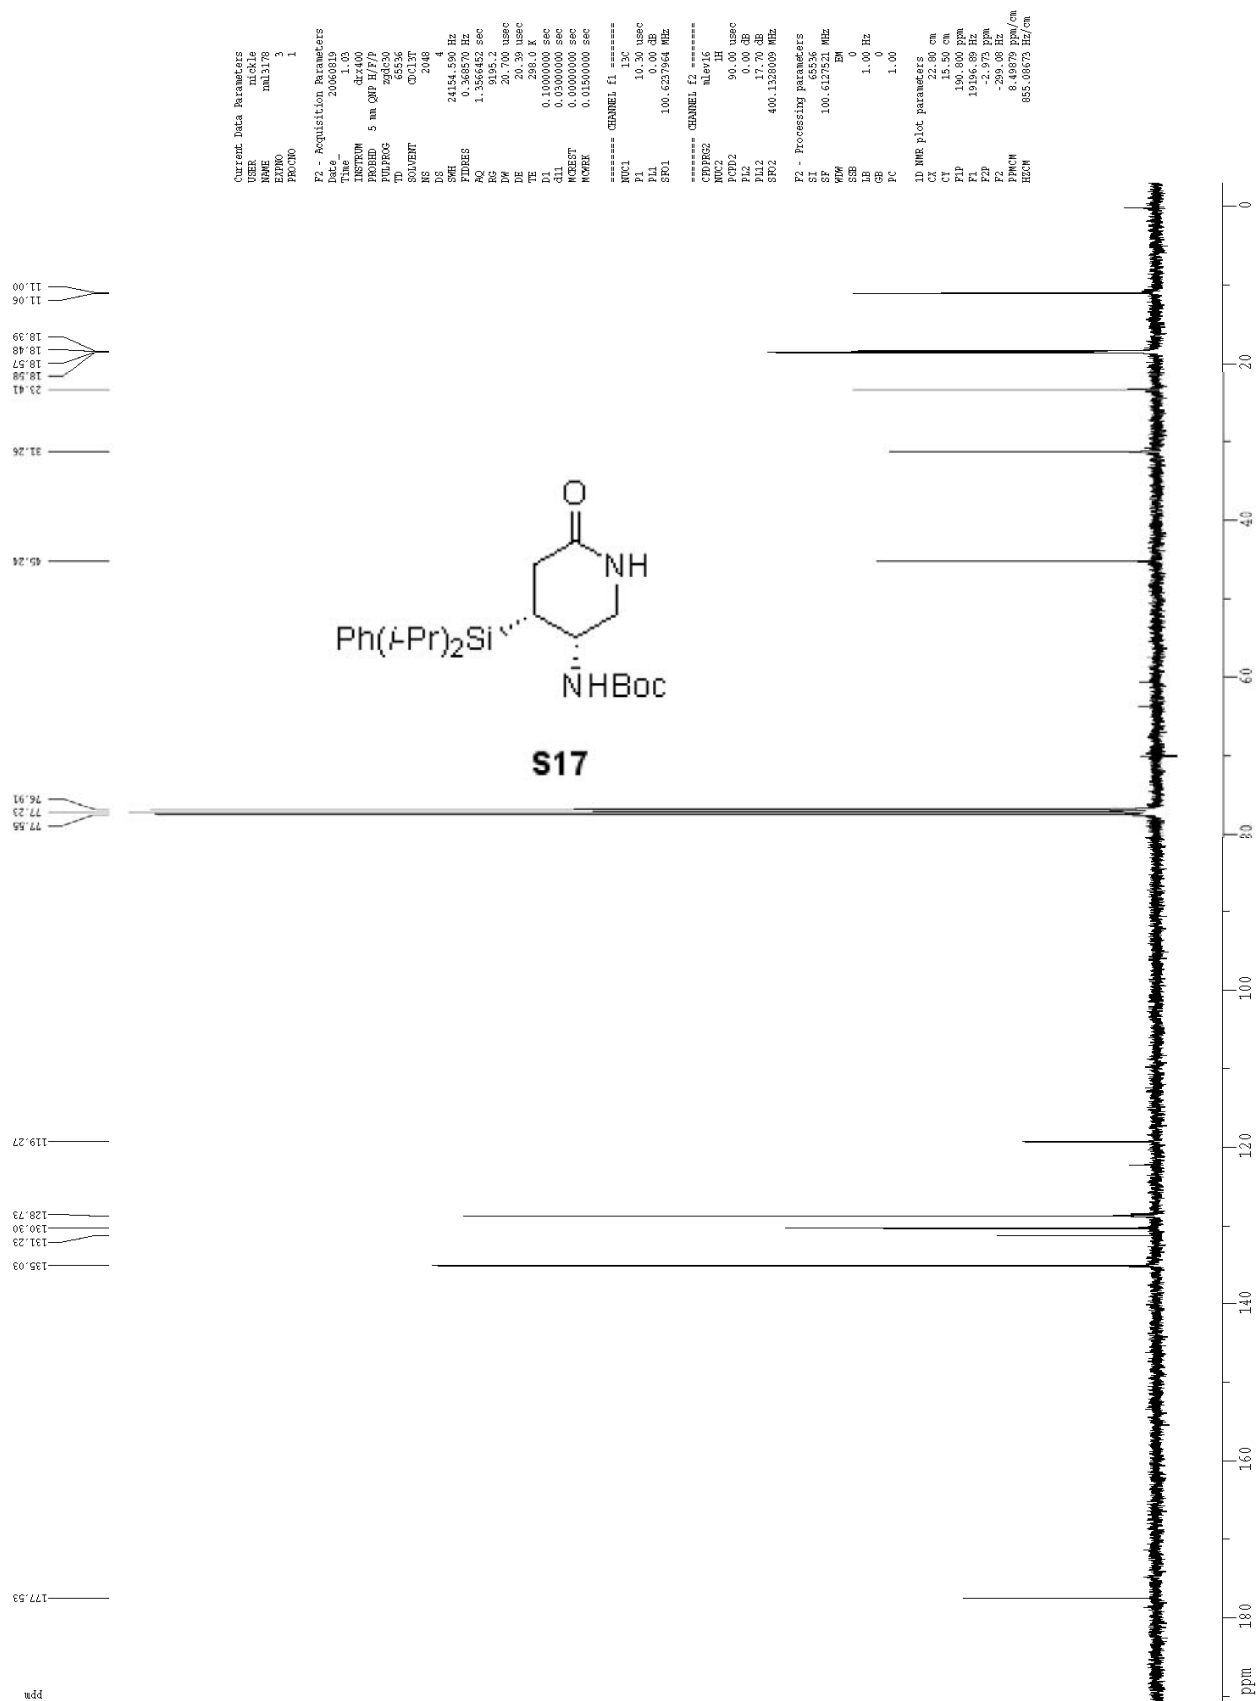

F1 Woerpel  
h1 CDCl3 v nickle 53

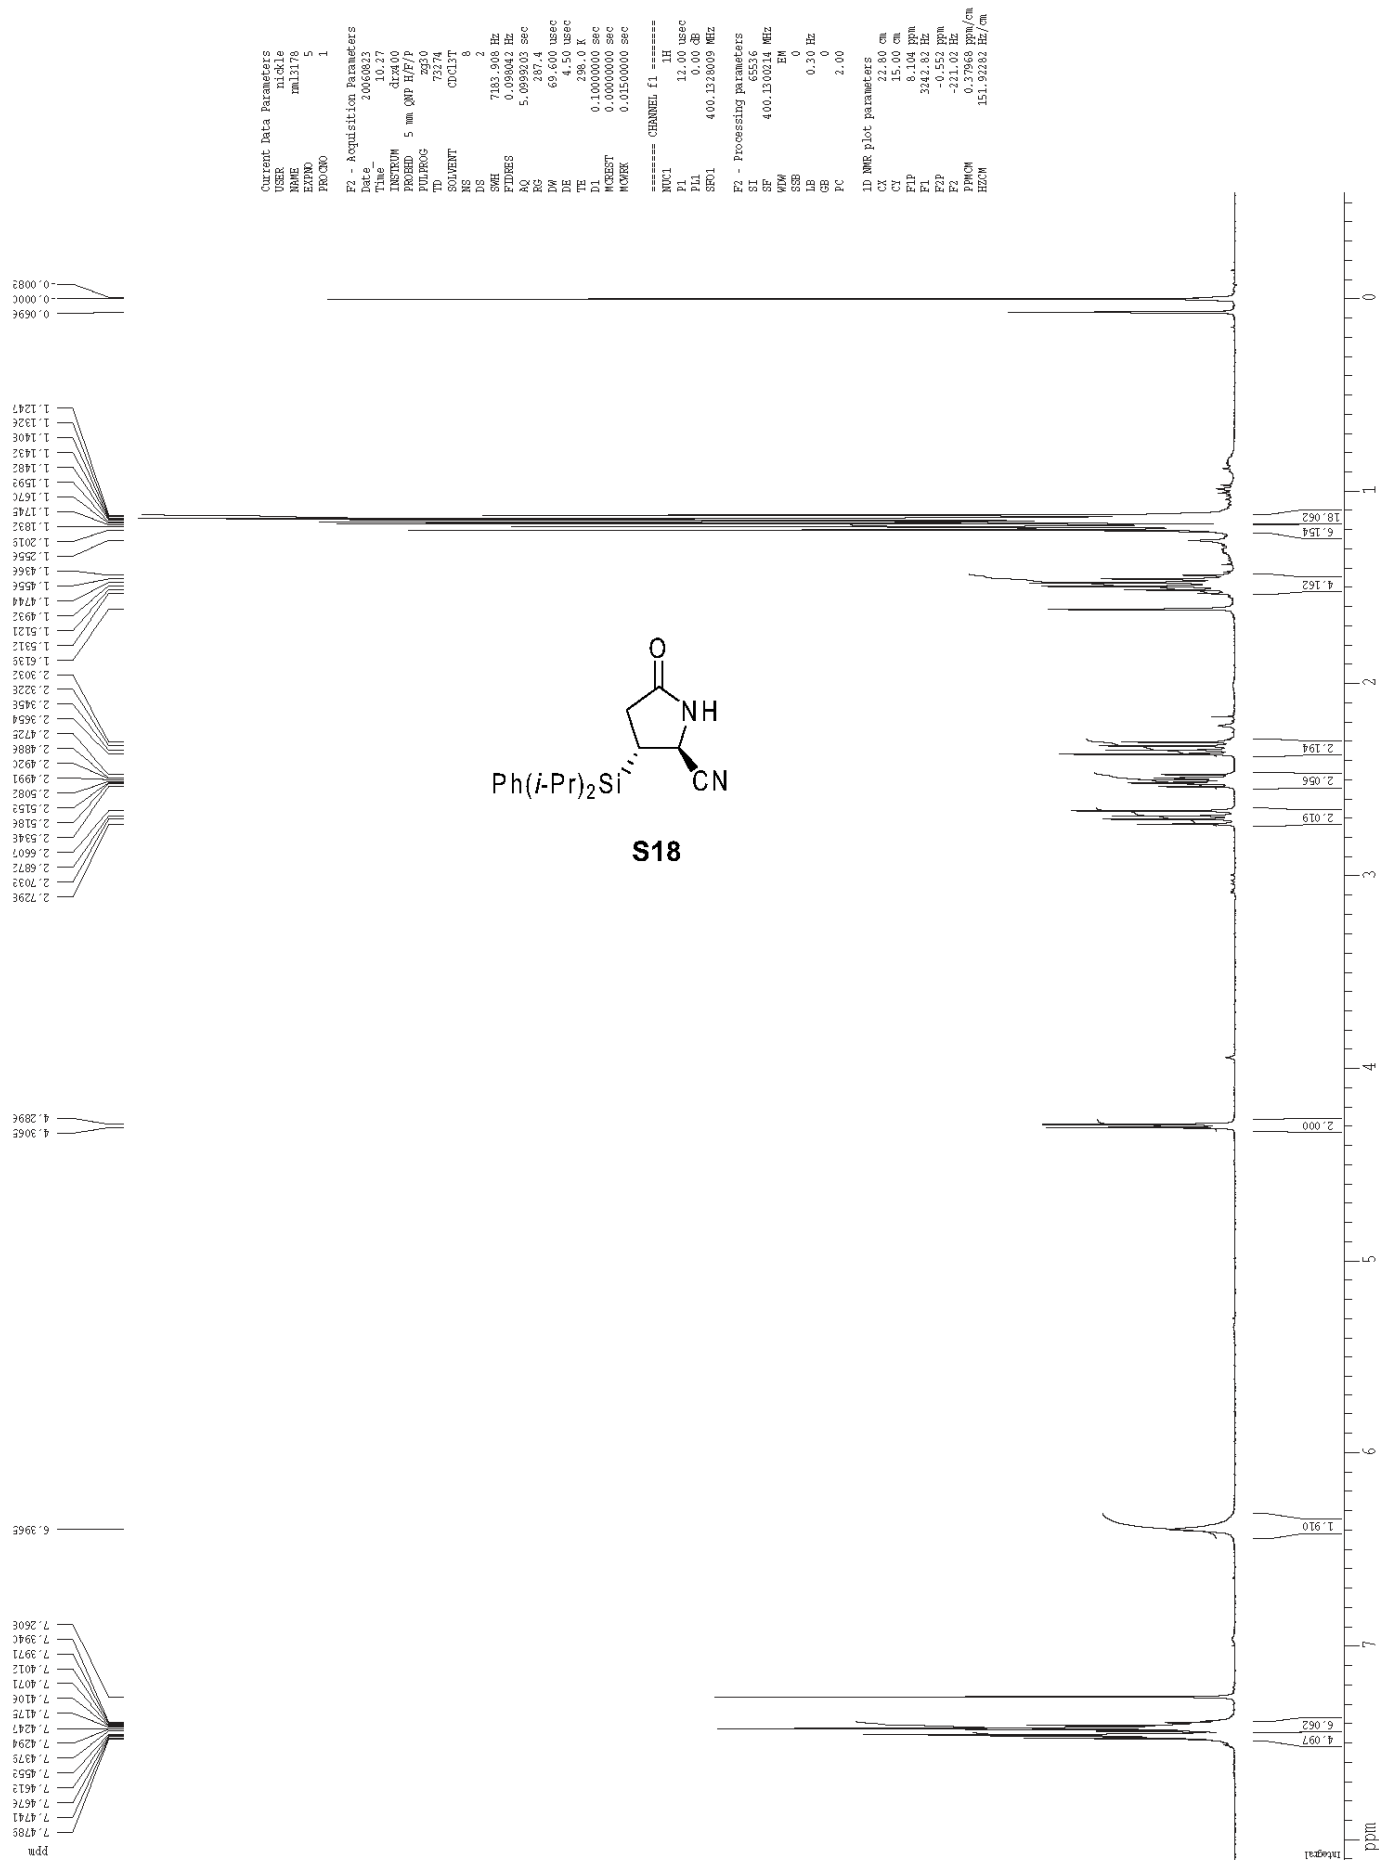

F1 Woerpel  
c13 CDCl3T v nickle 32

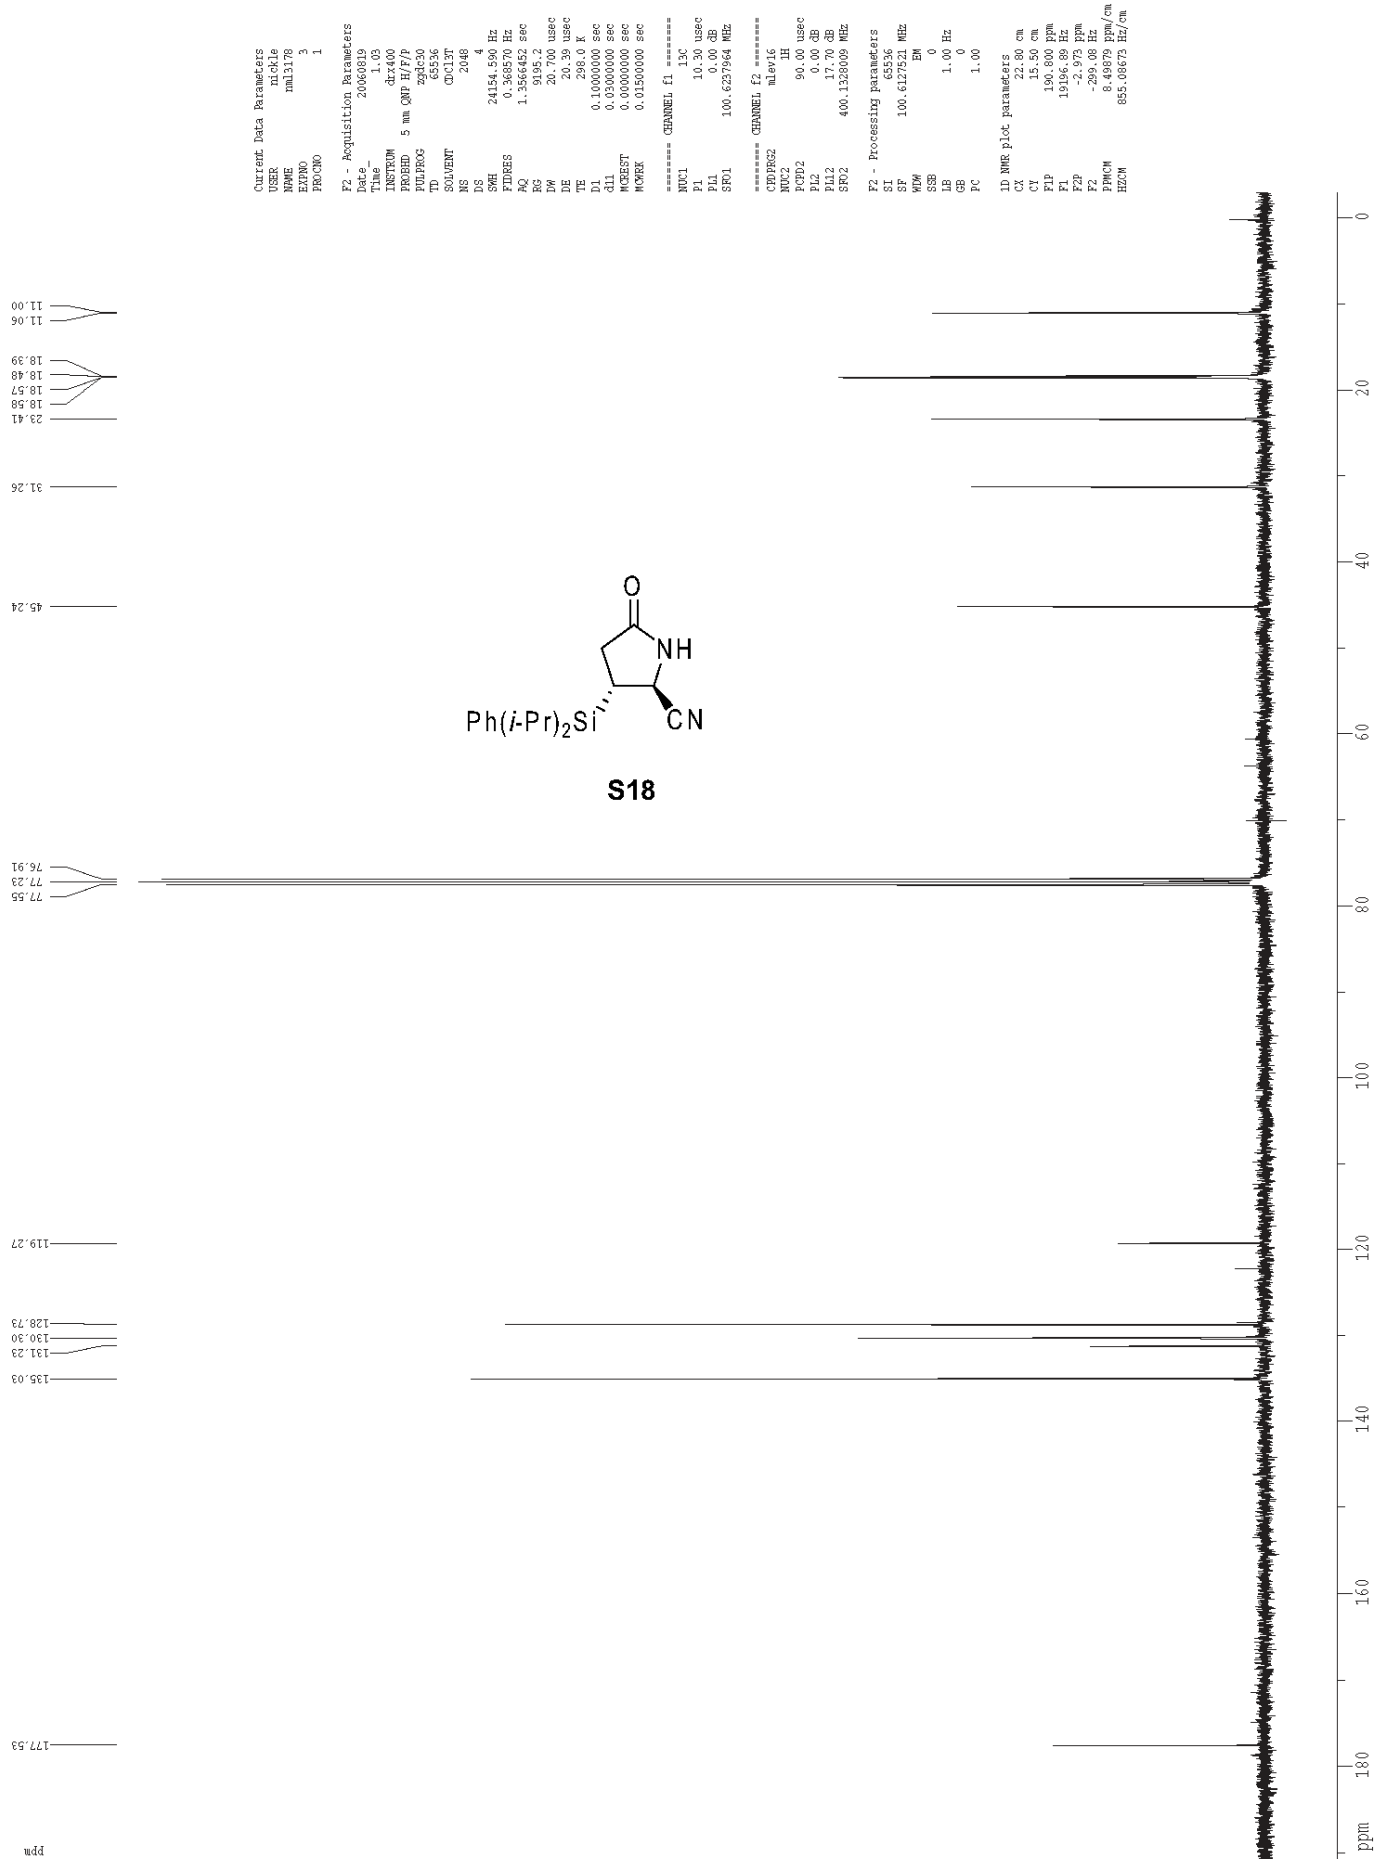

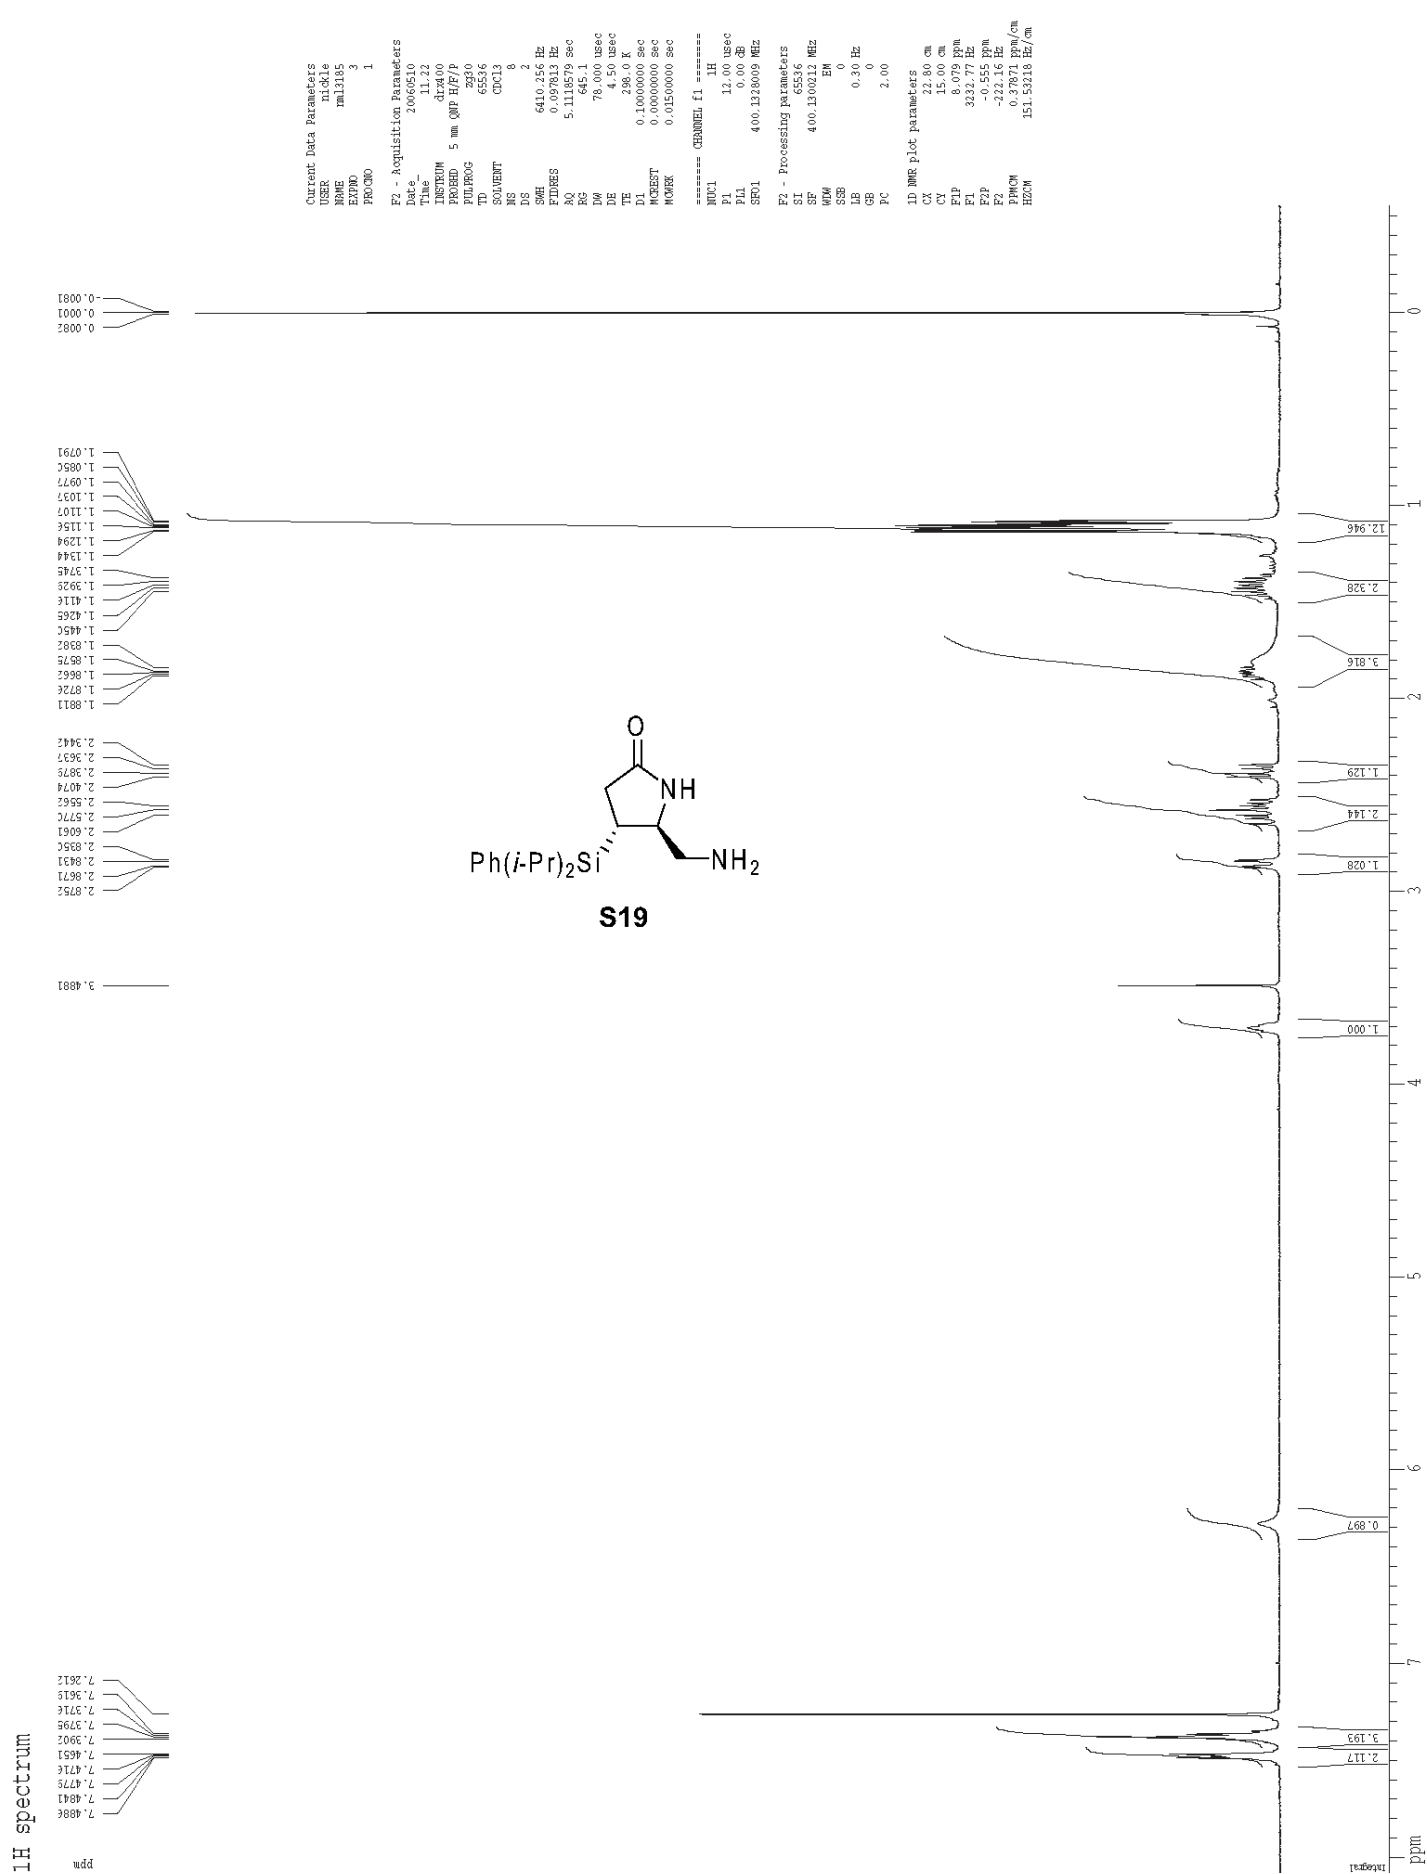



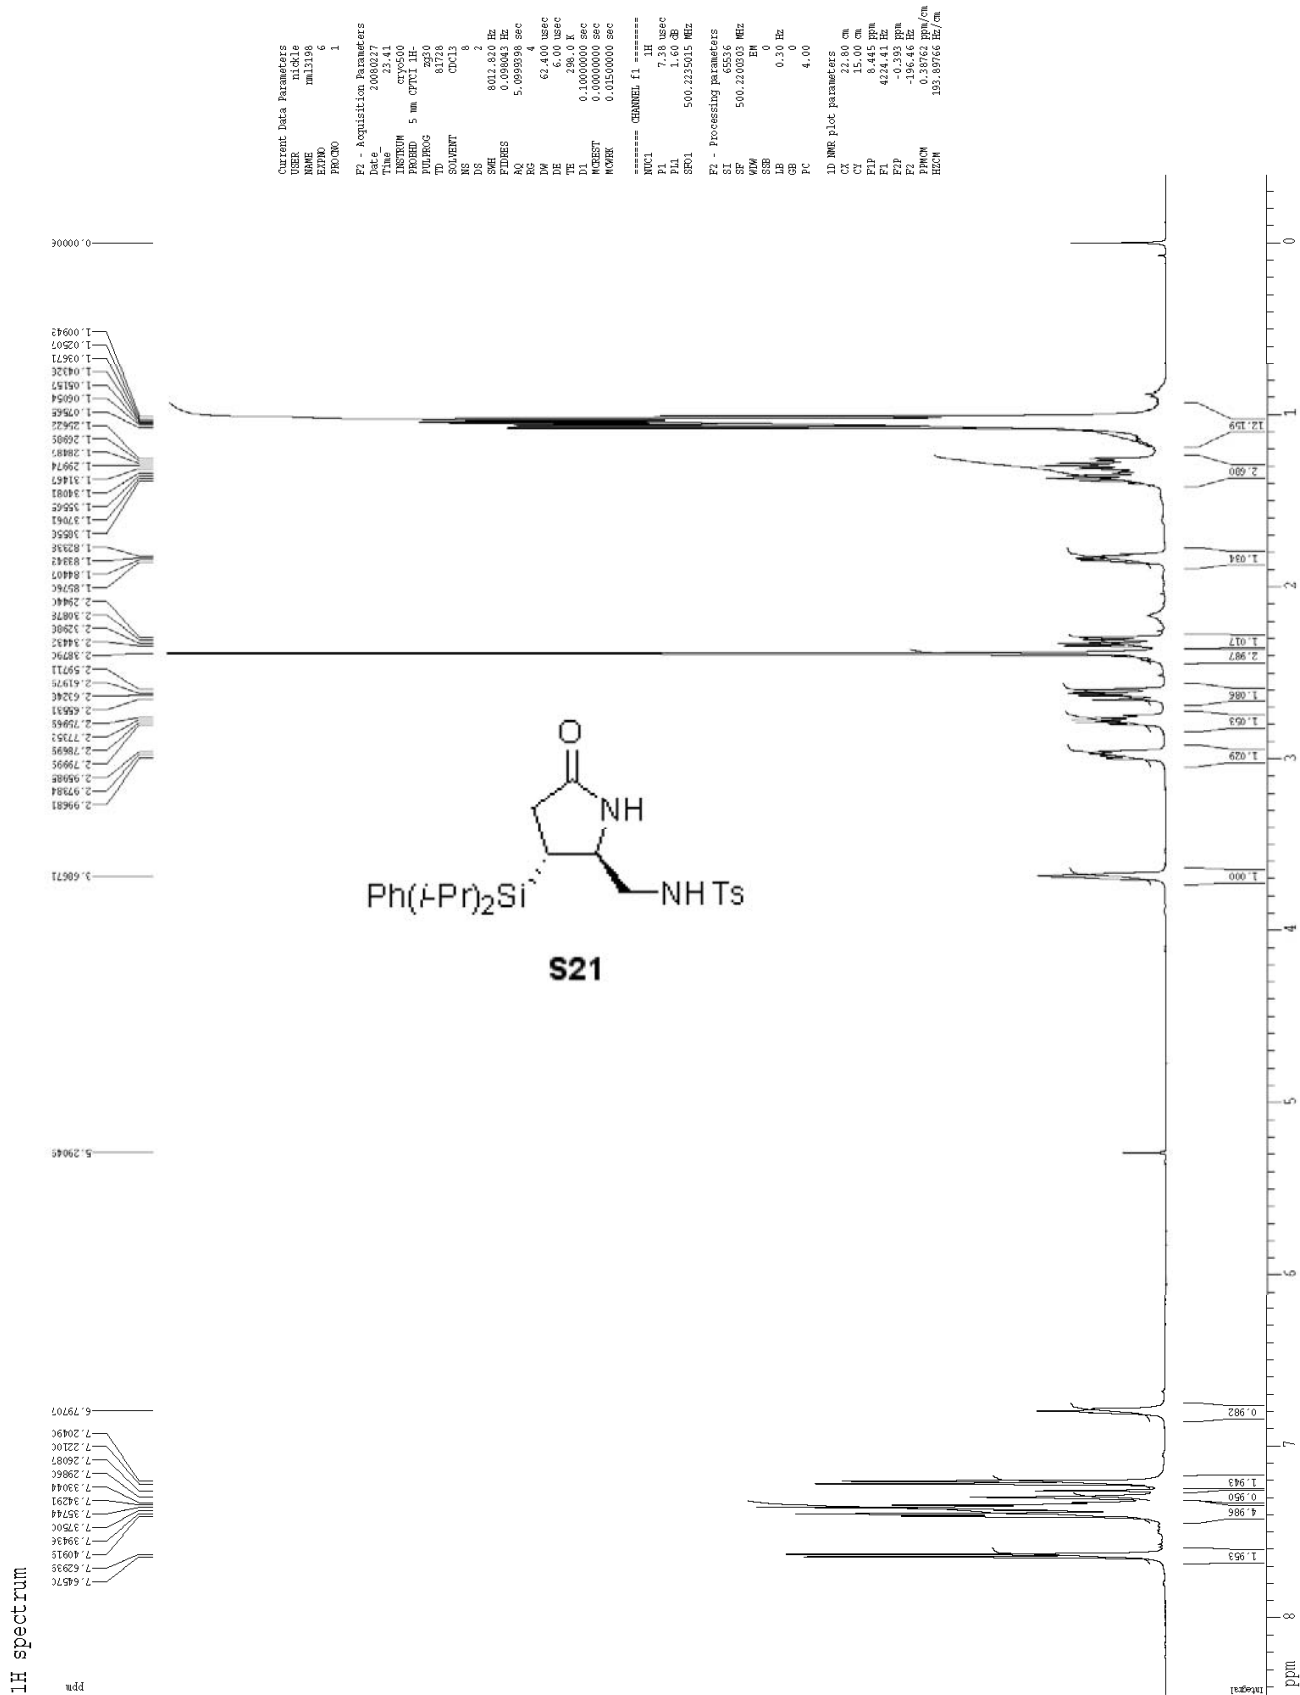



<sup>13</sup>C spectrum with <sup>1</sup>H decoupling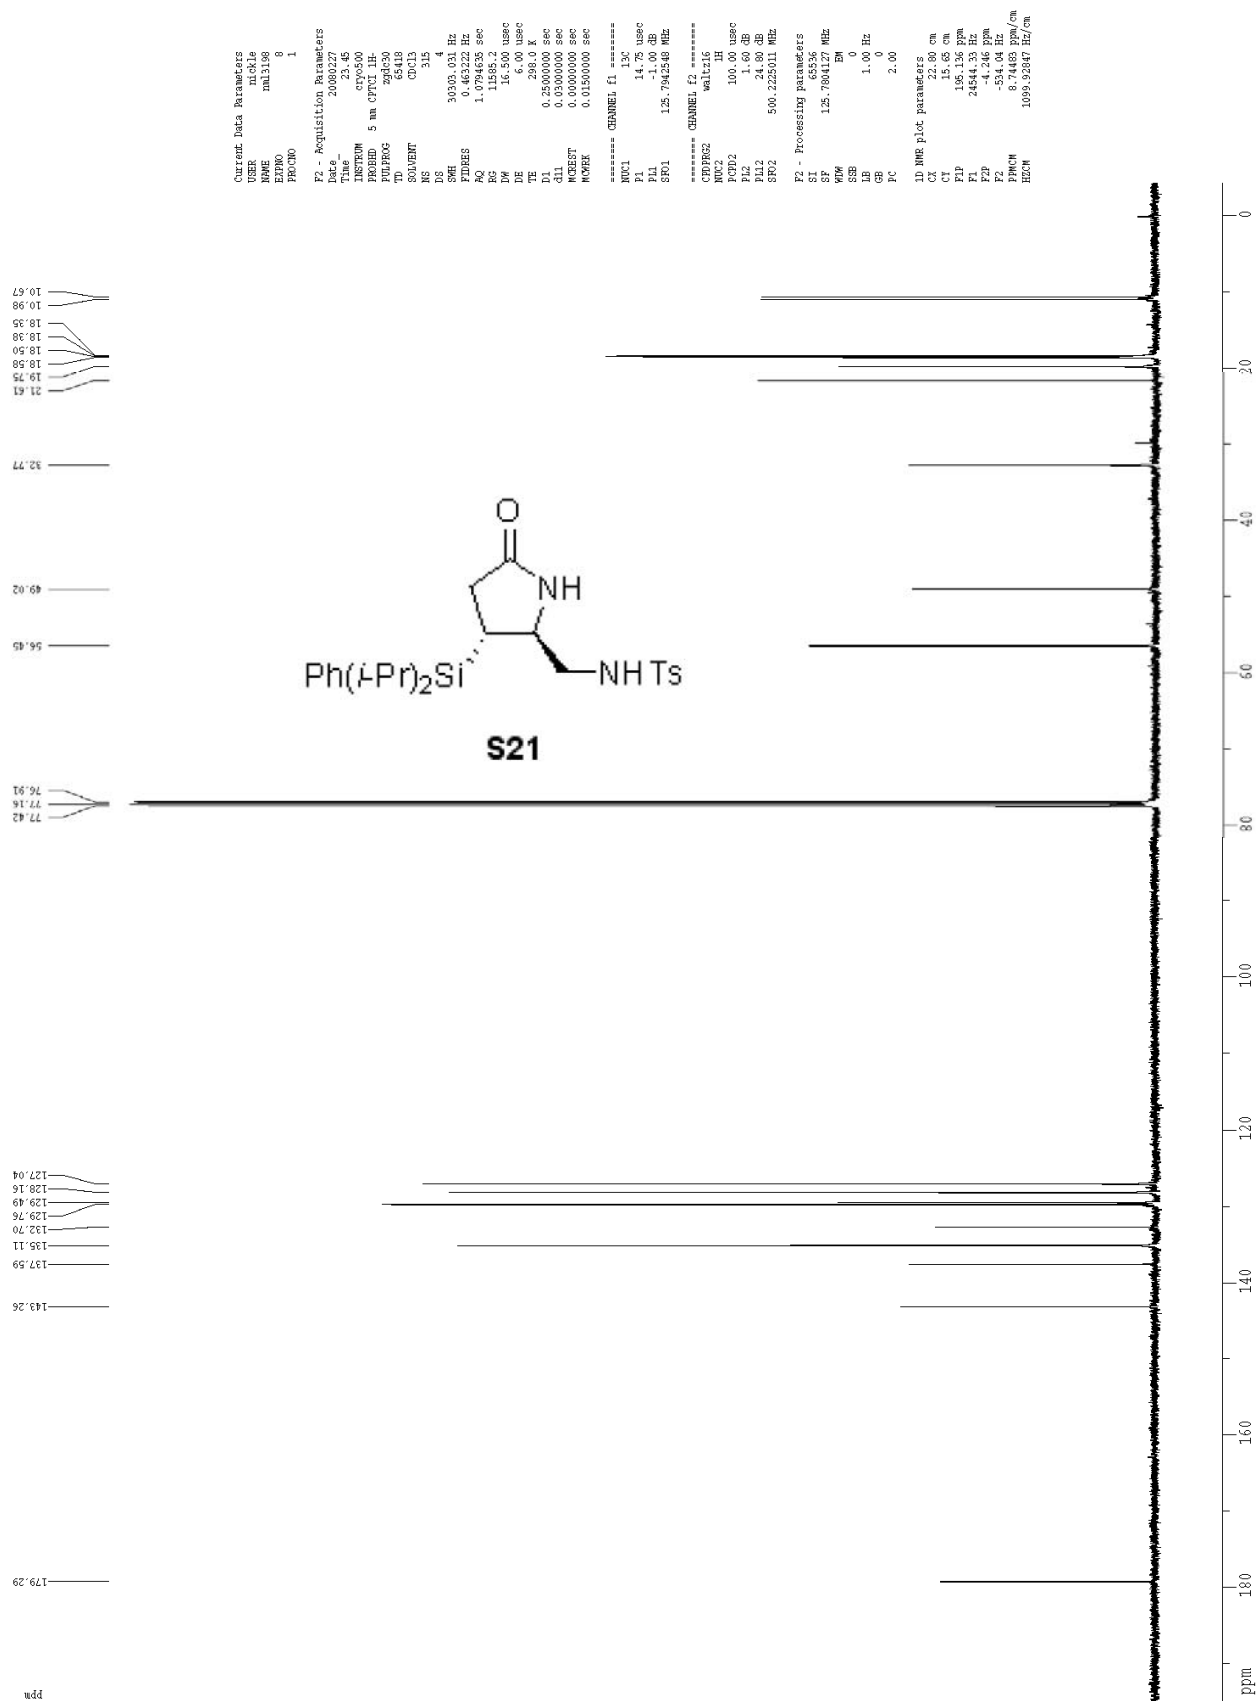

<sup>1</sup>H spectrum

ppm

7.47356  
7.46097  
7.45808  
7.44466  
7.43631  
7.43206  
7.41782  
7.41434  
7.26276

3.98800

2.67660  
2.67041  
2.65342  
2.63925

2.04767

1.66914  
1.50274  
1.20435  
1.18823  
1.18601  
1.18155  
1.16987  
1.16295  
1.14740  
1.12887

0.06956  
0.00011

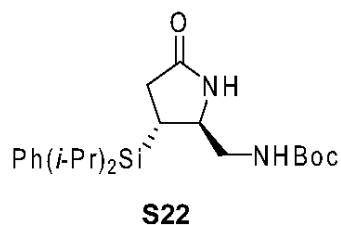

Current Data Parameters  
 USER nickie  
 NAME 1613192  
 EXPNO 2  
 PROCNO 1  
 F2 - Acquisition Parameters  
 Date\_ 20060516  
 Time 16.34  
 INSTRUM dr400  
 PROBRD 5 mm QNP H/P  
 PULPROG zgpg30  
 PC 65536  
 SOLVENT CDCl3  
 NS 8  
 DS 2  
 SWH 6410.256 Hz  
 FIDRES 0.097813 Hz  
 AQ 5.1118579 sec  
 RG 574.7  
 DW 78.000 usec  
 DE 4.50 usec  
 TE 300.2 K  
 T1 0.10000000 sec  
 T1RHO 0.00000000 sec  
 MCHST 0.00000000 sec  
 MCHKE 0.01500000 sec  
 ===== CHANNEL f1 =====  
 NUC1 1H  
 P1 12.00 usec  
 PL1 0.00 dB  
 SFO1 400.1326009 MHz  
 F2 - Processing parameters  
 SI 65536  
 SF 400.1300208 MHz  
 WDM 0  
 EM 0  
 SSB 0  
 LB 0.30 Hz  
 GB 0  
 PC 2.00  
 1D FID plot parameters  
 CX 22.80 cm  
 CY 15.00 cm  
 F1F 8.697 ppm  
 F1 3480.10 Hz  
 F2F -0.509 ppm  
 F2 -103.47 Hz  
 FWHM 0.40377 ppm/cm  
 HZM 161.56004 Hz/cm

Integral

ppm

12.502  
2.193  
8.996  
1.157  
2.033  
1.037  
1.000  
1.108

0  
1  
2  
3  
4  
5  
6  
7  
8

<sup>13</sup>C spectrum with <sup>1</sup>H decoupling

wdd

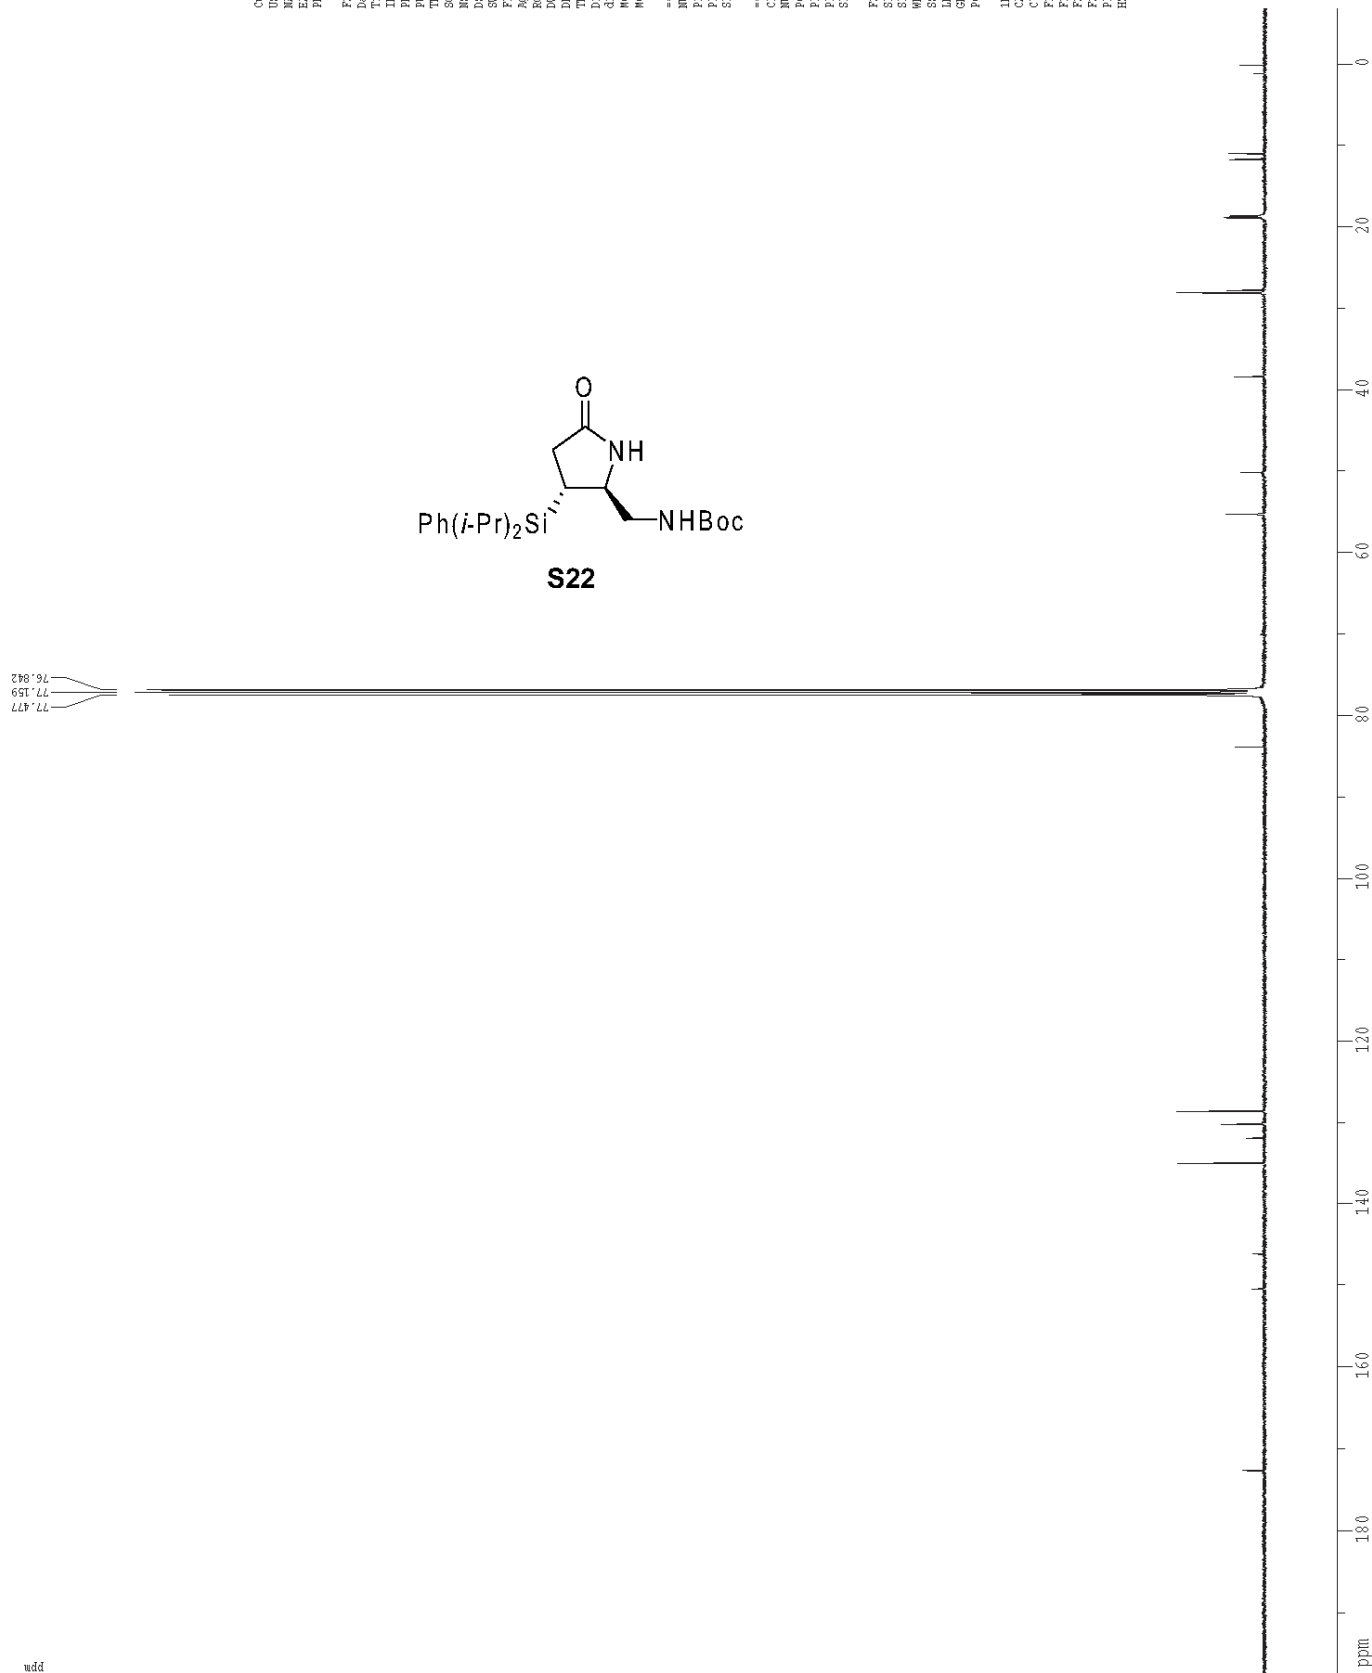

Current Data Parameters  
 USER mckie  
 NAME ml3192  
 EXPNO 4  
 PROCNO 1

F2 - Acquisition Parameters  
 Date\_ 20060531  
 Time 8.07  
 INSTRUM drx400  
 PROBHD 5 mm QNP H/F/P  
 PULPROG zgpg30  
 TD 65536  
 SOLVENT CDCl3  
 NS 4  
 DS 4  
 SWH 24154.590 Hz  
 FIDRES 0.368570 Hz  
 AQ 1.35664452 sec  
 RG 9195.2  
 DW 20.700 usec  
 DE 20.39 usec  
 TE 297.9 K  
 D1 0.10000000 sec  
 d11 0.03000000 sec  
 ACQRES 0.00000000 sec  
 FWHM 0.01500000 sec

===== CHANNEL f1 =====  
 NUC1 <sup>13</sup>C  
 P1 10.30 usec  
 PL1 0.00 dB  
 SFO1 100.6237964 MHz

===== CHANNEL f2 =====  
 CDPFG2 mlev16  
 NUC2 <sup>1</sup>H  
 P2 90.00 usec  
 PL2 19.00 dB  
 PL12 17.20 dB  
 SFO2 400.1328099 MHz

F2 - Processing parameters  
 SI 65536  
 SF 100.6127580 MHz  
 WDW EM  
 SSB 0  
 LB 1.00 Hz  
 GB 0  
 PC 1.00

1D FINE plot parameters  
 CX 22.80 cm  
 CY 15.50 cm  
 F1P 197.718 ppm  
 F1 19882.95 Hz  
 F2P -6.837 ppm  
 F2 -687.91 Hz  
 FPMCM 8.571172 ppm/cm  
 HZCM 902.66937 Hz/cm

Note: Compound **S23** is an intermediate in the formation of azide **3** (Scheme 1.)

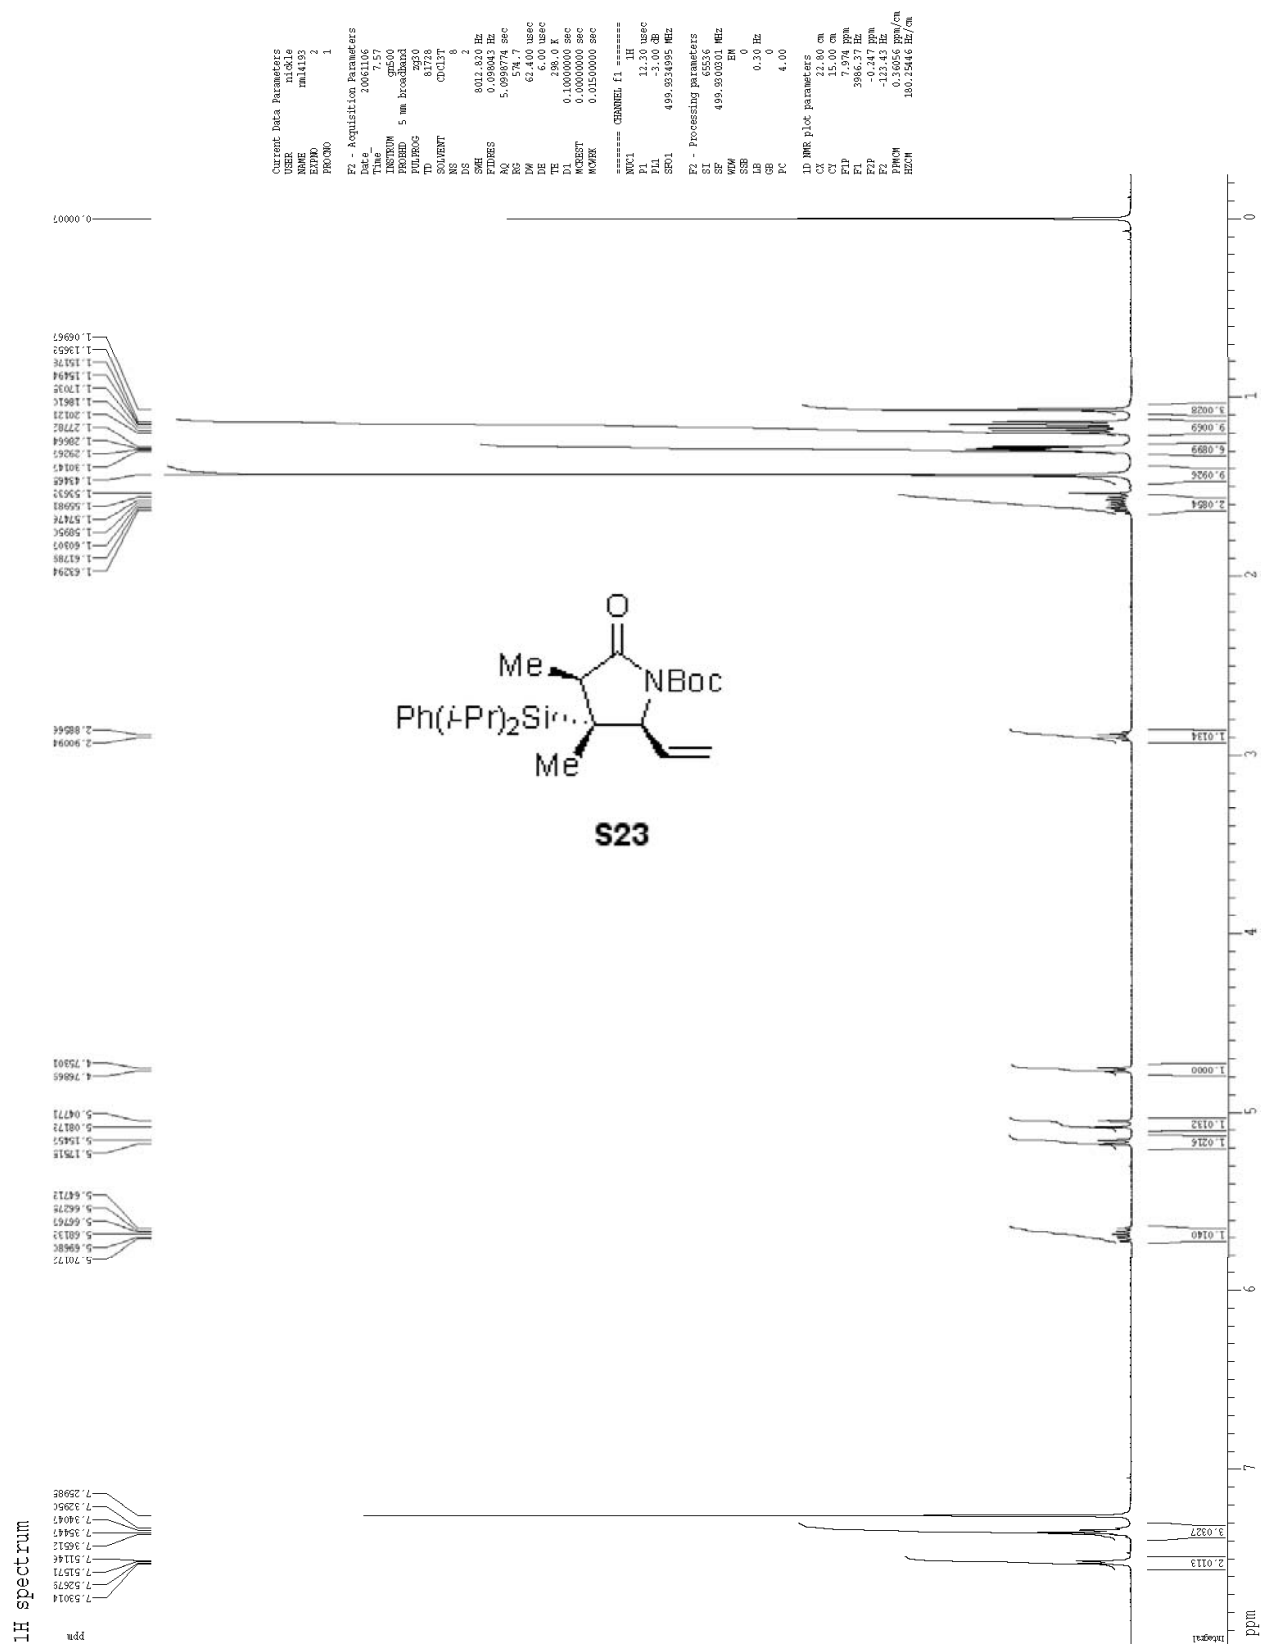

PI Woerpel  
c13 CDC13T v nickle 10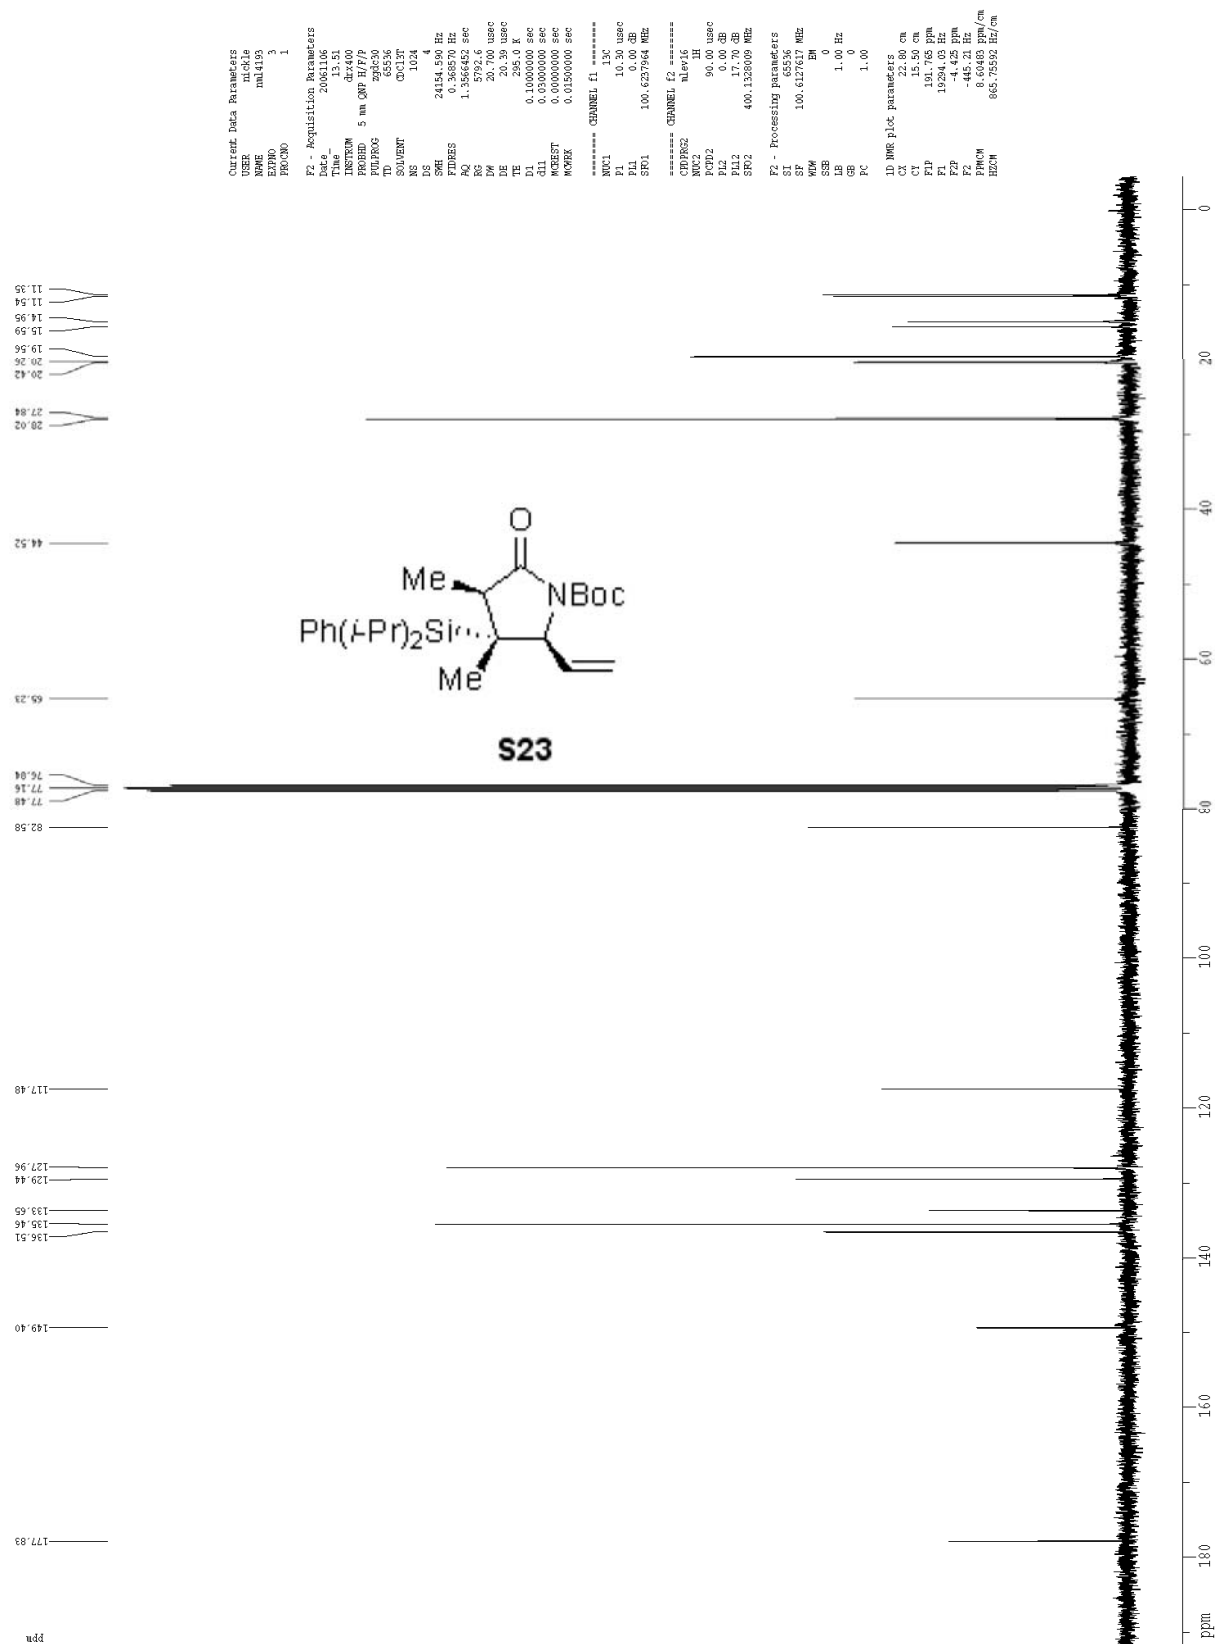

<sup>1</sup>H spectrum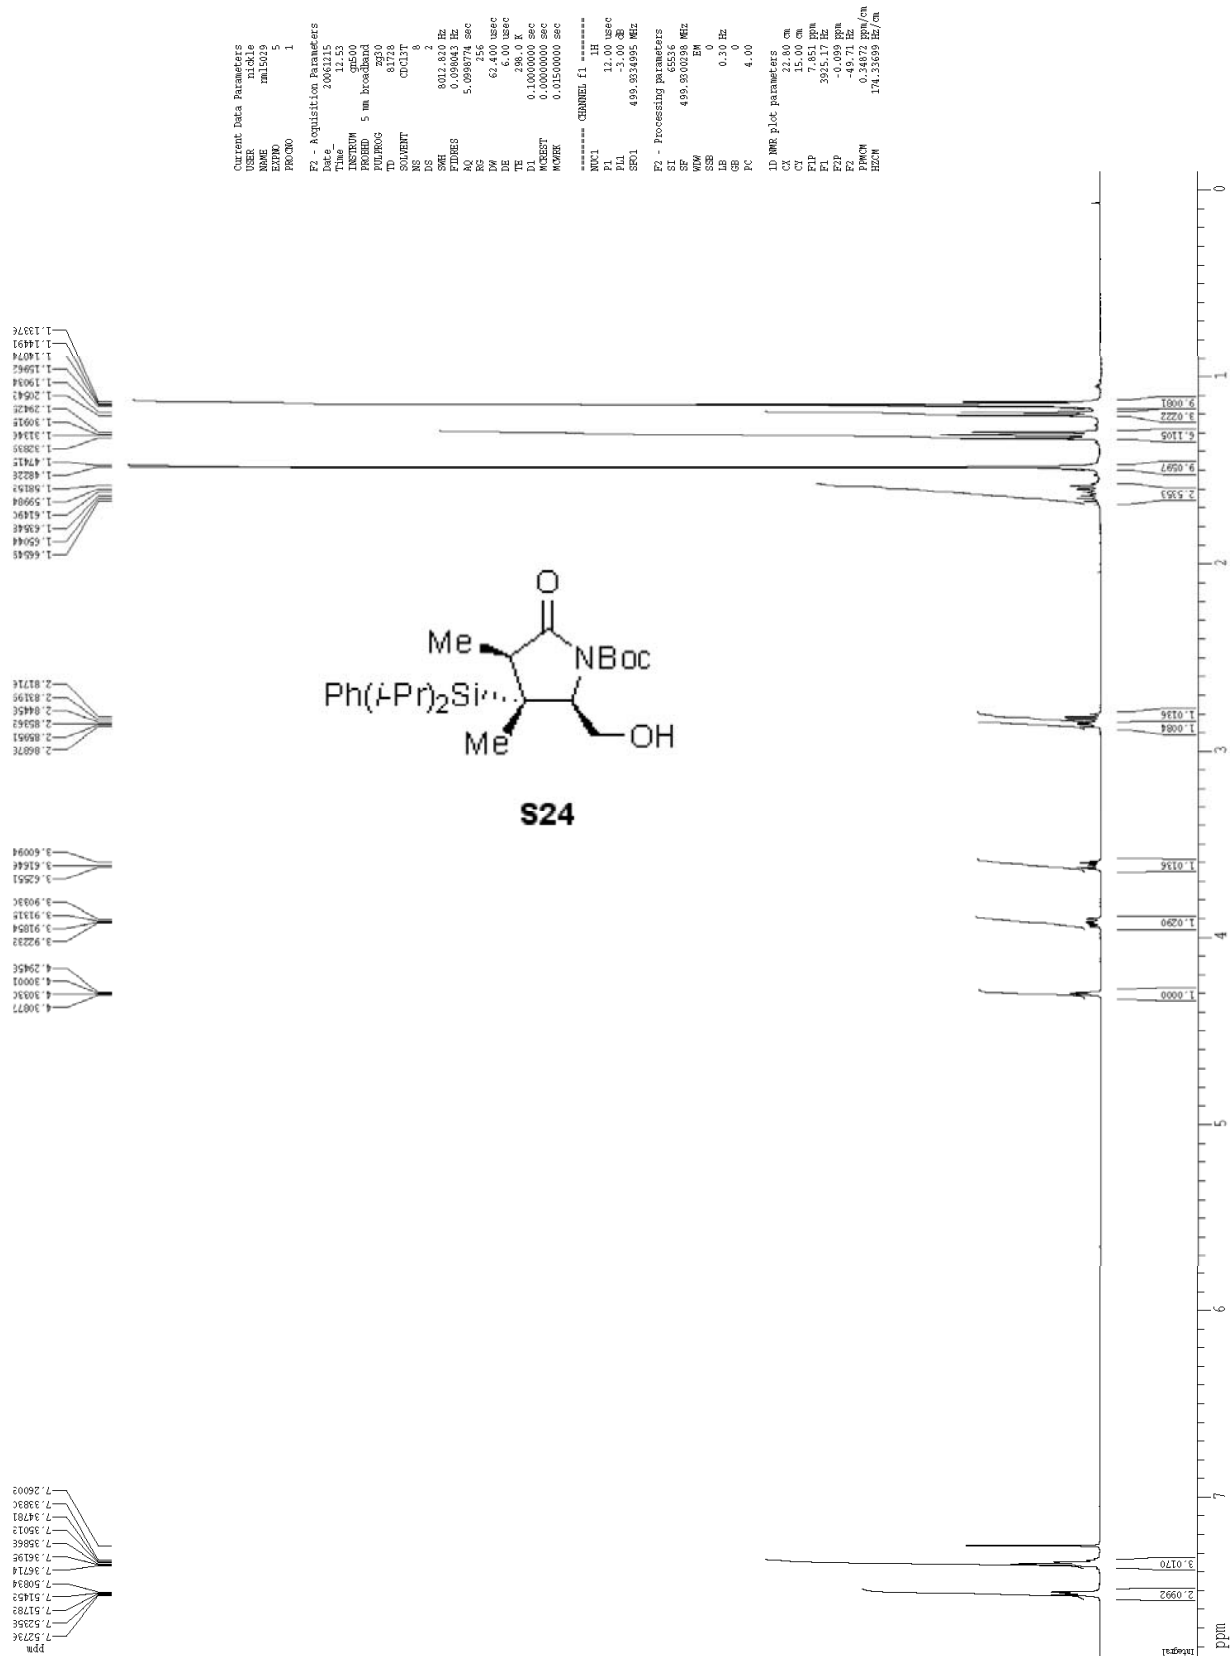

<sup>13</sup>C spectrum with <sup>1</sup>H decoupling

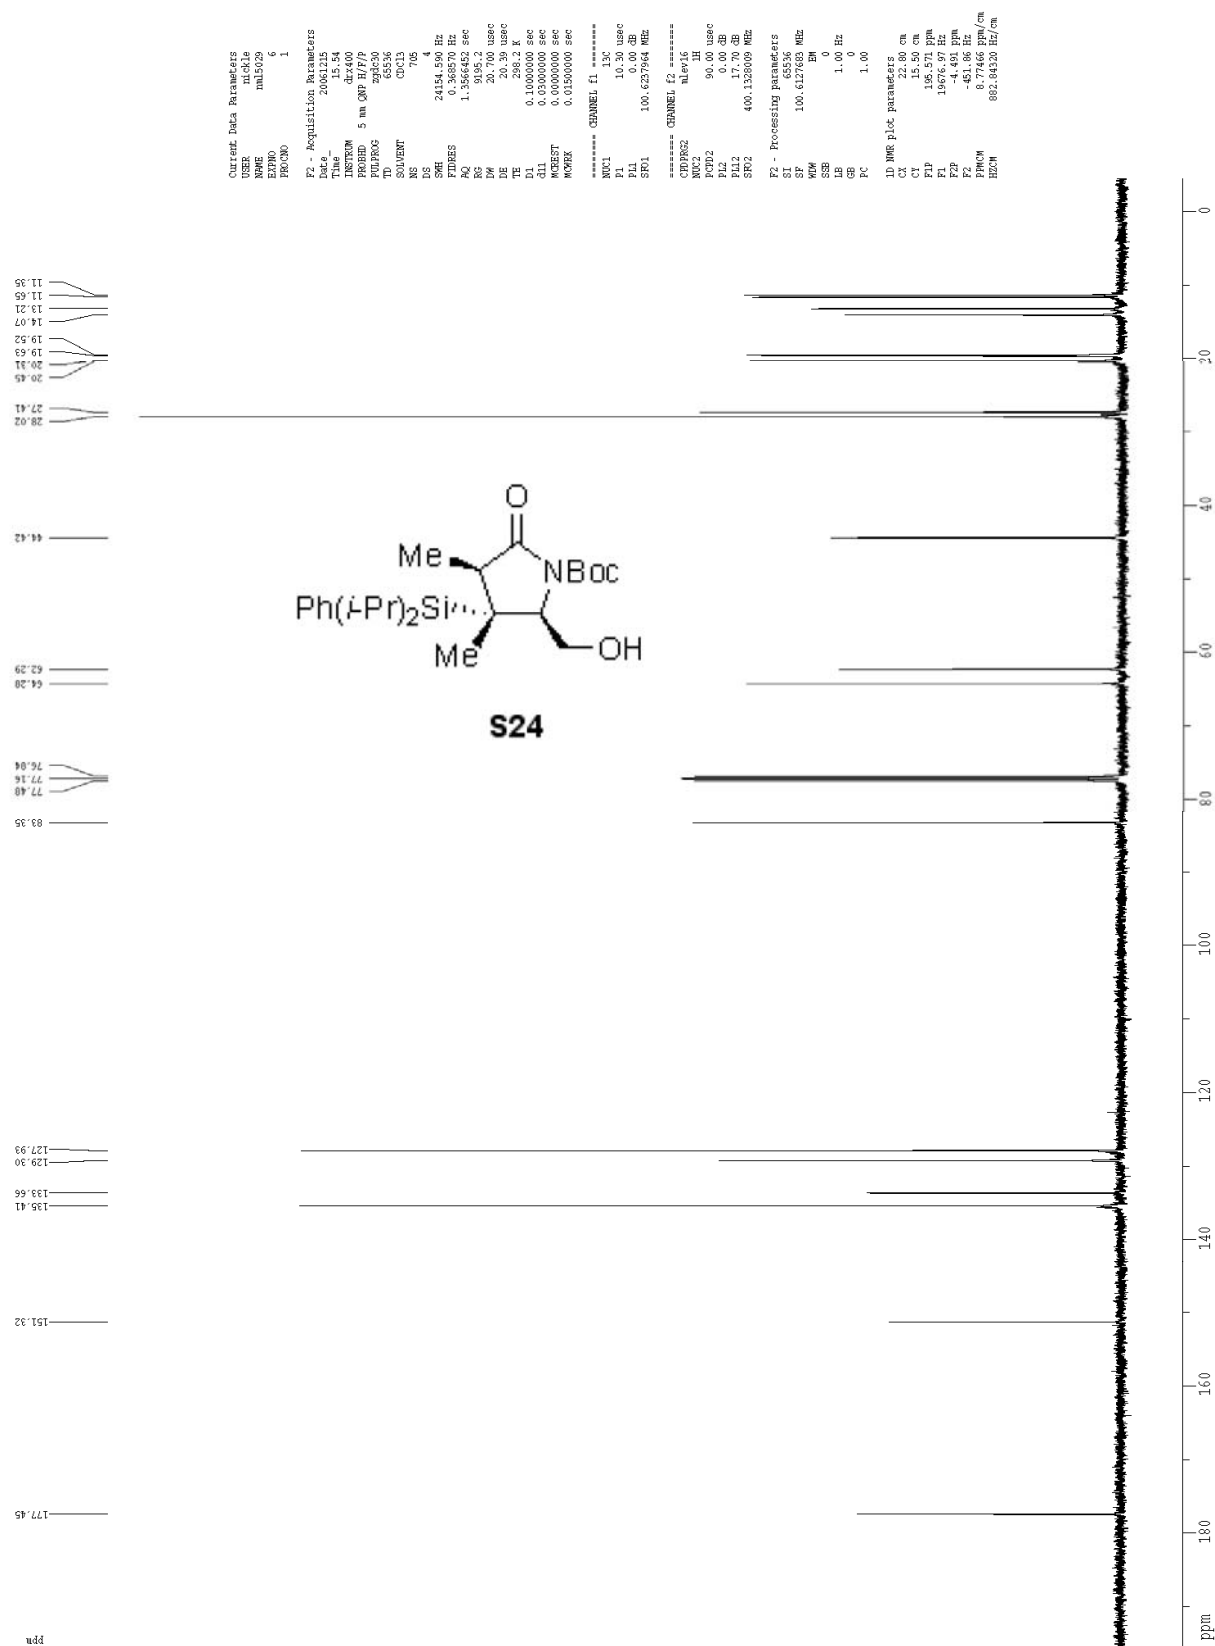

<sup>1</sup>H spectrum

Chemical structure of S25:

C[C@H]1C(=O)N(Cc2ccccc2)[C@@H](C)[C@H]1COP(=O)(OC)c3ccccc3

**S25**

Current Data Parameters  
USER nickle  
NAME ml5007  
EXPNO 1  
PROCNO 1

F2 - Acquisition Parameters  
Date\_ 20080113  
Time 8.33  
INSTRUM spect  
PROBHD 5 mm QNP H/F/7  
PULPROG zgpg30  
TD 65536  
SOLVENT cdcl3f  
NS 8  
DS 2  
SWH 6410.245 Hz  
FIDRES 0.097813 Hz  
AQ 5.1118579 sec  
RG 327.4  
RW 78.00 MHz  
DE 4.50 MHz  
TE 298.1 K  
D1 0.1000000 sec  
d11 0.0500000 sec  
DELTA 0.0500000 sec  
MOVER 0.0150000 sec

===== CHANNEL f1 =====  
NUC1 13C  
P1 12.00 usec  
PL1 0.00 dB  
SR01 400.1328009 MHz

F2 - Processing parameters  
SI 65536  
SF 400.1300213 MHz  
WDW EM  
SSB 0  
LB 0.30 Hz  
GB 0  
PC 2.00

ID RMS plot parameters  
CX 22.80 cm  
CY 15.00 cm  
FLIP 15.00 cm  
F1P 3282.34 Hz  
F2P -0.315 PPM  
FZ -126.01 Hz  
GAMMA 0.728356/cm  
HZMM 149.48885 Hz/cm

Integration values (from left to right): 0.0075, 0.0001, 1.5507, 1.5454, 1.2975, 1.2388, 1.2195, 1.1796, 1.1691, 1.1608, 1.1501, 1.0964, 2.4164, 2.9116, 4.4315, 4.4154, 4.0072, 1.0000, 1.0034, 1.0009, 2.0032, 2.0094, 5.0093.



$^{13}\text{C}$  spectrum with  $^1\text{H}$  decoupling

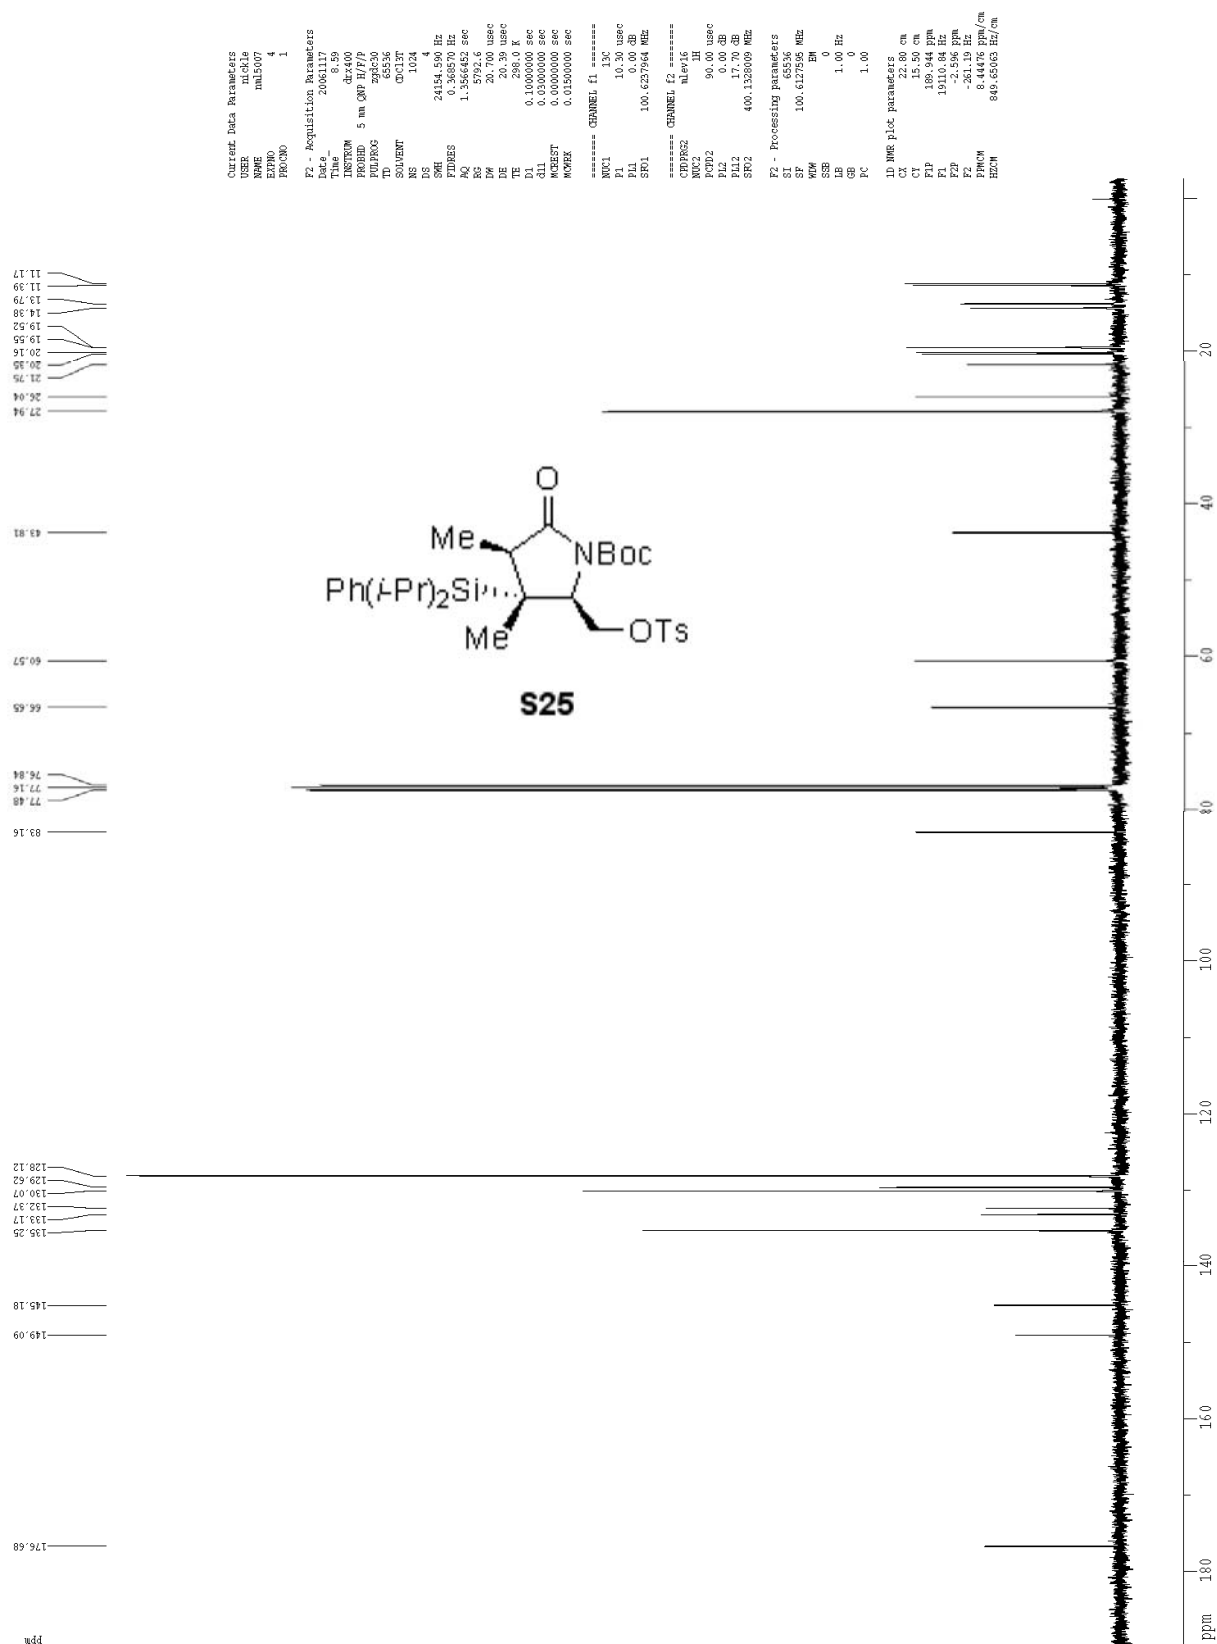

Note: Compound **S26** is an intermediate in the formation of lactam **18** (Scheme 3.)

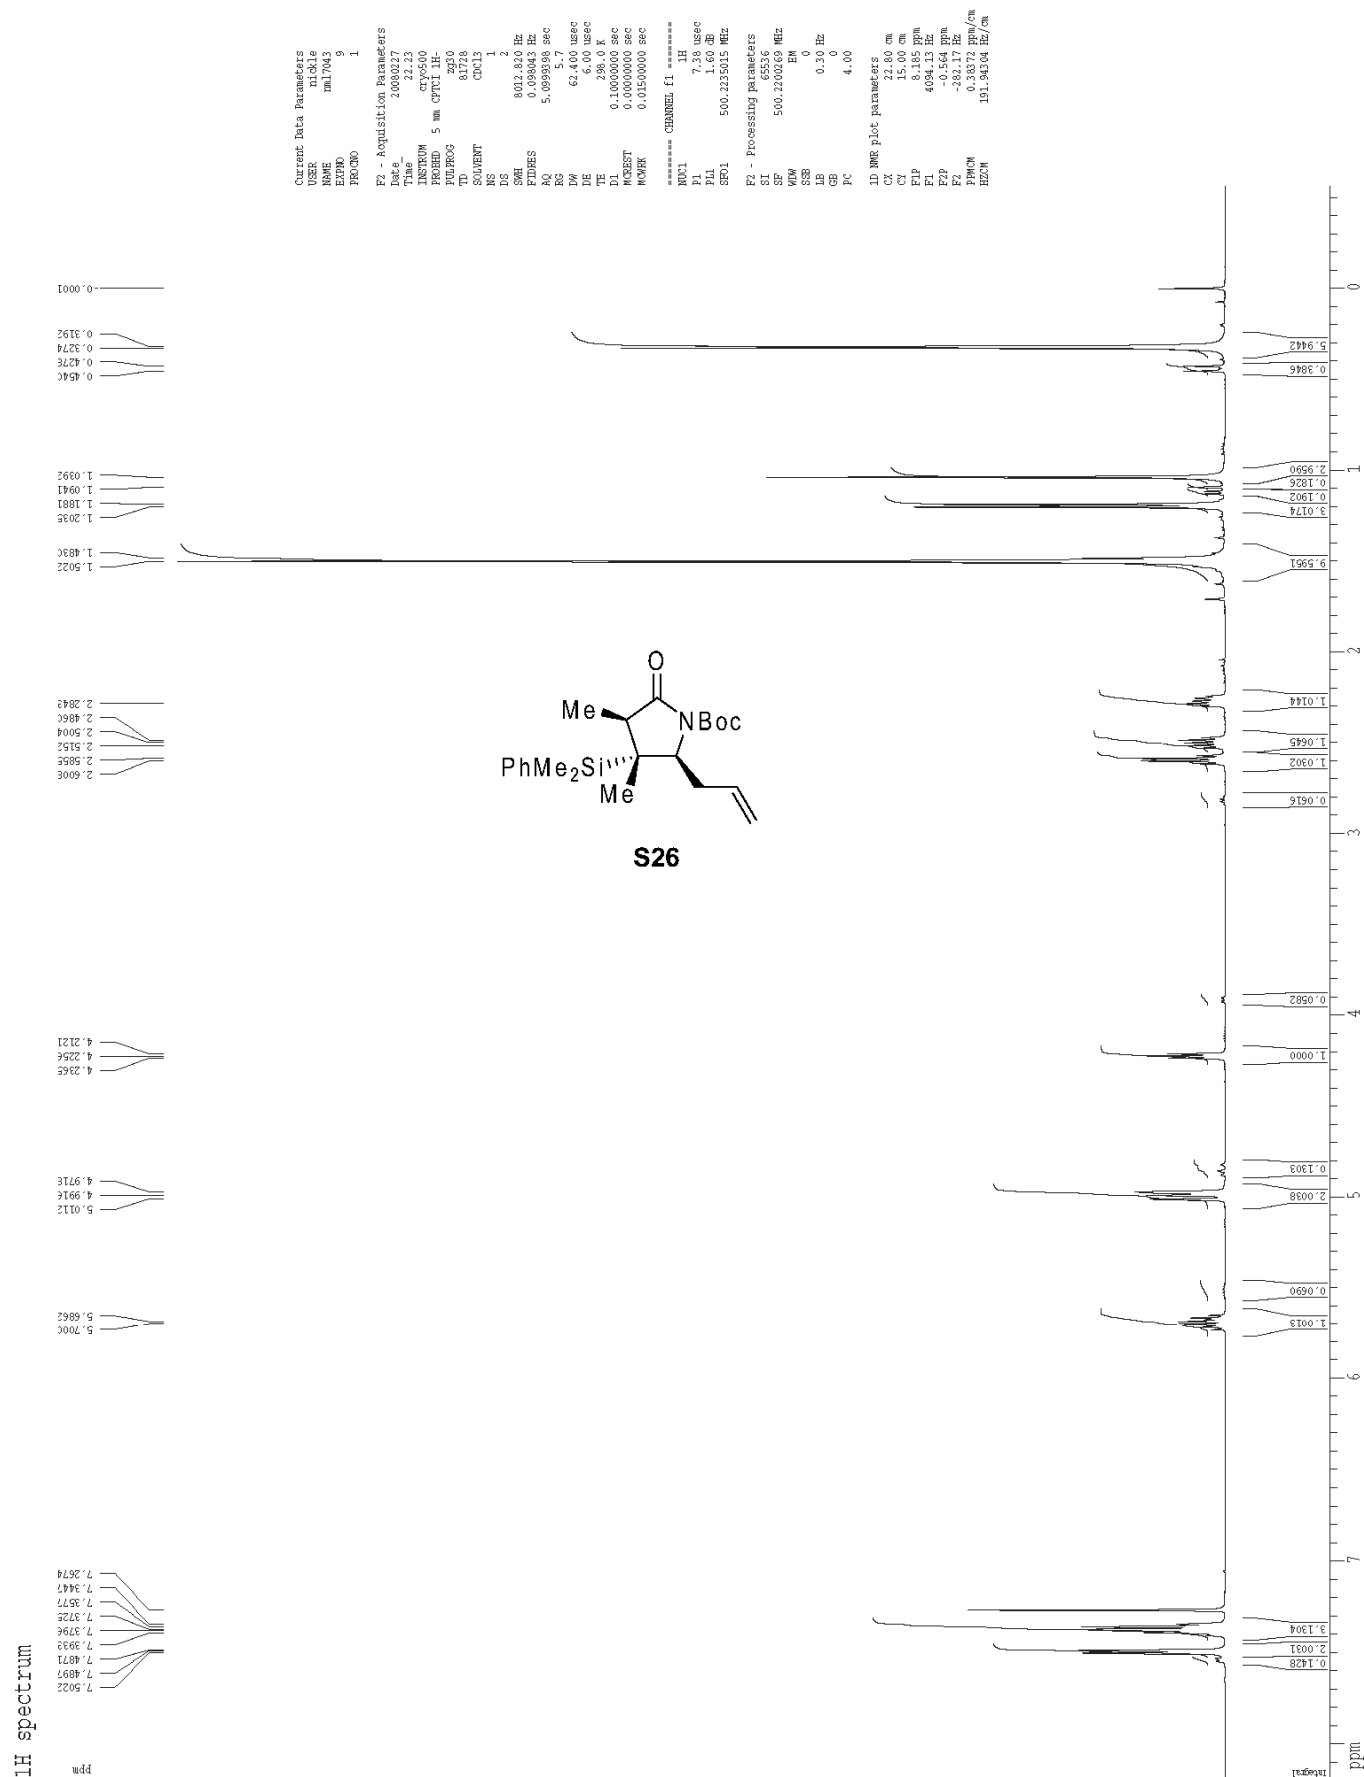

Note: Compound **S26** is an intermediate in the formation of lactam **18** (Scheme 3.)

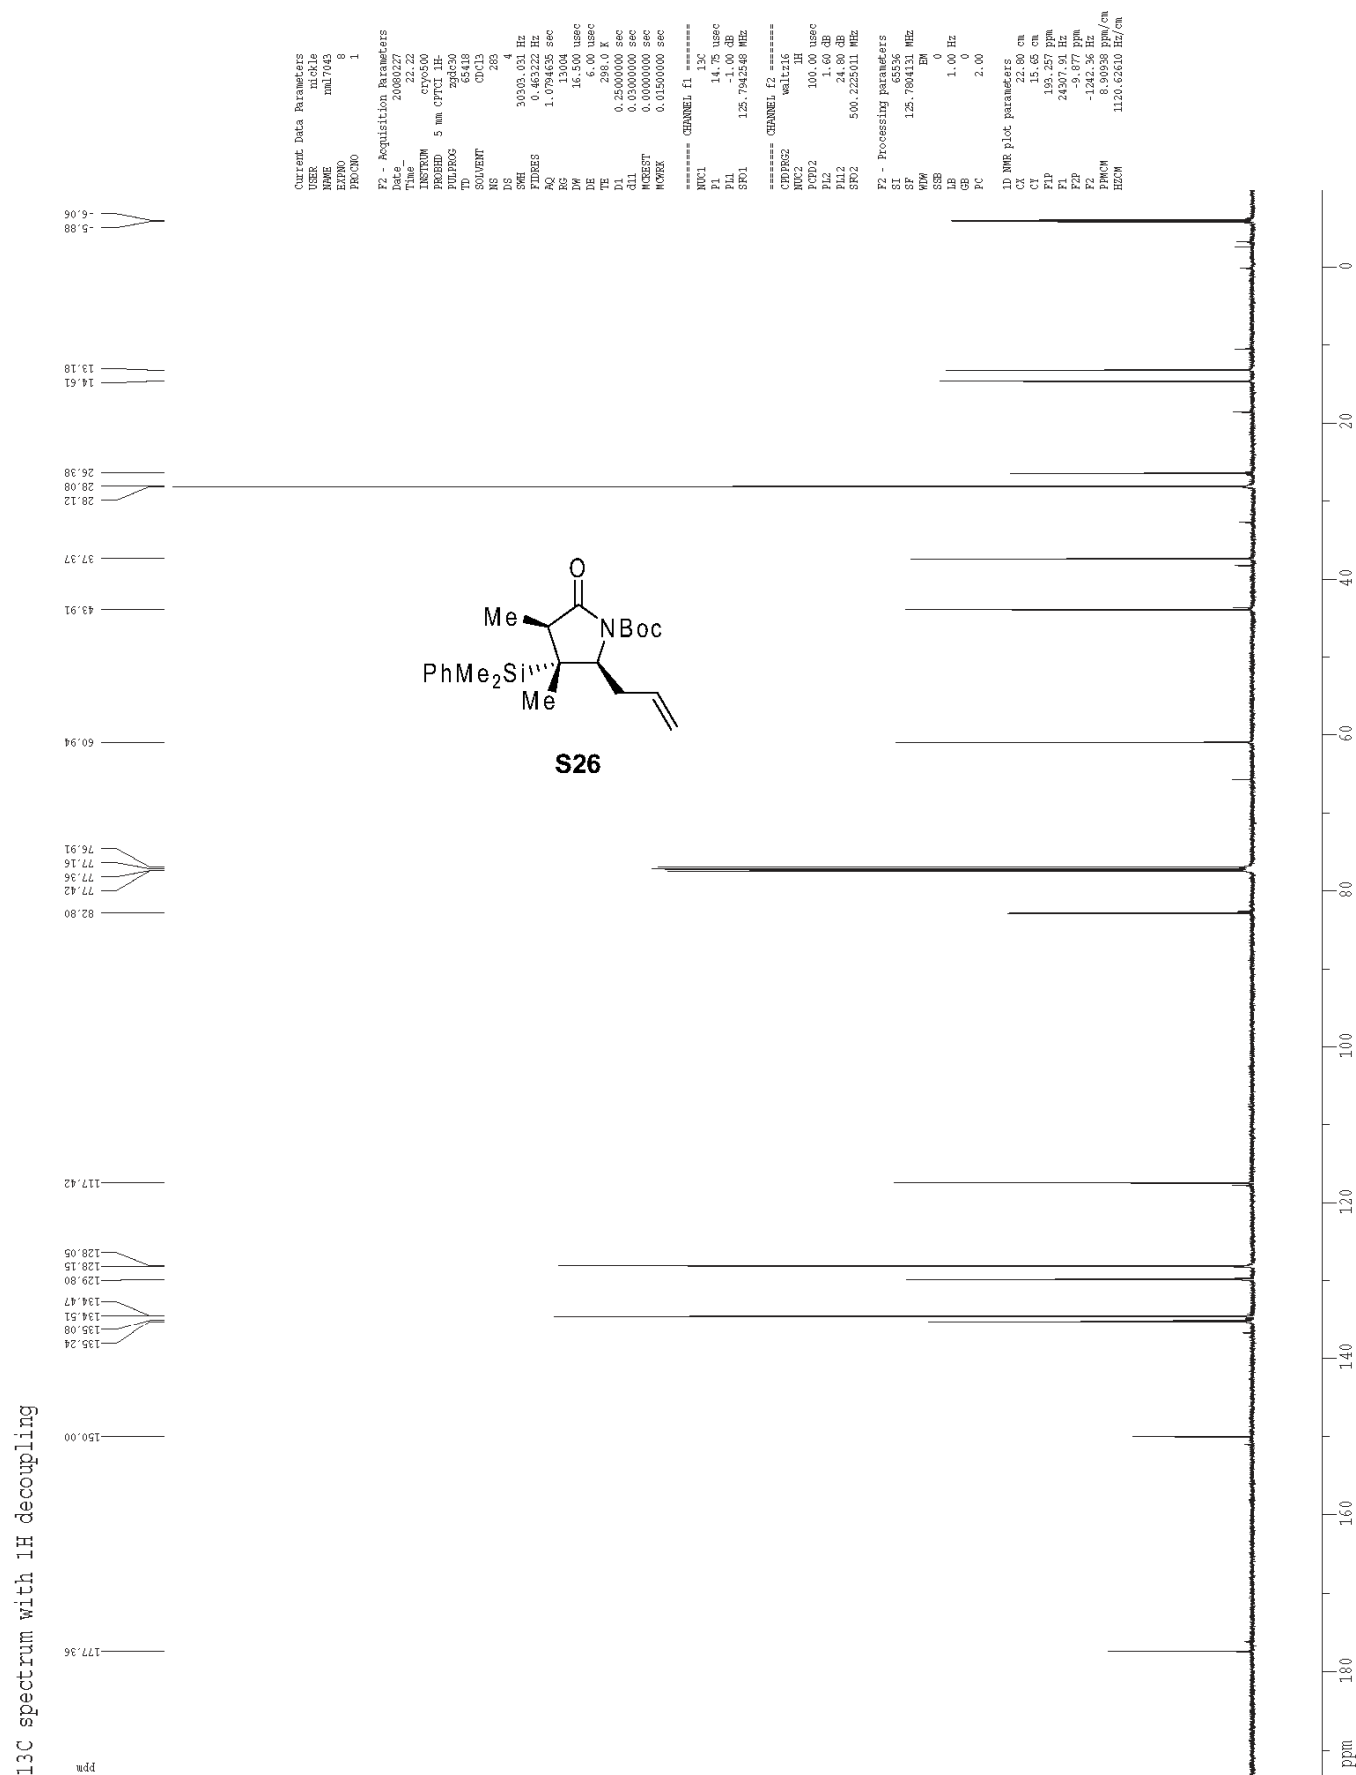

PI Woerpel  
h1 CDCl3T v nickle 15

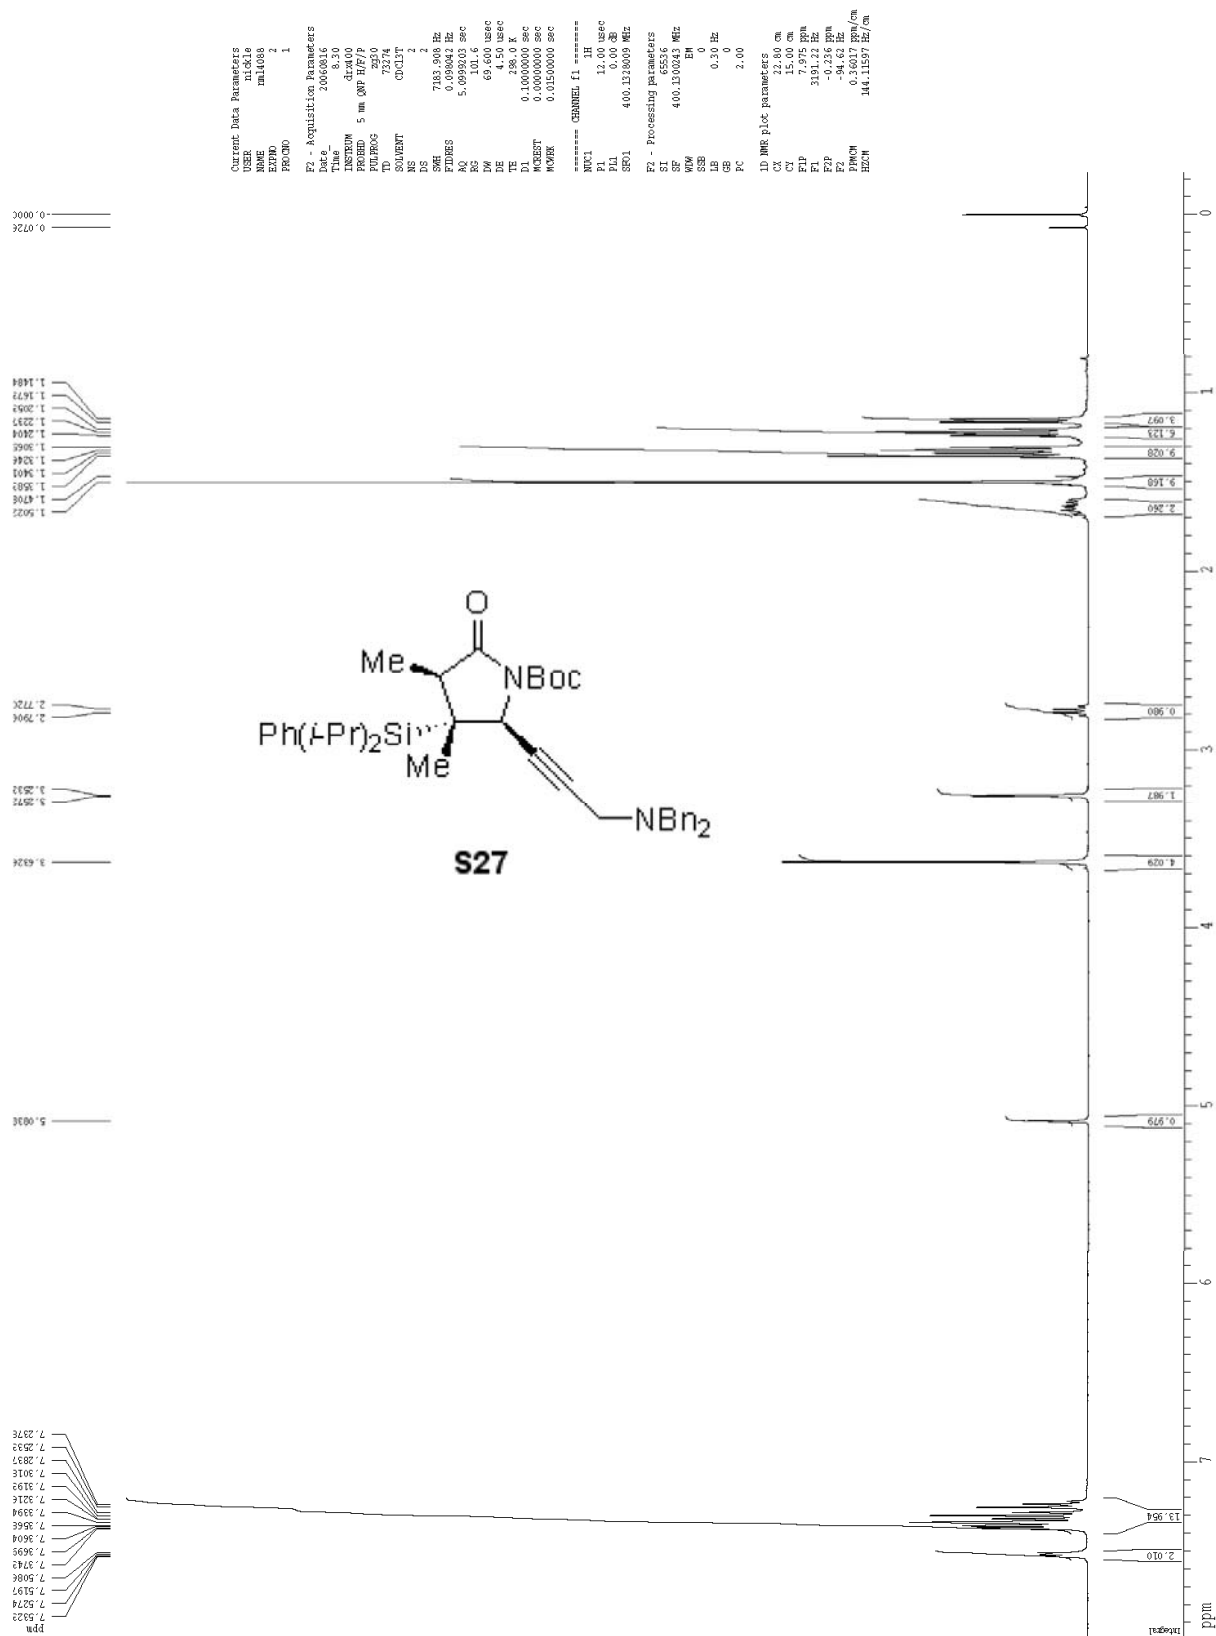

Note: Compound **S27** is an intermediate in the formation of lactam **19** (Scheme 4.)

PI Woerpel  
c13 CDCl3T v nickle 15

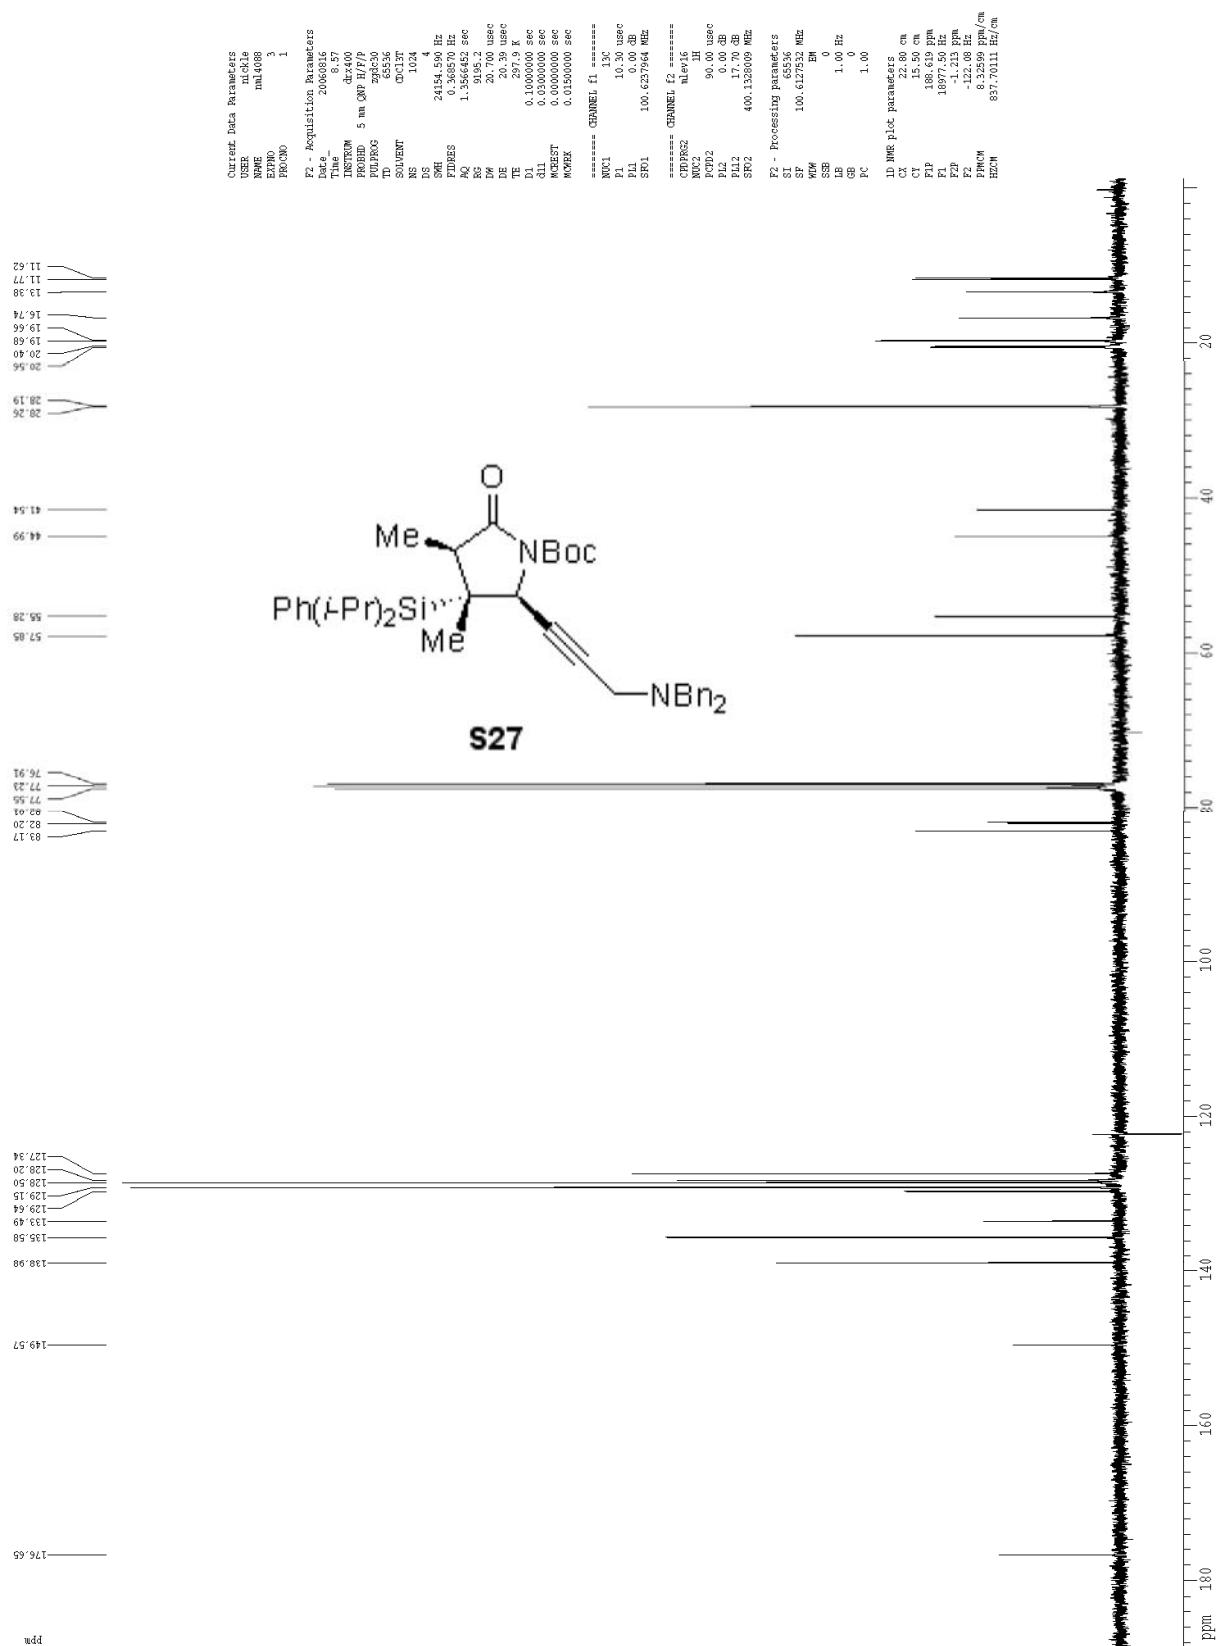

<sup>1</sup>H spectrum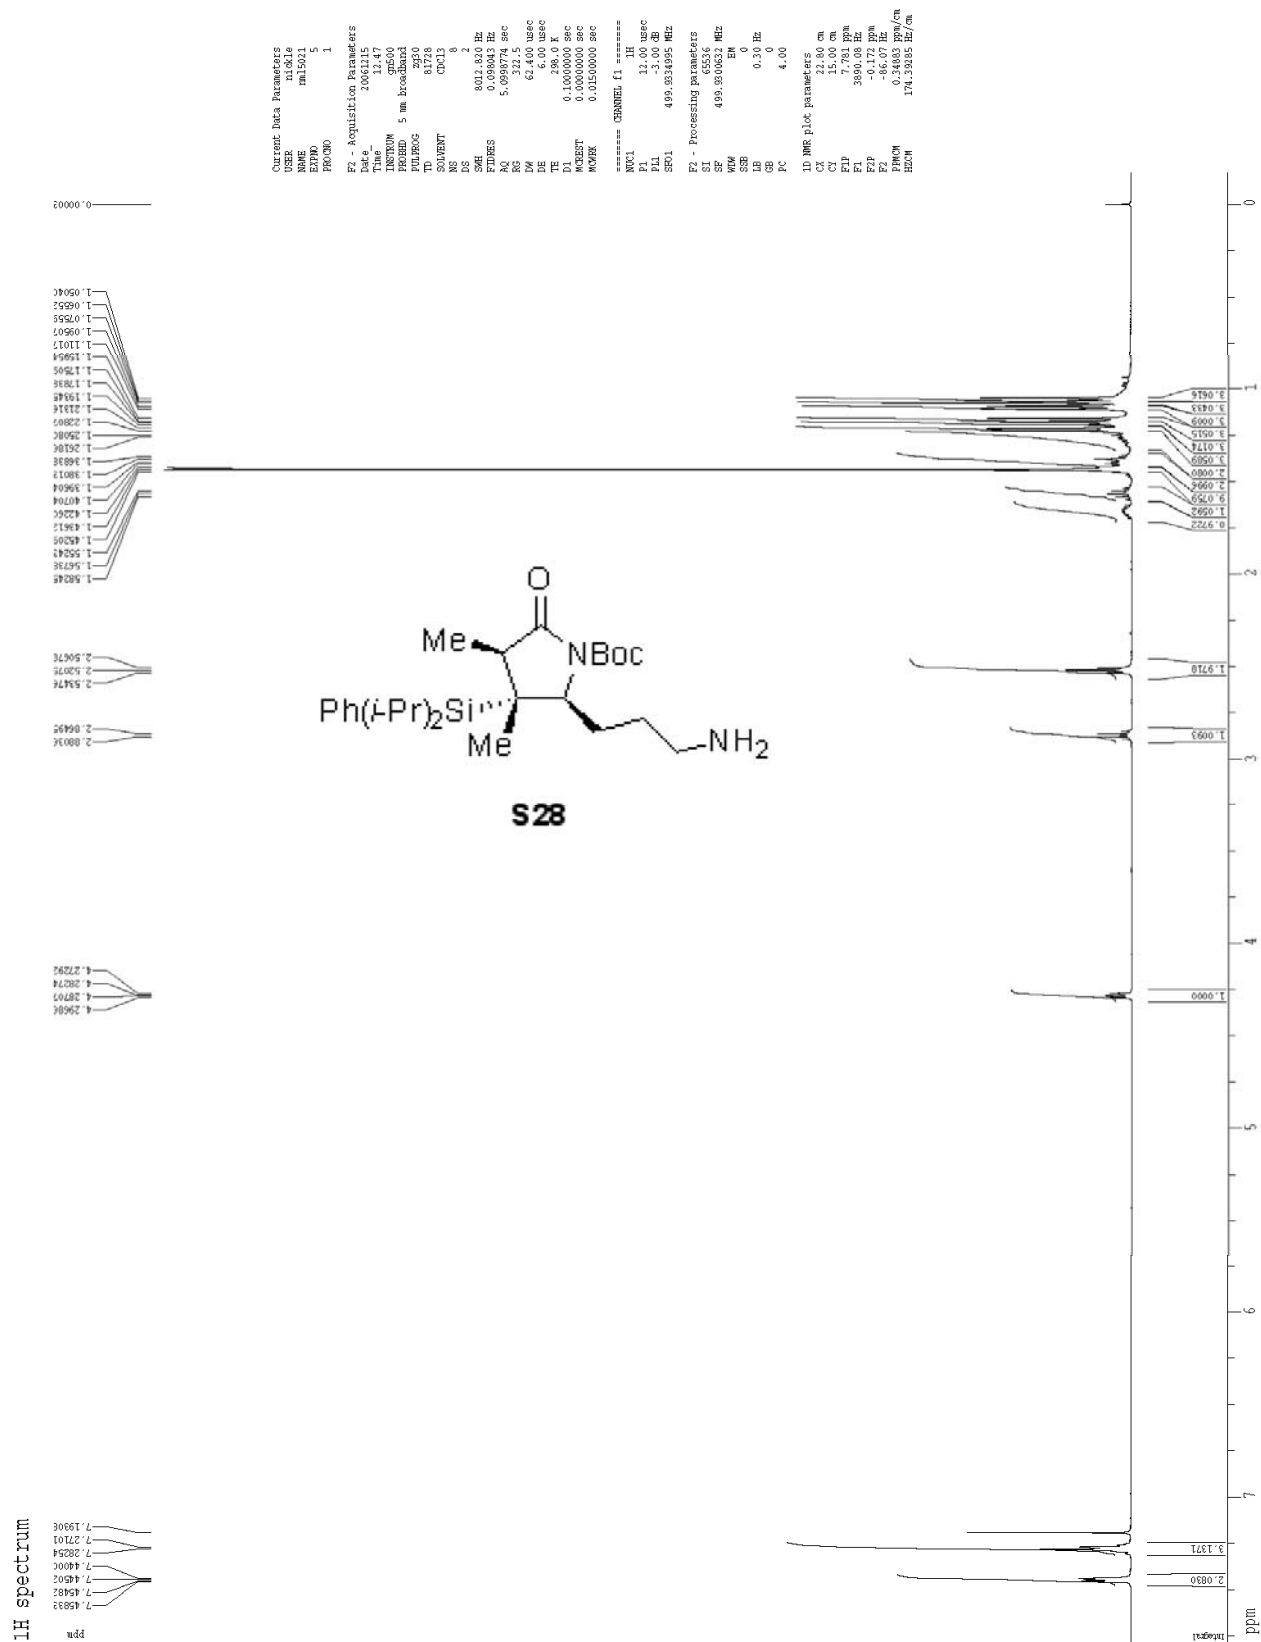

Note: Compound **S28** is an intermediate in the formation of lactam **19** (Scheme 4.)

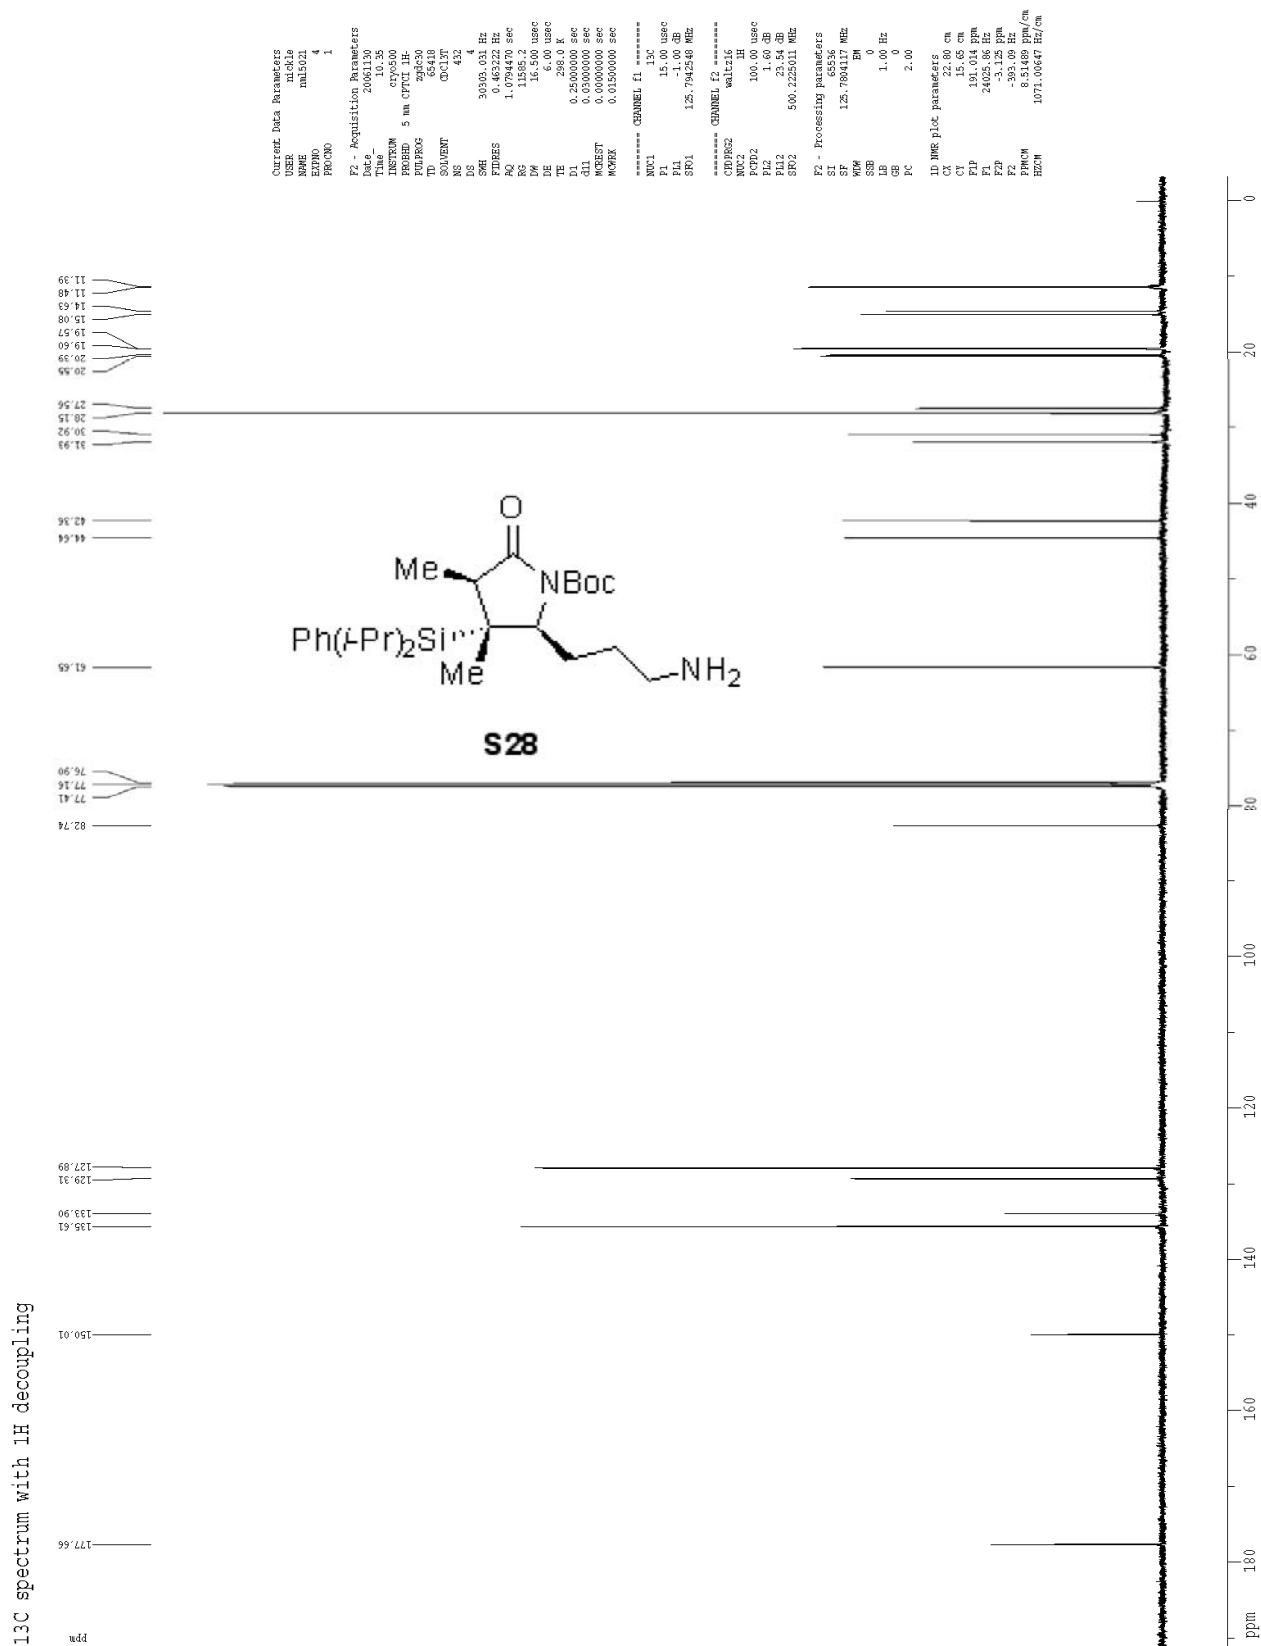

Note: Compound **(-)-S29** is an intermediate in the formation of *N,O*-acetal **(+)-21** (Scheme 5.)

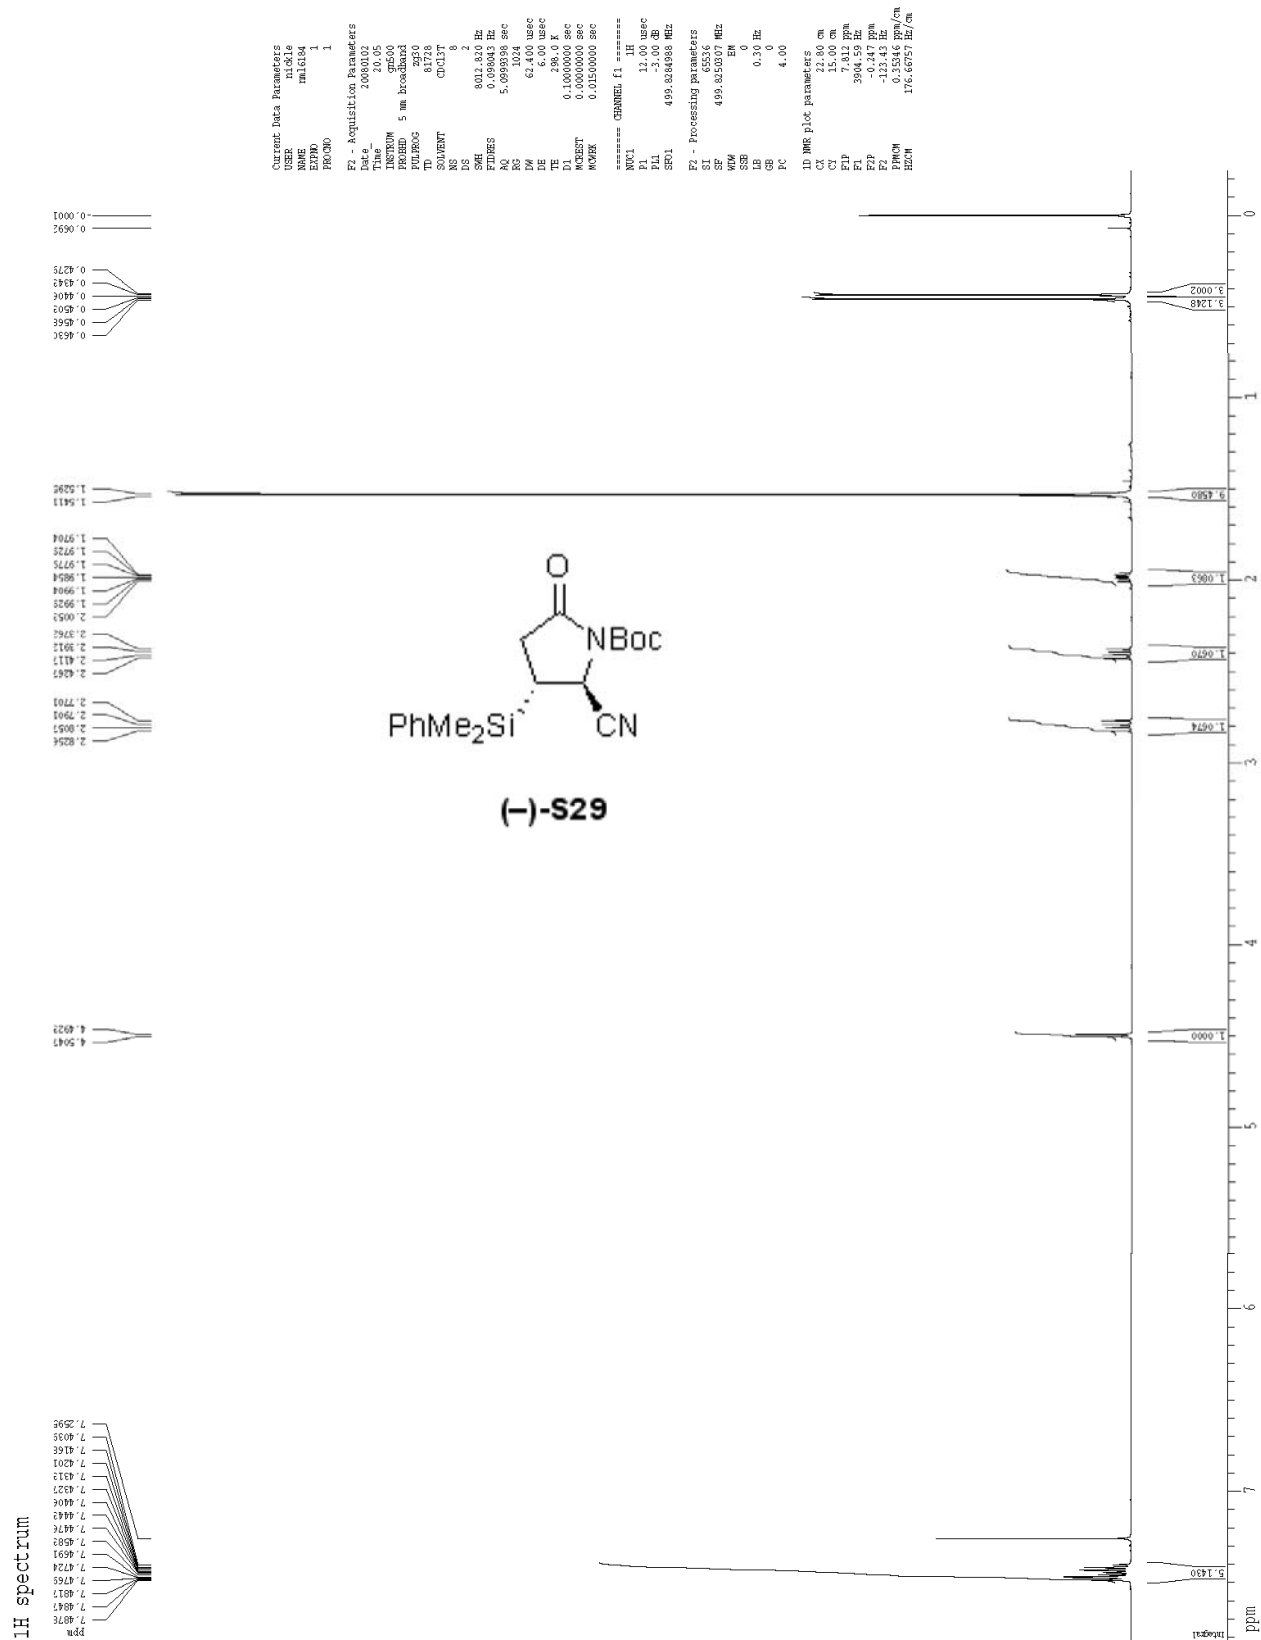



Note: Compound (-)-**S29** is an intermediate in the formation of *N,O*-acetal (+)-**21** (Scheme 5.)

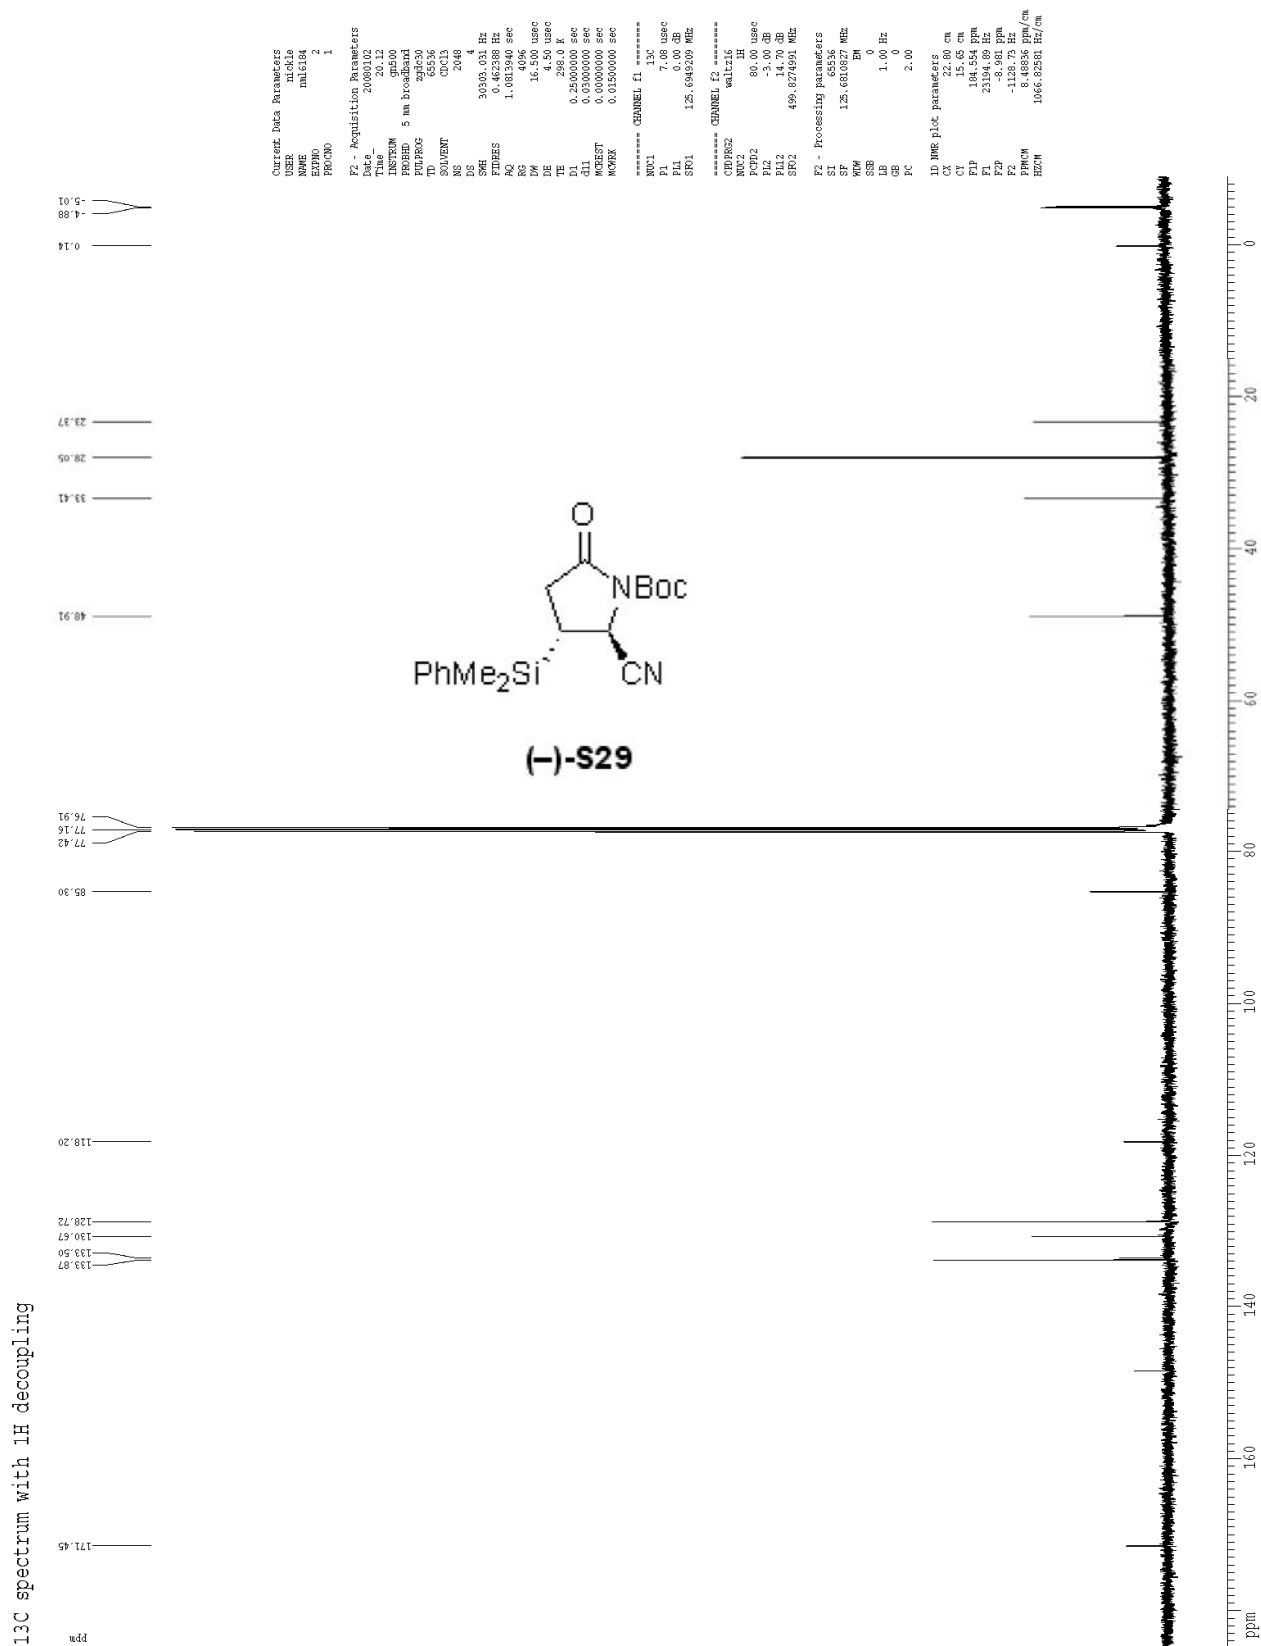

Note: Compound **(-)-S30** is an intermediate in the formation of *N,O*-acetal **(+)-21** (Scheme 5.)

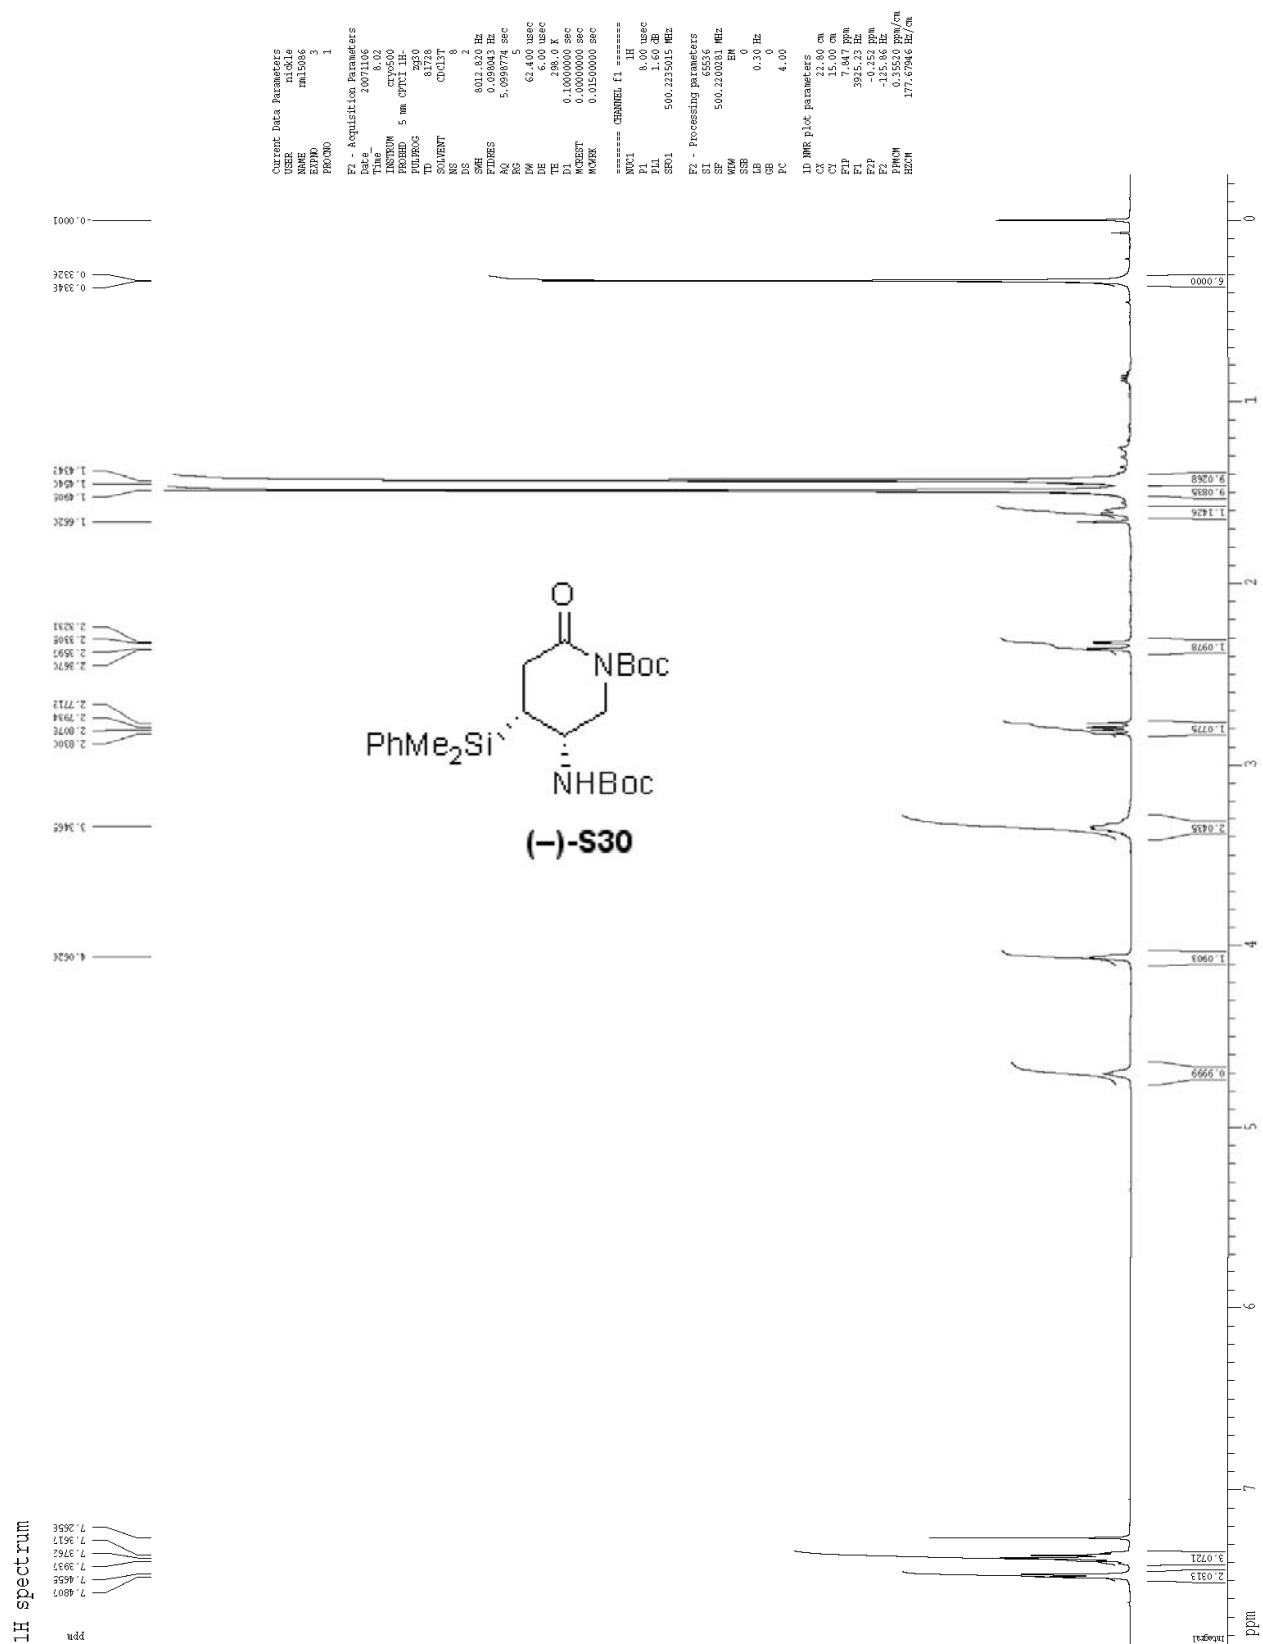

Note: Compound (–)-**S30** is an intermediate in the formation of *N,O*-acetal (+)-**21** (Scheme 5.)

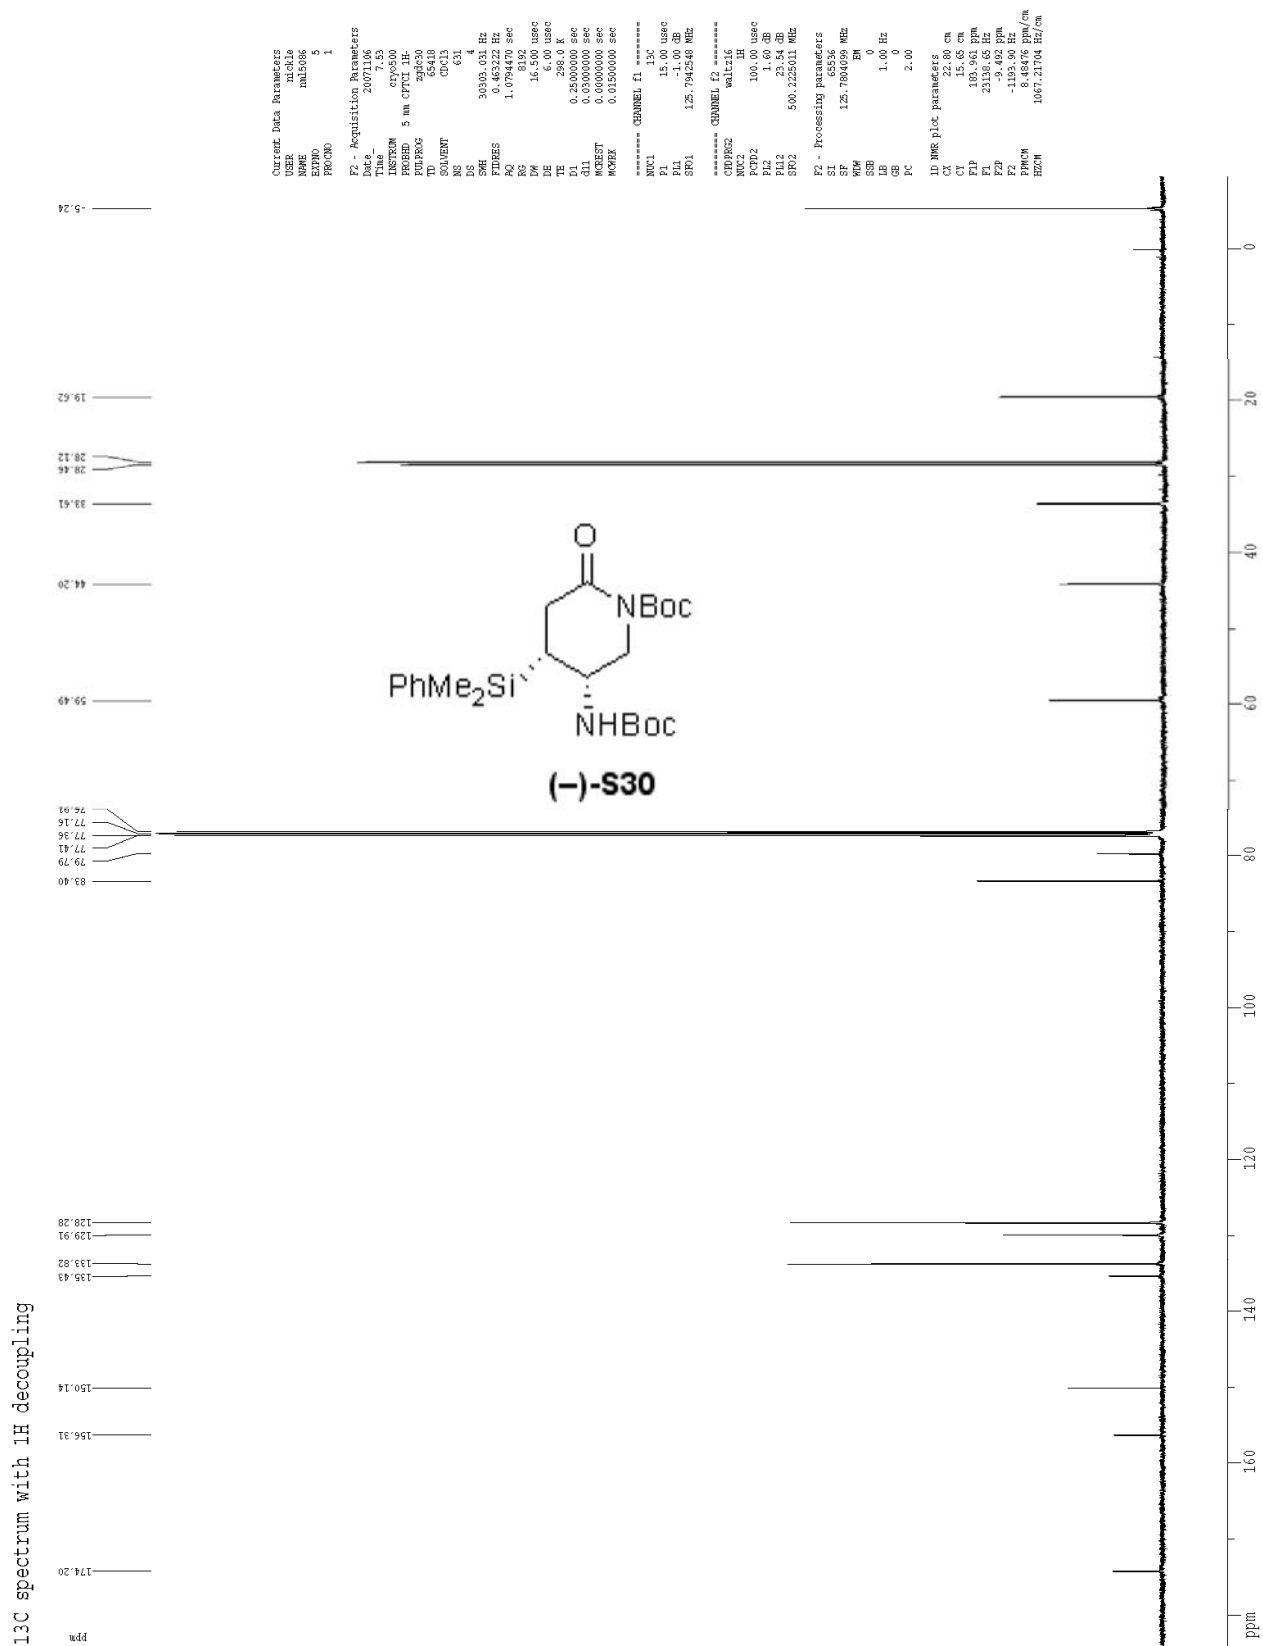

Supplement: Supplementary file 1 [file 4524688]
